# Supplementary material for: Cu-Catalyzed carbamoylationversusamination of quinolineN-oxide with formamides
Source: Royal Society of Chemistry journal article supplement (doi:10.1039/c8ob02844c), 2018-12-08

---

## **Cu-Catalyzed Carbamoylation versus Amination of Quinoline *N*-Oxide with Formamides**

Yan Zhang, Shiwei Zhang, Guangxing Xu, **Min Li**, Chunlei Tang, Weizheng Fan

School of Pharmaceutical Science, Jiangnan University, Wuxi 214122, P. R. China.

E-mail: zhangyan@jiangnan.edu.cn; Fax: (+86)-0510-85197052

### **Supporting Information**

#### **Table of Contents**

|                                                                                    |    |
|------------------------------------------------------------------------------------|----|
| 1. General Information .....                                                       | 2  |
| 2. Optimization of the Reaction Conditions .....                                   | 2  |
| 3. General Procedure and Characterization of Products .....                        | 5  |
| 4. Synthetic Utility of Methodology .....                                          | 25 |
| 5. Mechanistic Study .....                                                         | 27 |
| 6. Reference .....                                                                 | 33 |
| 7. <sup>1</sup> H and <sup>13</sup> C NMR Spectra of Substrates and Products ..... | 35 |

## 1. General Information

Reactions were monitored by TLC on silica gel plates (GF254), and the analytical thin-layer chromatography (TLC) was performed on precoated, glass-backed silica gel plates. Commercially available materials were used as purchased.  $^1\text{H}$  and  $^{13}\text{C}$  NMR spectra were recorded on Bruker AV400 (400 MHz) spectrometers. Chemical shifts were recorded in parts per million (ppm,  $\delta$ ) relative to tetramethylsilane ( $\delta$  0.00) or chloroform ( $\delta$  = 7.26, singlet). NMR splitting patterns are designated as singlet (s), doublet (d), triplet (t), quartet (q), dd (doublet of doublets), m (multiplets), etc. All first-order splitting patterns were assigned on the basis of the appearance of the multiplet. Splitting patterns that could not be easily interpreted are designated as multiplet (m) or broad (br). HRMS were recorded on Waters Xevo G2 Q-TOF instrument.

## 2. Optimization of the Reaction Conditions

### 2.1 Optimization of the Carbamoylation Reaction Conditions

Table S1 Screening of Copper Salts <sup>a</sup>

CN(C)C=O + [O-][N+]1C=Cc2ccccc12 >> CN(C)C(=O)C1=Cc2ccccc1[N+]2[O-]

| Entry | Catalyst                              | Oxidant | Solvent | Temperature | Yield <sup>b</sup> (%) |
|-------|---------------------------------------|---------|---------|-------------|------------------------|
| 1     | Cu <sub>2</sub> O                     | TBHP    | DMSO    | rt          | 32                     |
| 2     | CuI                                   | TBHP    | DMSO    | rt          | 7                      |
| 3     | CuCl                                  | TBHP    | DMSO    | rt          | 29                     |
| 4     | Cu(MeCN) <sub>4</sub> BF <sub>4</sub> | TBHP    | DMSO    | rt          | 63                     |
| 5     | CuOTf                                 | TBHP    | DMSO    | rt          | 58                     |
| 6     | CuBr                                  | TBHP    | DMSO    | rt          | 85                     |
| 7     | CuCN                                  | TBHP    | DMSO    | rt          | 69                     |
| 8     | CuOAc                                 | TBHP    | DMSO    | rt          | 33                     |

<sup>a</sup> Reaction conditions: **6a** (0.2 mmol), **7a** (10 equiv), TBHP (5.0-6.0 M in decane) (2 equiv), Cu catalyst (10 mol%), DMSO (1 mL), room temperature; <sup>b</sup> Isolated yield.

Table S2 Screening of Oxidants <sup>a</sup>

CN(C)C=O + [O-][N+]1C=Cc2ccccc12 >> CN(C)C(=O)C1=Cc2ccccc1[N+]2[O-]

| Entry | Catalyst | Oxidant | Solvent | Temperature | Yield <sup>b</sup> (%) |
|-------|----------|---------|---------|-------------|------------------------|
| 1     | CuBr     | TBHP    | DMSO    | rt          | 85                     |
| 2     | CuBr     | DTBP    | DMSO    | rt          | 71                     |
| 3     | CuBr     | BPO     | DMSO    | rt          | 62                     |

|   |      |                                              |      |    |       |
|---|------|----------------------------------------------|------|----|-------|
| 4 | CuBr | K <sub>2</sub> S <sub>2</sub> O <sub>8</sub> | DMSO | rt | trace |
| 5 | CuBr | Ag <sub>2</sub> CO <sub>3</sub>              | DMSO | rt | trace |
| 6 | CuBr | PhI(OAc) <sub>2</sub>                        | DMSO | rt | trace |
| 7 | CuBr | H <sub>2</sub> O <sub>2</sub>                | DMSO | rt | 39    |
| 8 | CuBr | O <sub>2</sub>                               | DMSO | rt | trace |
| 9 | CuBr | air                                          | DMSO | rt | trace |

<sup>a</sup> Reaction conditions: **6a** (0.2 mmol), **7a** (10 equiv), oxidant (2 equiv), CuBr (10 mol%), DMSO (1 mL), room temperature; <sup>b</sup> Isolated yield.

**Table S3 Screening of Solvents <sup>a</sup>**

**6a** + **7a**  $\xrightarrow[\text{solvent, temperature}]{\text{catalyst, oxidant}}$  **8a**

| Entry | Catalyst | Oxidant | Solvent | Temperature | Yield <sup>b</sup> (%) |
|-------|----------|---------|---------|-------------|------------------------|
| 1     | CuBr     | TBHP    | DMSO    | rt          | 85                     |
| 2     | CuBr     | TBHP    | EtOAc   | rt          | 57                     |
| 3     | CuBr     | TBHP    | DCE     | rt          | trace                  |
| 4     | CuBr     | TBHP    | MeCN    | rt          | trace                  |
| 5     | CuBr     | TBHP    | toluene | rt          | 50                     |
| 6     | CuBr     | TBHP    | EtOH    | rt          | trace                  |

<sup>a</sup> Reaction conditions: **6a** (0.2 mmol), **7a** (10 equiv), TBHP (5.0-6.0 M in decane) (2 equiv), CuBr (10 mol%), solvent (1 mL), room temperature; <sup>b</sup> Isolated yield.

## 2.2 Optimization of the Amination Reaction Conditions

**Table S4 Screening of Copper Salts <sup>a</sup>**

**6a** + **7b**  $\xrightarrow[\text{solvent, temperature}]{\text{catalyst, initiator}}$  **9a**

| Entry | Catalyst                              | Initiator | Solvent | Temperature | Yield <sup>b</sup> (%) |
|-------|---------------------------------------|-----------|---------|-------------|------------------------|
| 1     | CuBr                                  | TBHP      | DMSO    | rt          | 11                     |
| 2     | CuI                                   | TBHP      | DMSO    | rt          | 50                     |
| 3     | CuCl                                  | TBHP      | DMSO    | rt          | trace                  |
| 4     | Cu(MeCN) <sub>4</sub> BF <sub>4</sub> | TBHP      | DMSO    | rt          | trace                  |
| 5     | CuOTf                                 | TBHP      | DMSO    | rt          | trace                  |
| 6     | Cu <sub>2</sub> O                     | TBHP      | DMSO    | rt          | trace                  |

|   |       |      |      |    |       |
|---|-------|------|------|----|-------|
| 7 | CuCN  | TBHP | DMSO | rt | trace |
| 8 | CuOAc | TBHP | DMSO | rt | trace |

<sup>a</sup> Reaction conditions: **6a** (0.2 mmol), **7b** (10 equiv), TBHP (5.0-6.0 M in decane) (0.05 equiv), Cu catalyst (10 mol%), DMSO (1 mL), room temperature; <sup>b</sup> Isolated yield.

**Table S5 Screening of Initiators <sup>a</sup>**

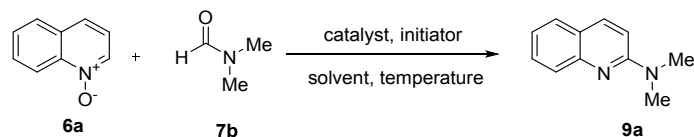

| Entry | Catalyst | Initiator                                    | Solvent | Temperature | Yield <sup>b</sup> (%) |
|-------|----------|----------------------------------------------|---------|-------------|------------------------|
| 1     | CuI      | TBHP                                         | DMSO    | rt          | 50                     |
| 2     | CuI      | DTBP                                         | DMSO    | rt          | 37                     |
| 3     | CuI      | K <sub>2</sub> S <sub>2</sub> O <sub>8</sub> | DMSO    | rt          | trace                  |
| 4     | CuI      | Ag <sub>2</sub> CO <sub>3</sub>              | DMSO    | rt          | trace                  |
| 5     | CuI      | PhI(OAc) <sub>2</sub>                        | DMSO    | rt          | trace                  |
| 6     | CuI      | H <sub>2</sub> O <sub>2</sub>                | DMSO    | rt          | 12                     |
| 7     | CuI      | O <sub>2</sub>                               | DMSO    | rt          | trace                  |
| 8     | CuI      | air                                          | DMSO    | rt          | trace                  |

<sup>a</sup> Reaction conditions: **6a** (0.2 mmol), **7b** (10 equiv), initiator (0.05 equiv), CuI (10 mol%), DMSO (1 mL), room temperature; <sup>b</sup> Isolated yield.

**Table S6 Screening of Solvents <sup>a</sup>**

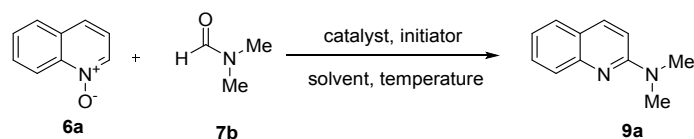

| Entry | Catalyst | Initiator | Solvent                         | Temperature | Yield <sup>b</sup> (%) |
|-------|----------|-----------|---------------------------------|-------------|------------------------|
| 1     | CuI      | TBHP      | DMSO                            | rt          | 50                     |
| 2     | CuI      | TBHP      | EtOAc                           | rt          | trace                  |
| 3     | CuI      | TBHP      | CH <sub>2</sub> Cl <sub>2</sub> | rt          | 67                     |
| 4     | CuI      | TBHP      | MeCN                            | rt          | trace                  |
| 6     | CuI      | TBHP      | toluene                         | rt          | trace                  |
| 7     | CuI      | TBHP      | EtOH                            | rt          | trace                  |

<sup>a</sup> Reaction conditions: **6a** (0.2 mmol), **7b** (10 equiv), TBHP (5.0-6.0 M in decane) (0.05 equiv), CuI (10 mol%), solvent (1 mL), room temperature; <sup>b</sup> Isolated yield.

**Table S7 Screening of Temperatures <sup>a</sup>**

| 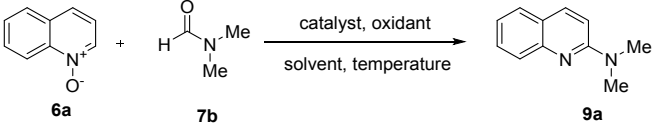 |          |           |                                 |             |                        |
|------------------------------------------------------------------------------------|----------|-----------|---------------------------------|-------------|------------------------|
| Entry                                                                              | Catalyst | Initiator | Solvent                         | Temperature | Yield <sup>b</sup> (%) |
| 1                                                                                  | CuI      | TBHP      | CH <sub>2</sub> Cl <sub>2</sub> | rt          | 67                     |
| 2                                                                                  | CuI      | TBHP      | CH <sub>2</sub> Cl <sub>2</sub> | 40 °C       | 73                     |

<sup>a</sup> Reaction conditions: **6a** (0.2 mmol), **7b** (10 equiv), TBHP (5.0-6.0 M in decane) (0.05 equiv), CuI (10 mol%), CH<sub>2</sub>Cl<sub>2</sub> (1 mL); <sup>b</sup> Isolated yield.

### 3. General Procedure and Characterization of Products

#### 3.1 Synthesis of substrates quinoline *N*-oxide derivatives **6**

The substrates quinoline *N*-oxide derivatives **6** were synthesized according to the corresponding literatures with minor modifications. <sup>1-4</sup>

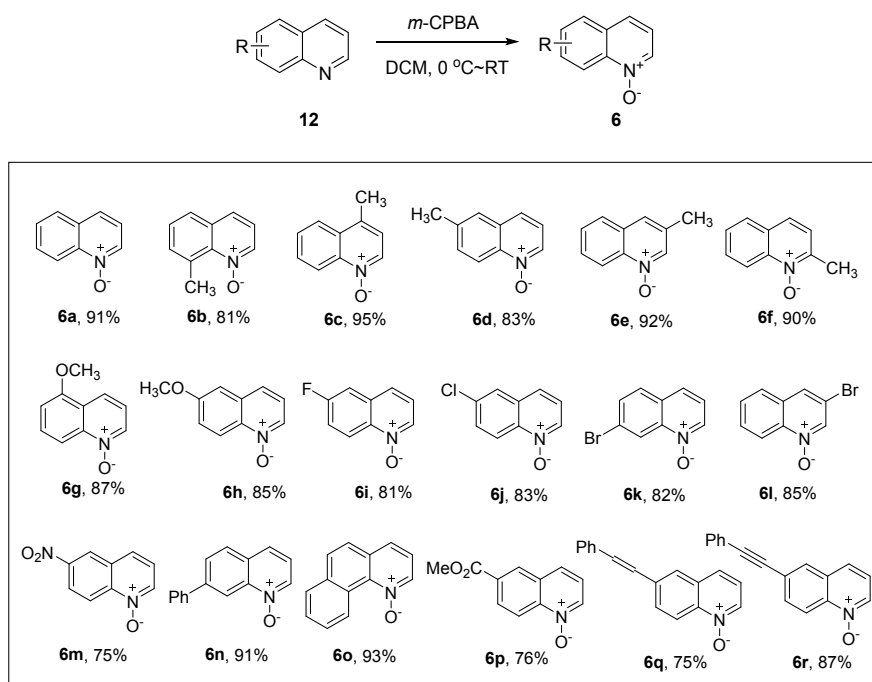

Under vigorous magnetic stirring, 3-chloroperbenzoic acid (*m*-CPBA) (345 mg, 2 mmol) in CH<sub>2</sub>Cl<sub>2</sub> (10 mL) was dropped into solution of quinoline derivatives **12** (2 mmol) in CH<sub>2</sub>Cl<sub>2</sub> (10 mL) cooled to 0 °C. After the completion of this course, the reaction mixture was allowed up to room

temperature and stirred overnight. An aqueous solution of saturated  $\text{NaHCO}_3$  was added to the mixture to neutralize residual *m*-CPBA. The resulting mixture was extracted with  $\text{CH}_2\text{Cl}_2$  ( $3 \times 10$  mL). The organic phase was combined and washed with saturated  $\text{NaCl}$  solution ( $3 \times 5$  mL). The organic layer was dried over anhydrous  $\text{Na}_2\text{SO}_4$ , filtered and evaporated under reduced pressure to give crude products, which were purified by column chromatography (silica gel 300–400 mesh, EA: MeOH (8:1) as eluent). The products were identified by  $^1\text{H}$  NMR and  $^{13}\text{C}$  NMR spectra and compared to the previous literatures.

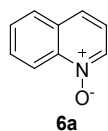

The compound is known<sup>5</sup> and was prepared according to general procedure 3.1 (yellow oil, 0.26 g, 91% yield):  $^1\text{H}$  NMR (400 MHz,  $\text{DMSO}-d_6$ )  $\delta$  (ppm) 8.75 (d, 1H,  $J = 8$  Hz, ArH), 8.55 (d, 1H,  $J = 8$  Hz, ArH), 7.89–7.87 (m, 1H, ArH), 7.79–7.75 (m, 2H, ArH), 7.67–7.64 (m, 1H, ArH), 7.33–7.29 (m, 1H, ArH).

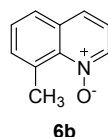

The compound is known<sup>5</sup> and was prepared according to general procedure 3.1 (yellow solid, mp.  $54^\circ\text{C}$ , 0.26 g, 81% yield):  $^1\text{H}$  NMR (400 MHz,  $\text{DMSO}-d_6$ )  $\delta$  (ppm) 8.43 (d, 1H,  $J = 8$  Hz, ArH), 7.87–7.82 (m, 2H, ArH), 7.53–7.45 (m, 2H, ArH), 7.39–7.36 (m, 1H, ArH), 3.07 (s, 3H,  $\text{CH}_3$ ).

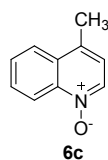

The compound is known<sup>5</sup> and was prepared according to general procedure 3.1 (yellow solid, mp.  $75^\circ\text{C}$ , 0.30 g, 95% yield):  $^1\text{H}$  NMR (400 MHz,  $\text{DMSO}-d_6$ )  $\delta$  (ppm) 8.59 (d, 1H,  $J = 8$  Hz, ArH), 8.48 (d, 1H,  $J = 8$  Hz, ArH), 8.12 (d, 1H,  $J = 4$  Hz, ArH), 7.84–7.77 (m, 2H, ArH), 7.33 (d, 1H,  $J = 4$  Hz, ArH), 2.63 (s, 3H,  $\text{CH}_3$ ).

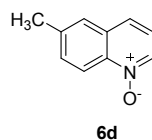

The compound is known<sup>5</sup> and was prepared according to general procedure 3.1 (yellow solid, mp.  $65^\circ\text{C}$ , 0.26 g, 83% yield):  $^1\text{H}$  NMR (400 MHz,  $\text{DMSO}-d_6$ )  $\delta$  (ppm) 8.51 (d, 1H,  $J = 8$  Hz, ArH), 8.43 (d, 1H,  $J = 8$  Hz, ArH), 7.84 (s, 1H, ArH), 7.83 (d, 1H,  $J = 8$  Hz, ArH), 7.65 (d, 1H,  $J = 8$  Hz, ArH), 7.45–7.41 (m, 1H, ArH), 3.33 (s, 3H,  $\text{CH}_3$ ).

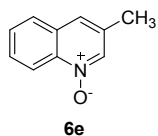

The compound is known <sup>6</sup> and was prepared according to general procedure 3.1 (yellow solid, mp. 52 °C, 0.29 g, 92% yield): <sup>1</sup>H NMR (400 MHz, DMSO-*d*<sub>6</sub>) δ (ppm) 8.55 (s, 1H, ArH), 8.50 (d, 1H, *J* = 8 Hz, ArH), 7.97 (d, 1H, *J* = 8 Hz, ArH), 7.77-7.67 (m, 3H, ArH), 2.41 (s, 3H, CH<sub>3</sub>).

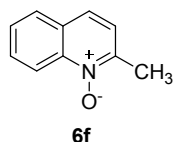

The compound is known <sup>6</sup> and was prepared according to general procedure 3.1 (yellow solid, mp. 70 °C, 0.29 g, 90% yield): <sup>1</sup>H NMR (400 MHz, DMSO-*d*<sub>6</sub>) δ (ppm) 8.56 (d, 1H, *J* = 8 Hz, ArH), 8.05 (d, 1H, *J* = 8 Hz, ArH), 7.86-7.78 (m, 2H, ArH), 7.70-7.66 (m, 1H, ArH), 7.59-7.57 (m, 1H, ArH), 2.58 (s, 3H, CH<sub>3</sub>).

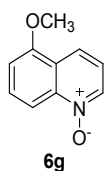

The compound is known <sup>7</sup> and was prepared according to general procedure 3.1 (yellow solid, mp. 101 °C, 0.30 g, 87% yield): <sup>1</sup>H NMR (400 MHz, DMSO-*d*<sub>6</sub>) δ (ppm) 8.58 (d, 1H, *J* = 4 Hz, ArH), 8.08 (d, 1H, *J* = 8 Hz, ArH), 8.02 (d, 1H, *J* = 8 Hz, ArH), 7.75-7.73 (m, 1H, ArH), 7.44-7.40 (m, 1H, ArH), 7.21 (d, 1H, *J* = 4 Hz, ArH), 4.02 (s, 3H, OCH<sub>3</sub>).

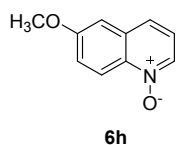

The compound is known <sup>5</sup> and was prepared according to general procedure 3.1 (yellow solid, mp. 89 °C, 0.30 g, 85% yield): <sup>1</sup>H NMR (400 MHz, DMSO-*d*<sub>6</sub>) δ (ppm) 8.45-8.41 (m, 2H, ArH), 7.82 (d, 1H, *J* = 8 Hz, ArH), 7.50 (d, 1H, *J* = 4 Hz, ArH), 7.44-7.40 (m, 2H, ArH), 3.92 (s, 3H, OCH<sub>3</sub>).

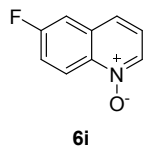

The compound is known <sup>5</sup> and was prepared according to general procedure 3.1 (yellow solid, mp. 109 °C, 0.26 g, 81% yield): <sup>1</sup>H NMR (400 MHz, DMSO-*d*<sub>6</sub>) δ (ppm) 8.80-8.76 (m, 1H, ArH), 8.49 (d, 1H, *J* = 4 Hz, ArH), 7.68 (d, 1H, *J* = 8 Hz, ArH), 7.54-7.49 (m, 2H, ArH), 7.35-7.28 (m, 1H, ArH).

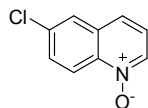

**6j**

The compound is known <sup>5</sup> and was prepared according to general procedure 3.1 (yellow solid, mp. 123 °C, 0.30 g, 83% yield): <sup>1</sup>H NMR (400 MHz, DMSO-*d*<sub>6</sub>) δ (ppm) 8.61 (d, 1H, *J* = 4 Hz, ArH), 8.53 (d, 1H, *J* = 8 Hz, ArH), 8.26 (s, 1H, ArH), 7.92-7.89 (m, 1H, ArH), 7.84 (d, 1H, *J* = 4 Hz, ArH), 7.55-7.52 (m, 1H, ArH).

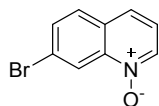

**6k**

The compound is known <sup>8</sup> and was prepared according to general procedure 3.1 (yellow solid, mp. 142 °C, 0.37 g, 82% yield): <sup>1</sup>H NMR (400 MHz, DMSO-*d*<sub>6</sub>) δ (ppm) 8.69 (s, 1H, ArH), 8.63 (d, 1H, *J* = 4 Hz, ArH), 8.08 (d, 1H, *J* = 8 Hz, ArH), 7.97 (d, 1H, *J* = 8 Hz, ArH), 7.92 (d, 1H, *J* = 4 Hz, ArH), 7.55-7.51 (m, 1H, ArH).

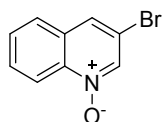

**6l**

The compound is known <sup>9</sup> and was prepared according to general procedure 3.1 (yellow solid, mp. 106 °C, 0.38 g, 85% yield): <sup>1</sup>H NMR (400 MHz, DMSO-*d*<sub>6</sub>) δ (ppm) 8.66 (s, 1H, ArH), 8.48 (d, 1H, *J* = 8 Hz, ArH), 8.29 (s, 1H, ArH), 8.05 (d, 1H, *J* = 8 Hz, ArH), 7.87-7.76 (m, 2H, ArH).

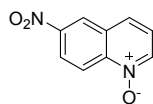

**6m**

The compound is known <sup>3</sup> and was prepared according to general procedure 3.1 (yellow solid, mp. 228 °C, 0.29 g, 75% yield): <sup>1</sup>H NMR (400 MHz, DMSO-*d*<sub>6</sub>) δ (ppm) 9.16 (d, 1H, *J* = 4 Hz, ArH), 8.78-8.70 (m, 2H, ArH), 8.50 (d, 1H, *J* = 4 Hz, ArH), 8.24 (d, 1H, *J* = 8 Hz, ArH), 7.69-7.65 (m, 1H, ArH).

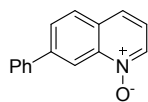

**6n**

The compound is known <sup>7</sup> and was prepared according to general procedure 3.1 (yellow solid, mp. 121 °C, 0.40 g, 91% yield): <sup>1</sup>H NMR (400 MHz, DMSO-*d*<sub>6</sub>) δ (ppm) 9.00 (s, 1H, ArH), 8.57 (d, 1H, *J* = 4 Hz, ArH), 7.93 (s, 2H, ArH), 7.80-7.75 (m, 3H, ArH), 7.53-7.49 (m, 2H, ArH), 7.45-7.41 (m, 1H, ArH), 7.31-7.27 (m, 1H, ArH).



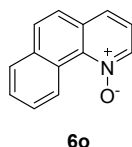

The compound is known <sup>5</sup> and was prepared according to general procedure 3.1 (yellow solid, mp. 95 °C, 0.36 g, 93% yield): <sup>1</sup>H NMR (400 MHz, DMSO-*d*<sub>6</sub>) δ (ppm) 10.87-10.85 (m, 1H, ArH), 8.68 (d, 1H, *J* = 8 Hz, ArH), 7.96-7.93 (m, 1H, ArH), 7.92-7.88 (m, 1H, ArH), 7.82-7.76 (m, 3H, ArH), 7.67 (d, 1H, *J* = 8 Hz, ArH), 7.44-7.40 (m, 1H, ArH).

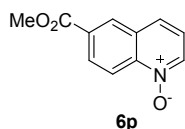

The compound is known <sup>6</sup> and was prepared according to general procedure 3.1 (yellow solid, mp. 139 °C, 0.31 g, 76% yield): <sup>1</sup>H NMR (400 MHz, DMSO-*d*<sub>6</sub>) δ (ppm) 8.78 (s, 1H, ArH), 8.71-8.70 (m, 1H, ArH), 8.64-8.61 (m, 1H, ArH), 8.26-8.24 (m, 1H, ArH), 8.16-8.14 (m, 1H, ArH), 7.60-7.56 (m, 1H, ArH), 3.95 (s, 3H, OCH<sub>3</sub>).

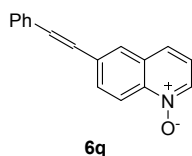

The compound is known <sup>10</sup> and was prepared according to general procedure 3.1 (yellow solid, mp. 138 °C, 0.37 g, 75% yield): <sup>1</sup>H NMR (400 MHz, DMSO-*d*<sub>6</sub>) δ (ppm) 8.74 (d, 1H, *J* = 12 Hz, ArH), 8.48 (d, 1H, *J* = 8 Hz, ArH), 8.01-7.99 (m, 1H, ArH), 7.85 (s, 1H, ArH), 7.73 (d, 1H, *J* = 12 Hz, ArH), 7.58-7.56 (m, 2H, ArH), 7.42-7.39 (m, 2H, ArH), 7.34-7.25 (m, 4H, ArH+2CH).

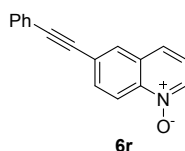

The compound is known <sup>11</sup> and was prepared according to general procedure 3.1 (yellow solid, mp. 128 °C, 0.43 g, 87% yield): <sup>1</sup>H NMR (400 MHz, DMSO-*d*<sub>6</sub>) δ (ppm) 8.63 (d, 1H, *J* = 4 Hz, ArH), 8.56 (d, 1H, *J* = 8 Hz, ArH), 8.36 (s, 1H, ArH), 7.97-7.92 (m, 2H, ArH), 7.65-7.64 (m, 2H, ArH), 7.55-7.49 (m, 4H, ArH).

### 3.2 General procedure for the copper-catalyzed carbamoylation of quinoline *N*-oxide

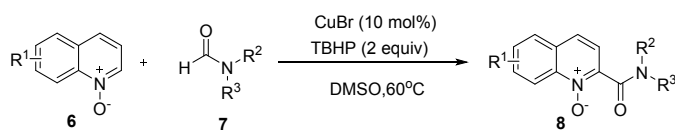

To a reaction tube were added quinoline *N*-oxides **6** (0.2 mmol) and formamide **7** (10 equiv), CuBr (10 mol %), TBHP (5.0–6.0 M in decane) (2 equiv) and DMSO (1 mL). Then the

tube was charged with air, and was stirred at 60 °C until complete consumption of starting material as monitored by TLC and GC–MS analysis. After the reaction was finished, the reaction mixture was washed with brine. The aqueous phase was re-extracted with ethyl acetate. The combined organic extracts were dried over Na<sub>2</sub>SO<sub>4</sub>, concentrated in vacuum, and the resulting residue was purified by silica gel column chromatography to afford the desired quinoline-*N*-oxide-2-carboxamides **8**.

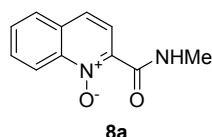

The compound is known<sup>12</sup> and was prepared according to general procedure 3.2 (yellow oil, **36 mg, 91% yield**): <sup>1</sup>H NMR (400 MHz, CDCl<sub>3</sub>) δ (ppm) 11.45 (s, 1H, NH), 8.79 (d, 1H, *J* = 8 Hz, ArH), 8.44 (d, 1H, *J* = 12 Hz, ArH), 7.91 (d, 1H, *J* = 8 Hz, ArH), 7.87–7.81 (m, 2H, ArH), 7.74–7.70 (m, 1H, ArH), 3.12 (d, 3H, *J* = 4 Hz, CH<sub>3</sub>); <sup>13</sup>C NMR (100 MHz, CDCl<sub>3</sub>) δ (ppm) 161.2, 131.1, 130.7, 129.8, 128.2, 126.5, 122.7, 120.2, 26.3.

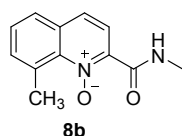

The compound was prepared according to general procedure 3.2 and purified by flash column chromatography (2:1 petroleum ether: ethyl acetate) to afford **8b** (yellow oil, **36 mg, 85% yield**): <sup>1</sup>H NMR (400 MHz, CDCl<sub>3</sub>) δ (ppm) 11.37 (s, 1H, NH), 8.35 (d, 1H, *J* = 8 Hz, ArH), 7.74 (d, 1H, *J* = 12 Hz, ArH), 7.69–7.67 (m, 1H, ArH), 7.53–7.48 (m, 2H, ArH), 3.17 (s, 3H, CH<sub>3</sub>), 3.09 (d, 3H, *J* = 8 Hz, CH<sub>3</sub>); <sup>13</sup>C NMR (100 MHz, CDCl<sub>3</sub>) δ (ppm) 161.6, 141.7, 138.4, 134.3, 132.6, 129.2, 126.9, 126.7, 122.6, 26.2, 25.7; HRMS (ESI–Q–TOF) exact mass calcd for C<sub>12</sub>H<sub>13</sub>N<sub>2</sub>O<sub>2</sub> [M + H]<sup>+</sup> 217.0977, found 217.0994.

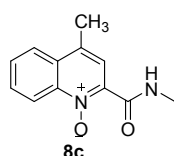

The compound is known<sup>12</sup> and was prepared according to general procedure 3.2 (yellow oil, **39 mg, 90% yield**): <sup>1</sup>H NMR (400 MHz, CDCl<sub>3</sub>) δ (ppm) 11.60 (s, 1H, NH), 8.43 (d, 1H, *J* = 8 Hz, ArH), 8.26 (s, 1H, ArH), 8.01 (d, 1H, *J* = 8 Hz, ArH), 7.85–7.81 (m, 1H, ArH), 7.77–7.73 (m, 1H, ArH), 3.11 (d, 3H, *J* = 4 Hz, CH<sub>3</sub>), 2.72 (s, 3H, CH<sub>3</sub>); <sup>13</sup>C NMR (100 MHz, CDCl<sub>3</sub>) δ (ppm)

161.3, 141.3, 136.6, 135.2, 130.7, 130.3, 129.5, 124.8, 122.8, 120.6, 26.3, 18.4.

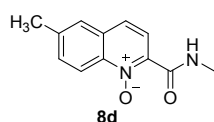

The compound was prepared according to general procedure 3.2 and purified by flash column chromatography (2:1 petroleum ether: ethyl acetate) to afford **8d** (yellow oil, **39 mg, 92% yield**):  $^1\text{H}$  NMR (400 MHz,  $\text{CDCl}_3$ )  $\delta$  (ppm) 11.50 (s, 1H, NH), 8.65 (d, 1H,  $J = 8$  Hz, ArH), 8.38 (d, 1H,  $J = 8$  Hz, ArH), 7.75 (d, 1H,  $J = 8$  Hz, ArH), 7.65–7.63 (m, 2H, ArH), 3.10 (d, 3H,  $J = 8$  Hz,  $\text{CH}_3$ ), 2.56 (s, 3H,  $\text{CH}_3$ );  $^{13}\text{C}$  NMR (100 MHz,  $\text{CDCl}_3$ )  $\delta$  (ppm) 161.3, 140.3, 136.8, 133.3, 130.9, 127.1, 126.0, 122.7, 119.9, 26.3, 21.5; HRMS (ESI–Q–TOF) exact mass calcd for  $\text{C}_{12}\text{H}_{13}\text{N}_2\text{O}_2$   $[\text{M} + \text{H}]^+$  217.0977, found 217.0959.

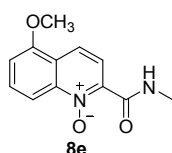

The compound was prepared according to general procedure 3.2 and purified by flash column chromatography (2:1 petroleum ether: ethyl acetate) to afford **8e** (yellow solid, mp. 171 °C, **39 mg, 85% yield**):  $^1\text{H}$  NMR (400 MHz,  $\text{CDCl}_3$ )  $\delta$  (ppm) 11.50 (s, 1H, NH), 8.38 (d, 1H,  $J = 8$  Hz, ArH), 8.32 (d, 1H,  $J = 12$  Hz, ArH), 8.24 (d, 1H,  $J = 8$  Hz, ArH), 7.74–7.70 (m, 1H, ArH), 7.02 (d, 1H,  $J = 8$  Hz, ArH), 4.04 (s, 3H,  $\text{OCH}_3$ ), 3.11 (d, 3H,  $J = 4$  Hz,  $\text{CH}_3$ );  $^{13}\text{C}$  NMR (100 MHz,  $\text{CDCl}_3$ )  $\delta$  (ppm) 164.6, 161.2, 155.7, 142.6, 137.7, 131.4, 123.4, 121.5, 111.6, 107.5, 56.2, 26.3; HRMS (ESI–Q–TOF) exact mass calcd for  $\text{C}_{12}\text{H}_{13}\text{N}_2\text{O}_3$   $[\text{M} + \text{H}]^+$  233.0926, found 233.0927.

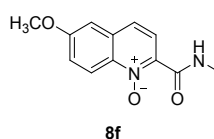

The compound was prepared according to general procedure 3.2 and purified by flash column chromatography (2:1 petroleum ether: ethyl acetate) to afford **8f** (yellow solid, mp. 152 °C, **39 mg, 85% yield**):  $^1\text{H}$  NMR (400 MHz,  $\text{CDCl}_3$ )  $\delta$  (ppm) 11.30 (s, 1H, NH), 8.58 (d, 1H,  $J = 8$  Hz, ArH), 8.29 (d, 1H,  $J = 8$  Hz, ArH), 7.64 (d, 1H,  $J = 8$  Hz, ArH), 7.34 (d, 1H,  $J = 8$  Hz, ArH), 7.03 (s, 1H, ArH), 3.88 (s, 3H,  $\text{OCH}_3$ ), 3.02 (d, 3H,  $J = 4$  Hz,  $\text{CH}_3$ );  $^{13}\text{C}$  NMR (100 MHz,  $\text{CDCl}_3$ )  $\delta$  (ppm) 160.3, 159.3, 136.2, 134.8, 131.4, 124.5, 122.5, 122.3, 120.8, 104.8, 54.8, 25.3; HRMS (ESI–Q–TOF) exact mass calcd for  $\text{C}_{12}\text{H}_{13}\text{N}_2\text{O}_3$   $[\text{M} + \text{H}]^+$  233.0926, found 233.0927.

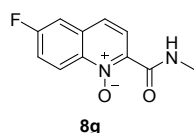

The compound was prepared according to general procedure 3.2 and purified by flash column chromatography (2:1 petroleum ether: ethyl acetate) to afford **8g** (yellow oil, **36 mg, 83% yield**):  $^1\text{H}$  NMR (400 MHz,  $\text{CDCl}_3$ )  $\delta$  (ppm) 11.25 (s, 1H, NH), 8.81–8.78 (m, 1H, ArH), 8.44 (d, 1H,  $J = 8$  Hz, ArH), 7.78 (d, 1H,  $J = 12$  Hz, ArH), 7.58–7.51 (m, 2H, ArH), 3.11 (d, 3H,  $J = 4$  Hz,  $\text{CH}_3$ );  $^{13}\text{C}$  NMR (100 MHz,  $\text{CDCl}_3$ )  $\delta$  (ppm) 163.8, 161.3, 160.9, 138.8, 137.1, 132.1, 125.6, 124.0, 123.5, 121.1, 120.8, 111.9, 26.3; HRMS (ESI–Q–TOF) exact mass calcd for  $\text{C}_{11}\text{H}_{10}\text{FN}_2\text{O}_2$   $[\text{M} + \text{H}]^+$  221.0726, found 221.0708.

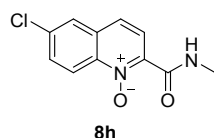

The compound was prepared according to general procedure 3.2 and purified by flash column chromatography (2:1 petroleum ether: ethyl acetate) to afford **8h** (yellow oil, **41 mg, 88% yield**):  $^1\text{H}$  NMR (400 MHz,  $\text{CDCl}_3$ )  $\delta$  (ppm) 11.30 (s, 1H, NH), 8.70 (d, 1H,  $J = 8$  Hz, ArH), 8.44 (d, 1H,  $J = 8$  Hz, ArH), 7.87 (s, 1H, ArH), 7.75–7.71 (m, 2H, ArH), 3.11 (d, 3H,  $J = 4$  Hz,  $\text{CH}_3$ );  $^{13}\text{C}$  NMR (100 MHz,  $\text{CDCl}_3$ )  $\delta$  (ppm) 160.8, 140.3, 137.6, 136.3, 131.9, 131.4, 126.9, 125.3, 124.0, 122.1, 26.4; HRMS (ESI–Q–TOF) exact mass calcd for  $\text{C}_{11}\text{H}_{10}\text{ClN}_2\text{O}_2$   $[\text{M} + \text{H}]^+$  237.0431, found 237.0421.

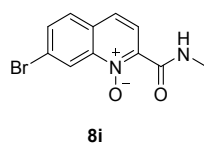

The compound was prepared according to general procedure 3.2 and purified by flash column chromatography (2:1 petroleum ether: ethyl acetate) to afford **8i** (yellow solid, mp. 148 °C, **46 mg, 83% yield**):  $^1\text{H}$  NMR (400 MHz,  $\text{CDCl}_3$ )  $\delta$  (ppm) 11.30 (s, 1H, NH), 8.96 (s, 1H, ArH), 8.43 (d, 1H,  $J = 8$  Hz, ArH), 7.81–7.75 (m, 3H, ArH), 3.11 (d, 3H,  $J = 8$  Hz,  $\text{CH}_3$ );  $^{13}\text{C}$  NMR (100 MHz,  $\text{CDCl}_3$ )  $\delta$  (ppm) 160.7, 142.2, 138.0, 133.4, 129.4, 129.3, 126.0, 125.8, 123.1, 123.0, 26.4; HRMS (ESI–Q–TOF) exact mass calcd for  $\text{C}_{11}\text{H}_{10}\text{BrN}_2\text{O}_2$   $[\text{M} + \text{H}]^+$  280.9926, found 280.9924.

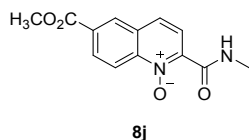

The compound was prepared according to general procedure 3.2 and purified by flash column chromatography (2:1 petroleum ether: ethyl acetate) to afford **8j** (yellow solid, mp. 175 °C, **41 mg, 80% yield**): <sup>1</sup>H NMR (400 MHz, CDCl<sub>3</sub>) δ (ppm) 11.33 (s, 1H, NH), 8.82 (d, 1H, *J* = 8 Hz, ArH), 8.62 (s, 1H, ArH), 8.49 (d, 1H, *J* = 8 Hz, ArH), 8.38 (d, 1H, *J* = 8 Hz, ArH), 7.94 (d, 1H, *J* = 8 Hz, ArH), 4.03 (s, 3H, OCH<sub>3</sub>), 3.12 (s, 3H, CH<sub>3</sub>); <sup>13</sup>C NMR (100 MHz, CDCl<sub>3</sub>) δ (ppm) 165.5, 160.8, 143.5, 138.8, 131.3, 130.8, 130.6, 130.2, 127.0, 123.6, 120.8, 52.8, 26.4; HRMS (ESI-Q-TOF) exact mass calcd for C<sub>13</sub>H<sub>13</sub>N<sub>2</sub>O<sub>4</sub> [M + H]<sup>+</sup> 261.0875, found **261.0878**.

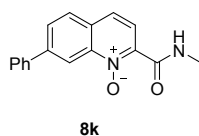

The compound was prepared according to general procedure 3.2 and purified by flash column chromatography (2:1 petroleum ether: ethyl acetate) to afford **8k** (yellow solid, mp. 178 °C, **49 mg, 88% yield**): <sup>1</sup>H NMR (400 MHz, CDCl<sub>3</sub>) δ (ppm) 11.47 (s, 1H, NH), 9.01 (s, 1H, ArH), 8.42 (d, 1H, *J* = 8 Hz, ArH), 7.99–7.94 (m, 2H, ArH), 7.85 (d, 1H, *J* = 8 Hz, ArH), 7.79–7.77 (m, 2H, ArH), 7.54–7.51 (m, 2H, ArH), 7.47–7.43 (m, 1H, ArH), 3.12 (d, 3H, *J* = 4 Hz, CH<sub>3</sub>); <sup>13</sup>C NMR (100 MHz, CDCl<sub>3</sub>) δ (ppm) 161.2, 144.2, 142.2, 139.2, 129.8, 129.3, 129.2, 128.7, 127.6, 126.2, 122.5, 117.6, 26.3; HRMS (ESI-Q-TOF) exact mass calcd for C<sub>17</sub>H<sub>15</sub>N<sub>2</sub>O<sub>2</sub> [M + H]<sup>+</sup> 279.1133, found 279.1115.

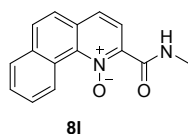

The compound was prepared according to general procedure 3.2 and purified by flash column chromatography (2:1 petroleum ether: ethyl acetate) to afford **8l** (yellow oil, **40 mg, 80% yield**): <sup>1</sup>H NMR (400 MHz, CDCl<sub>3</sub>) δ (ppm) 11.49 (s, 1H, NH), 10.66–10.64 (m, 1H, ArH), 8.63 (d, 1H, *J* = 8 Hz, ArH), 8.00–7.97 (m, 1H, ArH), 7.95 (d, 1H, *J* = 8 Hz, ArH), 7.89 (d, 1H, *J* = 8 Hz, ArH), 7.83–7.79 (m, 2H, ArH), 7.69 (d, 1H, *J* = 8 Hz, ArH), 3.15 (d, 3H, *J* = 8 Hz, CH<sub>3</sub>); <sup>13</sup>C NMR (100 MHz, CDCl<sub>3</sub>) δ (ppm) 161.7, 134.7, 132.2, 132.0, 129.3, 128.7, 128.5, 128.2, 126.3, 126.2, 124.9, 124.2, 26.4; HRMS (ESI-Q-TOF) exact mass calcd for C<sub>15</sub>H<sub>13</sub>N<sub>2</sub>O<sub>2</sub> [M +

$\text{H}]^+ 253.0977$ , found **253.0962**.

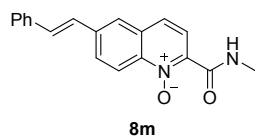

The compound was prepared according to general procedure 3.2 and purified by flash column chromatography (2:1 petroleum ether: ethyl acetate) to afford **8m** (yellow solid, mp. 175 °C, 49 mg, 81% yield):  $^1\text{H}$  NMR (400 MHz,  $\text{CDCl}_3$ )  $\delta$  (ppm) 11.42 (s, 1H, NH), 8.73 (d, 1H,  $J = 8$  Hz, ArH), 8.41 (d, 1H,  $J = 8$  Hz, ArH), 8.04–8.02 (m, 1H, ArH), 7.85–7.80 (m, 2H, ArH), 7.58–7.56 (m, 2H, ArH), 7.43–7.39 (m, 2H, ArH), 7.35–7.25 (m, 3H, ArH+2CH), 3.11 (d, 3H,  $J = 4$  Hz,  $\text{CH}_3$ );  $^{13}\text{C}$  NMR (100 MHz,  $\text{CDCl}_3$ )  $\delta$  (ppm) 161.2, 141.0, 139.0, 136.4, 132.6, 131.3, 129.0, 128.9, 128.7, 126.9, 126.4, 125.6, 123.2, 120.5, 26.3; HRMS (ESI–Q–TOF) exact mass calcd for  $\text{C}_{19}\text{H}_{17}\text{N}_2\text{O}_2$   $[\text{M} + \text{H}]^+ 305.1290$ , found **305.1291**.

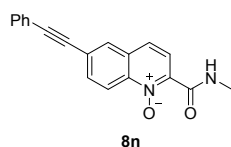

The compound was prepared according to general procedure 3.2 and purified by flash column chromatography (2:1 petroleum ether: ethyl acetate) to afford **8n** (yellow solid, mp. 185 °C, **46 mg, 77%** yield):  $^1\text{H}$  NMR (400 MHz,  $\text{CDCl}_3$ )  $\delta$  (ppm) 11.34 (s, 1H, NH), 8.73 (d, 1H,  $J = 12$  Hz, ArH), 8.42 (d, 1H,  $J = 8$  Hz, ArH), 8.03 (s, 1H, ArH), 7.88 (d, 1H,  $J = 8$  Hz, ArH), 7.78 (d, 1H,  $J = 8$  Hz, ArH), 7.58–7.56 (m, 2H, ArH), 7.41–7.38 (m, 3H, ArH), 3.10 (d, 3H,  $J = 4$  Hz,  $\text{CH}_3$ );  $^{13}\text{C}$  NMR (100 MHz,  $\text{CDCl}_3$ )  $\delta$  (ppm) 161.0, 140.9, 137.7, 133.8, 131.8, 130.9, 130.6, 129.1, 128.5, 125.9, 125.4, 123.5, 122.3, 120.4, 93.1, 87.7, 26.3; HRMS (ESI–Q–TOF) exact mass calcd for  $\text{C}_{19}\text{H}_{15}\text{N}_2\text{O}_2$   $[\text{M} + \text{H}]^+ 303.1133$ , found **303.1128**.

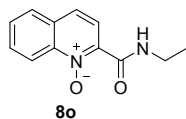

The compound was prepared according to general procedure 3.2 and purified by flash column chromatography (2:1 petroleum ether: ethyl acetate) to afford **8o** (yellow oil, 35 mg, 81% yield):  $^1\text{H}$  NMR (400 MHz,  $\text{CDCl}_3$ )  $\delta$  (ppm) 11.49 (s, 1H, NH), 8.78 (d, 1H,  $J = 8$  Hz, ArH), 8.43 (d, 1H,  $J = 8$  Hz, ArH), 7.90 (d, 1H,  $J = 8$  Hz, ArH), 7.86–7.81 (m, 2H, ArH), 7.74–7.70 (m, 1H, ArH), 3.63–3.56 (m, 2H,  $\text{CH}_2$ ), 1.34 (t, 3H,  $J = 8$  Hz,  $\text{CH}_3$ );  $^{13}\text{C}$  NMR (100 MHz,

CDCl<sub>3</sub>)  $\delta$  (ppm) 160.3, 141.8, 137.6, 131.1, 130.7, 129.7, 128.2, 126.5, 122.7, 120.1, 34.7, 14.7; HRMS (ESI-Q-TOF) exact mass calcd for C<sub>12</sub>H<sub>13</sub>N<sub>2</sub>O<sub>2</sub> [M + H]<sup>+</sup> 217.0977, found 217.0977.

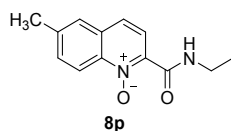

The compound was prepared according to general procedure 3.2 and purified by flash column chromatography (2:1 petroleum ether: ethyl acetate) to afford **8p** (yellow oil, 36 mg, 79% yield): <sup>1</sup>H NMR (400 MHz, CDCl<sub>3</sub>)  $\delta$  (ppm) 11.40 (s, 1H, NH), 8.58 (d, 1H, *J* = 8 Hz, ArH), 8.31 (d, 1H, *J* = 8 Hz, ArH), 7.69 (d, 1H, *J* = 8 Hz, ArH), 7.58–7.56 (m, 2H, ArH), 3.55–3.48 (m, 2H, CH<sub>2</sub>), 2.49 (s, 3H, CH<sub>3</sub>), 1.25 (t, 3H, *J* = 8 Hz, CH<sub>3</sub>); <sup>13</sup>C NMR (100 MHz, CDCl<sub>3</sub>)  $\delta$  (ppm) 160.4, 140.3, 137.0, 133.4, 130.9, 127.2, 126.1, 122.8, 119.8, 34.6, 21.5, 14.7; HRMS (ESI-Q-TOF) exact mass calcd for C<sub>13</sub>H<sub>15</sub>N<sub>2</sub>O<sub>2</sub> [M + H]<sup>+</sup> 231.1134, found 231.1143.

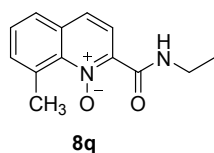

The compound was prepared according to general procedure 3.2 and purified by flash column chromatography (2:1 petroleum ether: ethyl acetate) to afford **8q** (yellow oil, 36 mg, 80% yield): <sup>1</sup>H NMR (400 MHz, CDCl<sub>3</sub>)  $\delta$  (ppm) 11.40 (s, 1H, NH), 8.34 (d, 1H, *J* = 8 Hz, ArH), 7.72 (d, 1H, *J* = 8 Hz, ArH), 7.68–7.65 (m, 1H, ArH), 7.51–7.47 (m, 2H, ArH), 3.61–3.54 (m, 2H, CH<sub>2</sub>), 3.16 (s, 3H, CH<sub>3</sub>), 1.32 (t, 3H, *J* = 8 Hz, CH<sub>3</sub>); <sup>13</sup>C NMR (100 MHz, CDCl<sub>3</sub>)  $\delta$  (ppm) 160.8, 141.8, 138.5, 134.3, 132.6, 129.1, 126.9, 122.7, 34.6, 25.7, 14.7; HRMS (ESI-Q-TOF) exact mass calcd for C<sub>13</sub>H<sub>15</sub>N<sub>2</sub>O<sub>2</sub> [M + H]<sup>+</sup> 231.1134, found 231.1143.

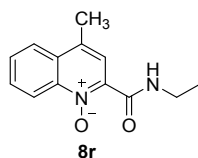

The compound was prepared according to general procedure 3.2 and purified by flash column chromatography (2:1 petroleum ether: ethyl acetate) to afford **8r** (yellow solid, mp. 88 °C, 39 mg, 85% yield): <sup>1</sup>H NMR (400 MHz, CDCl<sub>3</sub>)  $\delta$  (ppm) 11.70 (s, 1H, NH), 8.85–8.83 (m, 1H, ArH), 8.27 (s, 1H, ArH), 8.02 (d, 1H, *J* = 8 Hz, ArH), 7.86–7.82 (m, 1H, ArH), 7.77–7.73 (m, 1H, ArH), 3.63–3.56 (m, 2H, CH<sub>2</sub>), 2.73 (s, 3H, CH<sub>3</sub>), 1.33 (t, 3H, *J* = 8 Hz, CH<sub>3</sub>); <sup>13</sup>C NMR (100 MHz, CDCl<sub>3</sub>)  $\delta$  (ppm) 160.4, 141.3, 135.3, 130.8, 130.3, 129.5, 124.9, 122.8, 120.6, 34.7,

18.4, 14.7; HRMS (ESI-Q-TOF) exact mass calcd for C<sub>13</sub>H<sub>15</sub>N<sub>2</sub>O<sub>2</sub> [M + H]<sup>+</sup> 231.1134, found 231.1121.

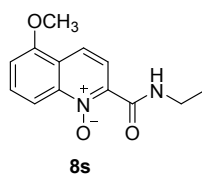

The compound was prepared according to general procedure 3.2 and purified by flash column chromatography (2:1 petroleum ether: ethyl acetate) to afford **8s** (yellow solid, mp. 155 °C, 39 mg, 80% yield): <sup>1</sup>H NMR (400 MHz, CDCl<sub>3</sub>) δ (ppm) 11.50 (s, 1H, NH), 8.38 (d, 1H, *J* = 8 Hz, ArH), 8.32 (d, 1H, *J* = 12 Hz, ArH), 8.24 (d, 1H, *J* = 8 Hz, ArH), 7.74–7.70 (m, 1H, ArH), 7.02 (d, 1H, *J* = 8 Hz, ArH), 4.04 (s, 3H, OCH<sub>3</sub>), 3.62–3.55 (m, 2H, CH<sub>2</sub>), 1.33 (t, 3H, *J* = 8 Hz, CH<sub>3</sub>); <sup>13</sup>C NMR (100 MHz, CDCl<sub>3</sub>) δ (ppm) 160.4, 155.7, 142.7, 137.9, 131.4, 123.5, 121.6, 121.5, 111.6, 107.5, 56.2, 34.7, 14.7; HRMS (ESI-Q-TOF) exact mass calcd for C<sub>13</sub>H<sub>14</sub>N<sub>2</sub>O<sub>3</sub> [M + H]<sup>+</sup> 247.1083, found 247.1100.

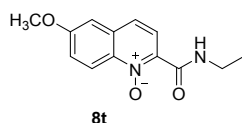

The compound was prepared according to general procedure 3.2 and purified by flash column chromatography (2:1 petroleum ether: ethyl acetate) to afford **8t** (yellow oil, 36 mg, 75% yield): <sup>1</sup>H NMR (400 MHz, CDCl<sub>3</sub>) δ (ppm) 11.40 (s, 1H, NH), 8.68 (d, 1H, *J* = 12 Hz, ArH), 8.38 (d, 1H, *J* = 8 Hz, ArH), 7.74 (d, 1H, *J* = 12 Hz, ArH), 7.45 (d, 1H, *J* = 4 Hz, ArH), 7.12 (s, 1H, ArH), 3.97 (s, 3H, OCH<sub>3</sub>), 3.61–3.55 (m, 2H, CH<sub>2</sub>), 1.32 (t, 3H, *J* = 8 Hz, CH<sub>3</sub>); <sup>13</sup>C NMR (100 MHz, CDCl<sub>3</sub>) δ (ppm) 160.4, 137.2, 135.9, 132.4, 125.5, 123.5, 123.4, 121.8, 105.9, 55.9, 34.6, 14.7; HRMS (ESI-Q-TOF) exact mass calcd for C<sub>13</sub>H<sub>15</sub>N<sub>2</sub>O<sub>3</sub> [M + H]<sup>+</sup> 247.1083, found 247.1080.

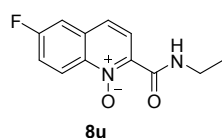

The compound was prepared according to general procedure 3.2 and purified by flash column chromatography (2:1 petroleum ether: ethyl acetate) to afford **8u** (yellow oil, 33 mg, 71% yield): <sup>1</sup>H NMR (400 MHz, CDCl<sub>3</sub>) δ (ppm) 11.30 (s, 1H, NH), 8.82–8.79 (m, 1H, ArH), 8.45 (d, 1H, *J* = 8 Hz, ArH), 7.78 (d, 1H, *J* = 8 Hz, ArH), 7.59–7.51 (m, 2H, ArH), 3.62–3.55 (m,



2H, CH<sub>2</sub>), 1.33 (t, 3H, *J* = 8 Hz, CH<sub>3</sub>); <sup>13</sup>C NMR (100 MHz, CDCl<sub>3</sub>) δ (ppm) 163.8, 161.2, 160.0, 138.8, 137.2, 132.1, 125.6, 124.1, 123.4, 121.1, 120.8, 111.9, 34.7, 14.6; HRMS (ESI–Q–TOF) exact mass calcd for C<sub>12</sub>H<sub>12</sub>FN<sub>2</sub>O<sub>2</sub> [M + H]<sup>+</sup> 235.0833, found 235.0831.

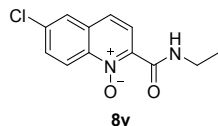

The compound was prepared according to general procedure 3.2 and purified by flash column chromatography (2:1 petroleum ether: ethyl acetate) to afford **8v** (yellow solid, mp. 139 °C, **37 mg, 75% yield**): <sup>1</sup>H NMR (400 MHz, CDCl<sub>3</sub>) δ (ppm) 11.30 (s, 1H, NH), 8.72 (d, 1H, *J* = 12 Hz, ArH), 8.45 (d, 1H, *J* = 8 Hz, ArH), 7.89 (s, 1H, ArH), 7.76–7.73 (m, 2H, ArH), 3.62–3.55 (m, 2H, CH<sub>2</sub>), 1.34 (t, 3H, *J* = 8 Hz, CH<sub>3</sub>); <sup>13</sup>C NMR (100 MHz, CDCl<sub>3</sub>) δ (ppm) 160.2, 140.3, 137.8, 136.3, 131.9, 131.5, 128.8, 127.8, 127.5, 126.9, 125.3, 124.2, 122.1, 43.9, 29.3; HRMS (ESI–Q–TOF) exact mass calcd for C<sub>12</sub>H<sub>12</sub>ClN<sub>2</sub>O<sub>2</sub> [M + H]<sup>+</sup> 251.0587, found **251.0591**.

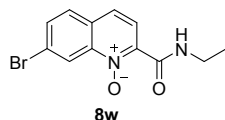

The compound was prepared according to general procedure 3.2 and purified by flash column chromatography (2:1 petroleum ether: ethyl acetate) to afford **8w** (yellow solid, mp. 125 °C, **46 mg, 77% yield**): <sup>1</sup>H NMR (400 MHz, CDCl<sub>3</sub>) δ (ppm) 11.30 (s, 1H, NH), 8.96 (s, 1H, ArH), 8.43 (d, 1H, *J* = 8 Hz, ArH), 7.82–7.75 (m, 3H, ArH), 3.62–3.56 (m, 2H, CH<sub>2</sub>), 1.33 (t, 3H, *J* = 8 Hz, CH<sub>3</sub>); <sup>13</sup>C NMR (100 MHz, CDCl<sub>3</sub>) δ (ppm) 159.8, 142.1, 138.1, 133.4, 129.4, 129.3, 126.0, 125.8, 123.1, 123.0, 34.7, 14.6; HRMS (ESI–Q–TOF) exact mass calcd for C<sub>12</sub>H<sub>12</sub>BrN<sub>2</sub>O<sub>2</sub> [M + H]<sup>+</sup> 295.0082, found 295.0066.

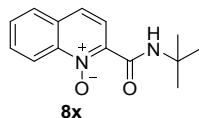

The compound was prepared according to general procedure 3.2 and purified by flash column chromatography (2:1 petroleum ether: ethyl acetate) to afford **8x** (yellow solid, mp. 115 °C, **34 mg, 73% yield**): <sup>1</sup>H NMR (400 MHz, CDCl<sub>3</sub>) δ (ppm) 11.60 (s, 1H, NH), 8.78 (d, 1H, *J* = 8 Hz, ArH), 8.42 (d, 1H, *J* = 8 Hz, ArH), 7.91–7.81 (m, 3H, ArH), 7.73–7.69 (m, 1H, ArH), 1.55 (s, 9H, 3CH<sub>3</sub>); <sup>13</sup>C NMR (100 MHz, CDCl<sub>3</sub>) δ (ppm) 159.0, 141.7, 138.5, 131.1, 130.6, 129.6, 128.2, 126.6, 122.5, 120.0, 51.5, 28.7; HRMS (ESI–Q–TOF) exact mass calcd for C<sub>14</sub>H<sub>17</sub>N<sub>2</sub>O<sub>2</sub>

$[M + H]^+$  245.1290, found 245.1270.

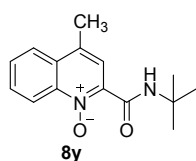

The compound was prepared according to general procedure 3.2 and purified by flash column chromatography (2:1 petroleum ether: ethyl acetate) to afford **8y** (yellow solid, mp. 126 °C, 37 mg, 71% yield):  $^1\text{H}$  NMR (400 MHz,  $\text{CDCl}_3$ )  $\delta$  (ppm) 11.80 (s, 1H, NH), 8.43 (d, 1H,  $J = 8$  Hz, ArH), 8.26 (s, 1H, ArH), 8.01 (d, 1H,  $J = 8$  Hz, ArH), 7.86–7.81 (m, 1H, ArH), 7.76–7.72 (m, 1H, ArH), 2.71 (s, 3H,  $\text{CH}_3$ ), 1.54 (s, 9H, 3 $\text{CH}_3$ );  $^{13}\text{C}$  NMR (100 MHz,  $\text{CDCl}_3$ )  $\delta$  (ppm) 159.1, 141.2, 137.7, 135.4, 130.8, 130.3, 129.4, 124.8, 122.7, 120.6, 51.5, 28.7, 18.4; HRMS (ESI–Q–TOF) exact mass calcd for  $\text{C}_{15}\text{H}_{19}\text{N}_2\text{O}_2$   $[M + H]^+$  259.1447, found 259.1466.

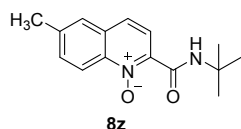

The compound was prepared according to general procedure 3.2 and purified by flash column chromatography (2:1 petroleum ether: ethyl acetate) to afford **8z** (yellow solid, mp. 115 °C, 37 mg, 72% yield):  $^1\text{H}$  NMR (400 MHz,  $\text{CDCl}_3$ )  $\delta$  (ppm) 11.50 (s, 1H, NH), 8.56 (d, 1H,  $J = 8$  Hz, ArH), 8.29 (d, 1H,  $J = 8$  Hz, ArH), 7.68 (d, 1H,  $J = 8$  Hz, ArH), 7.56–7.54 (m, 2H, ArH), 2.48 (s, 3H,  $\text{CH}_3$ ), 1.46 (s, 9H, 3 $\text{CH}_3$ );  $^{13}\text{C}$  NMR (100 MHz,  $\text{CDCl}_3$ )  $\delta$  (ppm) 159.1, 140.2, 137.8, 133.3, 130.8, 127.1, 126.2, 122.5, 119.8, 51.4, 28.7, 21.4; HRMS (ESI–Q–TOF) exact mass calcd for  $\text{C}_{15}\text{H}_{18}\text{N}_2\text{O}_2$   $[M + H]^+$  259.1447, found 259.1462.

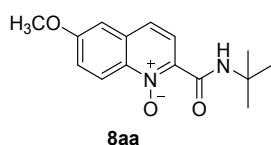

The compound was prepared according to general procedure 3.2 and purified by flash column chromatography (2:1 petroleum ether: ethyl acetate) to afford **8aa** (yellow oil, 43 mg, 79% yield):  $^1\text{H}$  NMR (400 MHz,  $\text{CDCl}_3$ )  $\delta$  (ppm) 11.55 (s, 1H, NH), 8.67 (d, 1H,  $J = 8$  Hz, ArH), 8.37 (d, 1H,  $J = 4$  Hz, ArH), 7.74 (d, 1H,  $J = 4$  Hz, ArH), 7.43 (d, 1H,  $J = 8$  Hz, ArH), 7.12 (s, 1H, ArH), 3.97 (s, 3H,  $\text{OCH}_3$ ), 1.53 (s, 9H, 3 $\text{CH}_3$ );  $^{13}\text{C}$  NMR (100 MHz,  $\text{CDCl}_3$ )  $\delta$  (ppm) 160.2, 159.2, 137.2, 136.8, 132.4, 125.7, 123.5, 123.1, 121.7, 105.9, 55.8, 51.4, 50.2, 29.6, 28.7; HRMS (ESI–Q–TOF) exact mass calcd for  $\text{C}_{15}\text{H}_{19}\text{N}_2\text{O}_3$   $[M + H]^+$  275.1396, found 275.1379.

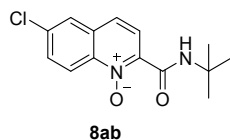

The compound was prepared according to general procedure 3.2 and purified by flash column chromatography (2:1 petroleum ether: ethyl acetate) to afford **8ab** (yellow solid, mp. 118 °C, **38 mg, 69%** yield): <sup>1</sup>H NMR (400 MHz, CDCl<sub>3</sub>) δ (ppm) 11.40 (s, 1H, NH), 8.72 (d, 1H, *J* = 8 Hz, ArH), 8.44 (d, 1H, *J* = 8 Hz, ArH), 7.88 (s, 1H, ArH), 7.76–7.73 (m, 2H, ArH), 1.54 (s, 9H, 3CH<sub>3</sub>); <sup>13</sup>C NMR (100 MHz, CDCl<sub>3</sub>) δ (ppm) 158.6, 140.2, 138.6, 136.1, 131.9, 131.4, 126.9, 125.3, 123.9, 122.0, 51.6, 28.7; HRMS (ESI–Q–TOF) exact mass calcd for C<sub>14</sub>H<sub>16</sub>ClN<sub>2</sub>O<sub>2</sub> [M + H]<sup>+</sup> 279.0900, found **279.0920**.

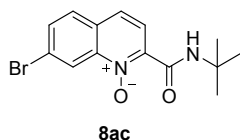

The compound was prepared according to general procedure 3.2 and purified by flash column chromatography (2:1 petroleum ether: ethyl acetate) to afford **8ac** (yellow solid, mp. 127 °C, **42 mg, 65%** yield): <sup>1</sup>H NMR (400 MHz, CDCl<sub>3</sub>) δ (ppm) 11.50 (s, 1H, NH), 8.99 (s, 1H, ArH), 8.43 (d, 1H, *J* = 12 Hz, ArH), 7.82–7.75 (m, 3H, ArH), 1.54 (s, 9H, 3CH<sub>3</sub>); <sup>13</sup>C NMR (100 MHz, CDCl<sub>3</sub>) δ (ppm) 158.6, 142.1, 139.0, 133.3, 129.4, 129.3, 126.1, 125.9, 123.0, 122.9, 51.6, 28.7; HRMS (ESI–Q–TOF) exact mass calcd for C<sub>14</sub>H<sub>16</sub>BrN<sub>2</sub>O<sub>2</sub> [M + H]<sup>+</sup> 323.0395, found 323.0371.

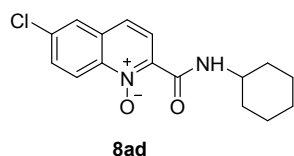

The compound was prepared according to general procedure 3.2 and purified by flash column chromatography (2:1 petroleum ether: ethyl acetate) to afford **8ad** (yellow solid, mp. 128 °C, **41 mg, 68%** yield): <sup>1</sup>H NMR (400 MHz, CDCl<sub>3</sub>) δ (ppm) 11.36 (d, 1H, *J* = 8 Hz, NH), 8.73 (d, 1H, *J* = 8 Hz, ArH), 8.46 (d, 1H, *J* = 8 Hz, ArH), 7.90 (s, 1H, ArH), 7.77–7.74 (m, 2H, ArH), 4.10–4.07 (m, 1H, CH), 2.05–2.03 (m, 2H, CH<sub>2</sub>), 1.80–1.75 (m, 2H, CH<sub>2</sub>), 1.65–1.62 (m, 1H, CH), 1.49–1.34 (m, 5H, CH+2CH<sub>2</sub>); <sup>13</sup>C NMR (100 MHz, CDCl<sub>3</sub>) δ (ppm) 159.0, 140.3, 137.9, 136.2, 131.9, 131.4, 126.9, 125.3, 124.2, 122.0, 48.6, 32.7, 25.7, 24.6; HRMS (ESI–Q–TOF) exact mass calcd for C<sub>16</sub>H<sub>18</sub>ClN<sub>2</sub>O<sub>2</sub> [M + H]<sup>+</sup> 305.1057, found 305.1050.

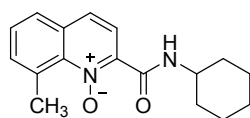

**8ae**

The compound was prepared according to general procedure 3.2 and purified by flash column chromatography (2:1 petroleum ether: ethyl acetate) to afford **8ae** (yellow oil, **41 mg, 73%** yield):  $^1\text{H}$  NMR (400 MHz,  $\text{CDCl}_3$ )  $\delta$  (ppm) 11.43 (d, 1H,  $J = 4$  Hz, NH), 8.33 (d, 1H,  $J = 12$  Hz, ArH), 7.69 (d, 1H,  $J = 12$  Hz, ArH), 7.65–7.63 (m, 1H, ArH), 7.49–7.44 (m, 2H, ArH), 4.11–4.04 (m, 1H, CH), 3.16 (s, 3H,  $\text{CH}_3$ ), 2.07–2.04 (m, 2H,  $\text{CH}_2$ ), 1.80–1.77 (m, 2H,  $\text{CH}_2$ ), 1.66–1.63 (m, 1H, CH), 1.49–1.42 (m, 4H,  $2\text{CH}_2$ ), 1.34–1.32 (m, 1H, CH);  $^{13}\text{C}$  NMR (100 MHz,  $\text{CDCl}_3$ )  $\delta$  (ppm) 159.8, 141.8, 138.7, 134.3, 132.5, 129.1, 126.9, 126.5, 122.7, 48.6, 32.8, 25.7, 24.8; HRMS (ESI–Q–TOF) exact mass calcd for  $\text{C}_{17}\text{H}_{21}\text{N}_2\text{O}_2$   $[\text{M} + \text{H}]^+$  285.1603, found **285.1590**.

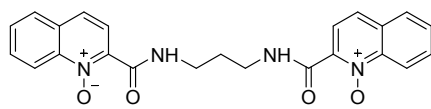

**8af**

The compound is known<sup>13</sup> and was prepared according to general procedure 3.2 (yellow solid, **56 mg, 68%** yield):  $^1\text{H}$  NMR (400 MHz,  $\text{CDCl}_3$ )  $\delta$  (ppm) 11.75 (s, 2H, NH), 8.67 (d, 2H,  $J = 8$  Hz, ArH), 8.44 (d, 2H,  $J = 8$  Hz, ArH), 7.88 (d, 2H,  $J = 8$  Hz, ArH), 7.83 (d, 2H,  $J = 8$  Hz, ArH), 7.78–7.74 (m, 2H, ArH), 7.71–7.67 (m, 2H, ArH), 3.76–3.71 (m, 4H,  $2\text{CH}_2$ ), 2.14–2.07 (m, 2H,  $\text{CH}_2$ );  $^{13}\text{C}$  NMR (100 MHz,  $\text{CDCl}_3$ )  $\delta$  (ppm) 160.8, 141.8, 137.5, 131.0, 130.7, 129.7, 128.1, 126.3, 122.8, 120.2, 37.7, 29.3.

### 3.3 General procedure for the copper-catalyzed amination of quinoline *N*-oxide

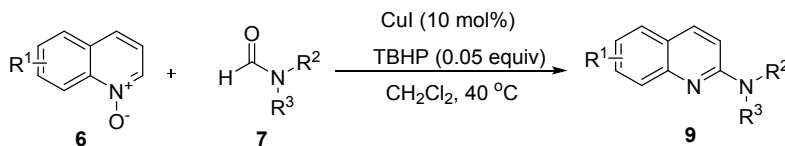

To a reaction tube were added quinoline *N*-oxides **6** (0.2 mmol) and formamide **7** (10 equiv), CuI (10 mol %), TBHP (5–6 M in decane) (0.05 equiv) and  $\text{CH}_2\text{Cl}_2$  (1 mL). Then the tube was charged with air, and was stirred at 40 °C until complete consumption of starting material as monitored by TLC and GC–MS analysis. After the reaction was finished, the reaction mixture was washed with brine. The aqueous phase was re-extracted with ethyl acetate. The combined organic extracts were dried over  $\text{Na}_2\text{SO}_4$ , concentrated in vacuum, and

the resulting residue was purified by silica gel column chromatography to afford the desired quinoline-2-amines **9**.

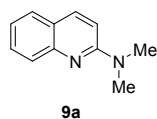

The compound is known<sup>14</sup> and was prepared according to general procedure 3.3 (**25 mg, 73% yield**): <sup>1</sup>H NMR (400 MHz, CDCl<sub>3</sub>) δ (ppm) 7.78 (d, 1H, *J* = 8 Hz, ArH), 7.63 (d, 1H, *J* = 8 Hz, ArH), 7.50 (d, 1H, *J* = 8 Hz, ArH), 7.46–7.42 (m, 1H, ArH), 7.12–7.09 (m, 1H, ArH), 6.81 (d, 1H, *J* = 8 Hz, ArH), 3.15 (s, 6H, 2CH<sub>3</sub>); <sup>13</sup>C NMR (100 MHz, CDCl<sub>3</sub>) δ (ppm) **157.6, 137.2, 129.4, 127.2, 126.3, 122.4, 121.7, 109.1, 38.1**.

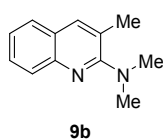

The compound was prepared according to general procedure 3.3 and purified by flash column chromatography (5:1 petroleum ether: ethyl acetate) to afford **9b** (yellow oil, **26 mg, 69% yield**): <sup>1</sup>H NMR (400 MHz, CDCl<sub>3</sub>) δ (ppm) 7.81 (d, 1H, *J* = 8 Hz, ArH), 7.74 (s, 1H, ArH), 7.59 (d, 1H, *J* = 8 Hz, ArH), 7.54–7.50 (m, 1H, ArH), 7.30–7.26 (m, 1H, ArH), 3.00 (s, 6H, 2CH<sub>3</sub>), 2.45 (s, 3H, CH<sub>3</sub>); <sup>13</sup>C NMR (100 MHz, CDCl<sub>3</sub>) δ (ppm) 161.9, 145.9, 138.1, 128.3, 127.1, 126.3, 125.3, 124.6, 123.5, 41.7, 19.9; HRMS (ESI-Q-TOF) exact mass calcd for C<sub>12</sub>H<sub>15</sub>N<sub>2</sub> [M + H]<sup>+</sup> 187.1235, found **187.1217**.

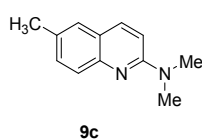

The compound is known<sup>15</sup> and was prepared according to general procedure 3.3 (**25 mg, 68% yield**): <sup>1</sup>H NMR (400 MHz, CDCl<sub>3</sub>) δ (ppm) 7.79 (d, 1H, *J* = 8 Hz, ArH), 7.65 (d, 1H, *J* = 8 Hz, ArH), 7.37–7.35 (m, 2H, ArH), 6.87 (d, 1H, *J* = 12 Hz, ArH), 3.20 (s, 6H, 2CH<sub>3</sub>), 2.44 (s, 3H, CH<sub>3</sub>); <sup>13</sup>C NMR (100 MHz, CDCl<sub>3</sub>) δ (ppm) **157.2, 136.8, 131.5, 131.1, 126.4, 126.0, 122.3, 109.1, 38.2, 21.1**.

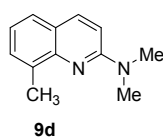

The compound was prepared according to general procedure 3.3 and purified by flash column

chromatography (5:1 petroleum ether: ethyl acetate) to afford **9d** (yellow oil, 28 mg, 74% yield):  $^1\text{H}$  NMR (400 MHz,  $\text{CDCl}_3$ )  $\delta$  (ppm) 7.83 (d, 1H,  $J = 8$  Hz, ArH), 7.44–7.38 (m, 2H, ArH), 7.10–7.06 (m, 1H, ArH), 6.87 (d, 1H,  $J = 8$  Hz, ArH), 3.21 (s, 6H, 2CH<sub>3</sub>), 2.65 (s, 3H, CH<sub>3</sub>);  $^{13}\text{C}$  NMR (100 MHz,  $\text{CDCl}_3$ )  $\delta$  (ppm) 156.8, 146.8, 137.5, 134.1, 129.5, 125.1, 122.0, 121.2, 108.5, 37.9, 17.8; HRMS (ESI–Q–TOF) exact mass calcd for  $\text{C}_{12}\text{H}_{15}\text{N}_2$   $[\text{M} + \text{H}]^+$  187.1235, found 187.1242.

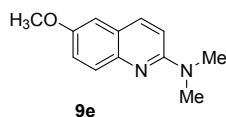

The compound is known<sup>15</sup> and was prepared according to general procedure 3.3 (26 mg, 65% yield):  $^1\text{H}$  NMR (400 MHz,  $\text{CDCl}_3$ )  $\delta$  (ppm) 7.80 (d, 1H,  $J = 12$  Hz, ArH), 7.66 (d, 1H,  $J = 12$  Hz, ArH), 7.22–7.19 (m, 1H, ArH), 6.95 (d, 1H,  $J = 4$  Hz, ArH), 6.88 (d, 1H,  $J = 8$  Hz, ArH), 3.87 (s, 3H, OCH<sub>3</sub>), 3.20 (s, 6H, 2CH<sub>3</sub>);  $^{13}\text{C}$  NMR (100 MHz,  $\text{CDCl}_3$ )  $\delta$  (ppm) 156.7, 154.5, 136.2, 127.7, 122.6, 121.0, 109.4, 106.2, 55.5, 38.2.

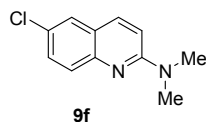

The compound is known<sup>15</sup> and was prepared according to general procedure 3.3 (26 mg, 60% yield):  $^1\text{H}$  NMR (400 MHz,  $\text{CDCl}_3$ )  $\delta$  (ppm) 7.76 (d, 1H,  $J = 8$  Hz, ArH), 7.62 (d, 1H,  $J = 8$  Hz, ArH), 7.54 (s, 1H, ArH), 7.44 (d, 1H,  $J = 8$  Hz, ArH), 6.90 (d, 1H,  $J = 12$  Hz, ArH), 3.22 (s, 6H, 2CH<sub>3</sub>);  $^{13}\text{C}$  NMR (100 MHz,  $\text{CDCl}_3$ )  $\delta$  (ppm) 157.6, 136.2, 130.0, 127.8, 126.6, 126.0, 122.9, 109.9, 38.0.

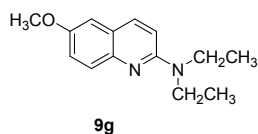

The compound is known<sup>16</sup> and was prepared according to general procedure 3.3 (23 mg, 50% yield):  $^1\text{H}$  NMR (400 MHz,  $\text{CDCl}_3$ )  $\delta$  (ppm) 7.45 (d, 1H,  $J = 8$  Hz, ArH), 7.59 (d, 1H,  $J = 8$  Hz, ArH), 7.19–7.16 (m, 1H, ArH), 6.93 (d, 1H,  $J = 4$  Hz, ArH), 6.81 (d, 1H,  $J = 8$  Hz, ArH), 3.86 (s, 3H, OCH<sub>3</sub>), 3.66–3.60 (m, 4H, 2CH<sub>2</sub>), 1.23 (t, 6H,  $J = 8$  Hz, 2CH<sub>3</sub>);  $^{13}\text{C}$  NMR (100 MHz,  $\text{CDCl}_3$ )  $\delta$  (ppm) 154.4, 136.2, 127.7, 122.5, 120.7, 109.4, 106.3, 55.5, 42.4, 13.3.

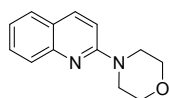

**9h**

The compound is known<sup>17</sup> and was prepared according to general procedure 3.3 (**25 mg, 60% yield**): <sup>1</sup>H NMR (400 MHz, CDCl<sub>3</sub>) δ (ppm) 7.91 (d, 1H, *J* = 8 Hz, ArH), 7.72 (d, 1H, *J* = 8 Hz, ArH), 7.61 (d, 1H, *J* = 8 Hz, ArH), 7.57–7.53 (m, 1H, ArH), 7.27–7.25 (m, 1H, ArH), 6.95 (d, 1H, *J* = 8 Hz, ArH), 3.87–3.84 (m, 4H, 2CH<sub>2</sub>), 3.72–3.69 (m, 2H, CH<sub>2</sub>); <sup>13</sup>C NMR (100 MHz, CDCl<sub>3</sub>) δ (ppm) **157.5, 147.7, 137.6, 129.6, 127.2, 126.8, 123.3, 122.7, 109.3, 66.9, 45.6.**

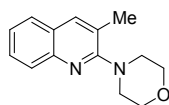

**9i**

The compound was prepared according to general procedure 3.3 and purified by flash column chromatography (5:1 petroleum ether: ethyl acetate) to afford **9i** (yellow oil, **26 mg, 60% yield**): <sup>1</sup>H NMR (400 MHz, CDCl<sub>3</sub>) δ (ppm) 7.88 (d, 1H, *J* = 8 Hz, ArH), 7.82 (s, 1H, ArH), 7.64 (d, 1H, *J* = 8 Hz, ArH), 7.58–7.54 (m, 1H, ArH), 7.37–7.33 (m, 1H, ArH), 3.92–3.89 (m, 4H, 2CH<sub>2</sub>), 3.35–3.33 (m, 4H, 2CH<sub>2</sub>), 2.44 (s, 3H, CH<sub>3</sub>); <sup>13</sup>C NMR (100 MHz, CDCl<sub>3</sub>) δ (ppm) 156.1, 144.9, 136.1, 131.2, 130.7, 125.4, 125.3, 122.2, 108.3, 65.9, 44.8, 20.2; HRMS (ESI-Q-TOF) exact mass calcd for C<sub>14</sub>H<sub>17</sub>N<sub>2</sub>O [M + H]<sup>+</sup> 229.1341, found 229.1319.

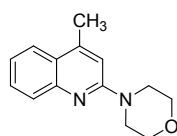

**9j**

The compound is known<sup>18</sup> and was prepared according to general procedure 3.3 (**30 mg, 67% yield**): <sup>1</sup>H NMR (400 MHz, CDCl<sub>3</sub>) δ (ppm) 7.77 (d, 1H, *J* = 8 Hz, ArH), 7.72 (d, 1H, *J* = 8 Hz, ArH), 7.56–7.52 (m, 1H, ArH), 7.28–7.24 (m, 1H, ArH), 6.80 (s, 1H, ArH), 3.85–3.83 (m, 4H, 2CH<sub>2</sub>), 3.70–3.68 (m, 4H, 2CH<sub>2</sub>), 2.60 (s, 3H, CH<sub>3</sub>); <sup>13</sup>C NMR (100 MHz, CDCl<sub>3</sub>) δ (ppm) **157.4, 145.3, 129.4, 127.2, 123.5, 122.5, 109.6, 100.0, 66.9, 45.6, 19.3.**

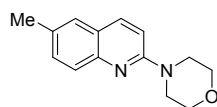

**9k**

The compound was prepared according to general procedure 3.3 and purified by flash column chromatography (5:1 petroleum ether: ethyl acetate) to afford **9k** (yellow oil, **35 mg, 78%**

yield):  $^1\text{H}$  NMR (400 MHz,  $\text{CDCl}_3$ )  $\delta$  (ppm) 7.85 (d, 1H,  $J = 8$  Hz, ArH), 7.65 (d, 1H,  $J = 8$  Hz, ArH), 7.42–7.40 (m, 2H, ArH), 6.93 (d, 1H,  $J = 8$  Hz, ArH), 3.87–3.85 (m, 4H,  $2\text{CH}_2$ ), 3.70–3.68 (m, 4H,  $2\text{CH}_2$ ), 2.47 (s, 3H,  $\text{CH}_3$ );  $^{13}\text{C}$  NMR (100 MHz,  $\text{CDCl}_3$ )  $\delta$  (ppm) 157.2, 145.9, 137.1, 132.2, 131.7, 126.4, 123.3, 109.3, 66.9, 45.8, 21.2; HRMS (ESI–Q–TOF) exact mass calcd for  $\text{C}_{14}\text{H}_{17}\text{N}_2\text{O}$   $[\text{M} + \text{H}]^+ 229.1341$ , found 229.1319.

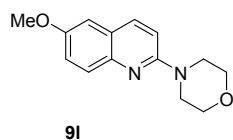

The compound was prepared according to general procedure 3.3 and purified by flash column chromatography (5:1 petroleum ether: ethyl acetate) to afford **9l** (yellow oil, 33 mg, 68% yield):  $^1\text{H}$  NMR (400 MHz,  $\text{CDCl}_3$ )  $\delta$  (ppm) 7.85 (d, 1H,  $J = 8$  Hz, ArH), 7.66 (d, 1H,  $J = 8$  Hz, ArH), 7.25–7.22 (m, 1H, ArH), 6.97–6.93 (m, 2H, ArH), 3.88 (s, 3H,  $\text{OCH}_3$ ), 3.87–3.84 (m, 4H,  $2\text{CH}_2$ ), 3.66–3.63 (m, 4H,  $2\text{CH}_2$ );  $^{13}\text{C}$  NMR (100 MHz,  $\text{CDCl}_3$ )  $\delta$  (ppm) 156.6, 155.3, 143.3, 136.6, 128.2, 123.8, 121.3, 109.8, 106.0, 66.9, 55.5, 46.0; HRMS (ESI–Q–TOF) exact mass calcd for  $\text{C}_{14}\text{H}_{17}\text{N}_2\text{O}_2$   $[\text{M} + \text{H}]^+ 245.1290$ , found 245.1270.

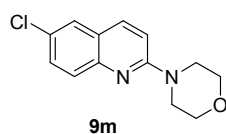

The compound was prepared according to general procedure 3.3 and purified by flash column chromatography (5:1 petroleum ether: ethyl acetate) to afford **9m** (yellow oil, 27 mg, 55% yield):  $^1\text{H}$  NMR (400 MHz,  $\text{CDCl}_3$ )  $\delta$  (ppm) 7.81 (d, 1H,  $J = 8$  Hz, ArH), 7.63 (d, 1H,  $J = 8$  Hz, ArH), 7.57 (s, 1H, ArH), 7.47 (d, 1H,  $J = 8$  Hz, ArH), 6.96 (d, 1H,  $J = 8$  Hz, ArH), 3.86–3.83 (m, 4H,  $2\text{CH}_2$ ), 3.71–3.69 (m, 4H,  $2\text{CH}_2$ );  $^{13}\text{C}$  NMR (100 MHz,  $\text{CDCl}_3$ )  $\delta$  (ppm) 157.5, 146.2, 136.6, 130.2, 128.3, 127.7, 126.0, 123.8, 110.1, 66.8, 45.5; HRMS (ESI–Q–TOF) exact mass calcd for  $\text{C}_{13}\text{H}_{14}\text{ClN}_2\text{O}$   $[\text{M} + \text{H}]^+ 249.0795$ , found 249.0777.

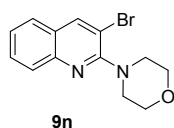

The compound was prepared according to general procedure 3.3 and purified by flash column chromatography (5:1 petroleum ether: ethyl acetate) to afford **9n** (yellow oil, 40 mg, 68% yield):  $^1\text{H}$  NMR (400 MHz,  $\text{CDCl}_3$ )  $\delta$  (ppm) 8.28 (s, 1H, ArH), 7.85 (d, 1H,  $J = 8$  Hz, ArH),



7.65–7.61 (m, 2H, ArH), 7.42–7.38 (m, 1H, ArH), 3.93–3.91 (m, 4H, 2CH<sub>2</sub>), 3.50–3.48 (m, 4H, 2CH<sub>2</sub>); <sup>13</sup>C NMR (100 MHz, CDCl<sub>3</sub>) δ (ppm) 157.3, 145.8, 141.6, 129.8, 127.7, 126.4, 125.1, 112.3, 66.9, 50.3; HRMS (ESI–Q–TOF) exact mass calcd for C<sub>13</sub>H<sub>14</sub>BrN<sub>2</sub>O [M + H]<sup>+</sup> 293.0290, found **293.0303**.

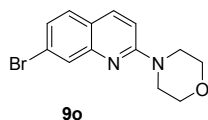

The compound was prepared according to general procedure 3.3 and purified by flash column chromatography (5:1 petroleum ether: ethyl acetate) to afford **9o** (yellow oil, 33 mg, 57% yield): <sup>1</sup>H NMR (400 MHz, CDCl<sub>3</sub>) δ (ppm) 7.90 (s, 1H, ArH), 7.86 (d, 1H, *J* = 8 Hz, ArH), 7.45 (d, 1H, *J* = 8 Hz, ArH), 7.32 (d, 1H, *J* = 8 Hz, ArH), 7.95 (d, 1H, *J* = 8 Hz, ArH), 3.86–3.83 (m, 4H, 2CH<sub>2</sub>), 3.73–3.70 (m, 4H, 2CH<sub>2</sub>); <sup>13</sup>C NMR (100 MHz, CDCl<sub>3</sub>) δ (ppm) 157.7, 148.5, 137.4, 129.0, 128.4, 125.9, 123.7, 121.8, 109.4, 66.8, 45.4; HRMS (ESI–Q–TOF) exact mass calcd for C<sub>13</sub>H<sub>14</sub>BrN<sub>2</sub>O [M + H]<sup>+</sup> 293.0290, found **293.0287**.

## 4. Synthetic Utility of Methodology

### 4.1 Gram-scale reaction

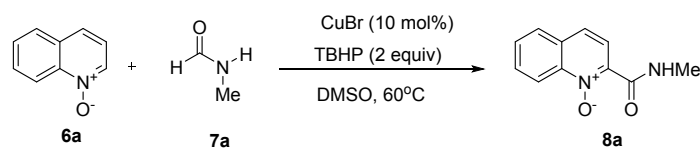

Gram-scale reaction: 10 mmol scale, 85% (**8a**: 1.7 g)

Quinoline *N*-oxides **6a** (10 mmol, 1.45 g) was added in a 50 mL dried round-bottomed flask, followed by the addition of *N*-methylformamide **7a** (10 equiv), CuBr (10 mol %), TBHP (5.0–6.0 M in decane) (2 equiv) and DMSO (20 mL). Then the mixture was stirred at **60 °C until complete** consumption of starting material as monitored by TLC and GC-MS analysis. After the reaction was finished, the reaction mixture was washed with brine. The aqueous phase was re-extracted with ethyl acetate. The combined organic extracts were dried over Na<sub>2</sub>SO<sub>4</sub>, concentrated in vacuum, and the resulting residue was purified by silica gel column chromatography to afford the desired quinoline-*N*-oxide-2-carboxamides **8a** (1.7 g, **85% yield**).

### 4.2 Sequential one-pot process

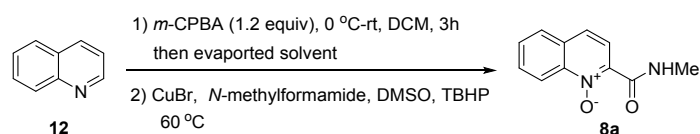

To a solution of quinoline **12** (10 mmol) in CH<sub>2</sub>Cl<sub>2</sub> (40 mL) at 0 °C was added *m*-CPBA (12 mmol, 1.2 equiv). The mixture was stirred at 0 °C for 1 hour and then continued to stir at room temperature

till the full conversion of quinoline as detected by TLC. Solvent was removed under reduced pressure. To the residue was added *N*-methylformylamide **7a** (10 equiv), CuBr (10 mol %), TBHP (5.0-6.0 M in decane) (2 equiv) and DMSO (20 mL). The mixture was stirred at 60 °C until complete consumption of starting material as monitored by TLC and GC-MS analysis. After the reaction was finished, the reaction mixture was washed with brine. The aqueous phase was re-extracted with ethyl acetate. The combined organic extracts were dried over Na<sub>2</sub>SO<sub>4</sub>, concentrated in vacuum, and the resulting residue was purified by silica gel column chromatography to afford the desired quinoline-*N*-oxide-2-carboxamides **8a** (1.7g, 85% yield).

## 5. Mechanistic Study

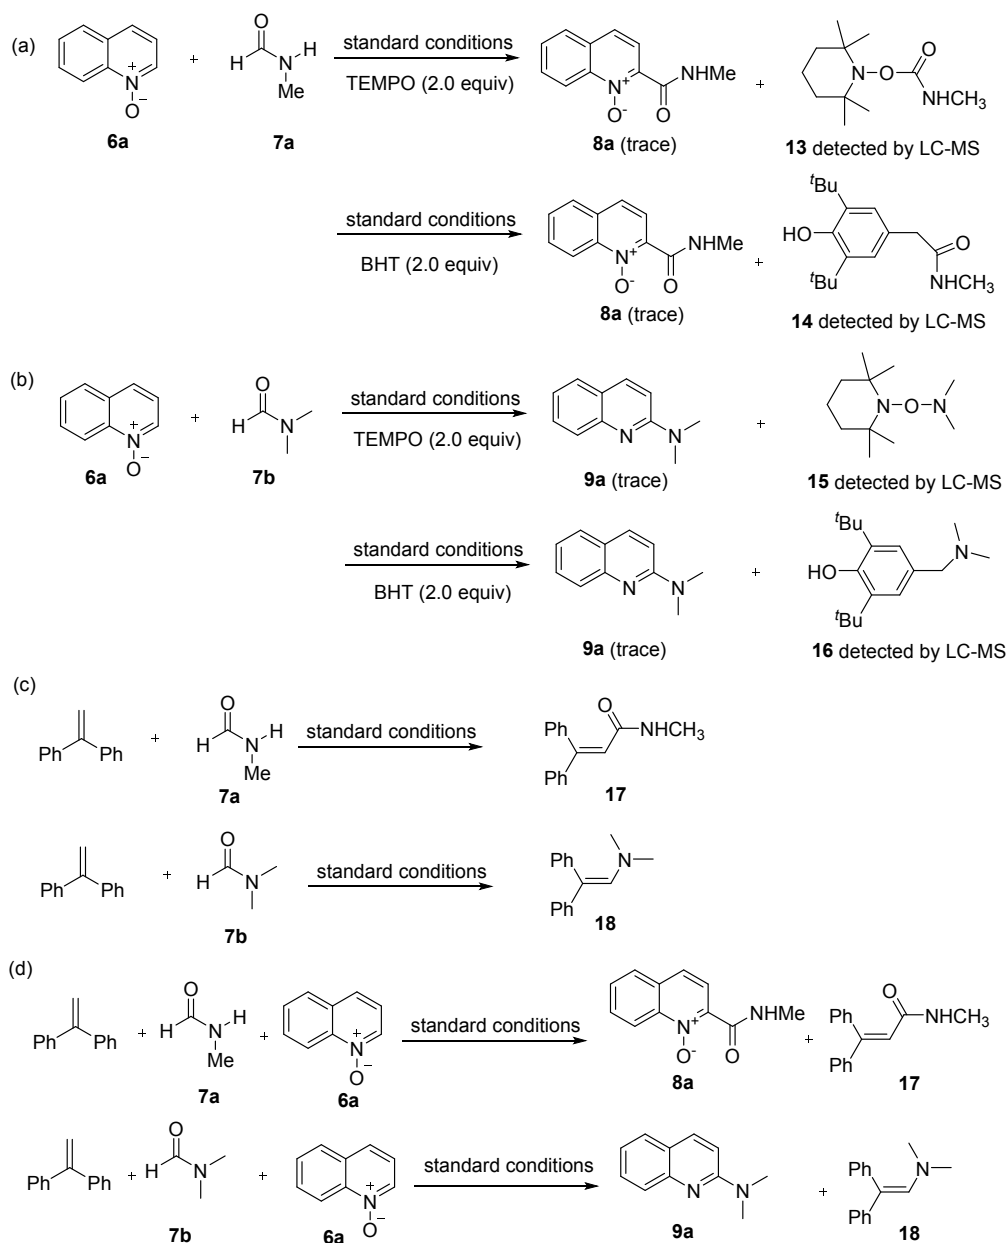

### 5.1 Addition of TEMPO and BHT to the Model Reaction of **6a** and **7a**

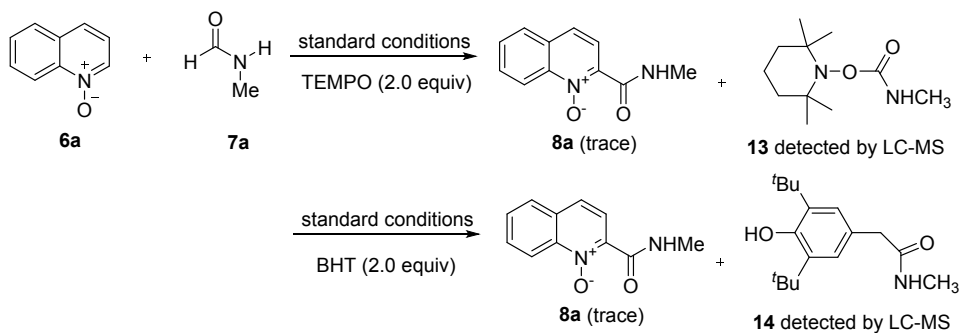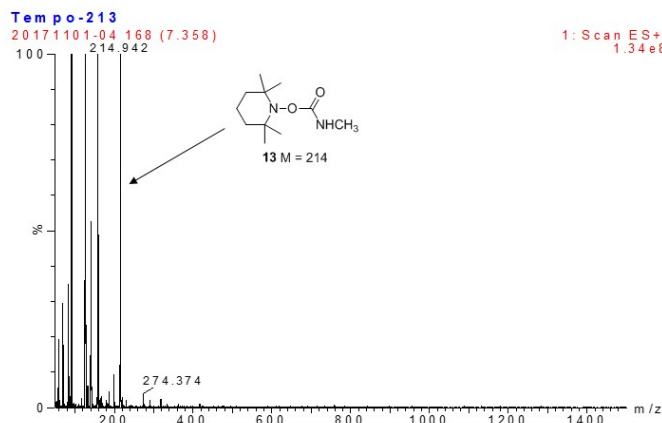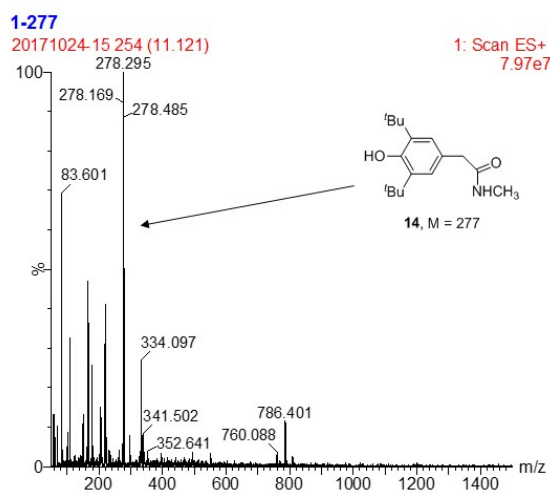

## 5.2 Addition of TEMPO and BHT to the Model Reaction of **6a** and **7b**

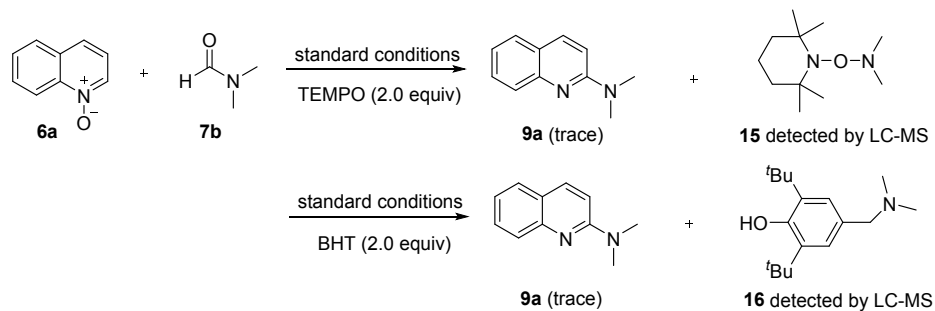

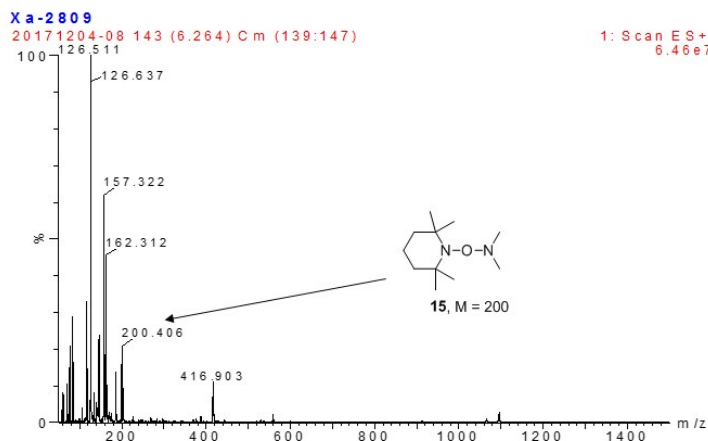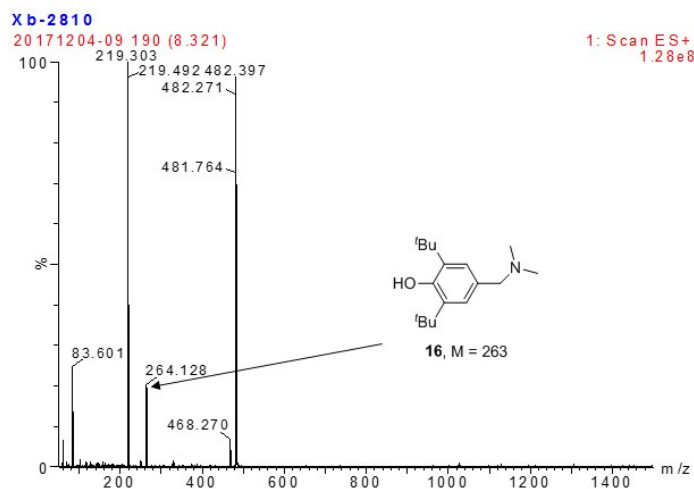

### 5.3 Reaction of *N*-methyl formamide **7a** with 1,1-diphenylethylene under standard conditions

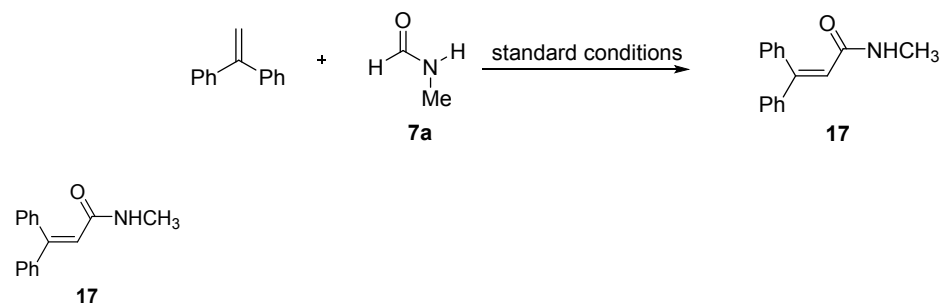

$^1\text{H}$  NMR (400 MHz,  $\text{CDCl}_3$ )  $\delta$  (ppm) 7.88 (d, 1H,  $J = 4$  Hz, NH), 7.36-7.32 (m, 6H, ArH), 7.22-7.20 (m, 2H, ArH), 7.13-7.10 (m, 2H, ArH), 6.40 (s, 1H, CH), 2.54 (d, 3H,  $J = 4$  Hz,  $\text{CH}_3$ );  $^{13}\text{C}$  NMR (100 MHz,  $\text{CDCl}_3$ )  $\delta$  (ppm) 166.0, 149.1, 142.0, 139.6, 129.7, 129.0, 128.9, 128.1, 127.9, 122.9, 25.9.

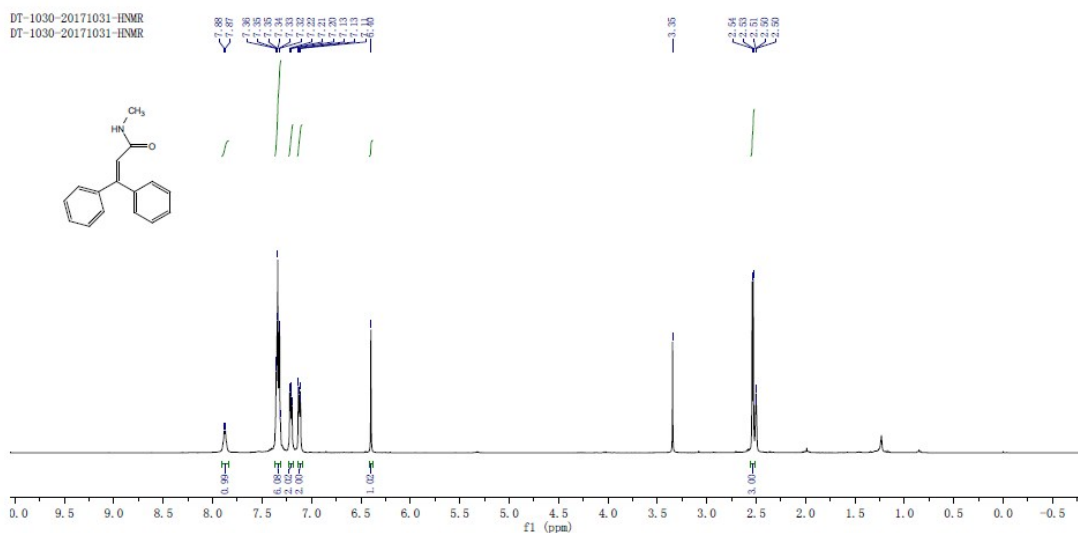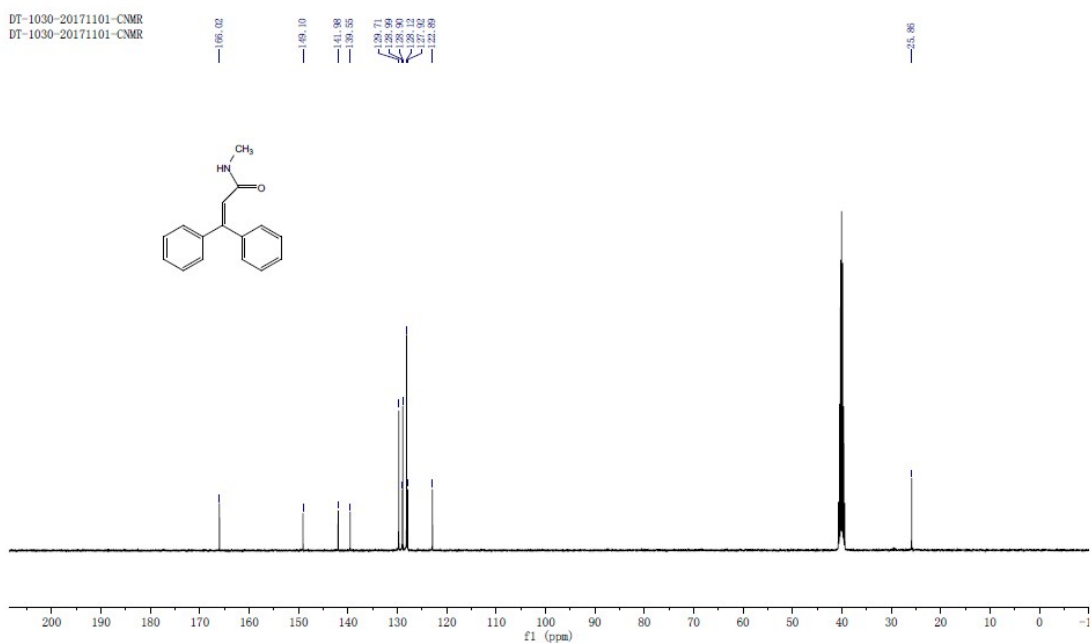

#### 5.4 Reaction of DMF **7b** with 1,1-diphenylethylene under standard conditions

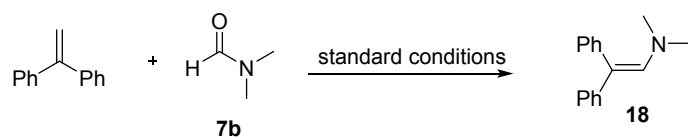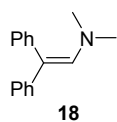

<sup>1</sup>H NMR (400 MHz, CDCl<sub>3</sub>) δ (ppm) 7.34-7.26 (m, 10H, ArH), 6.35 (s, 1H, CH), 2.83 (s, 3H, CH<sub>3</sub>), 2.76 (s, 3H, CH<sub>3</sub>).

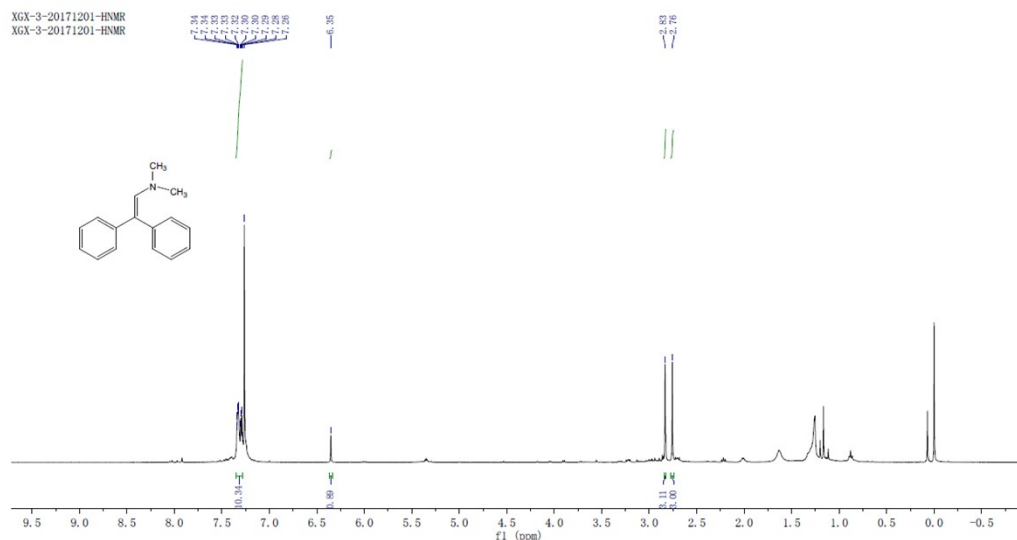

5.5 Reaction of quinoline-*N*-oxide **6a**, *N*-methyl formamide **7a** and 1,1-diphenylethylene under standard conditions

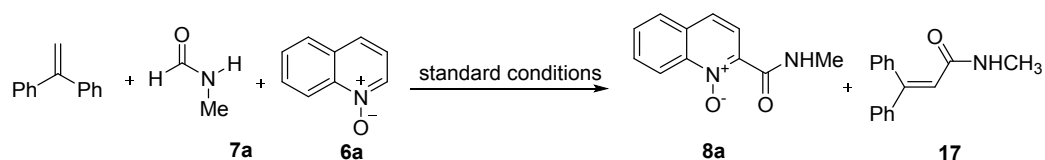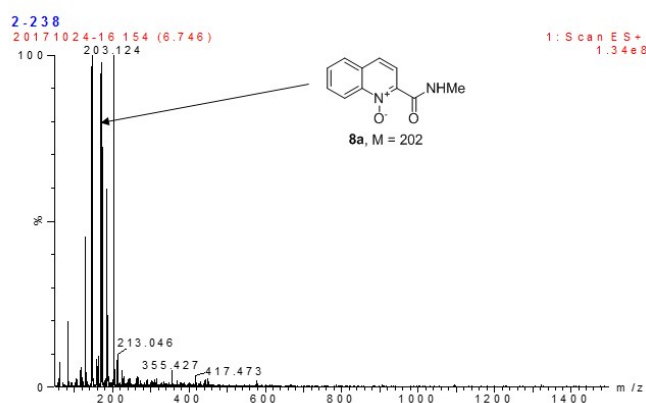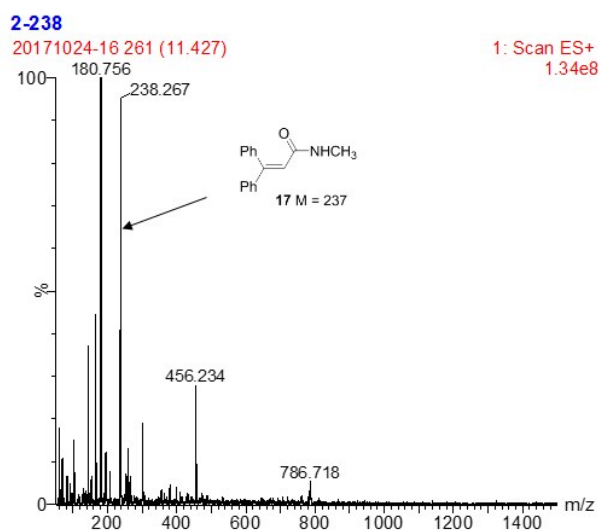

## 5.6 Reaction of quinoline-*N*-oxide **6a**, DMF **7b** and 1,1-diphenylethylene under standard conditions

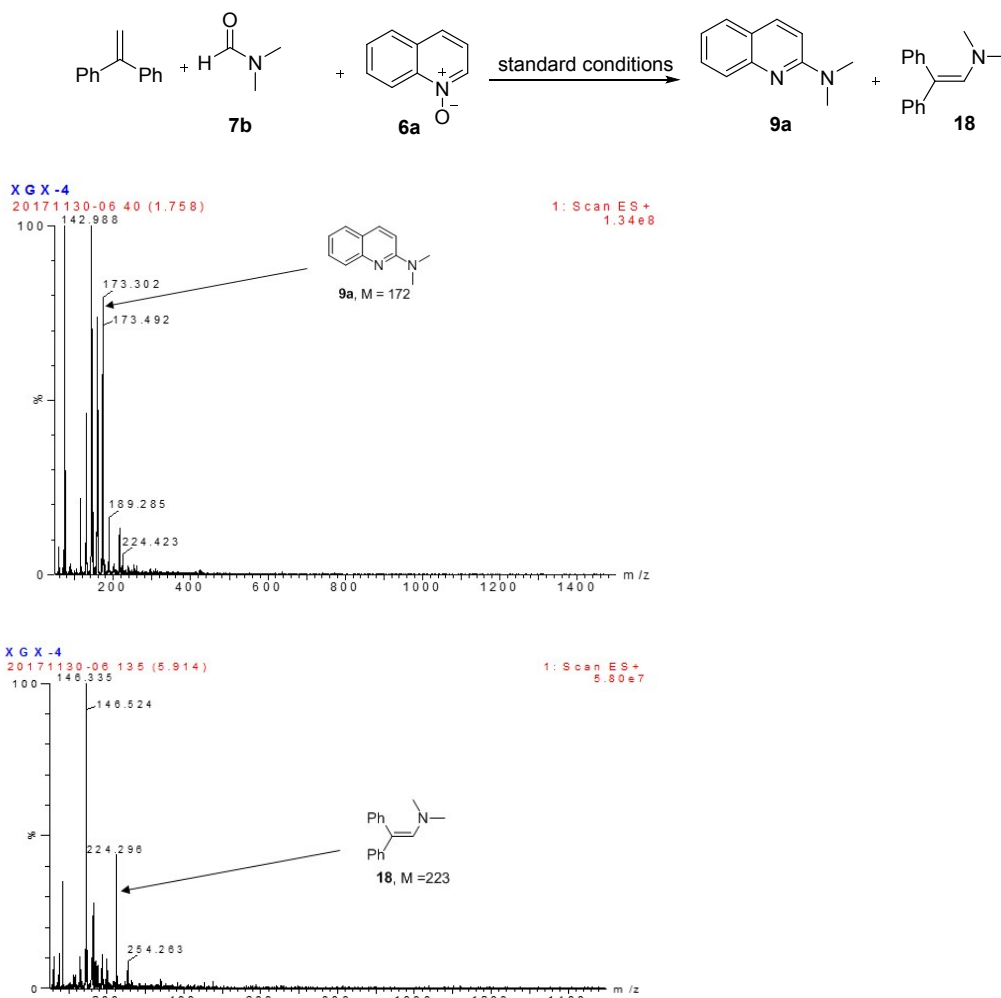

## C<sub>2</sub> Selective Carbamoylation and Amination of Quinoline *N*-Oxide with Formamide

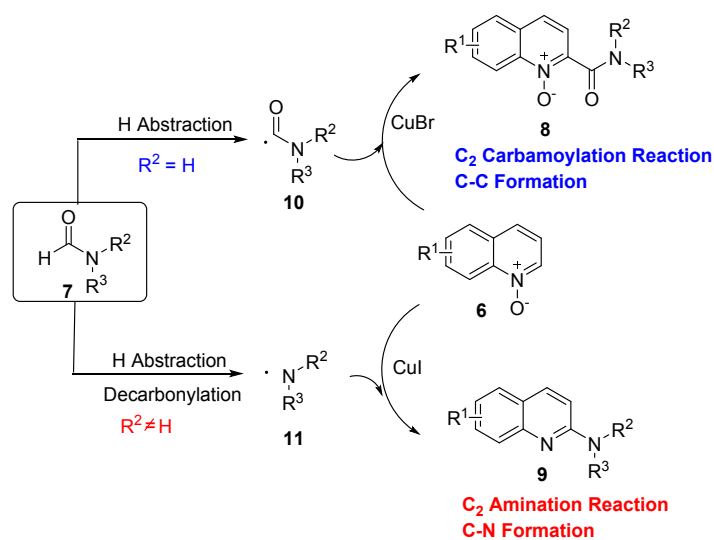

## 5.7 Reaction color changes for C<sub>2</sub> selective carbamoylation and amination of quinoline *N*-oxide with formamide

---

### carbamoylation of quinoline *N*-oxide

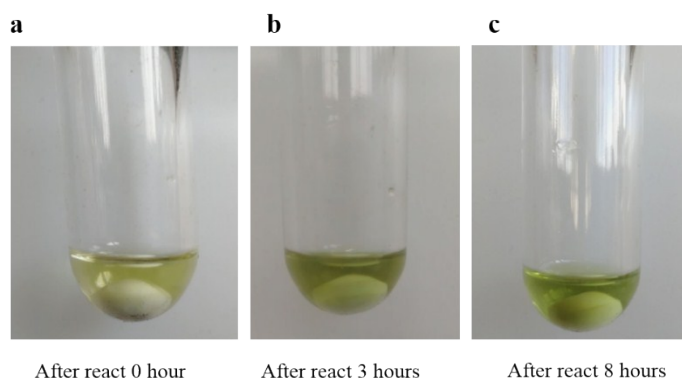

### amination of quinoline *N*-oxide

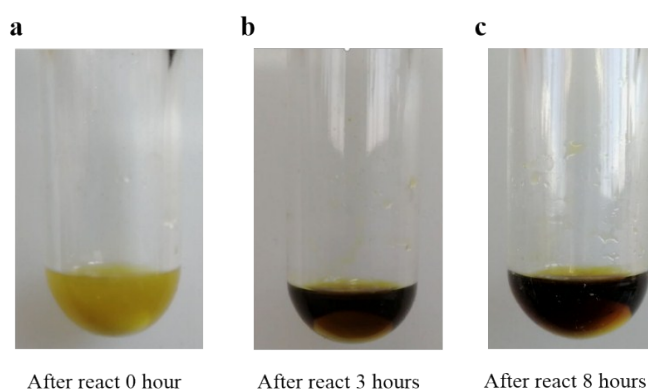

## 6. Reference

1. H. Xia, Y. H. Liu, P. Zhao, S. H. Gou, J. Wang, *Org. Lett.* 2016, **18**, 1796–1799.
2. O. V. Larionov, D. Stephens, A. Mfuh, G. Chavez, *Org. Lett.* 2014, **16**, 864–867.
3. J. Zhao, P. Li, C. Xia, F. Li, *RSC Adv.* 2015, **5**, 32835–32838.
4. G. Li, C. Jia, K. Sun, Y. Lv, F. Zhao, K. Zhou, H. Wu, *Org. Biomol. Chem.* 2015, **13**, 3207–3210.
5. A. Biswas, U. Karmakar, S. Nandi, R. Samanta, *J. Org. Chem.* 2017, **82**, 8933–8942.
6. R. Sharma, I. Kumar, R. Kumar, U. Sharma, *Adv. Synth. Catal.* 2017, **359**, 3022–3028.
7. W. P. Ma, J. W. Zhang, C. Xu, F. Chen, Y. M. He, Q. H. Fan, *Angew. Chem.* 2016, **128**, 13083–13086.
8. X. Y. Gao, A. P. Liang, J. Y. Li, D. P. Zou, Y. J. Wu, Y. S. Wu, *Tetrahedron Lett.* 2017, **58**, 1917–1920.
9. G. E. M. Crisenza, E. M. Dauncey, J. F. Bower, *Org. Biomol. Chem.* 2016, **14**, 5820–5825.
10. L. Y. Xie, Y. Duan, L. H. Lu, Y. J. Li, S. Peng, C. Wu, K. J. Liu, Z. Wang, W. M. He, *ACS*



---

*Sustainable Chem. Eng.* 2017, **5**, 10407–10412.

11. P. Li, J. J. Zhao, C. G. Xia, F. W. Li, *Org. Chem. Front.* 2015, **2**, 1313–1317.

12. T. Dziembowska, M. Szafran, *Roczniki Chemii*, 1974, **48**, 2293–2296.

13. M. Echeverría, B. Mendivil, L. Cordeu, E. Cubedo, J. García-Foncillas, M. Font, C. Sanmartín, J. A. Palop, *Arch. Pharm. Chem. Life Sci.* 2006, **339**, 182–192.

14. J. T. Gupton, J. P. Idoux, G. Baker, C. Colon, A. D. Crews, C. D. Jurss, R. C. Rampi, *J. Org. Chem.* 1983, **48**, 2933–2936.

15. C. Jutz, R. M. Wagner, *Angew. Chem.* 1972, **11**, 315–318.

16. X. Chen, X. Li, Z. Qu, D. Ke, L. Qu, L. Duan, W. Mai, J. Yuan, J. Chen, Y. Zhao, *Adv. Synth. Catal.* 2014, **356**, 1979–1985.

17. J. Richardson, J. C. Ruble, E. A. Love, S. Berritt, *J. Org. Chem.* 2017, **82**, 3741–3750.

18. Q. Y. Deng, Y. Zhang, H. B. Zhu, T. Tu, *Chem. – Asian J.* 2017, **12**, 2364–2368.

## 7. $^1\text{H}$ and $^{13}\text{C}$ NMR Spectra of Substrates and Products

### 7.1 $^1\text{H}$ NMR Spectra of Substrates

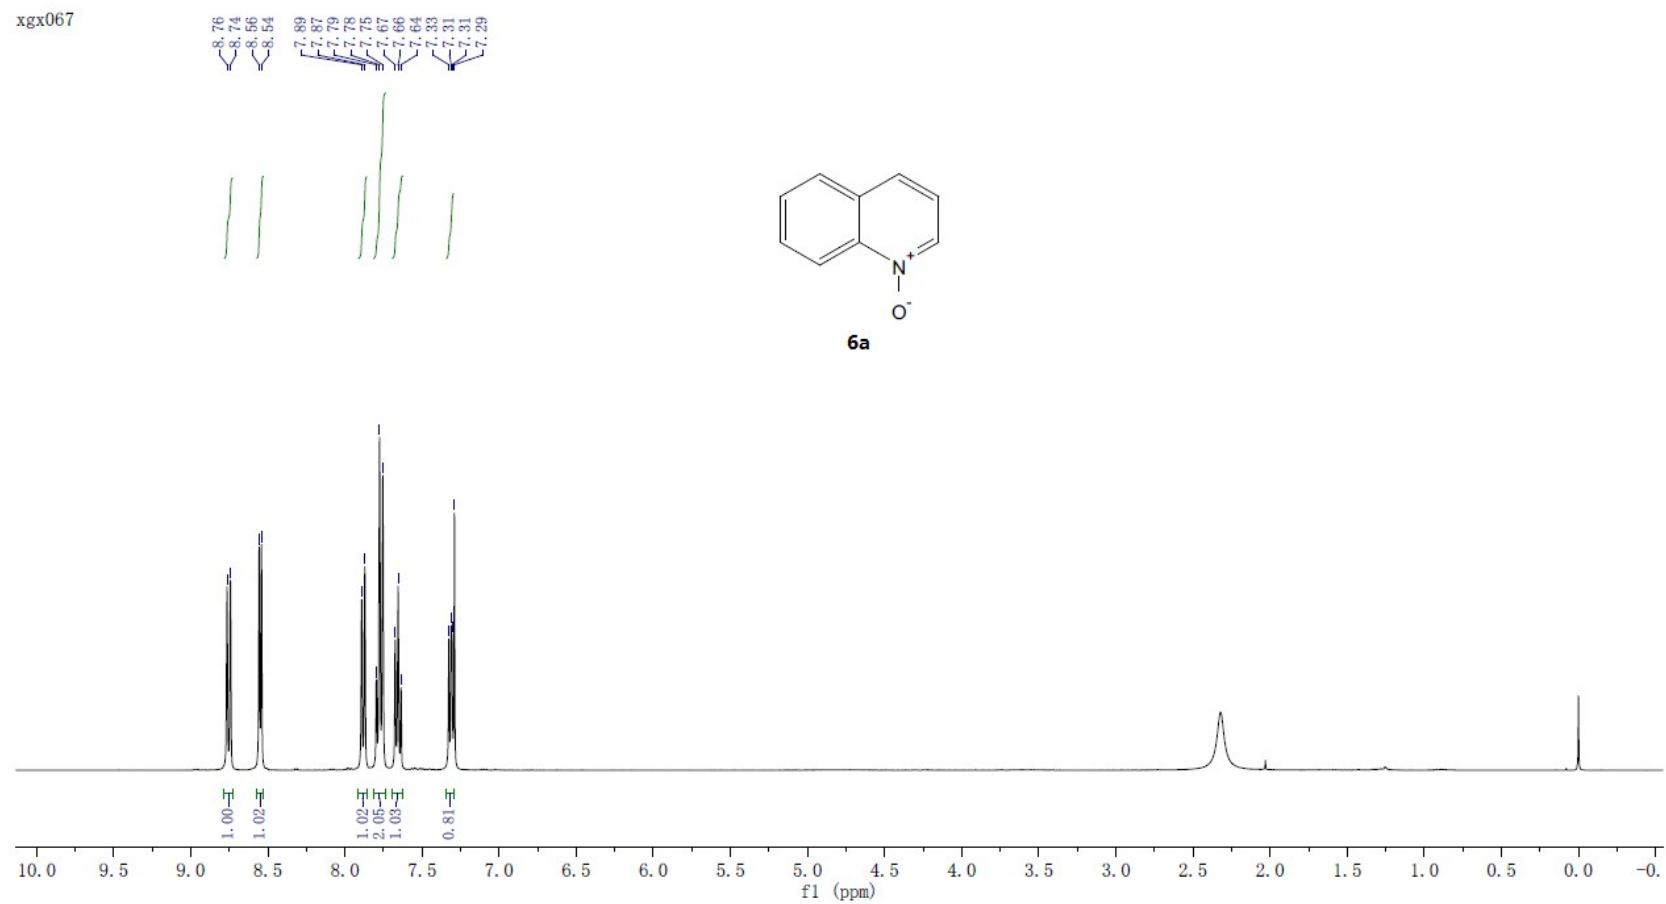

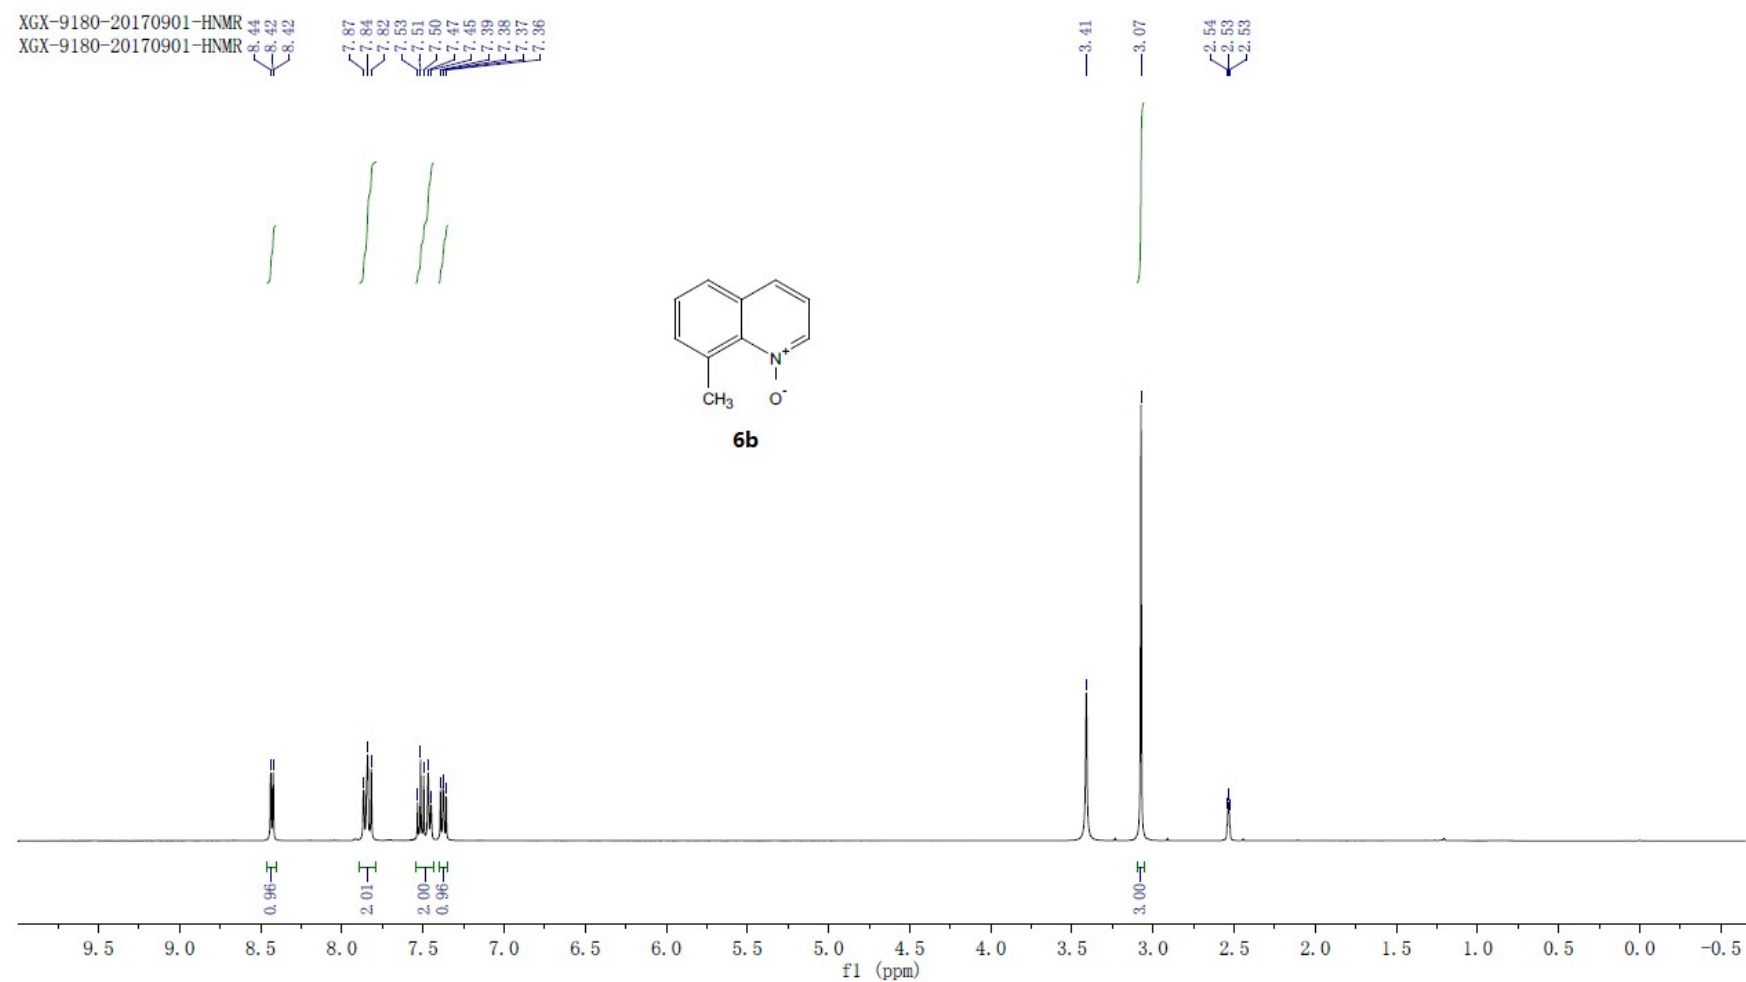

XGX-423-20170721-HNMR  
XGX-423-20170721-HNMR

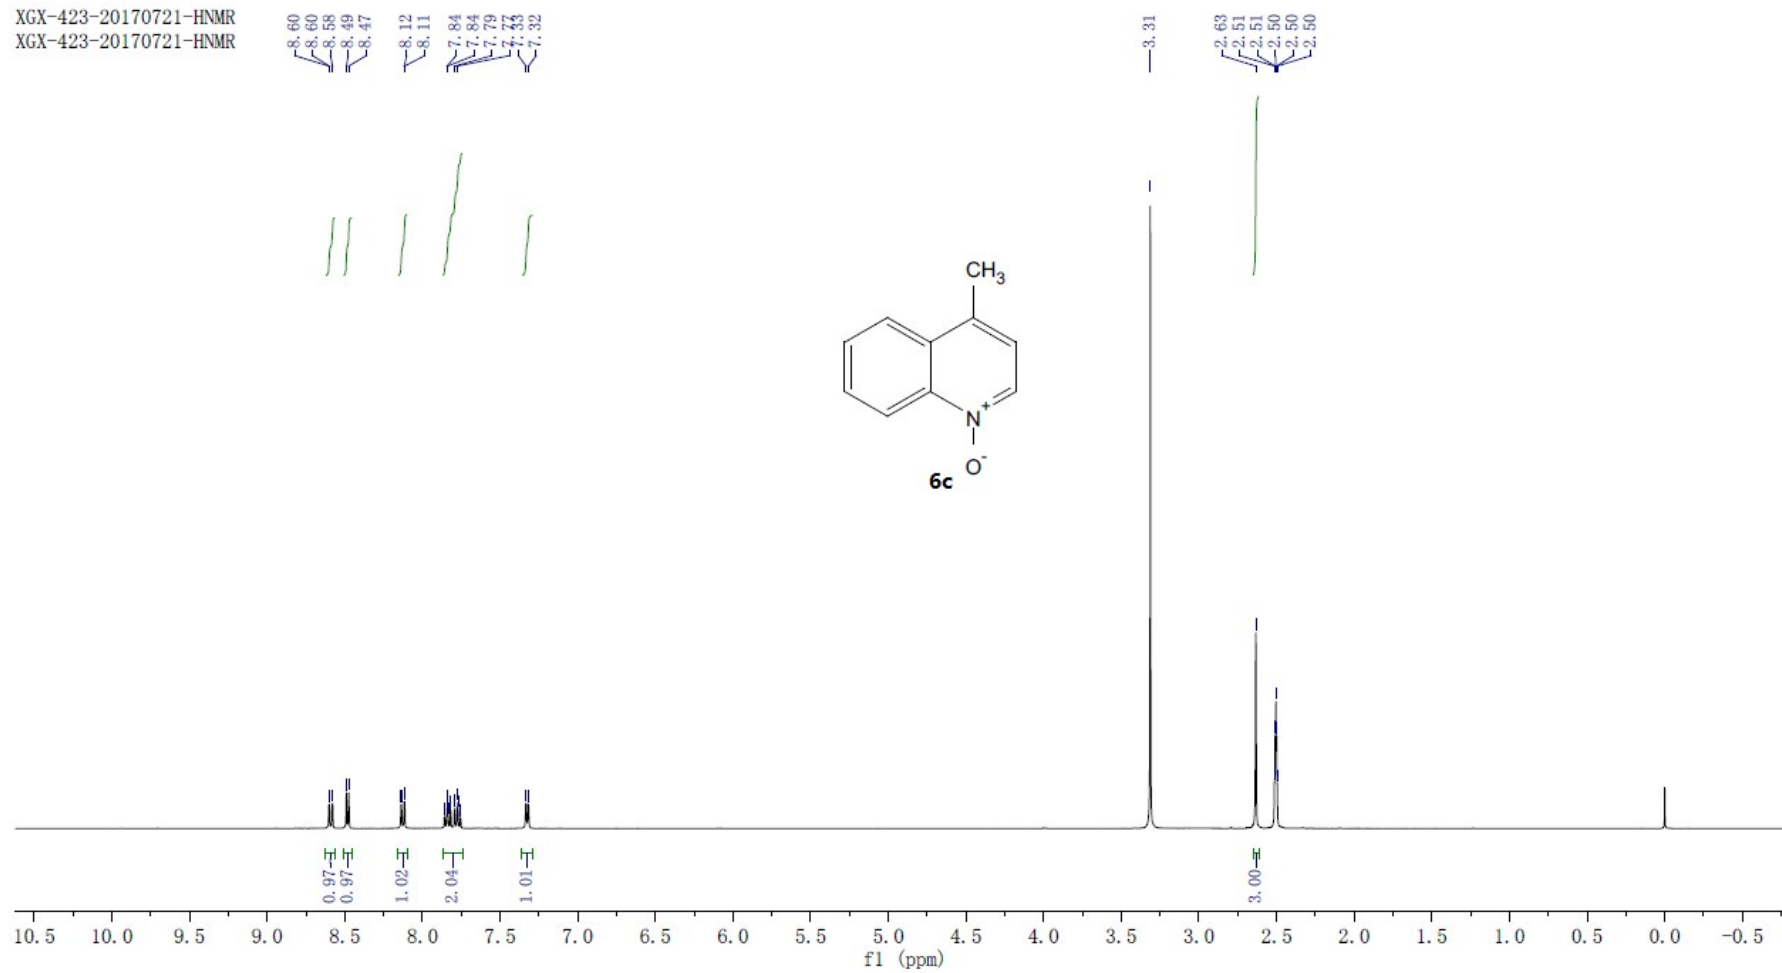

XGX-6JJ-20171020-HNMR  
XGX-6JJ-20171020-HNMR

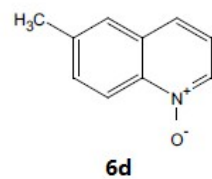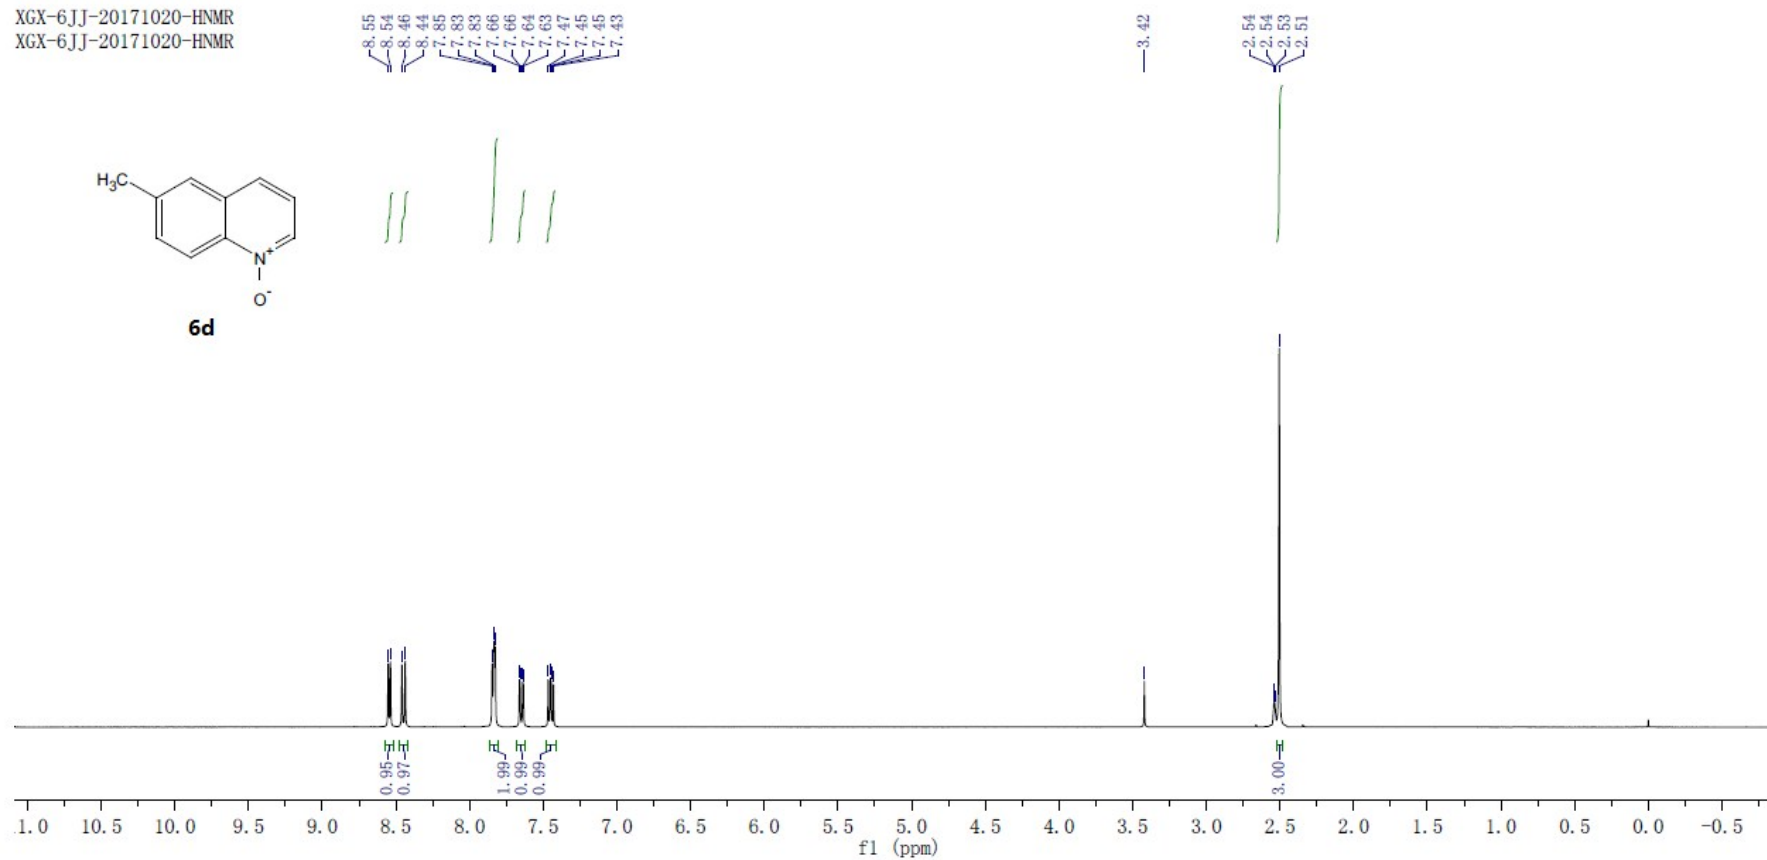

XGX-318-20170721-HNMR  
XGX-318-20170721-HNMR

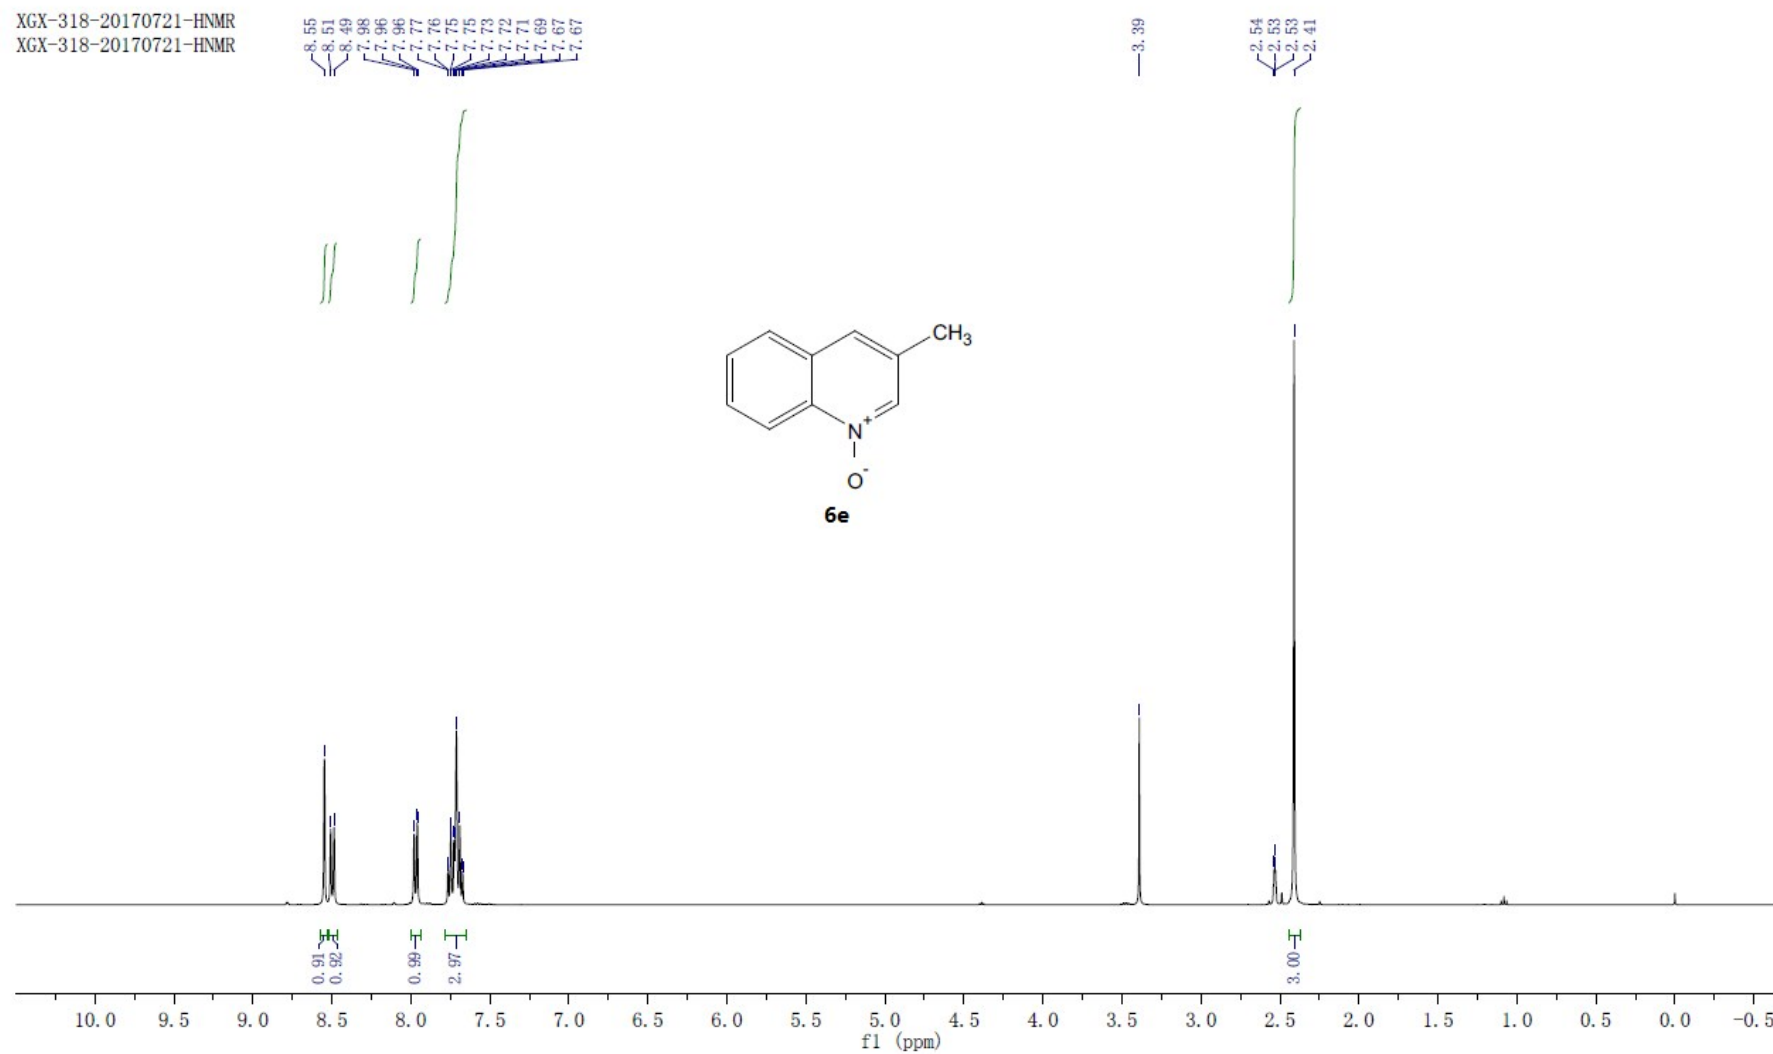

XGX-220-20170721-HNMR  
XGX-220-20170721-HNMR

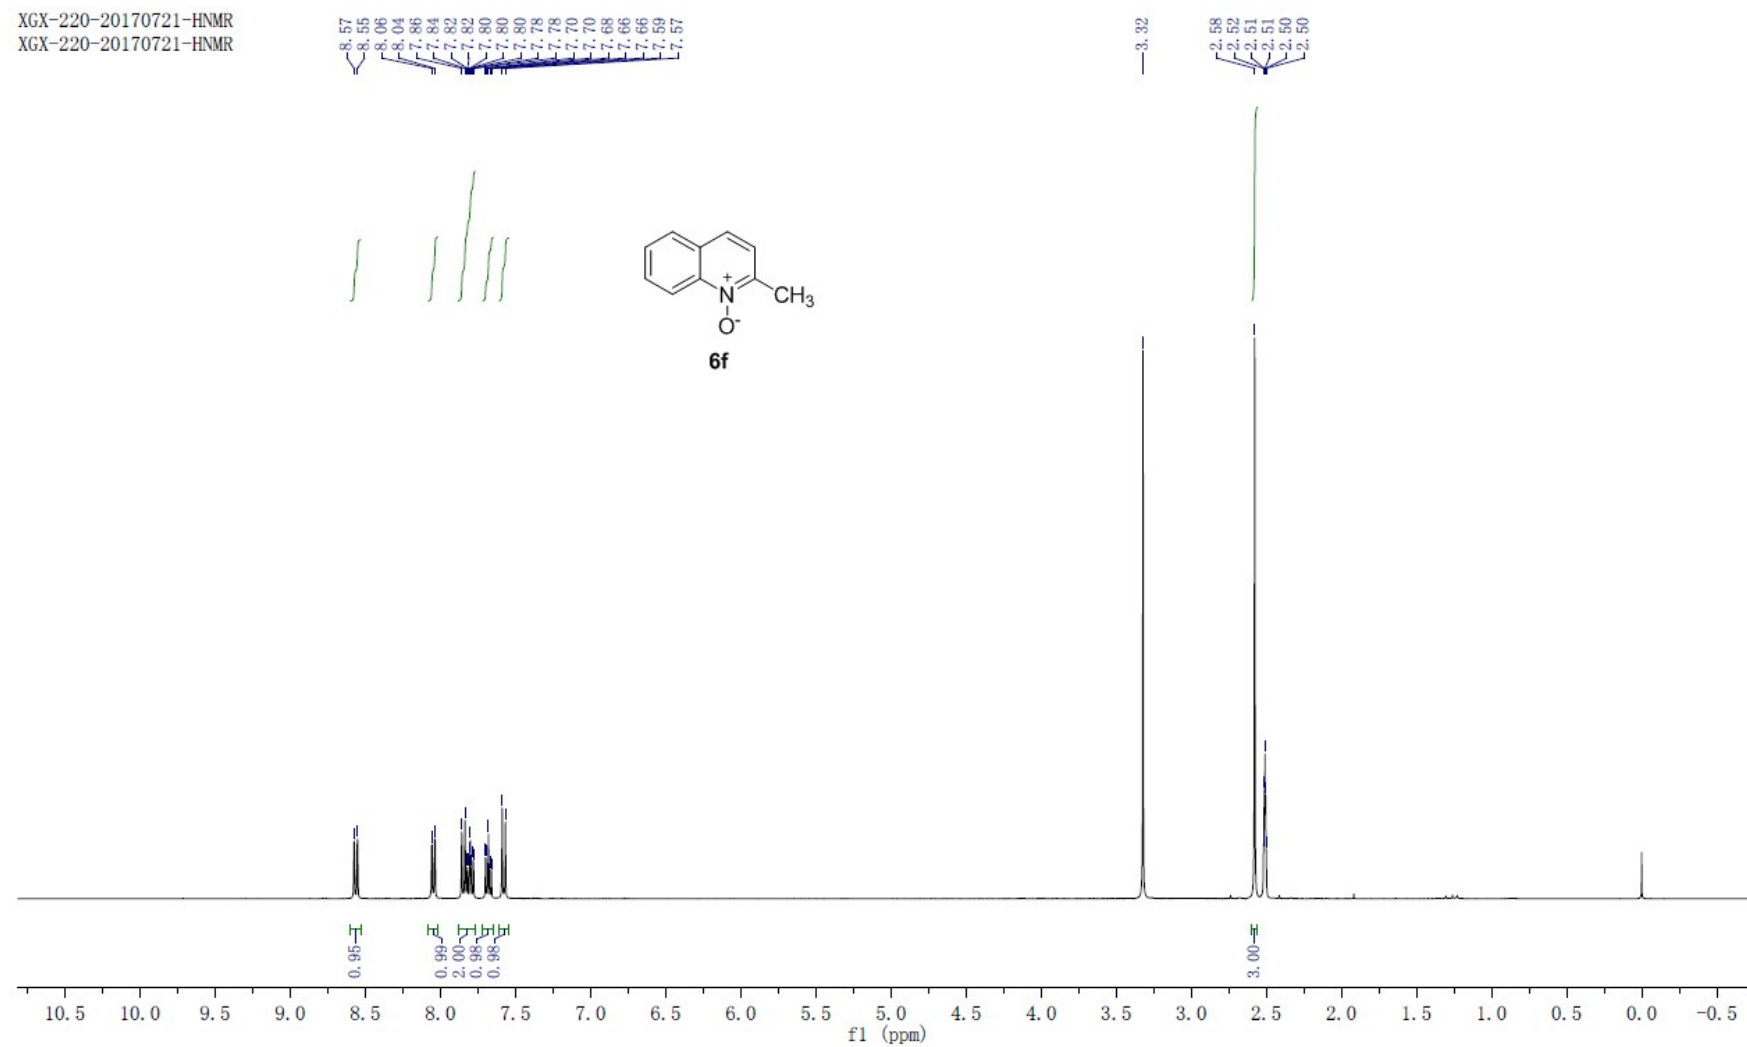

XGX-525-20170721-HNMR  
XGX-525-20170721-HNMR

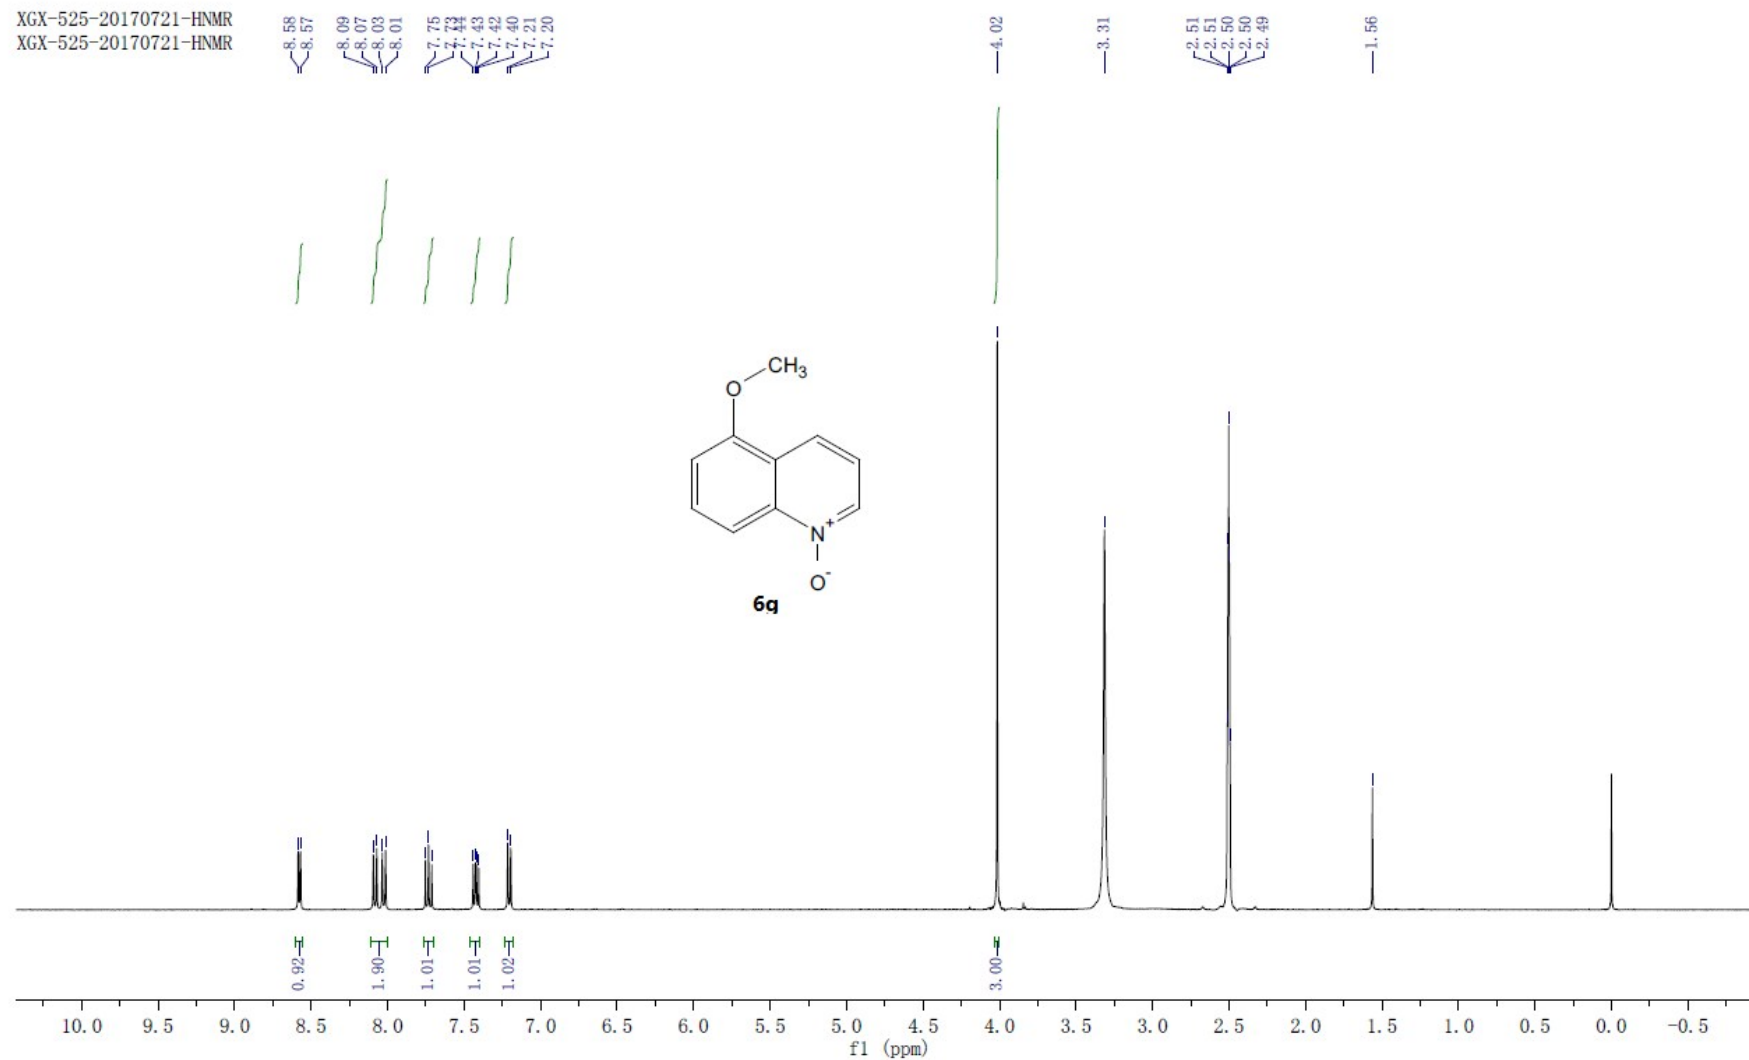



XGX-708-20170721-HNMR  
XGX-708-20170721-HNMR

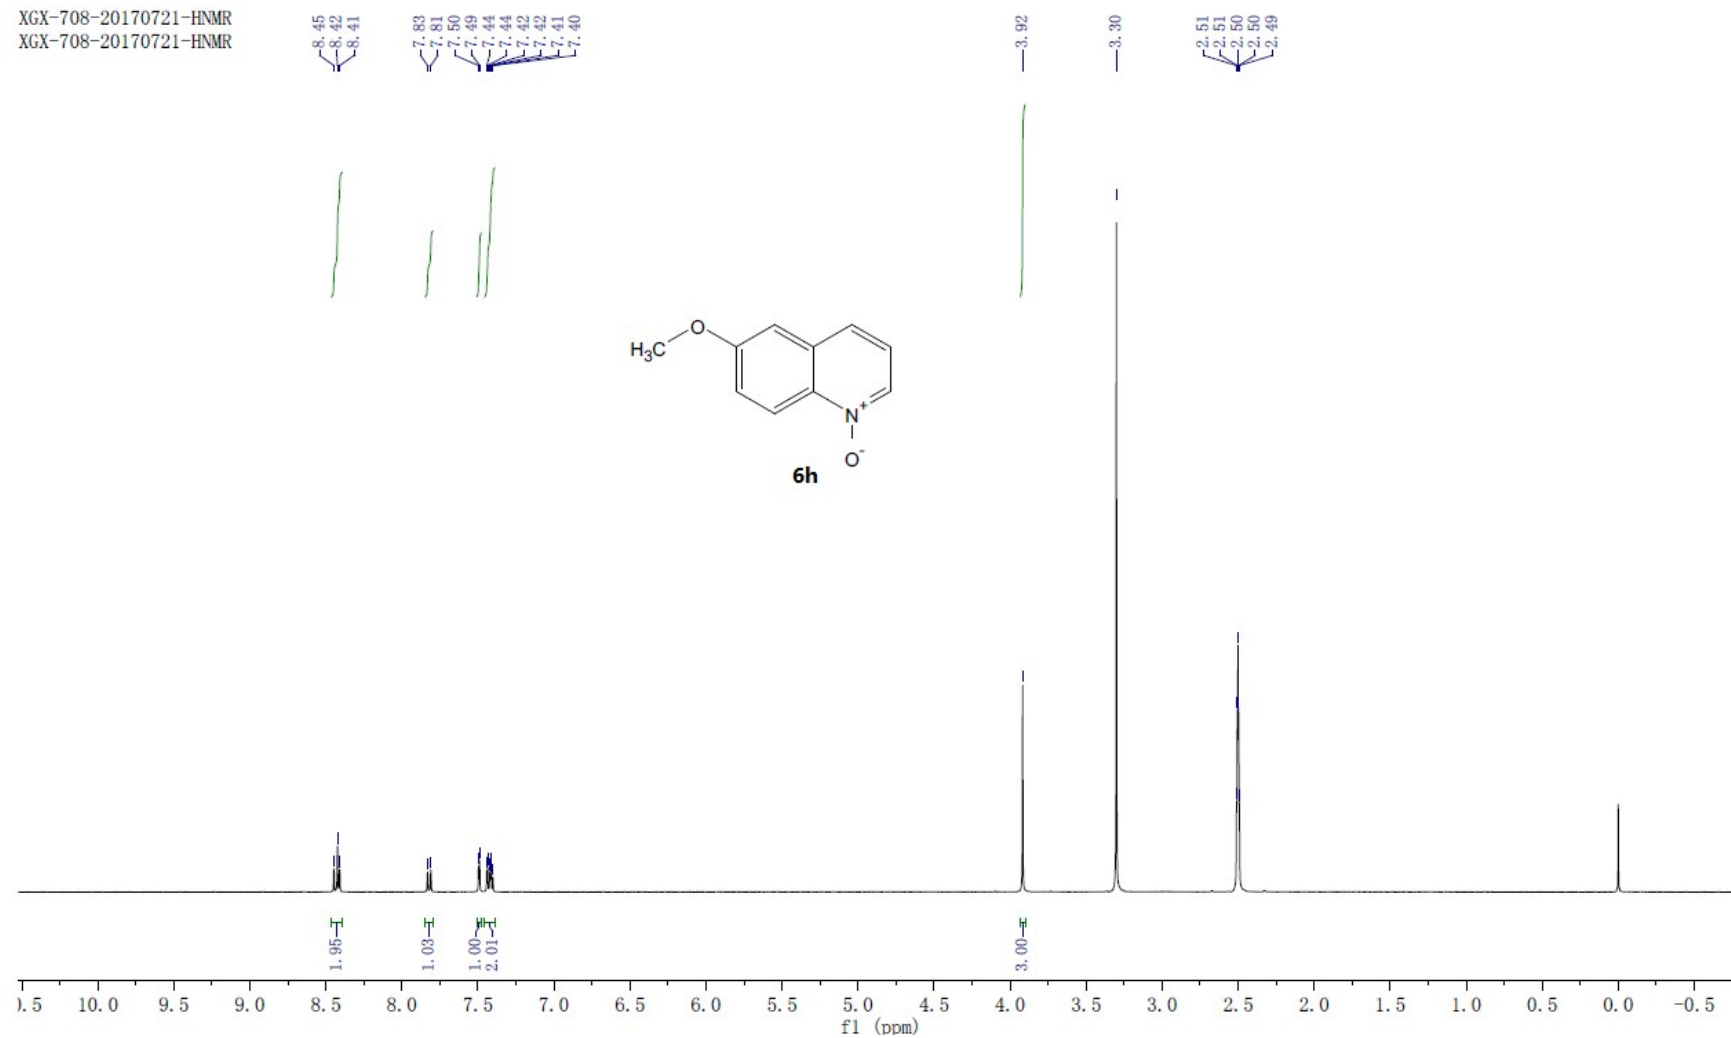

XGX-055-20170818-HNMR

XGX-055-20170818-HNMR

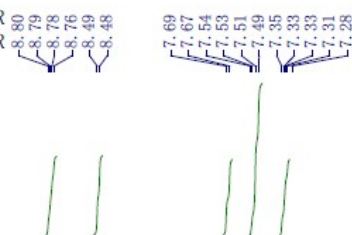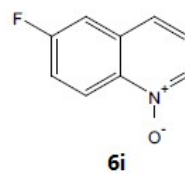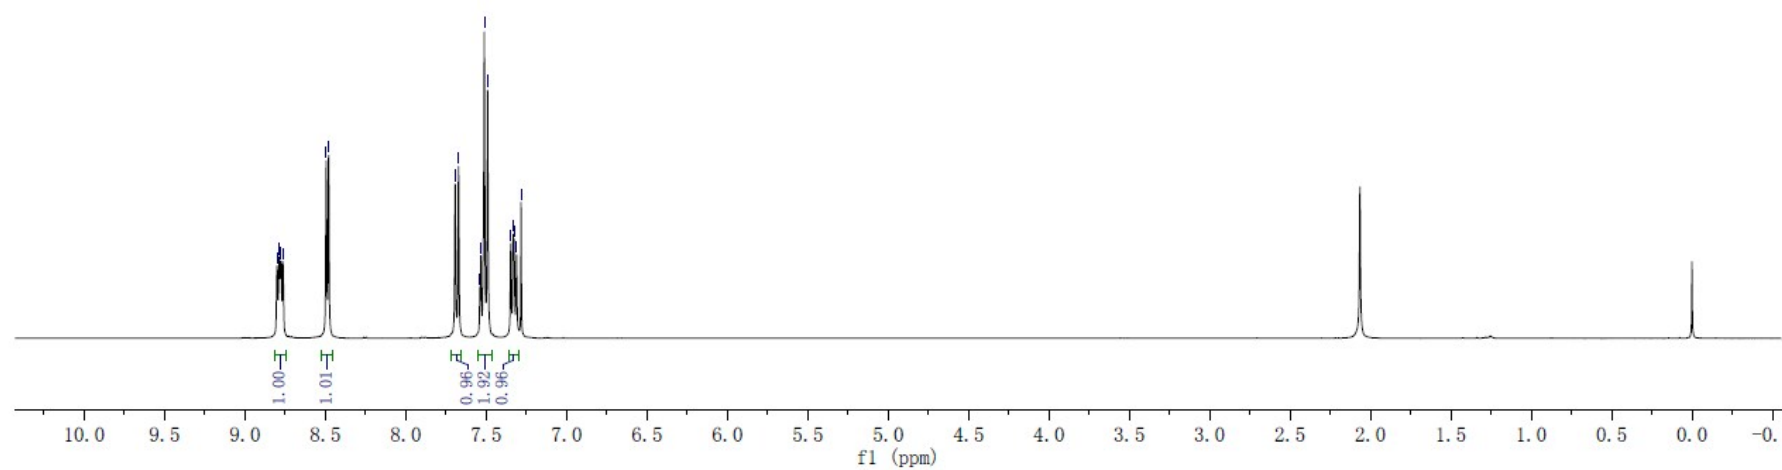

XGX-601-20170721-HNMR  
XGX-601-20170721-HNMR

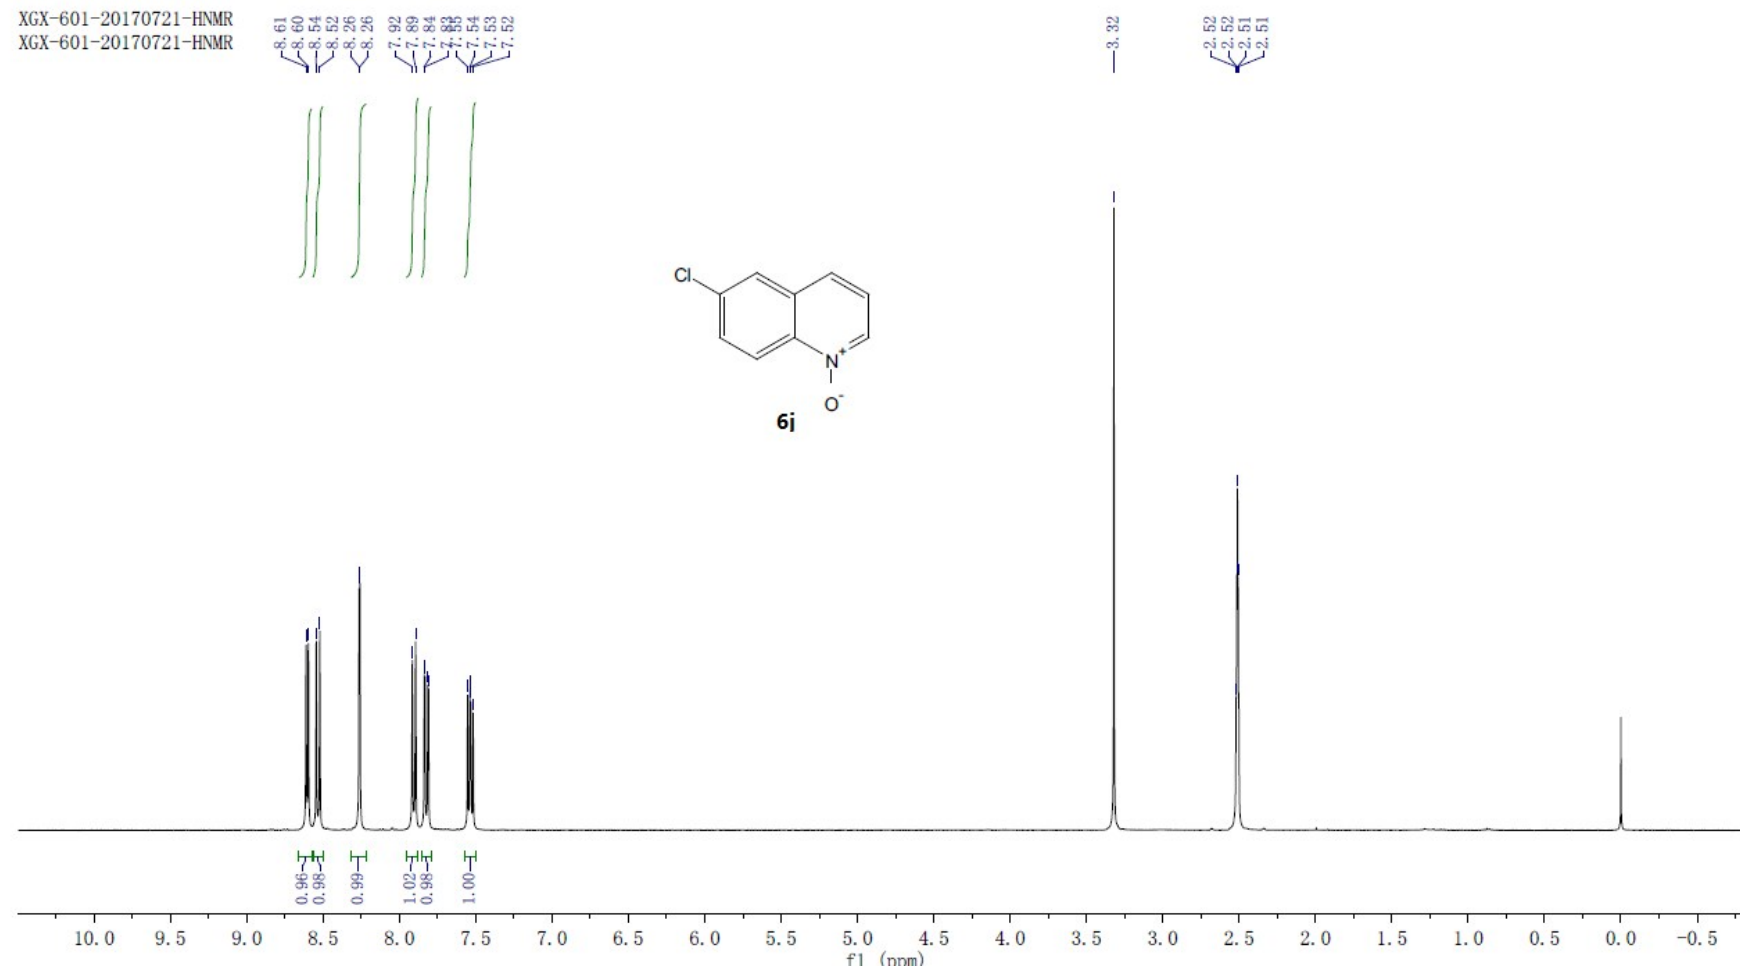

XGX-752-20170721-HNMR  
XGX-752-20170721-HNMR

8.69  
8.69  
8.63  
8.62  
8.09  
8.07  
7.98  
7.96  
7.92  
7.88  
7.53  
7.52  
7.51

3.30

2.51  
2.51  
2.50  
2.50  
2.50

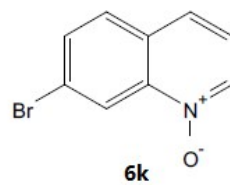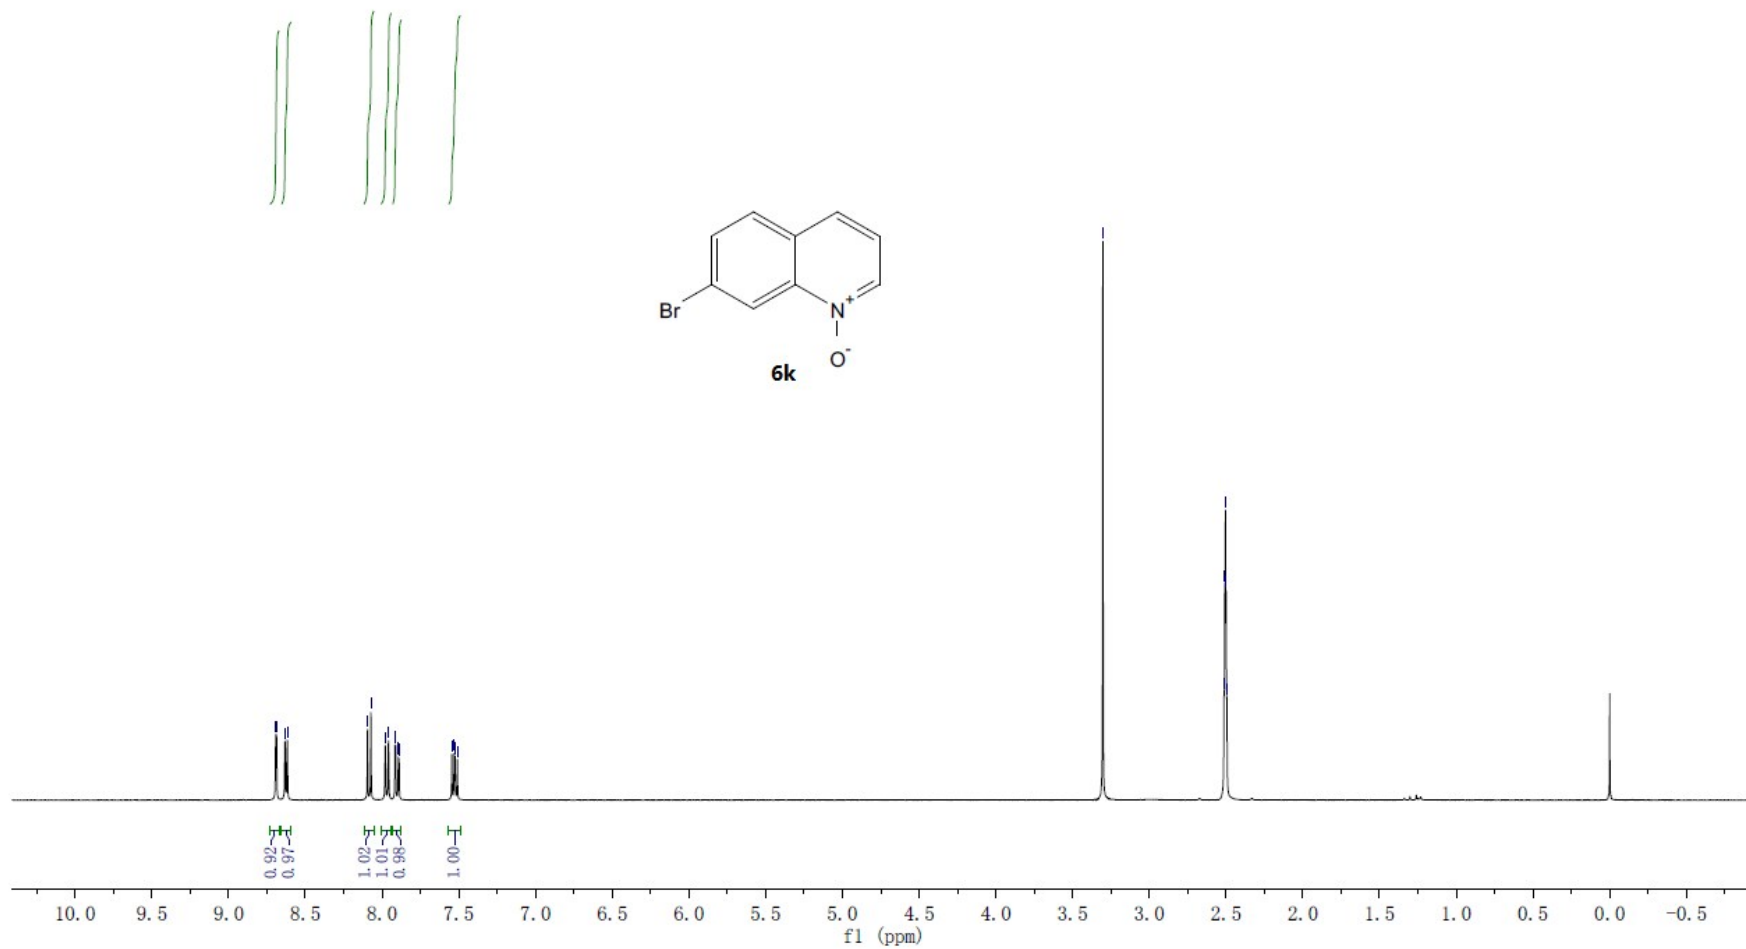

XGX-313-20170721-HNMR  
XGX-313-20170721-HNMR

8.86  
8.85  
8.49  
8.47  
8.29  
8.06  
8.04  
7.87  
7.85  
7.85  
7.84  
7.83  
7.83  
7.80  
7.80  
7.78  
7.76  
7.76

3.35

2.53  
2.53  
2.52  
2.52

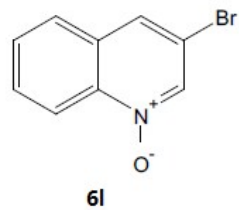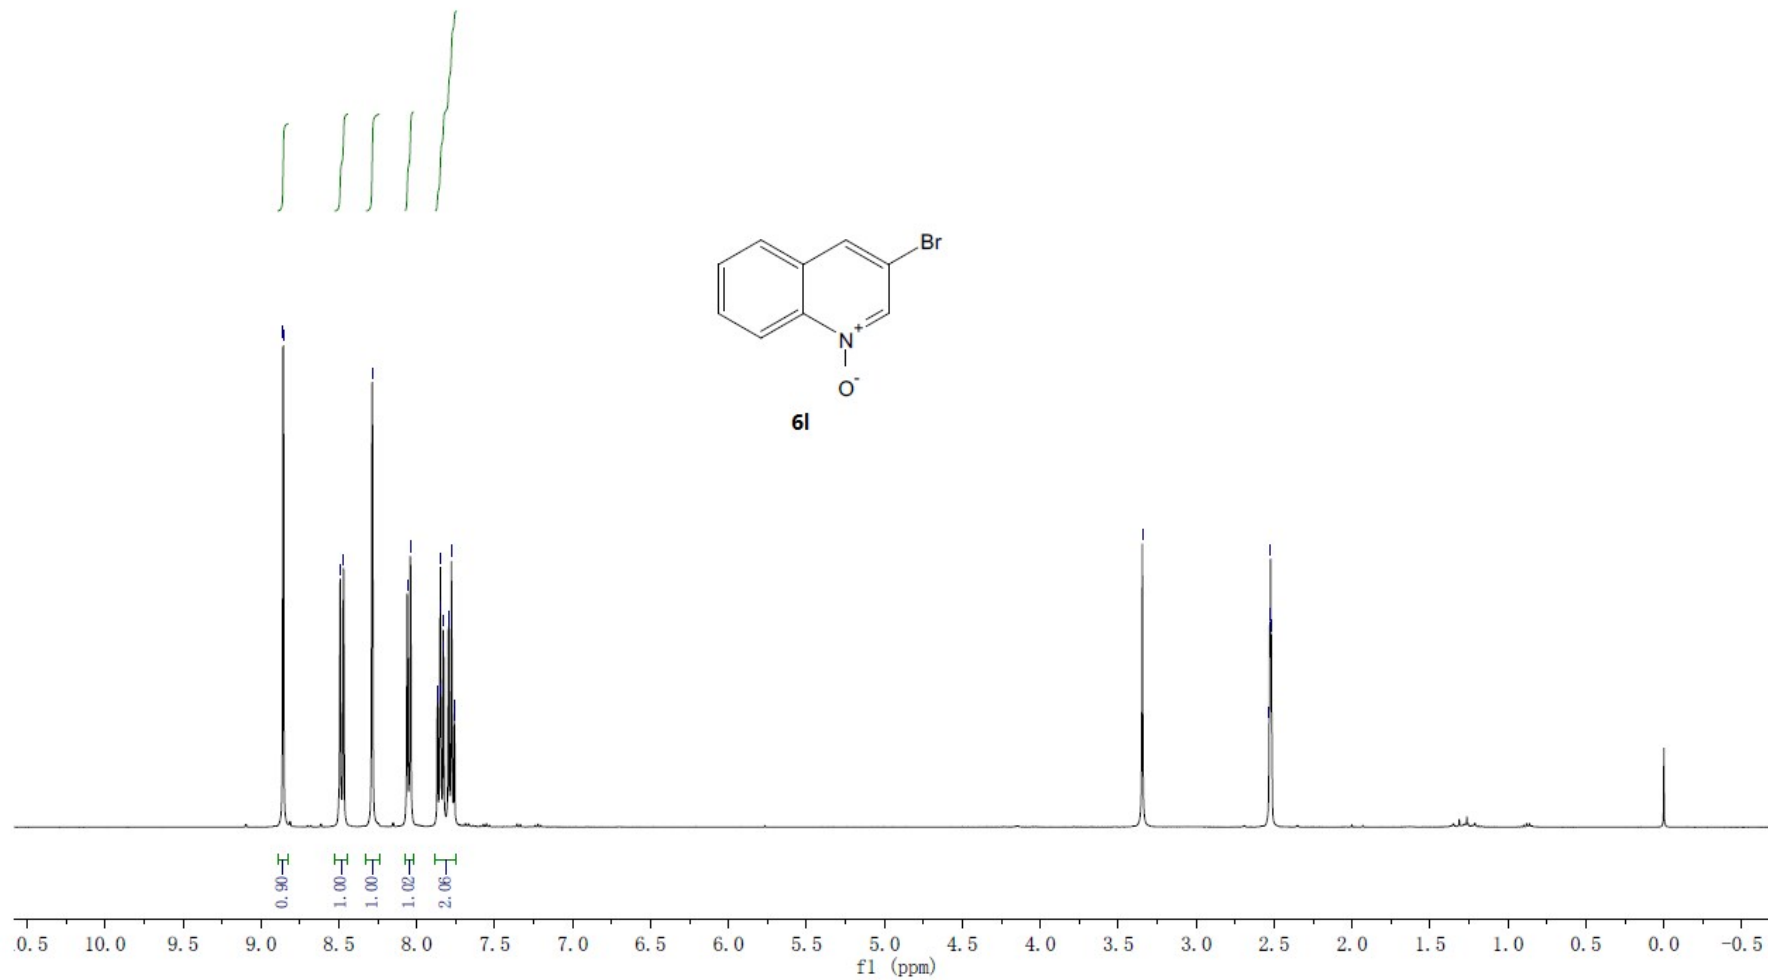

XGX-625-20170721-HNMR  
XGX-625-20170721-HNMR

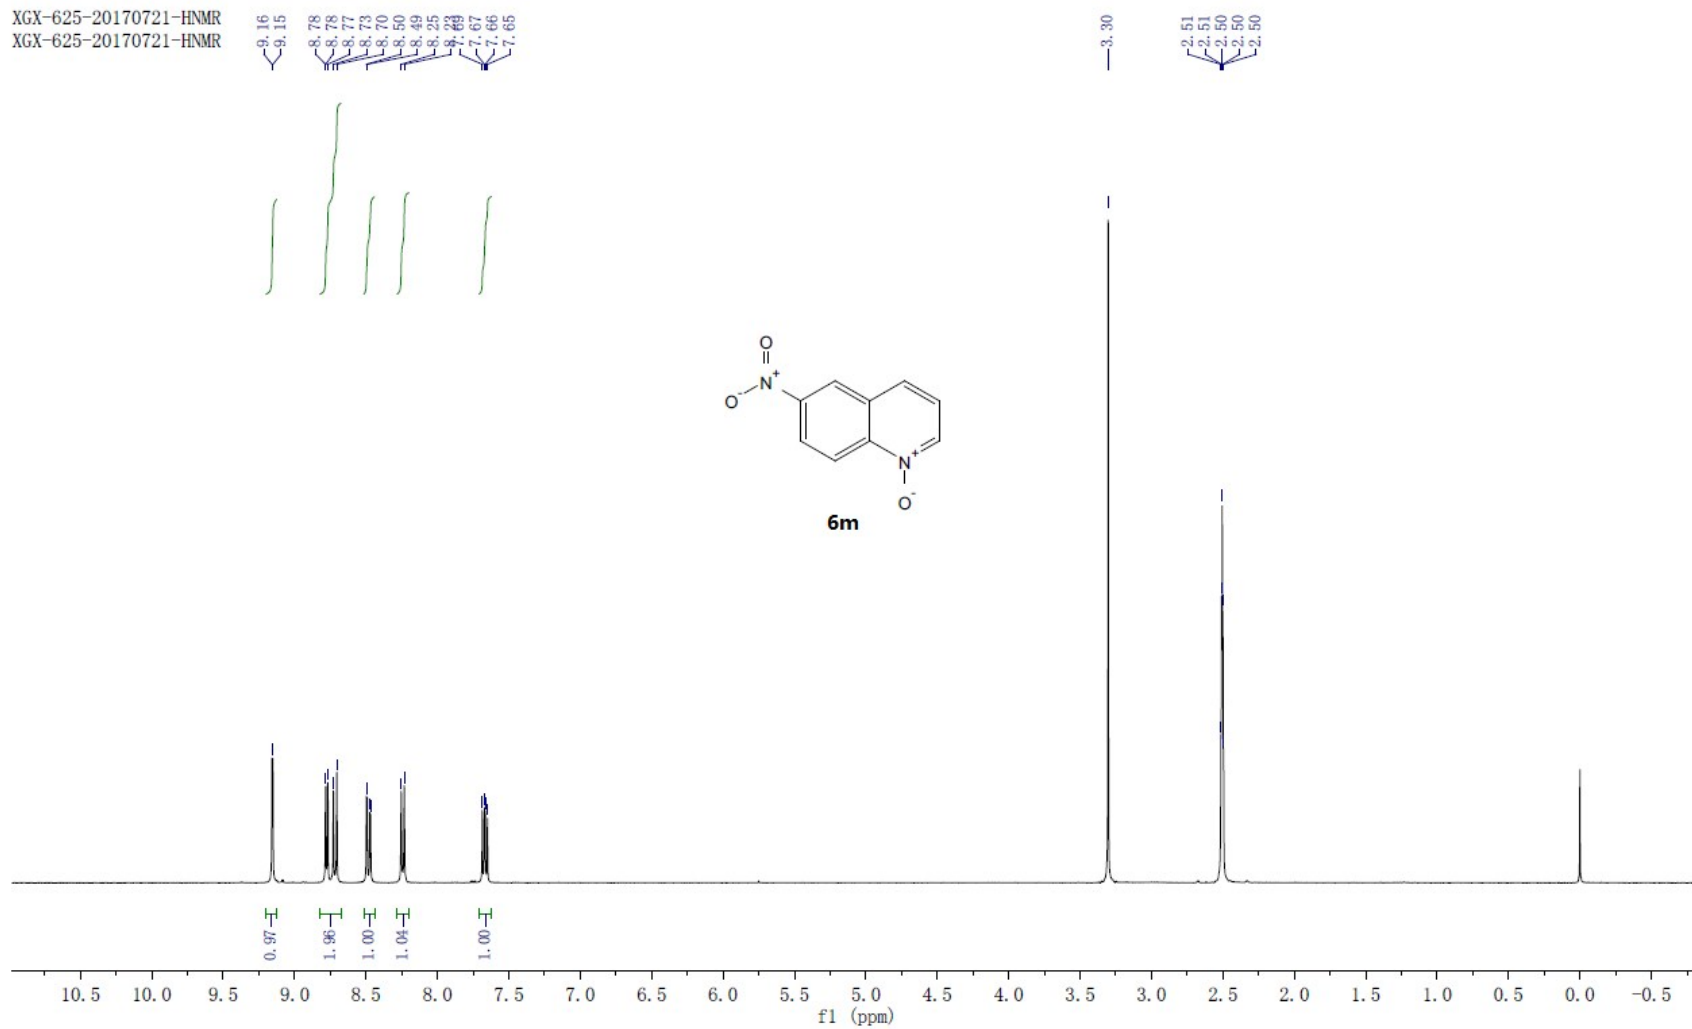

XGX-7bj-20171020-HNMR  
XGX-7bj-20171020-HNMR

8.79 8.66 8.65 8.20 8.18 8.10 7.97 7.88 7.86 7.86 7.58 7.57 7.55 7.52 7.50 7.50 7.49 7.49 7.48 7.47 7.47

3.40

2.54 2.53 2.53

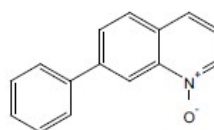

**6n**

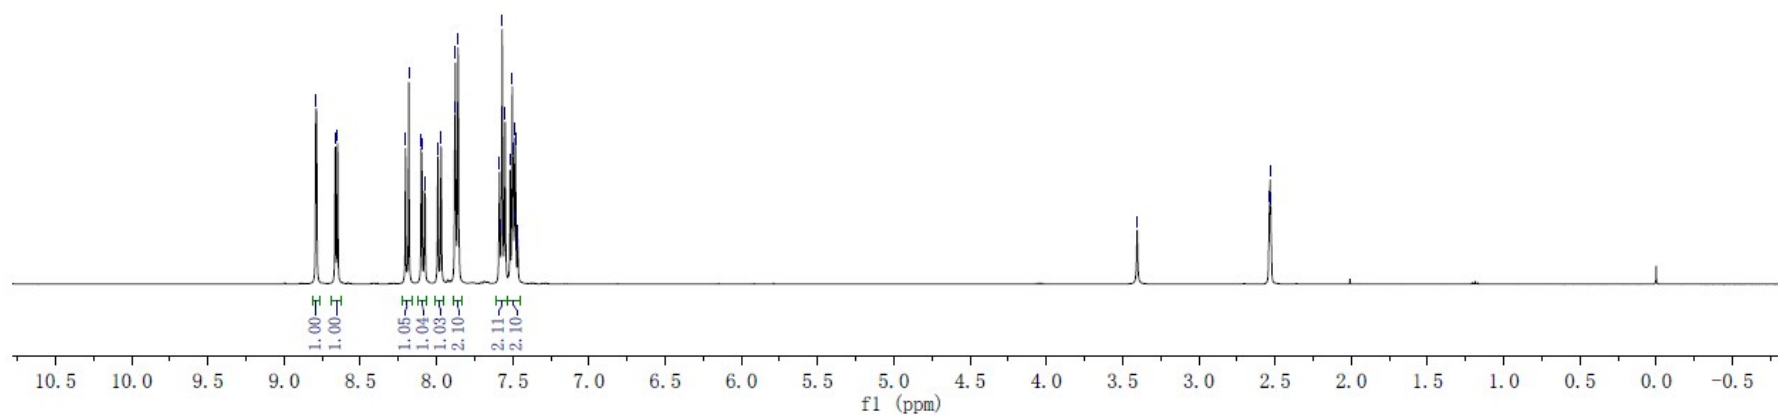

xgx072

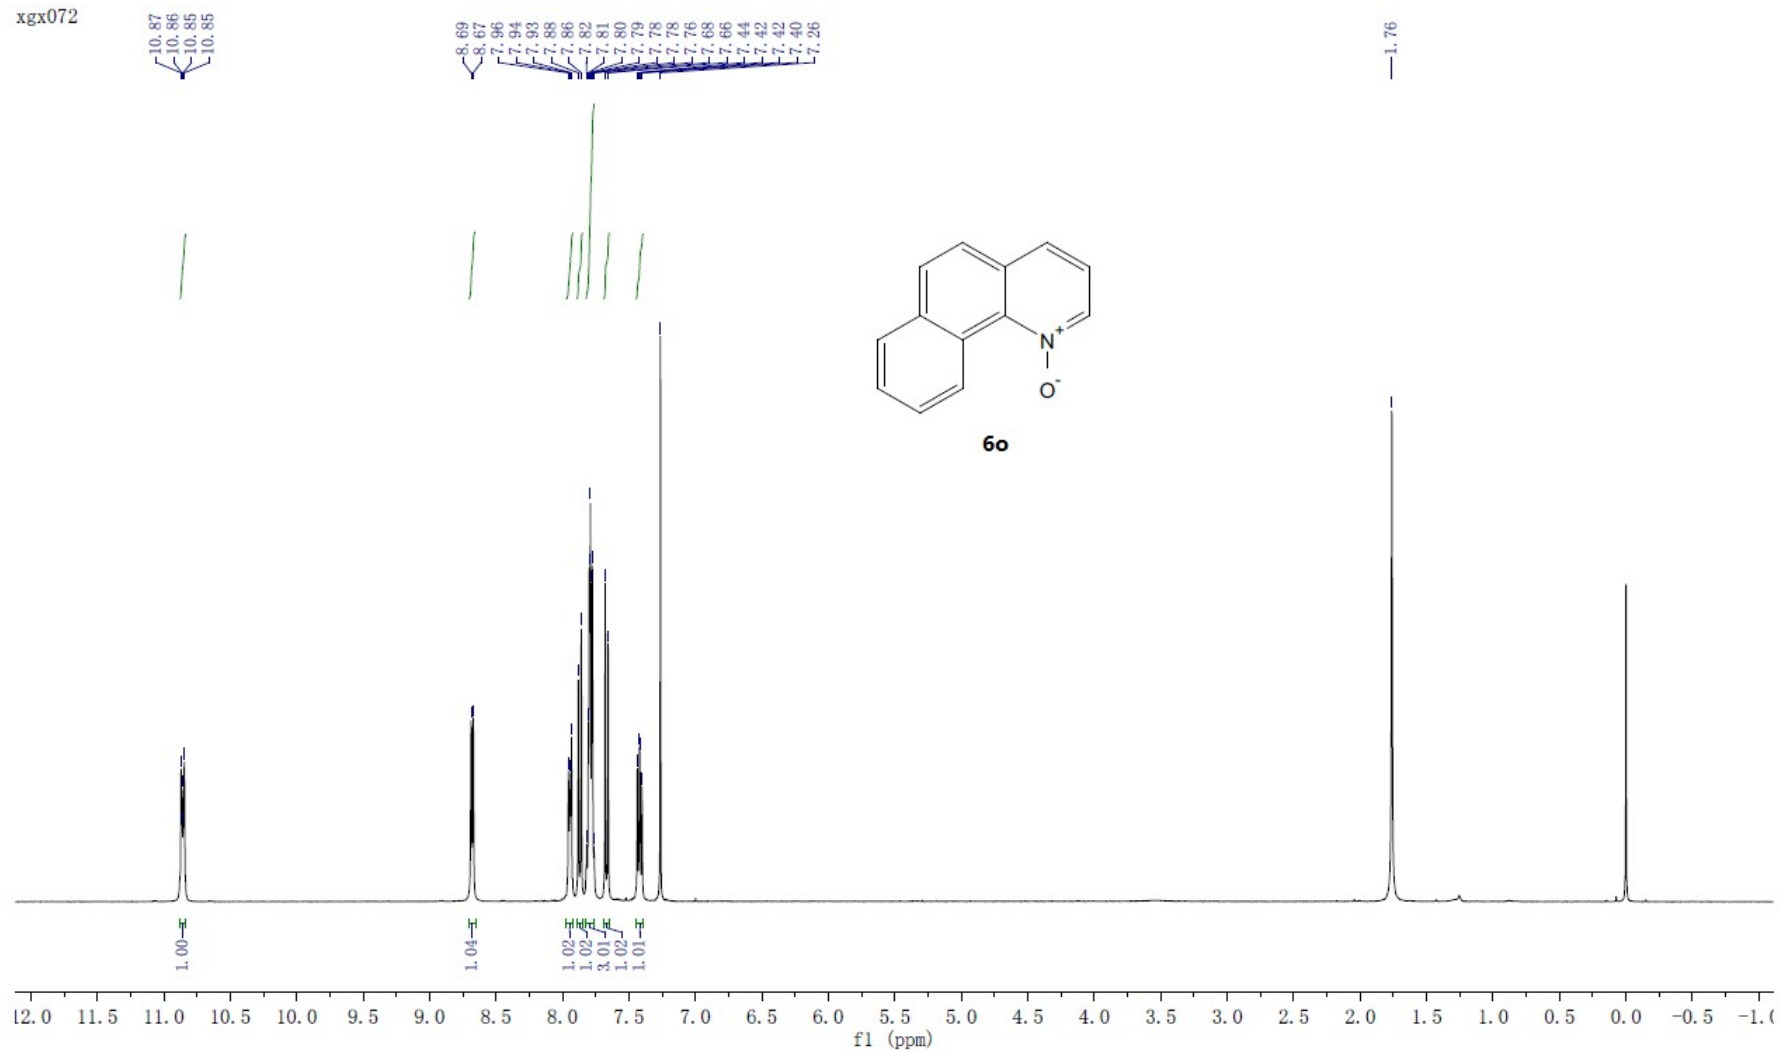



GX-198

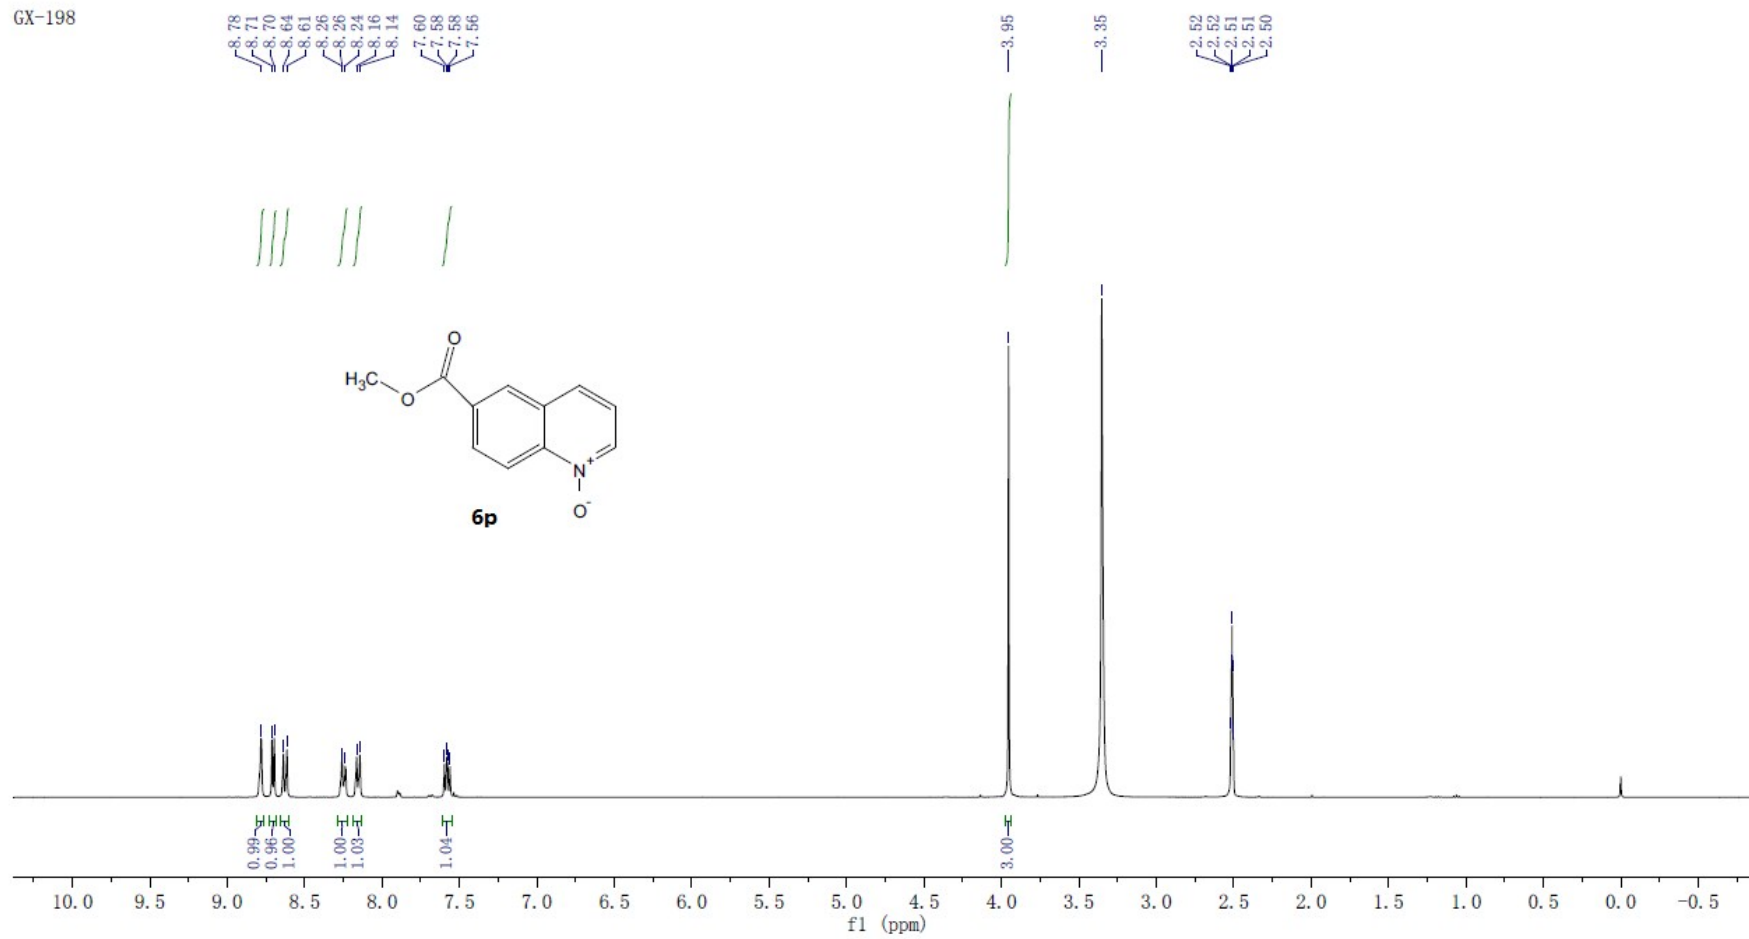

XGX-1796-20170906-HNMR  
XGX-1796-20170906-HNMR

8.74  
8.71  
8.49  
8.47  
8.01  
7.99  
7.99  
7.85  
7.74  
7.71  
7.58  
7.56  
7.42  
7.40  
7.39  
7.34  
7.33  
7.32  
7.31  
7.29  
7.26  
7.25

—1.25

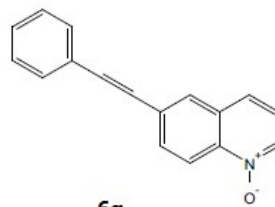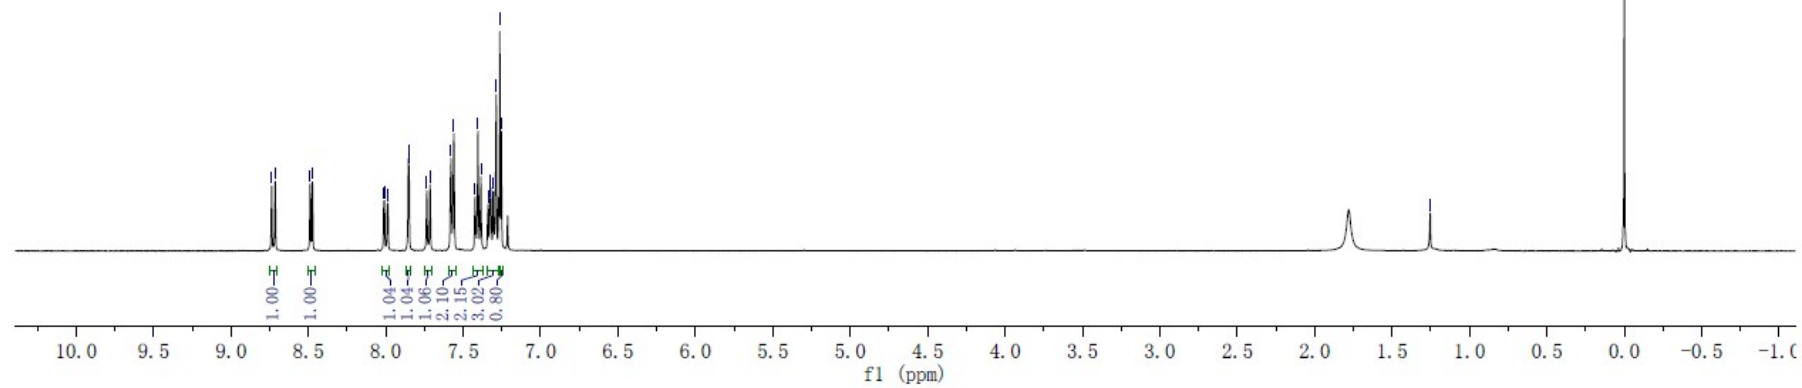

XGX-2485-20170912-HNMR  
XGX-2485-20170912-HNMR

8.63  
8.62  
8.57  
8.55  
8.36  
7.97  
7.95  
7.85  
7.64  
7.55  
7.54  
7.52  
7.49  
7.49

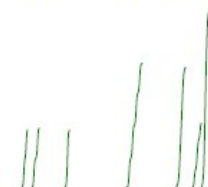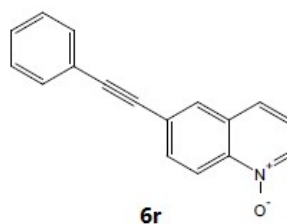

3.36

2.52  
2.52

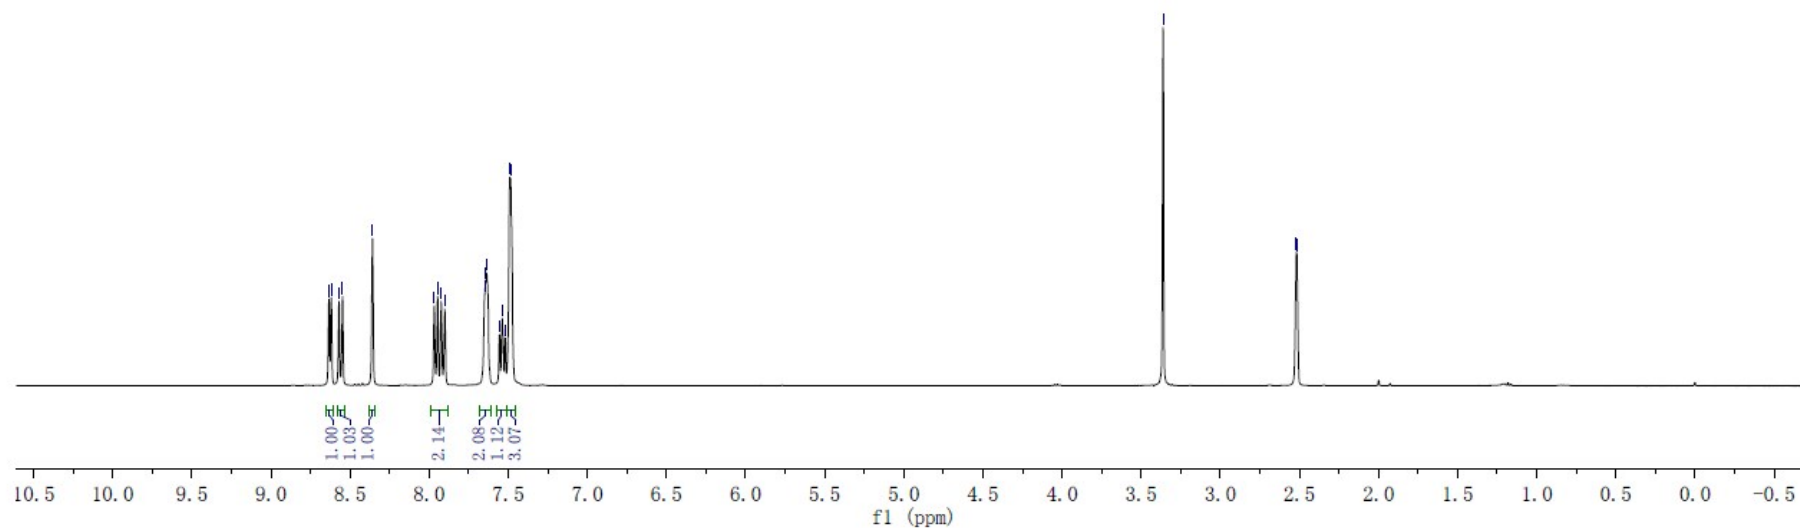

## 7.2 <sup>1</sup>H and <sup>13</sup>C NMR Spectra of Products

GX158-20161108-HNMR  
GX158-20161108-HNMR

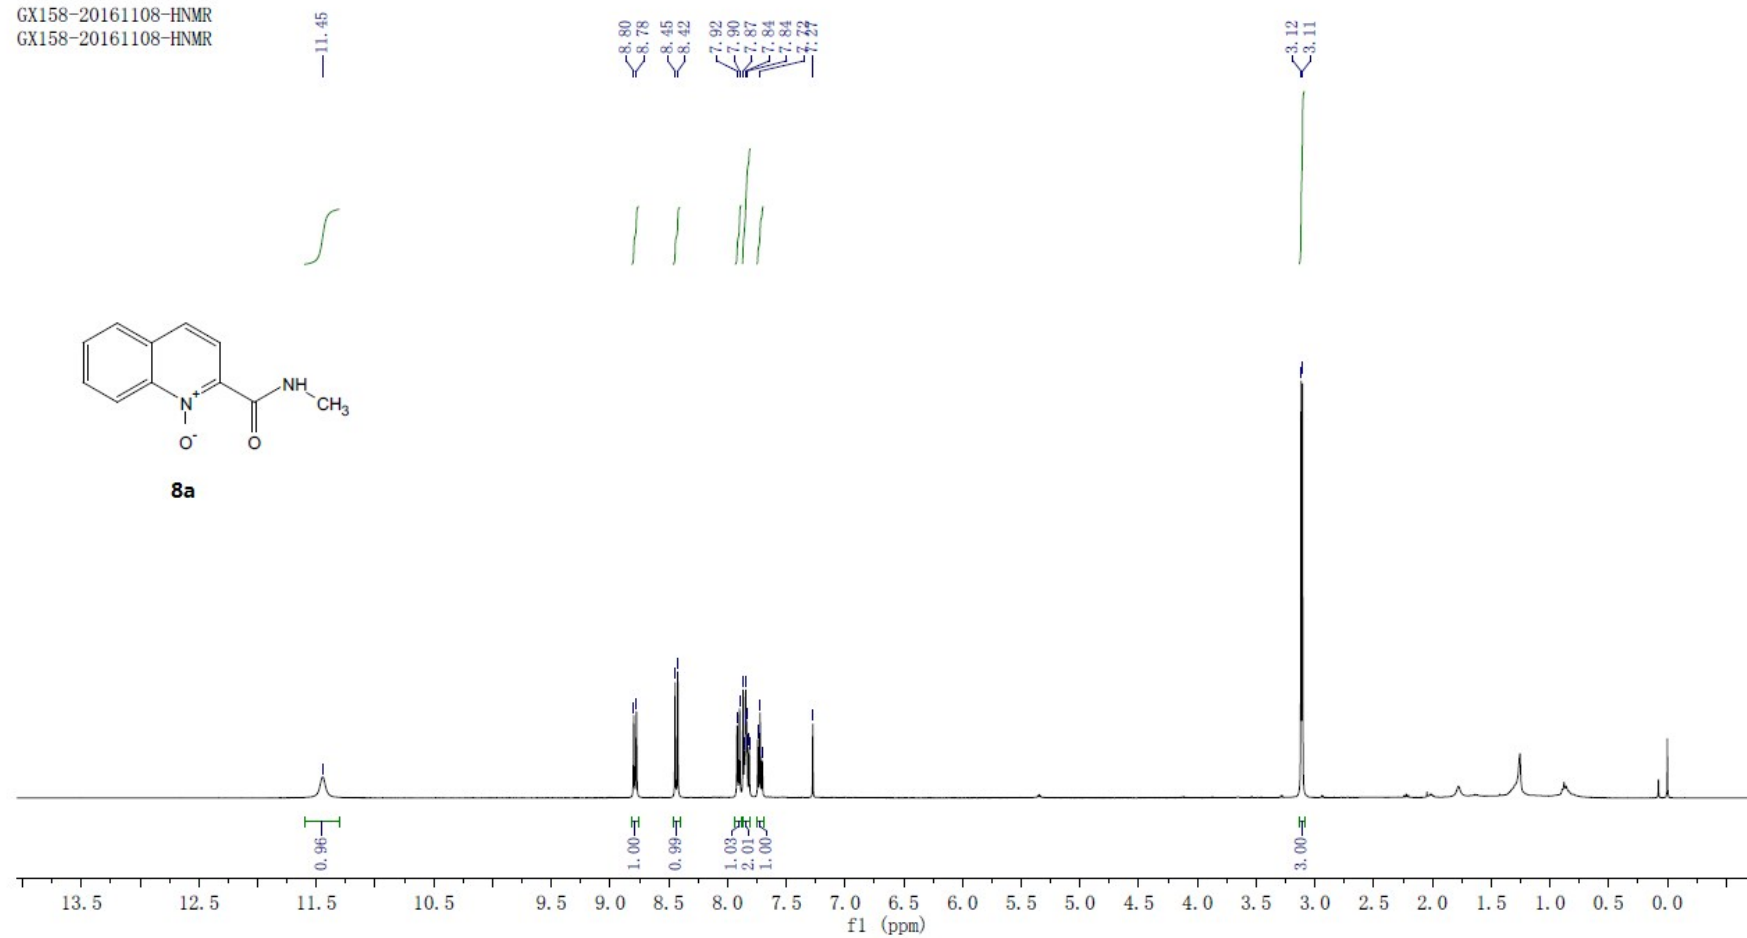

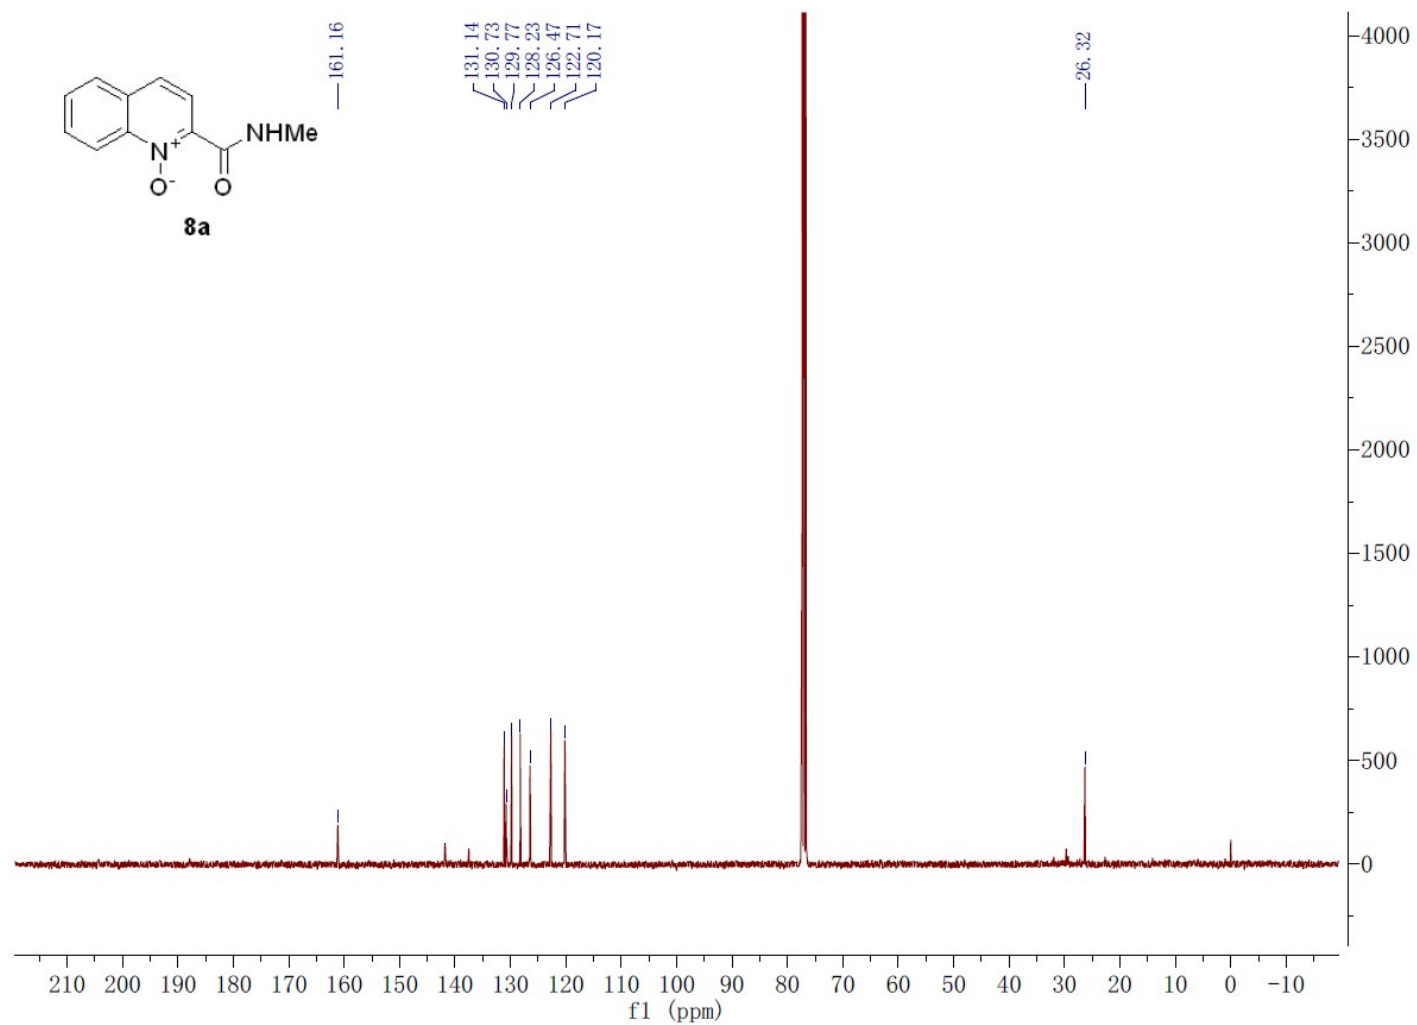

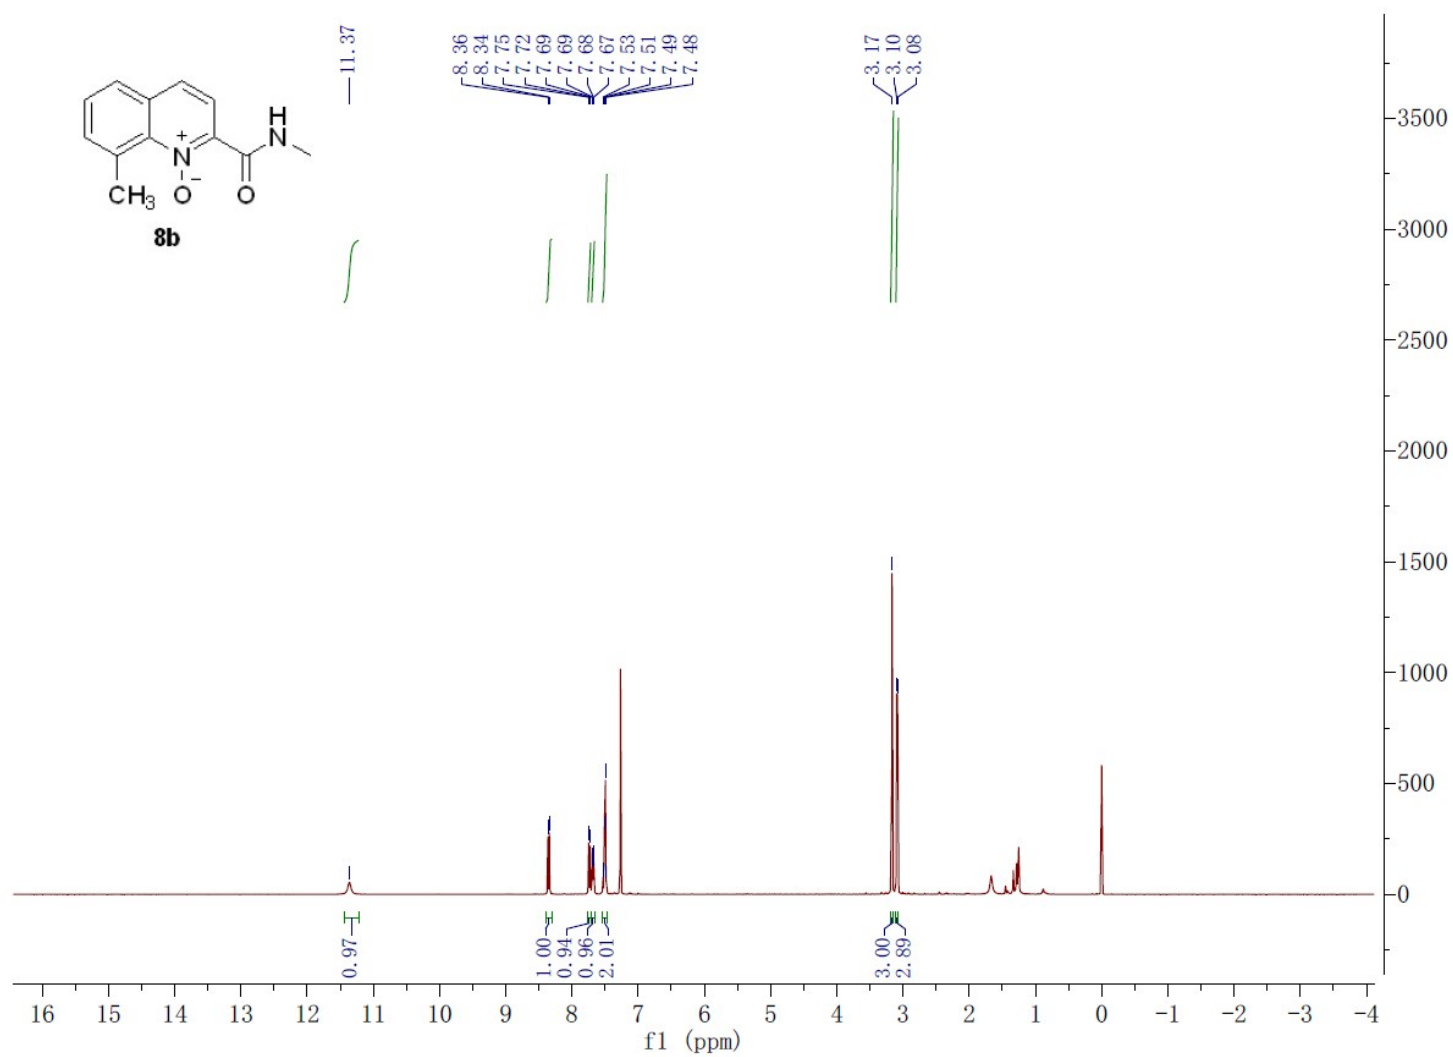

G-630-20170803-CNMR  
G-630-20170803-CNMR

161.57

141.71

138.37

134.32

134.23

132.60

129.15

126.93

126.67

122.58

26.23  
25.66

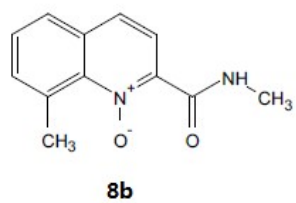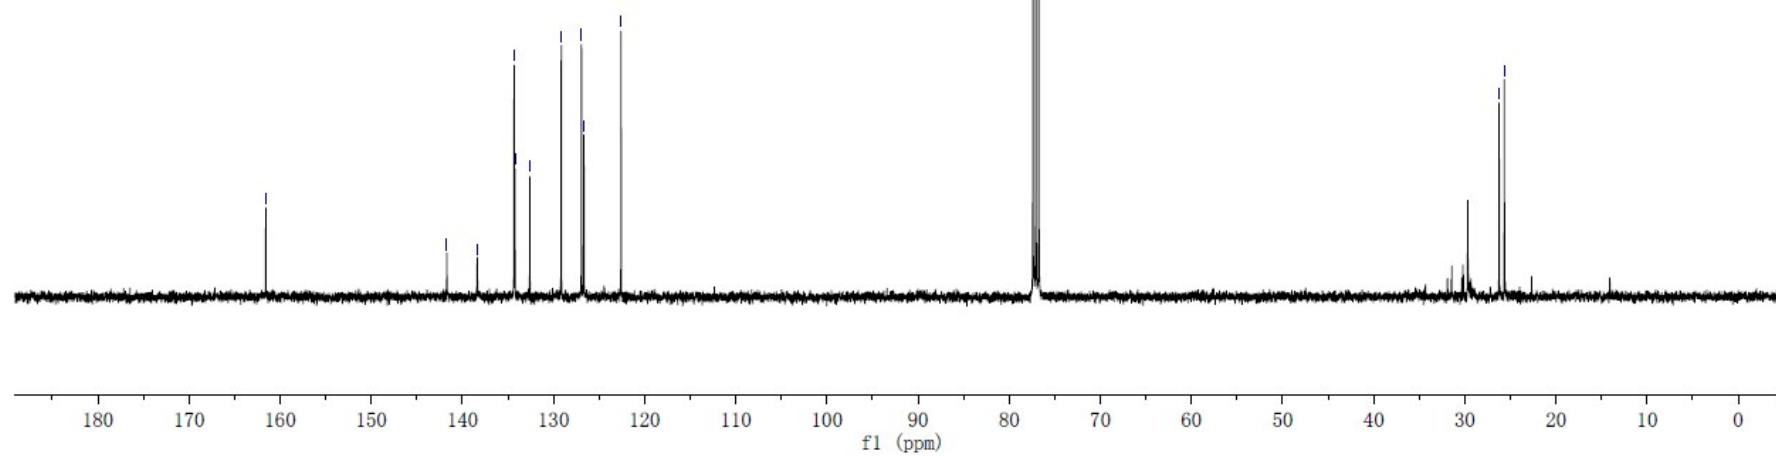

Xa-216

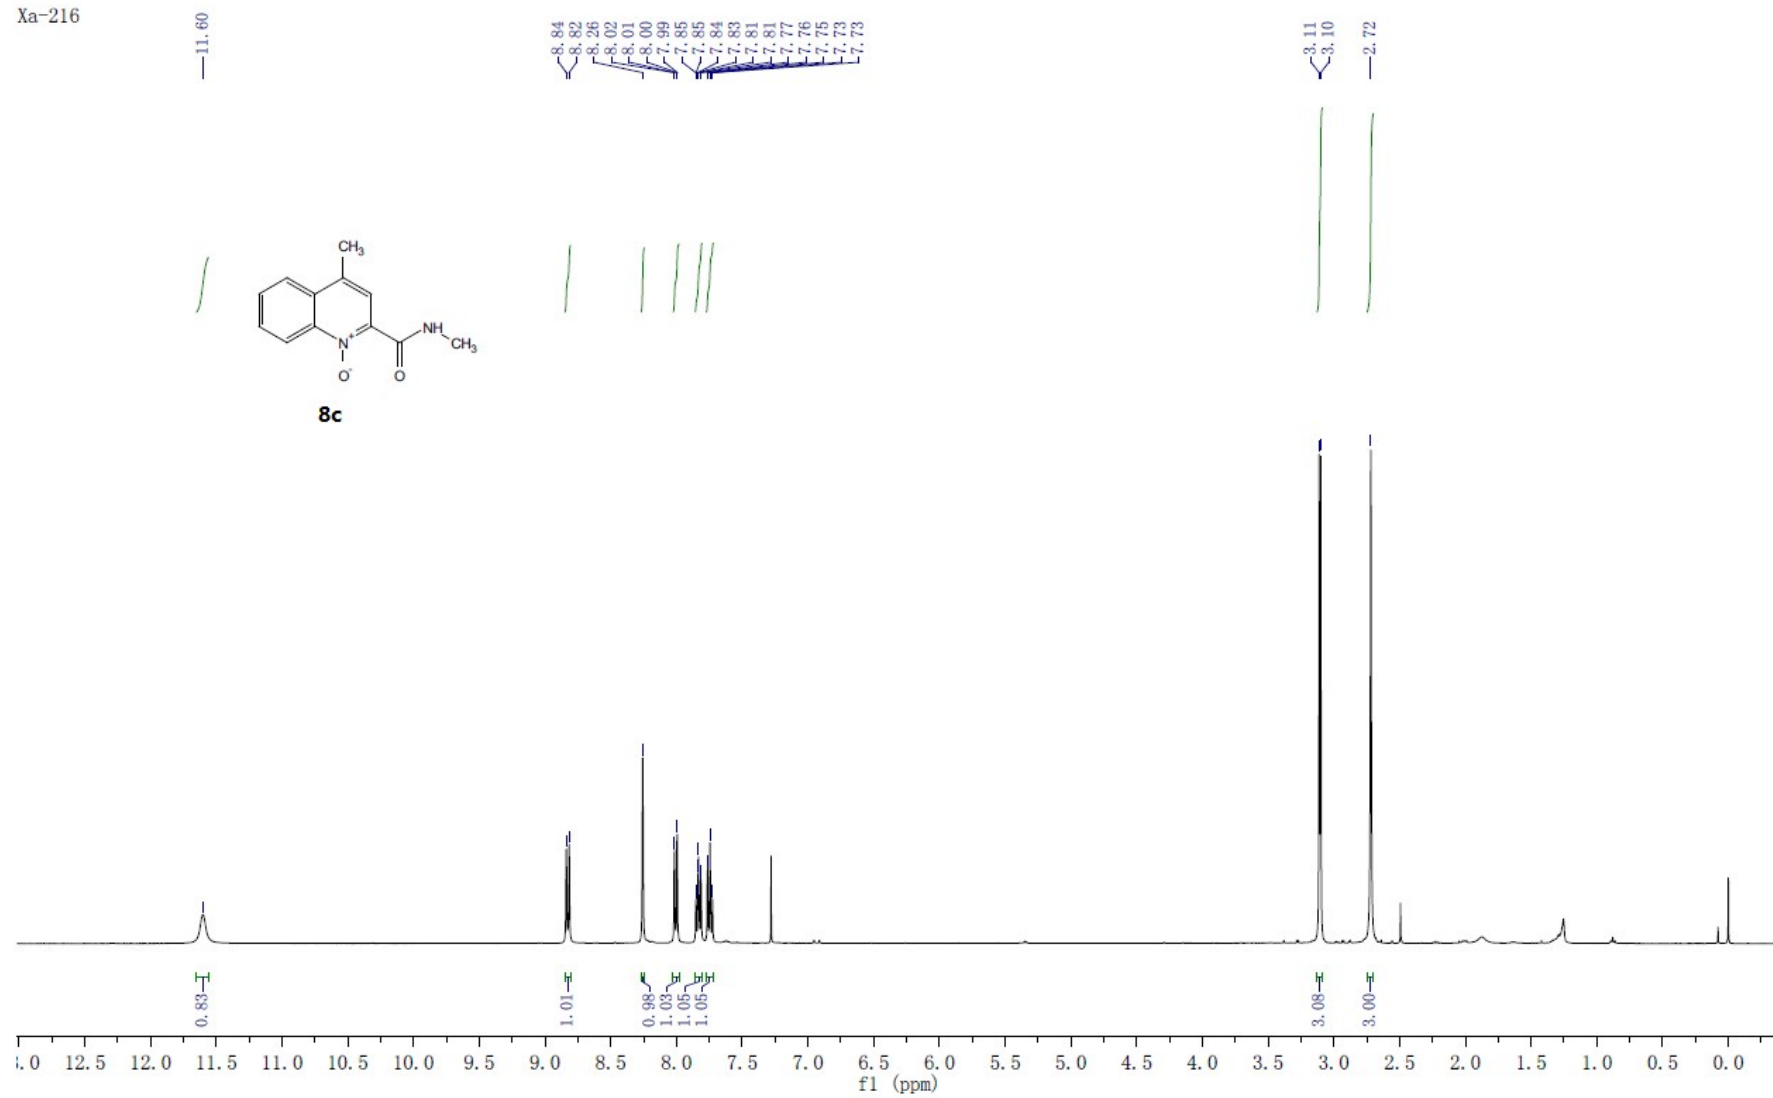



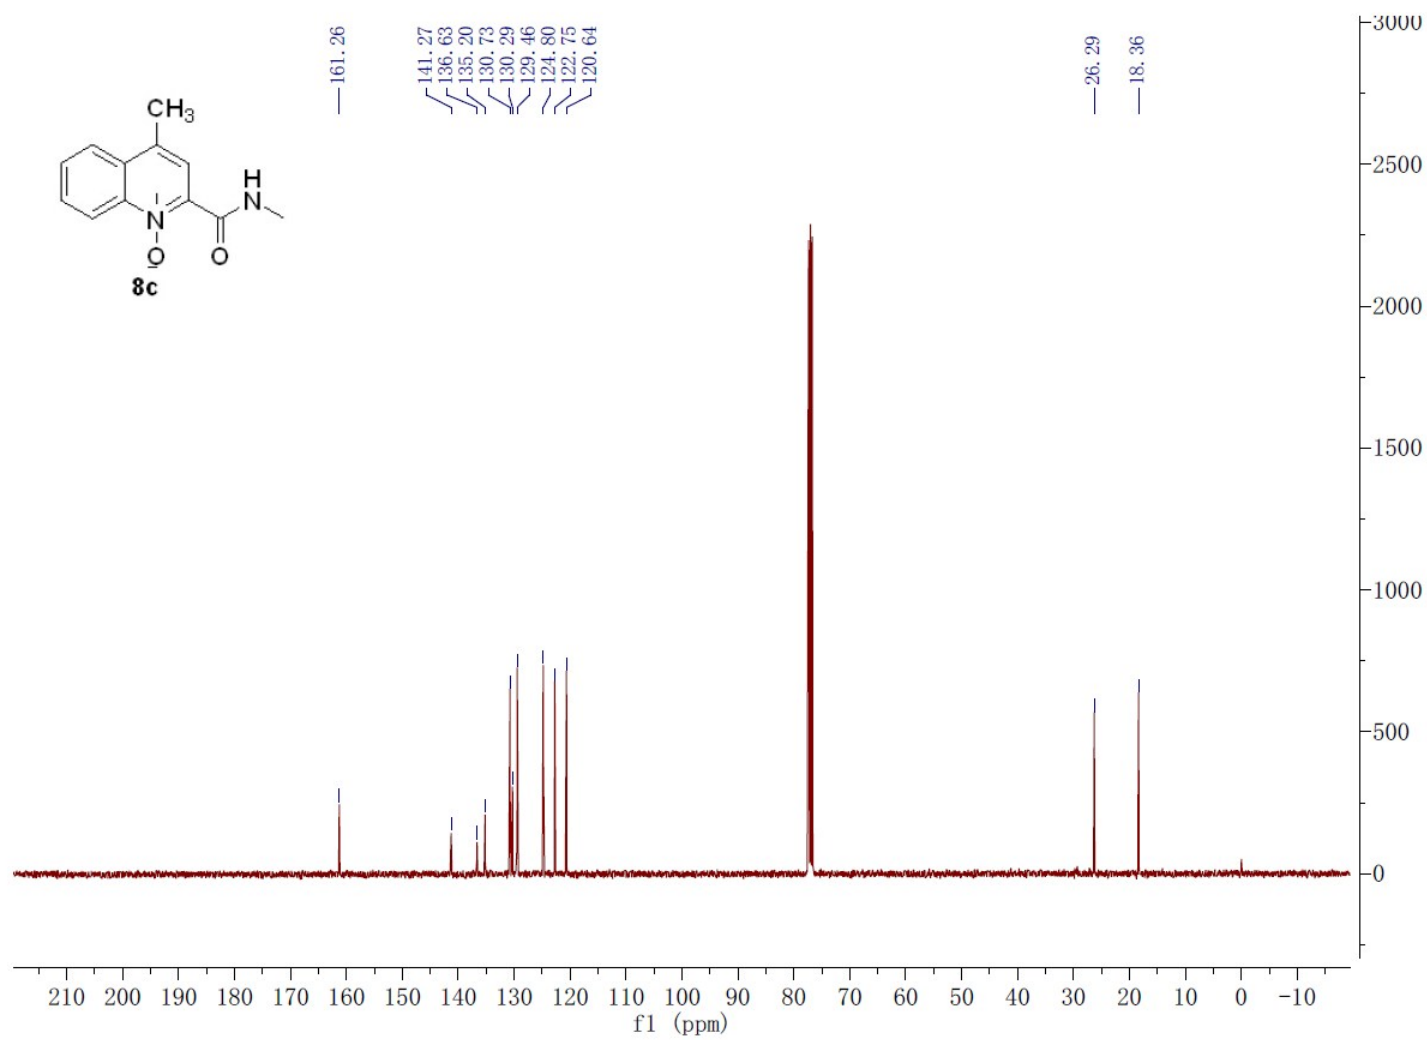

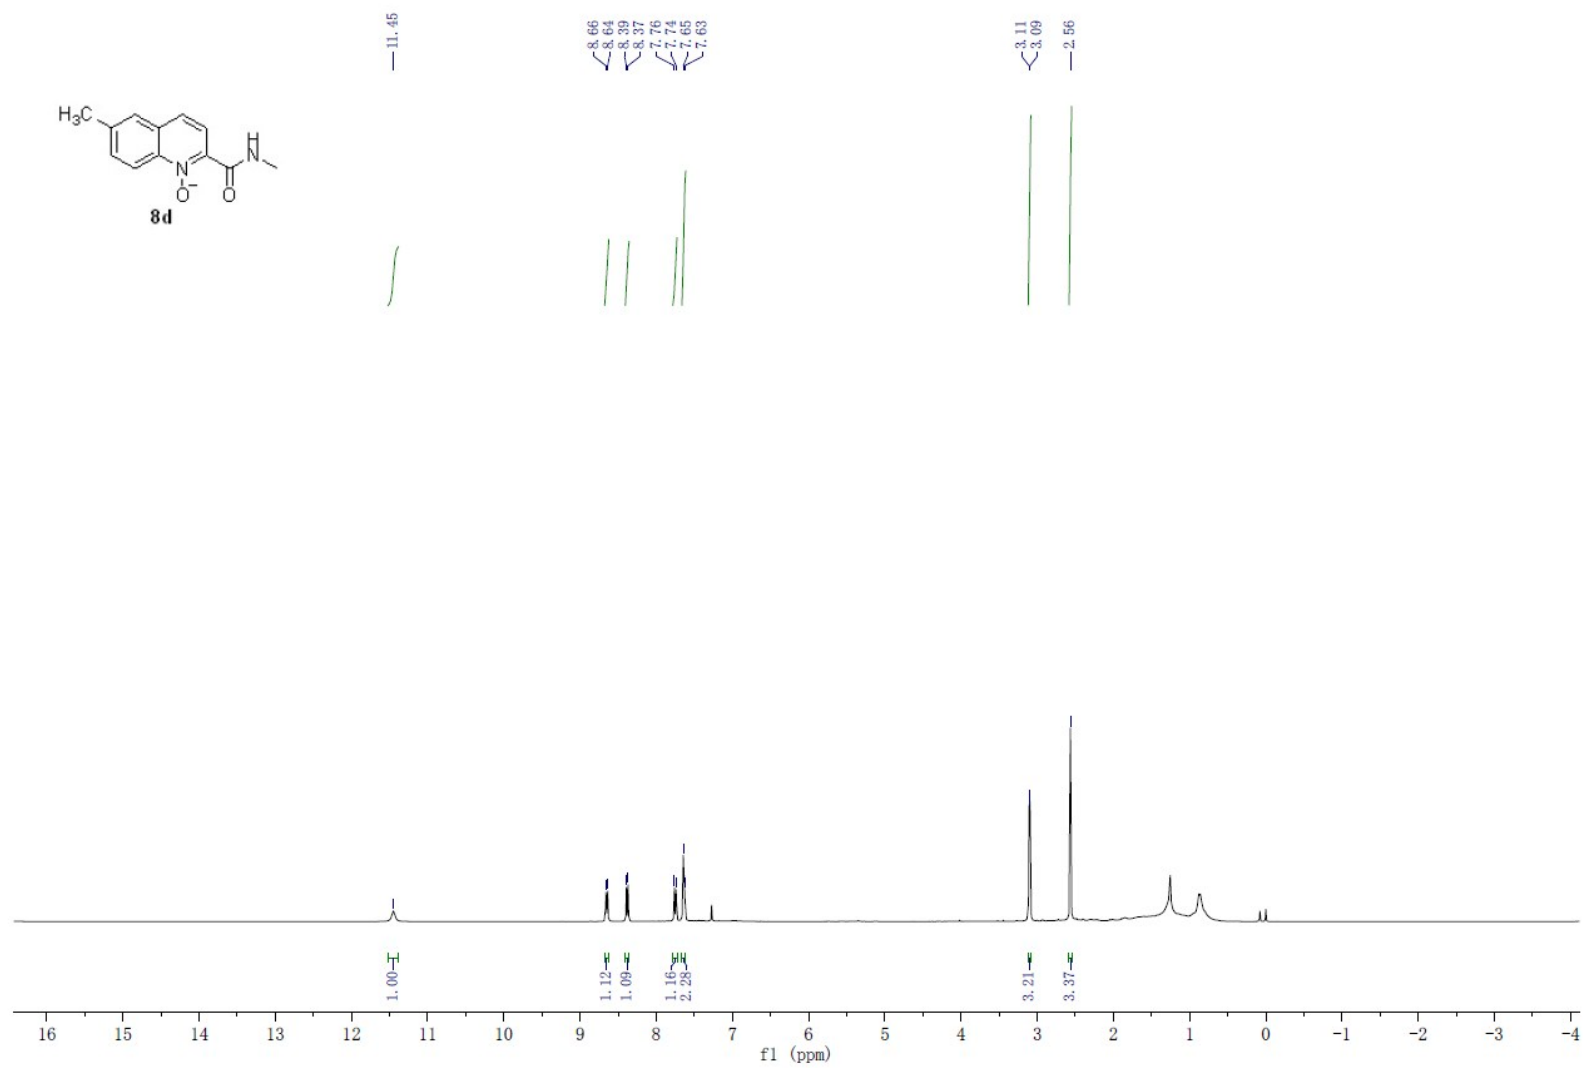

X1713b

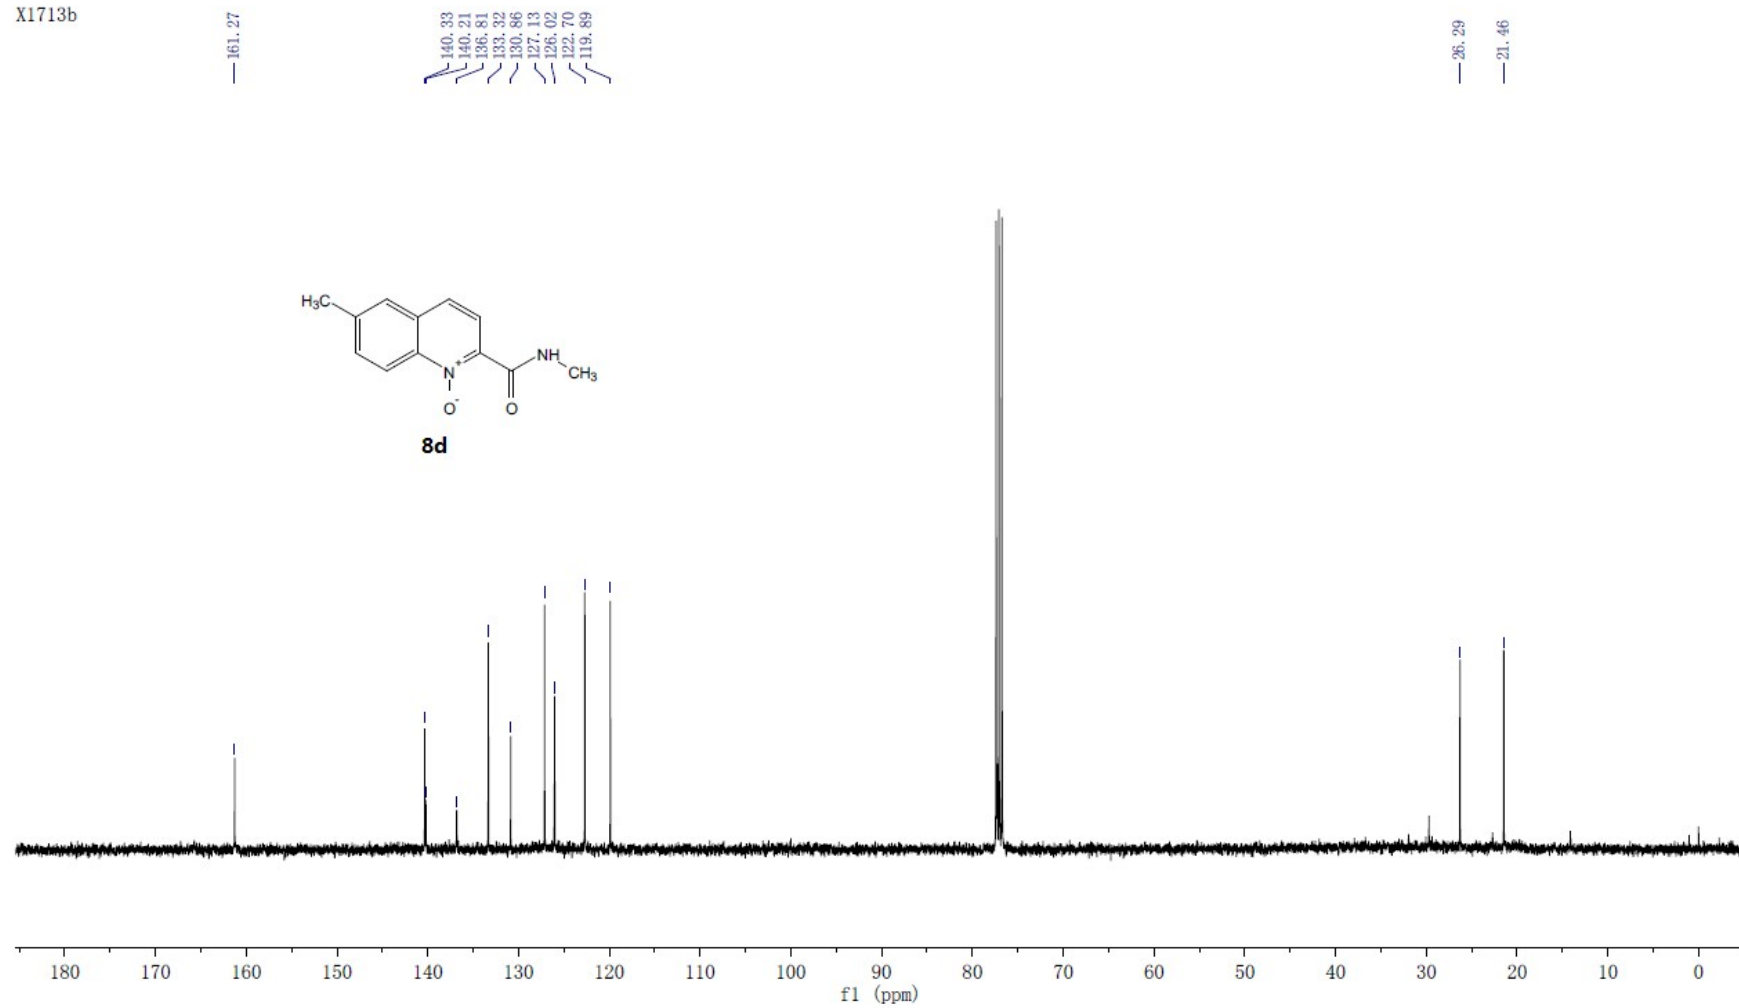

X12142

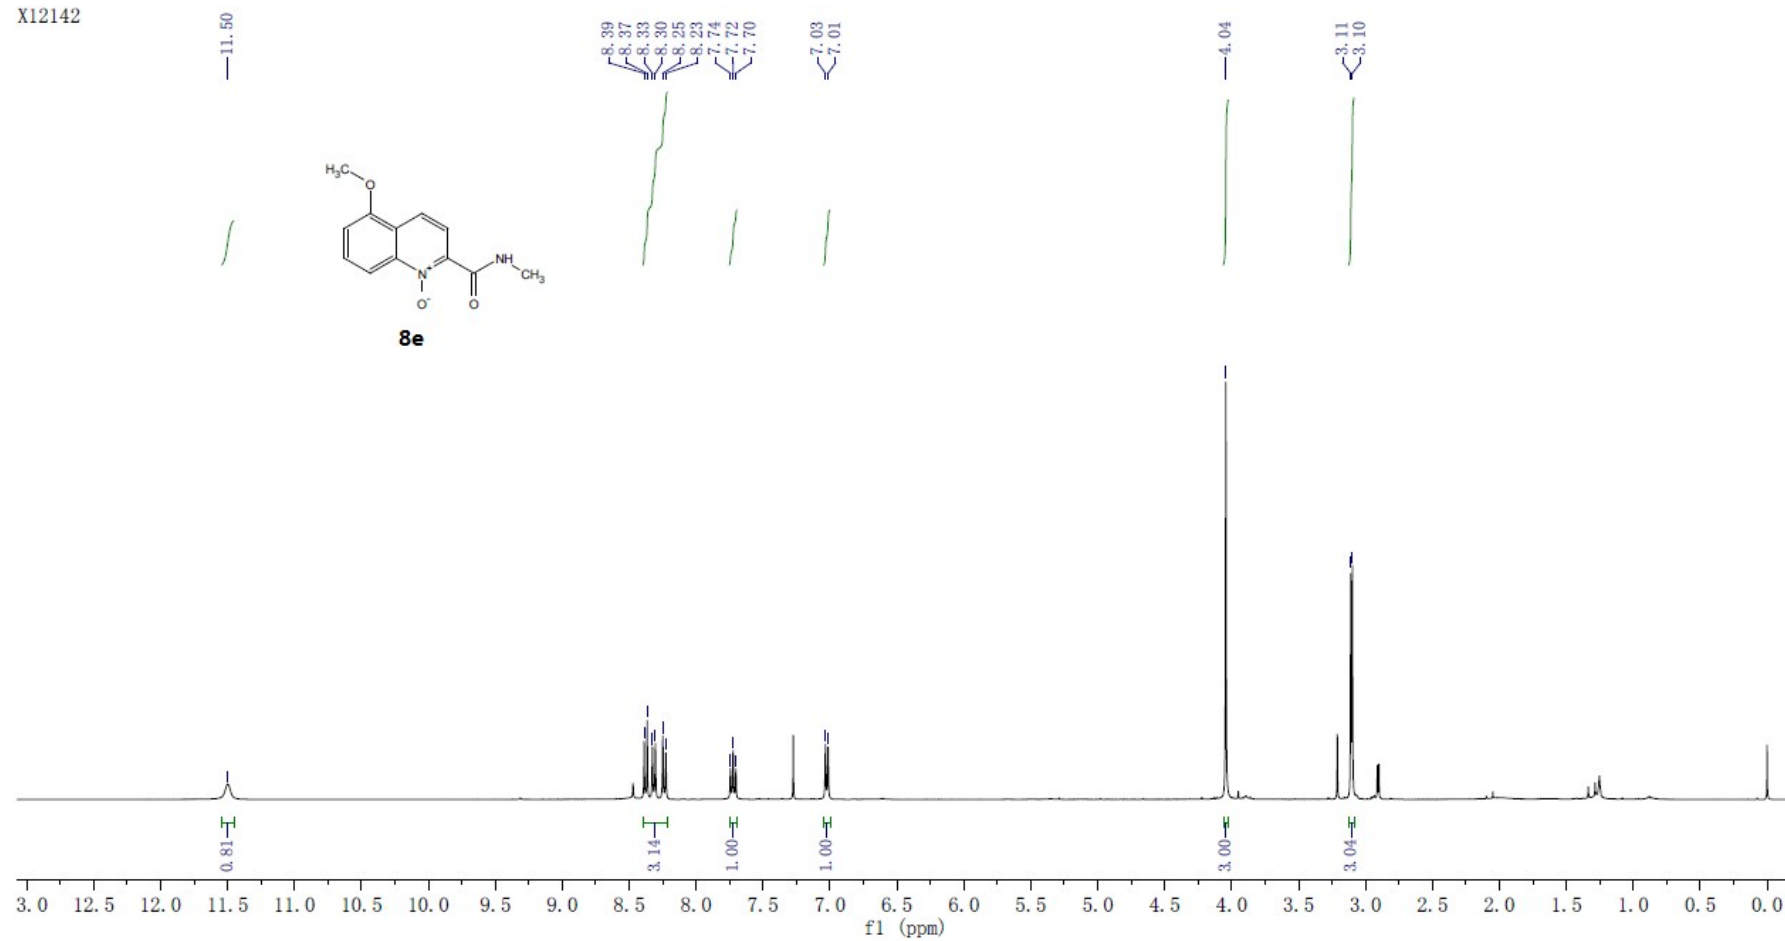

X12142

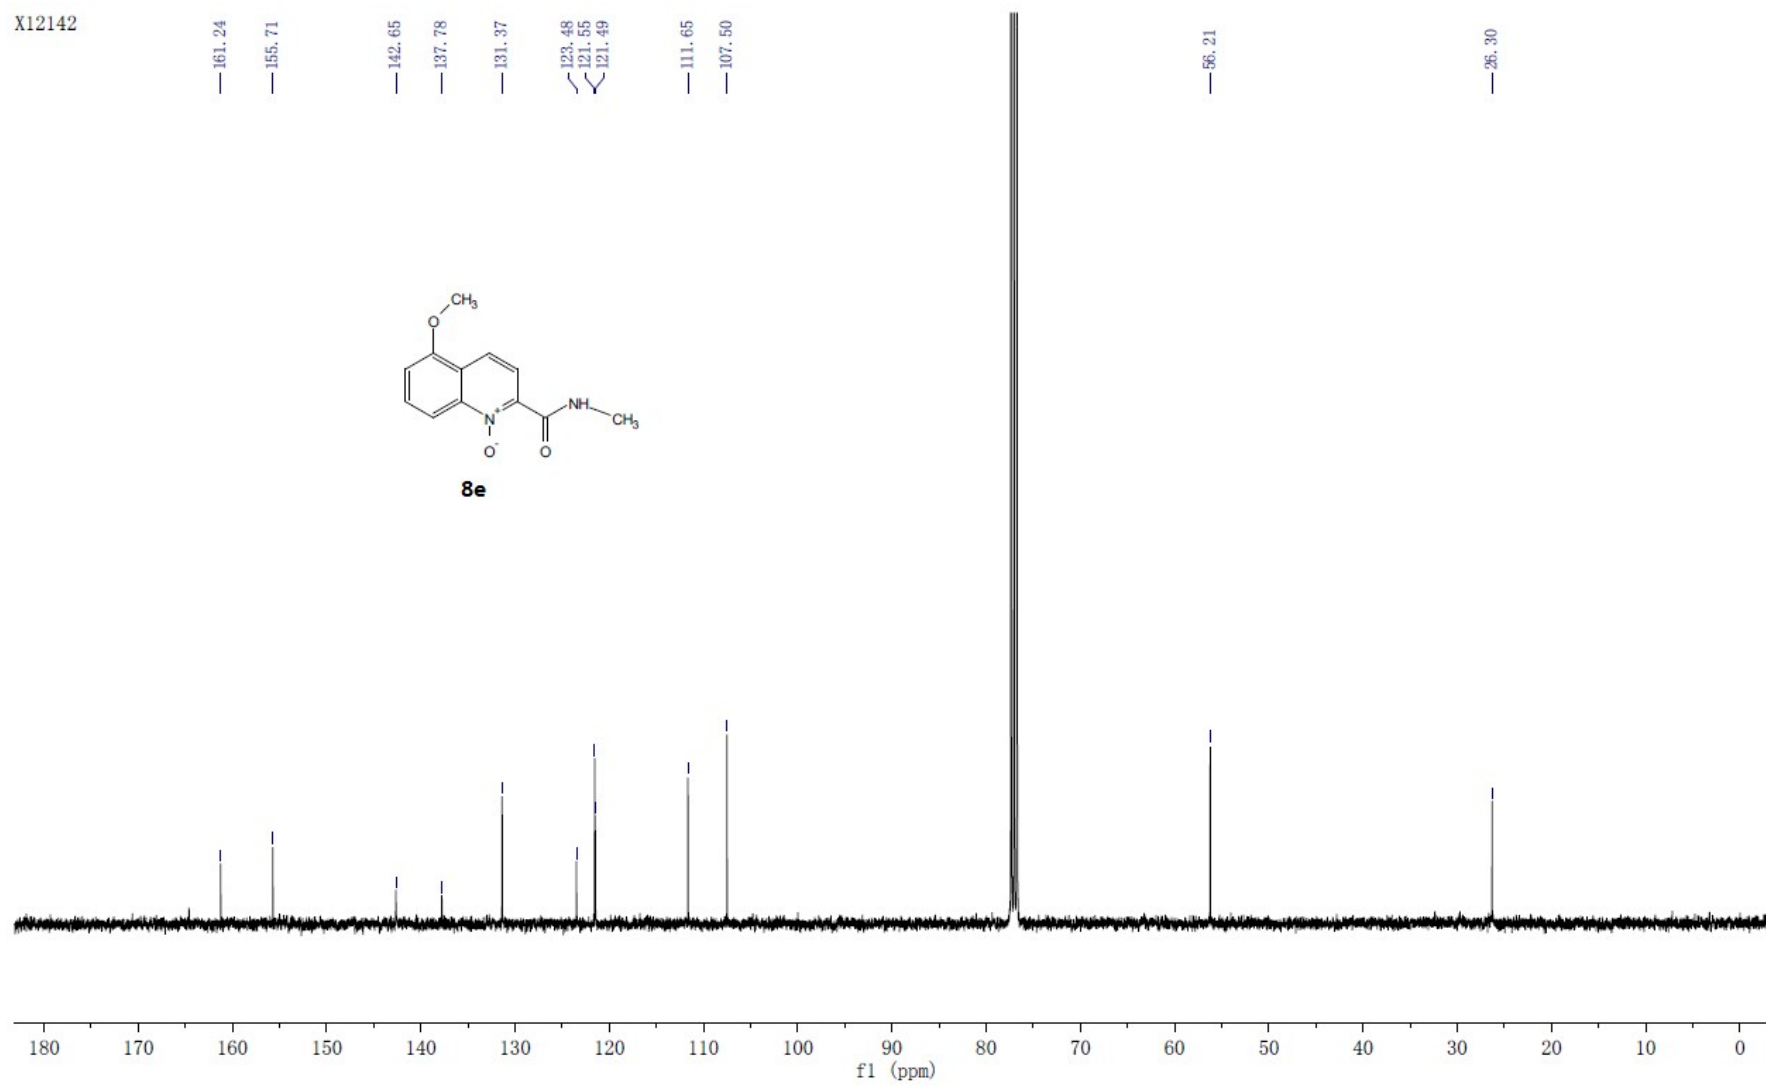

XG4-232

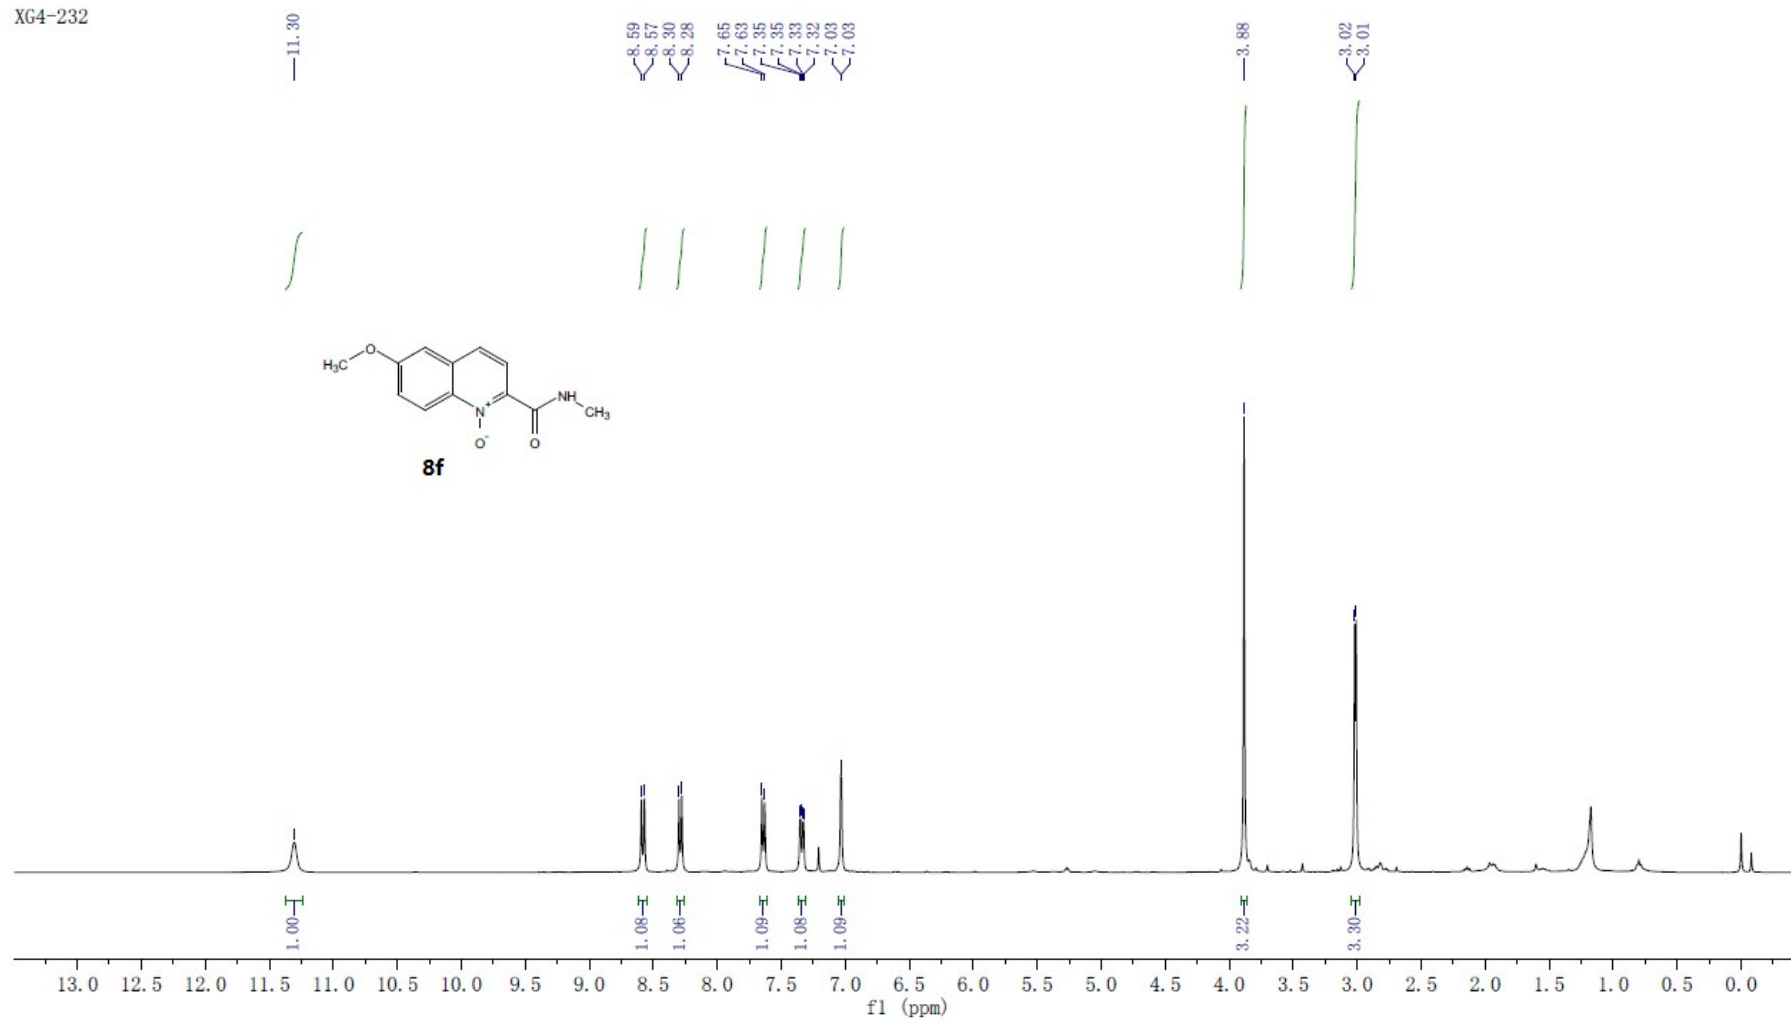

X1712c

160.30  
159.30

136.18  
134.78  
131.42

124.47  
122.48  
122.30  
120.83

104.80

54.83

25.25

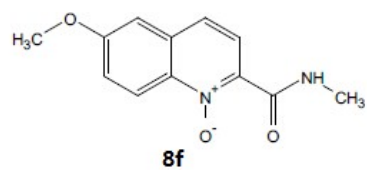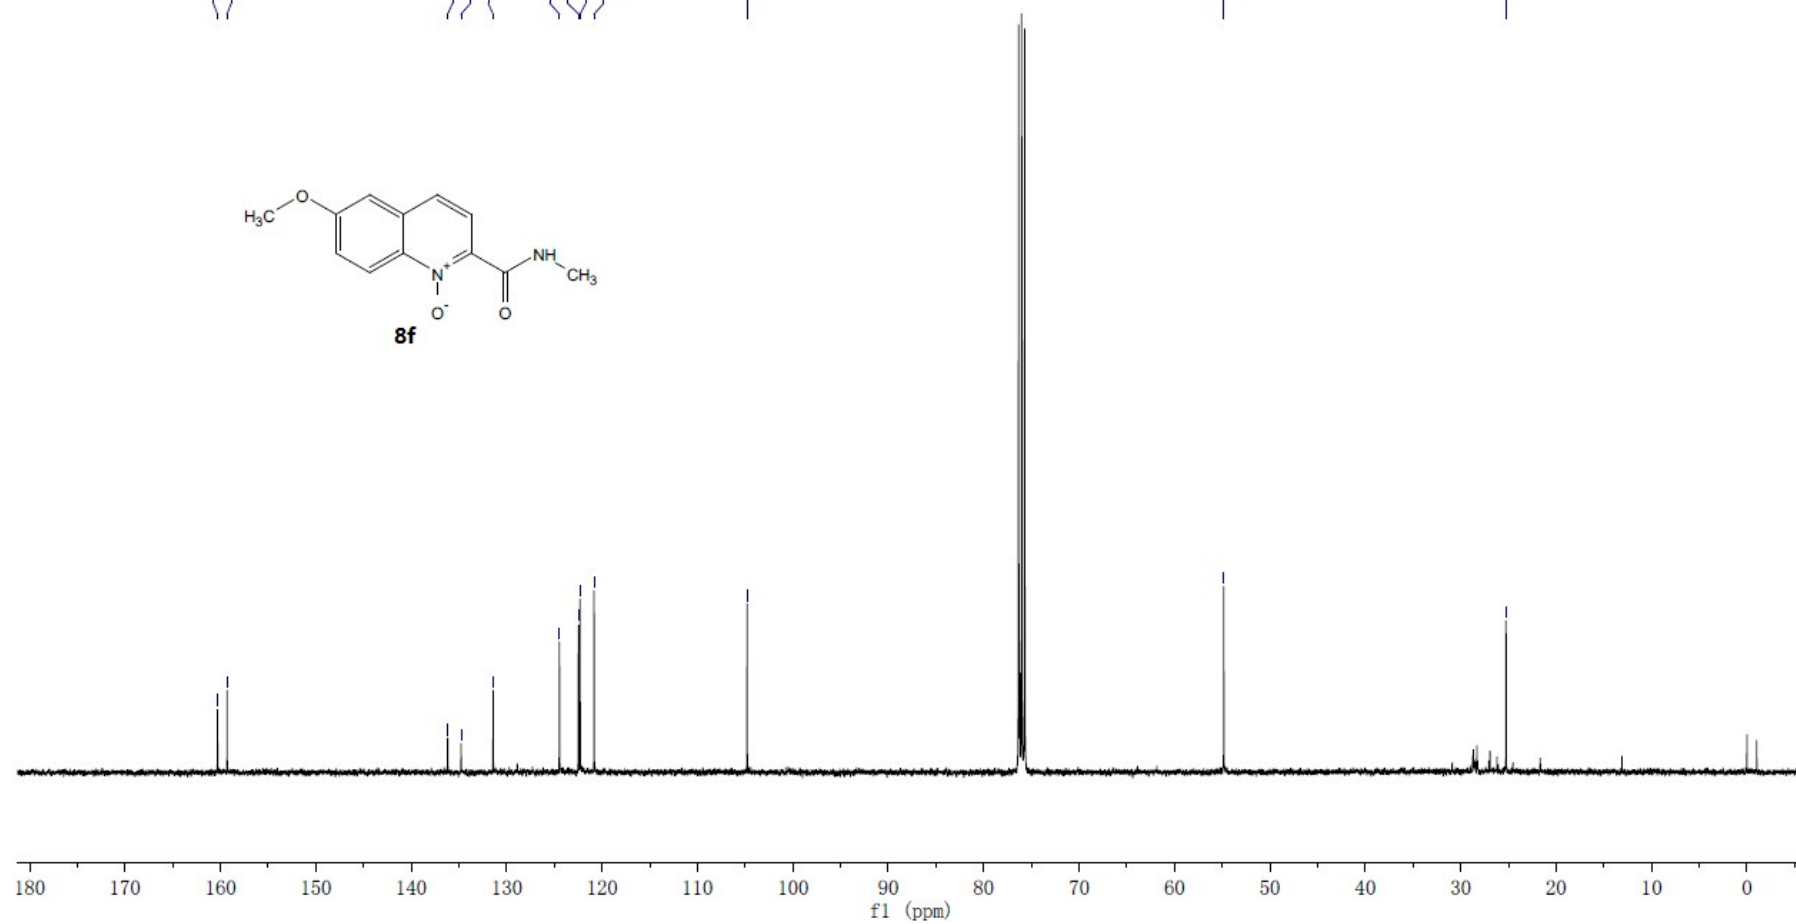

XGxa-77-20170901-HNMR  
XGxa-77-20170901-HNMR

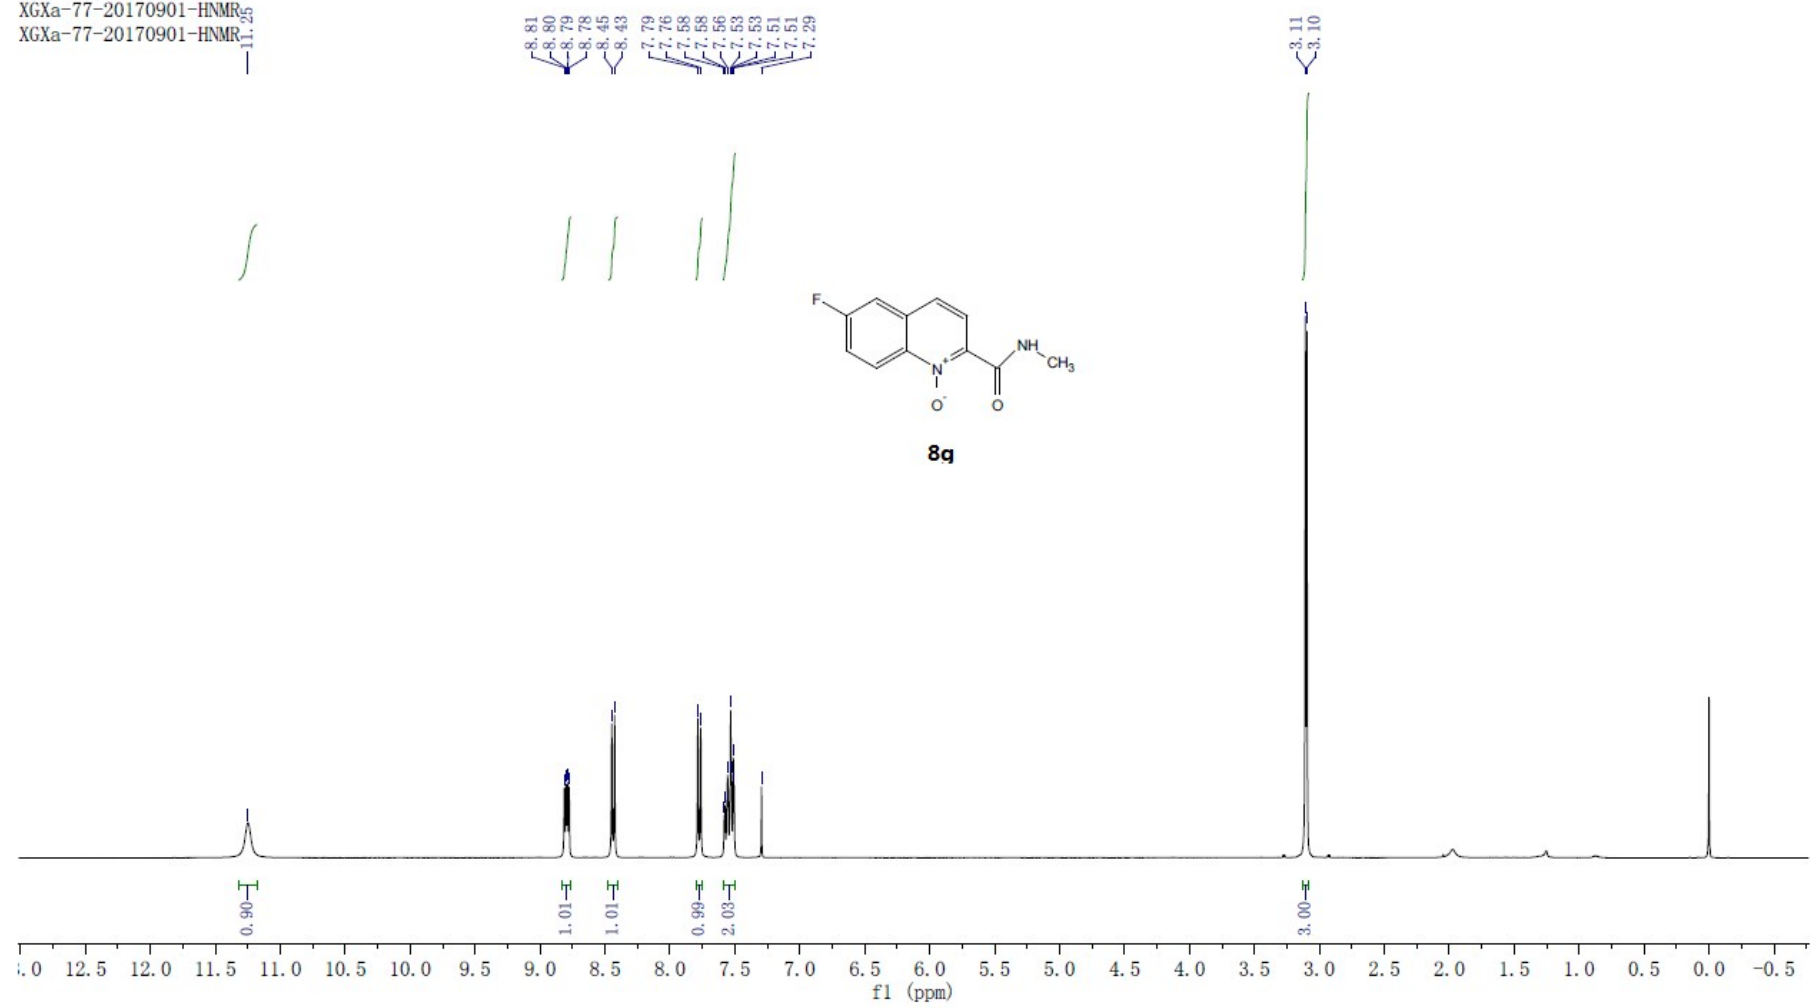



XGXa-77-20170901-CNMR  
XGXa-77-20170901-CNMR

163.79  
161.27  
160.90

138.80  
137.09  
132.13  
132.03  
125.57  
125.52  
124.02  
123.47  
123.37  
121.07  
120.81  
111.91  
111.68

26.33

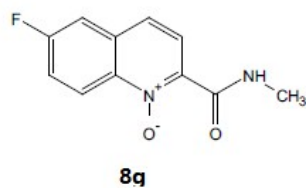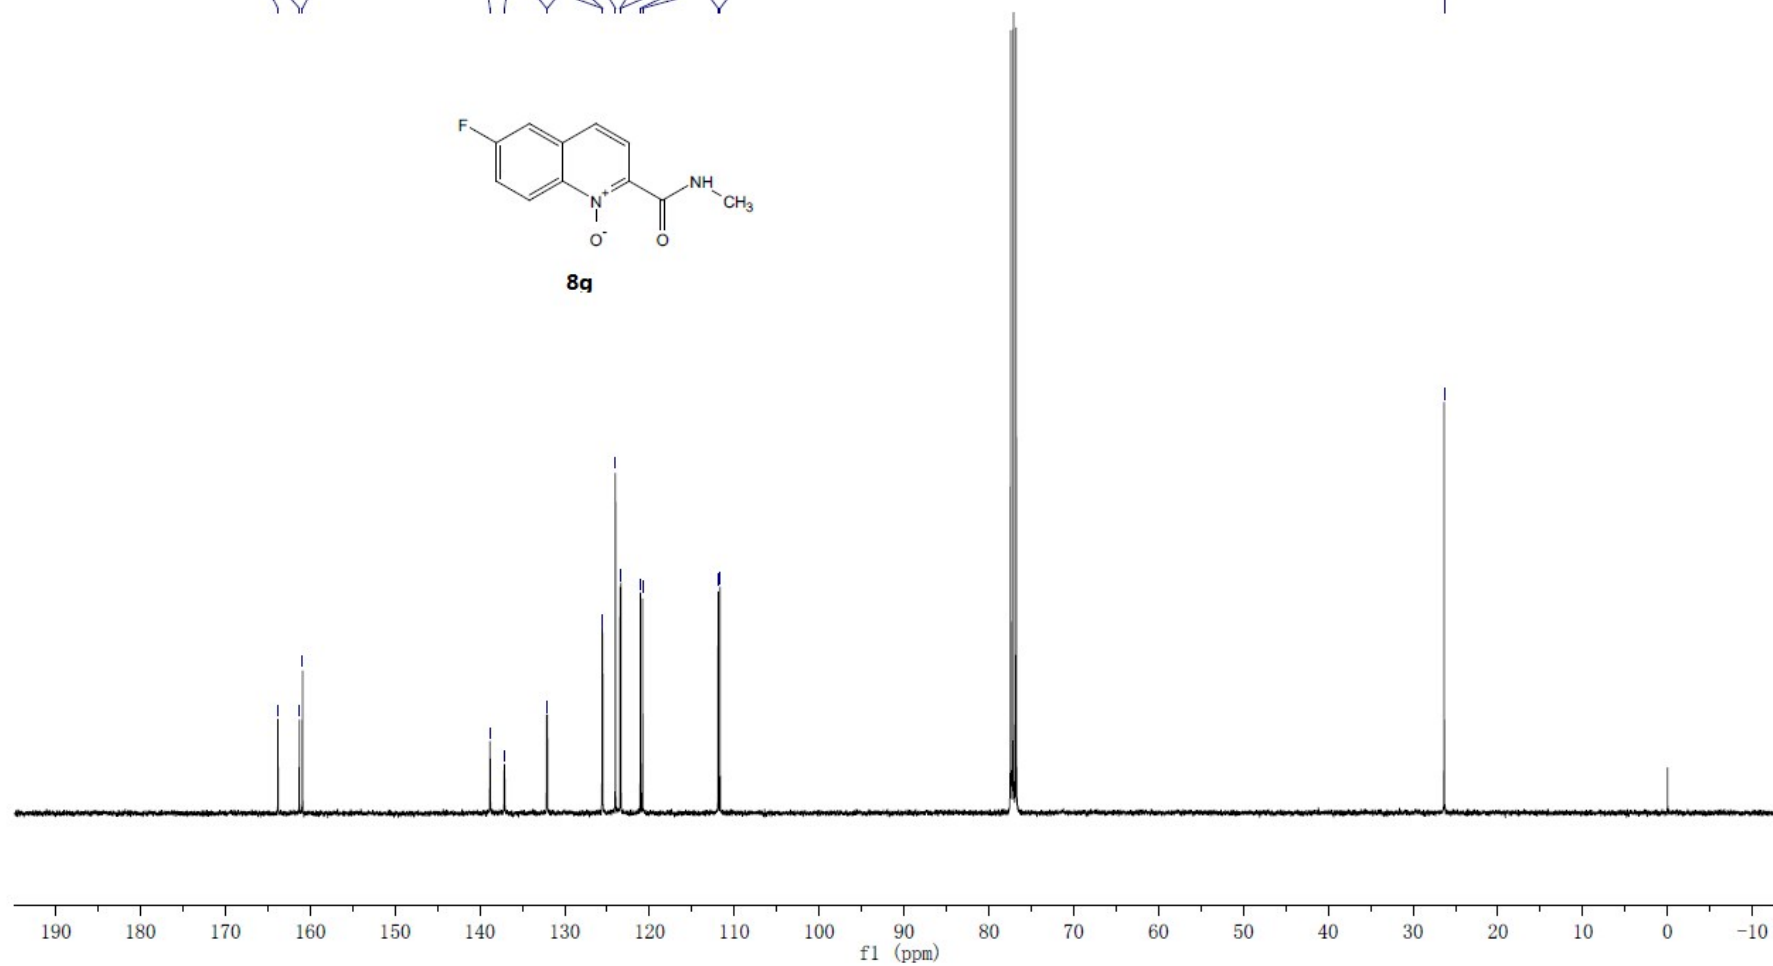

XGX1236

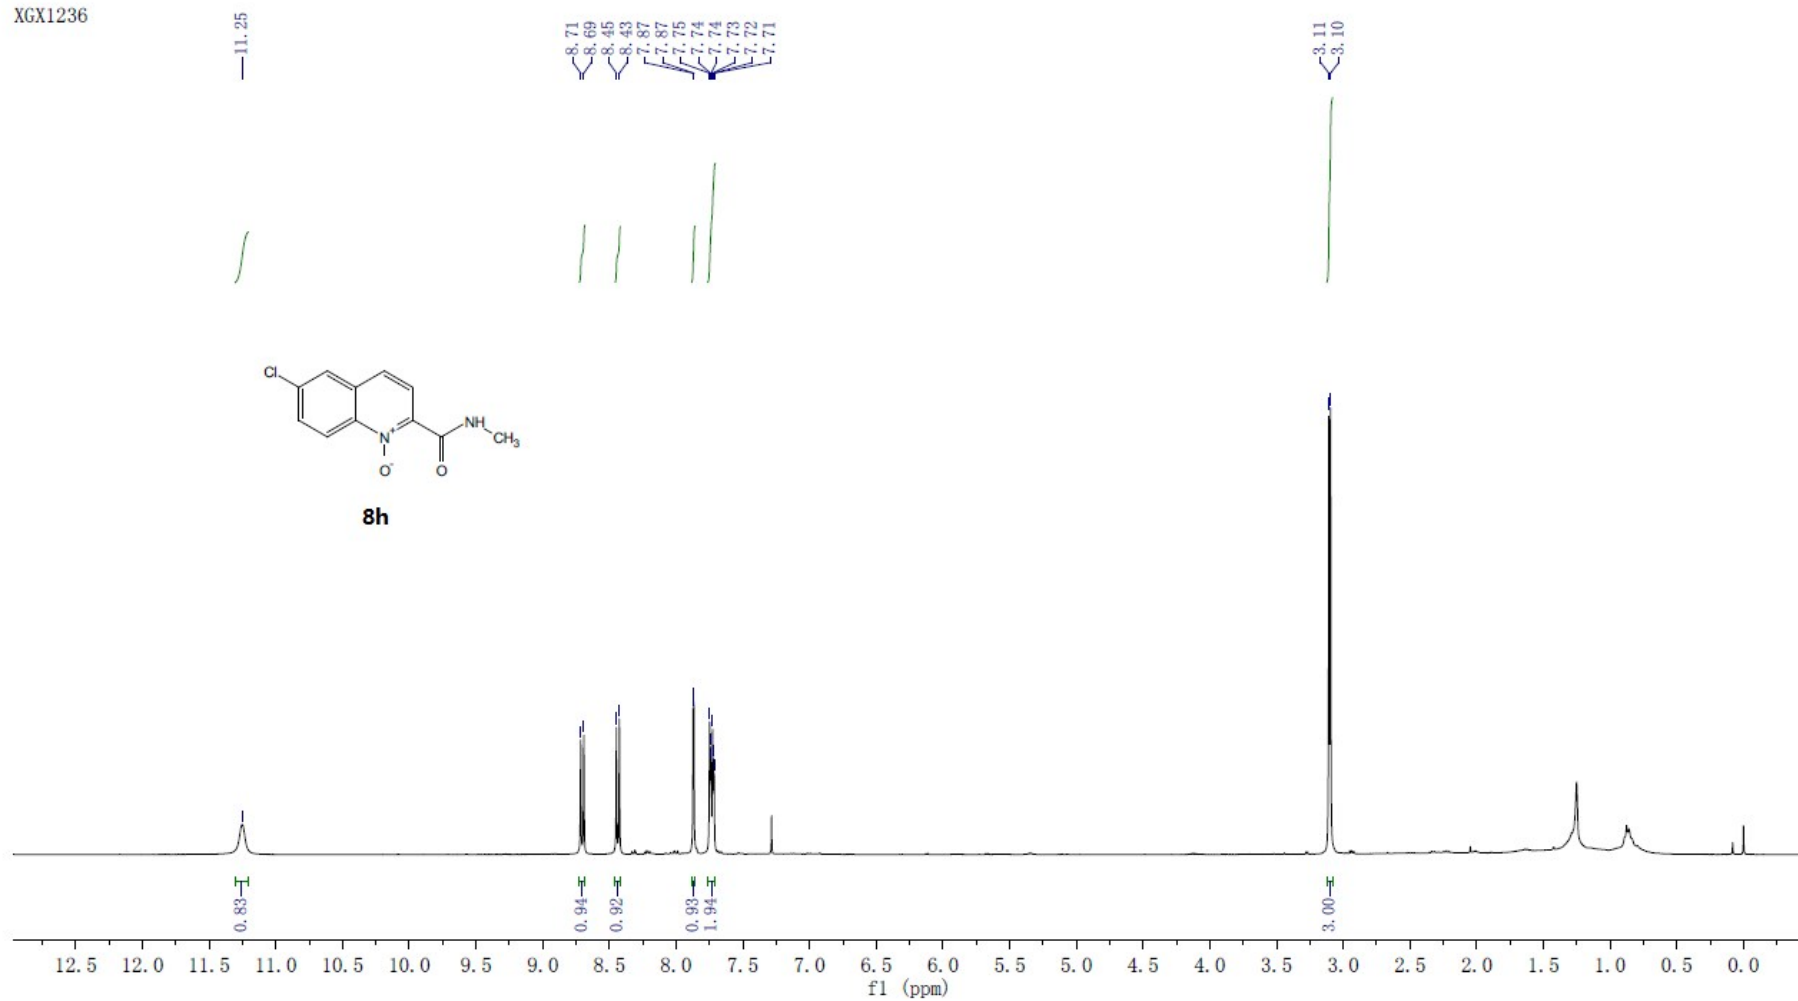

X1713d

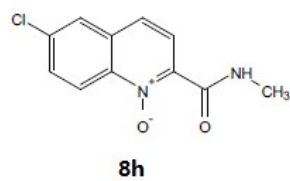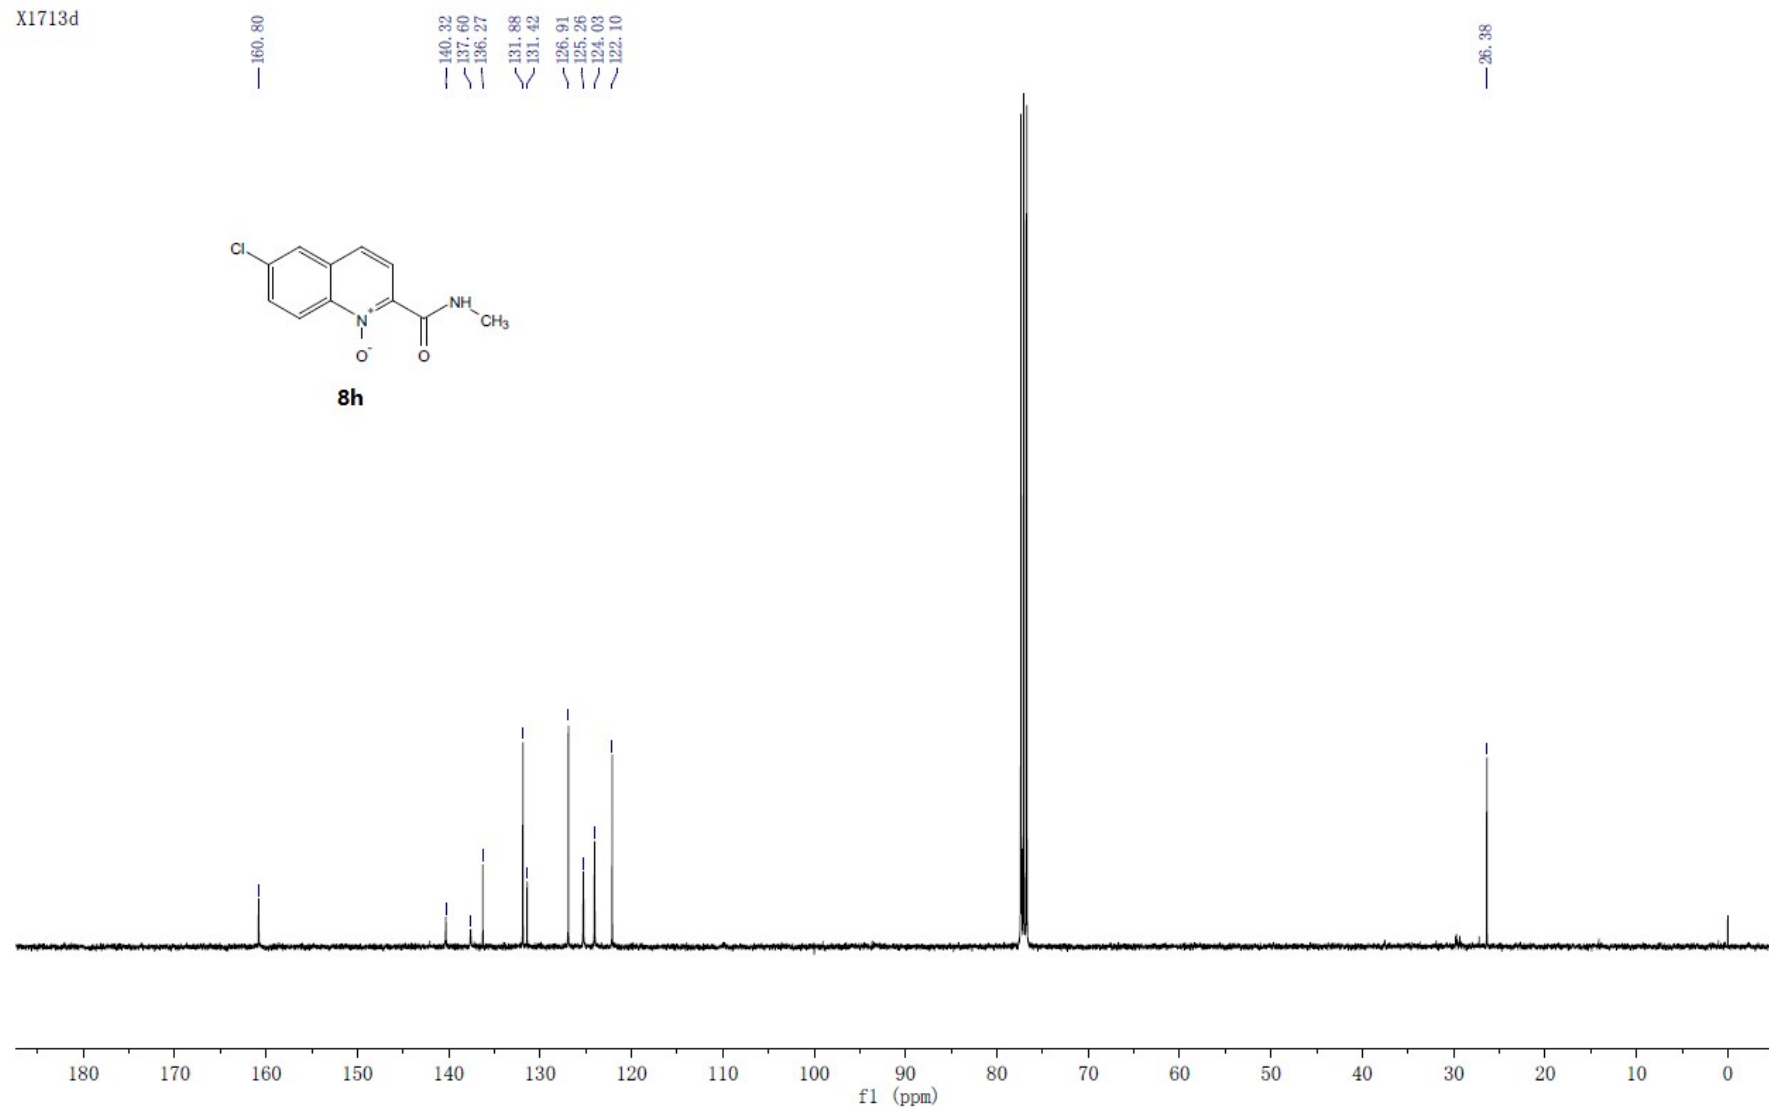

X2282

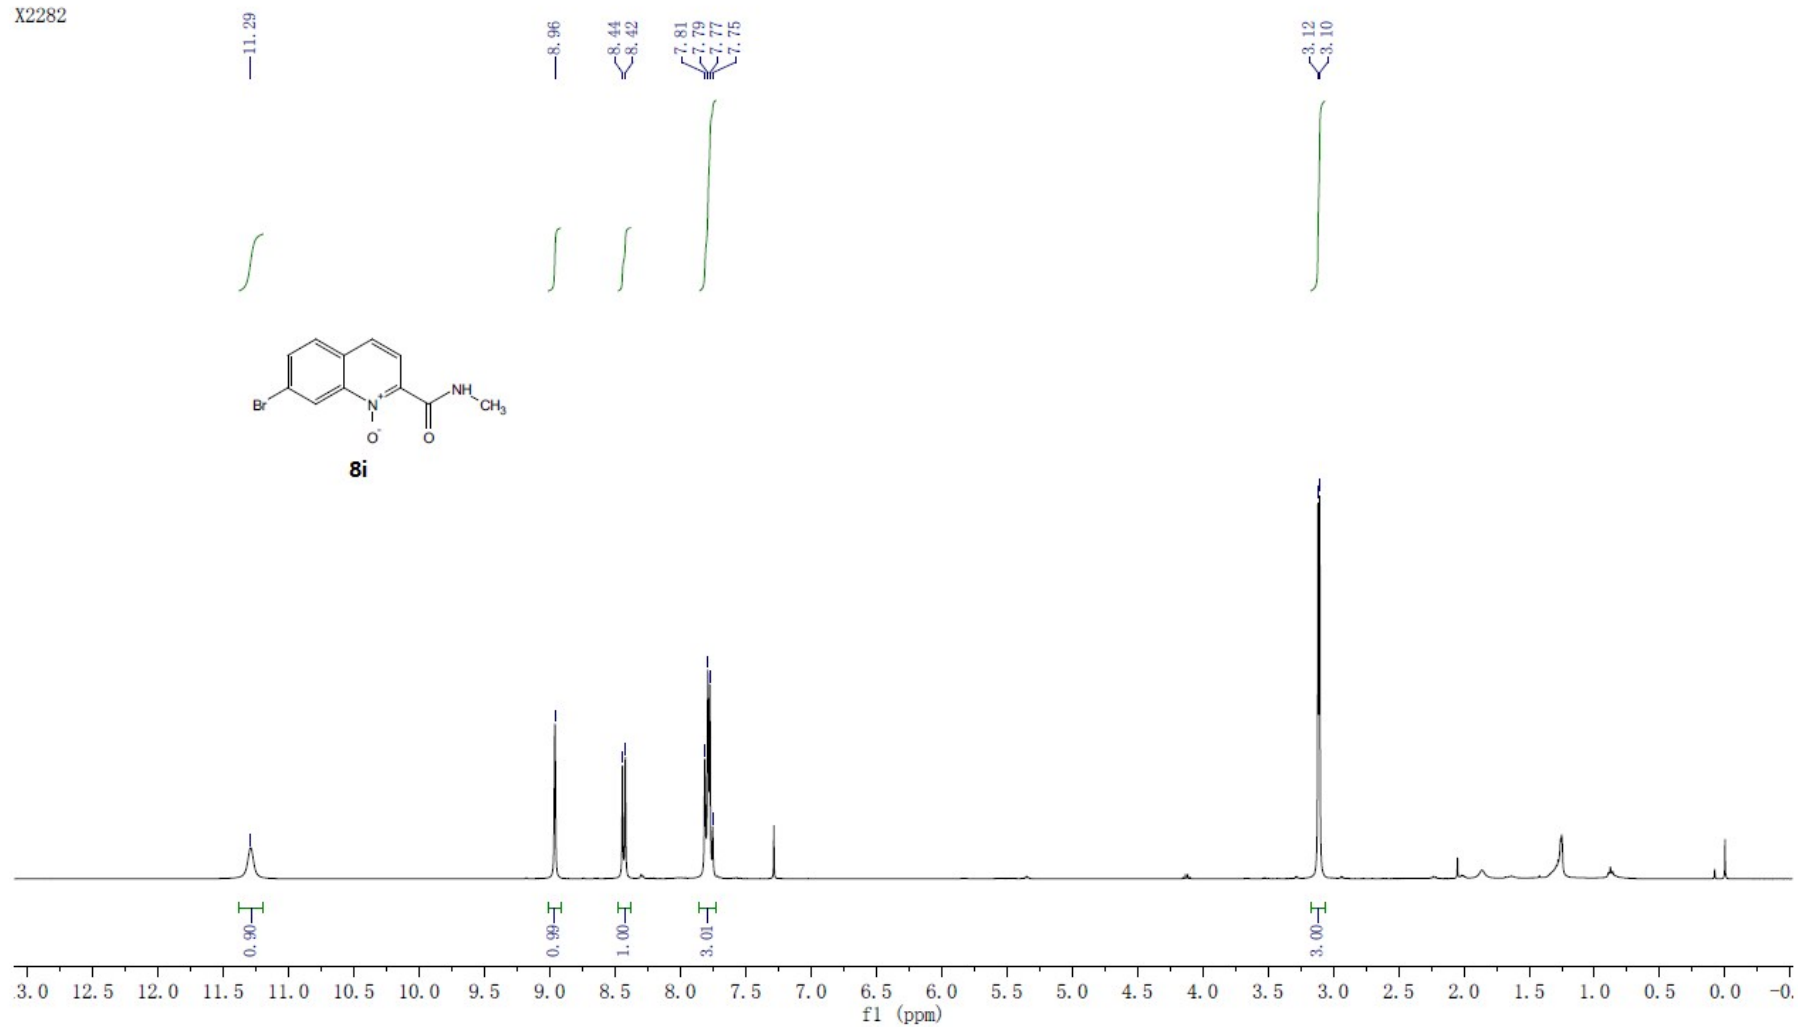

X2282

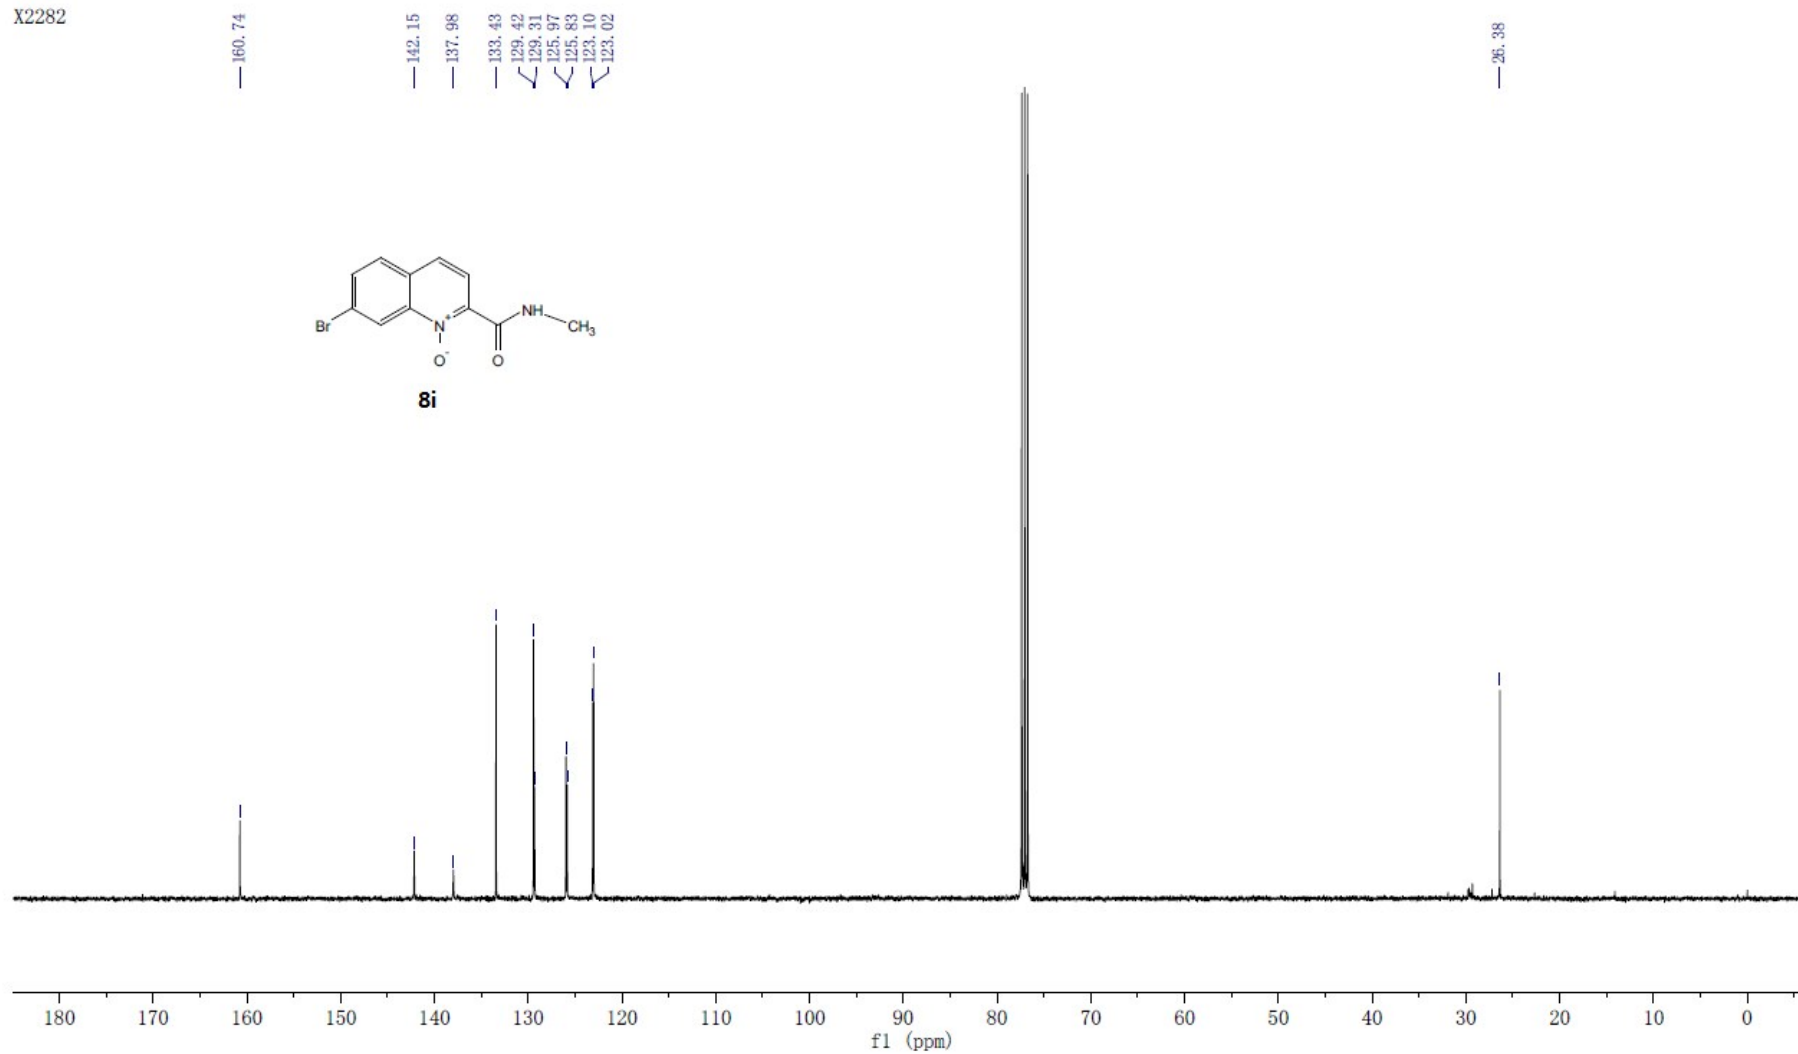

XGX-2073-20171020-HNMR  
XGX-2073-20171020-HNMR

11.33

8.83  
8.81  
8.62  
8.50  
8.48  
8.39  
8.37  
7.95  
7.93

7.28

4.03

3.12

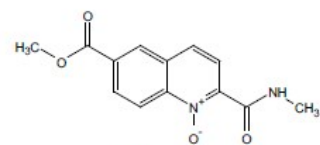

8j

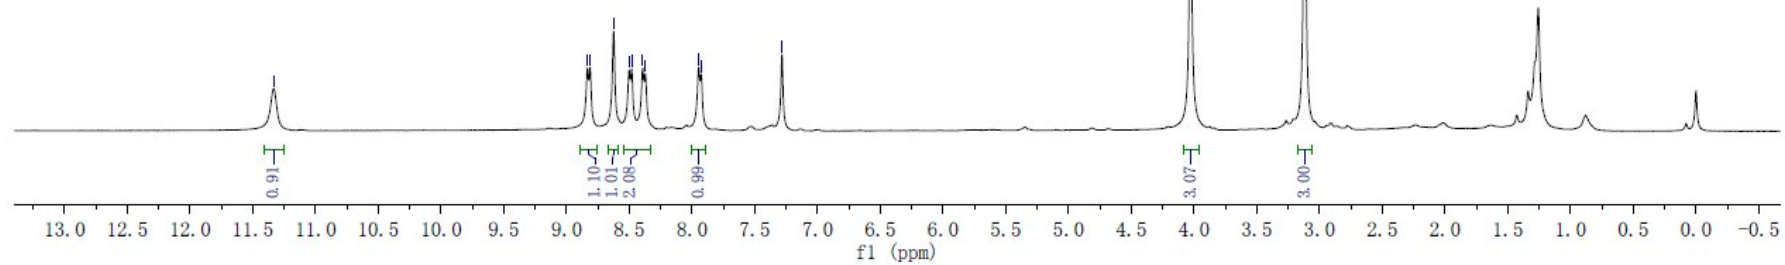

XGX-2073-20171020-CNMR  
XGX-2073-20171020-CNMR

165.51  
160.76  
143.54  
138.79  
131.33  
130.83  
130.58  
130.18  
127.03  
123.62  
120.78

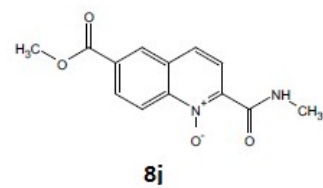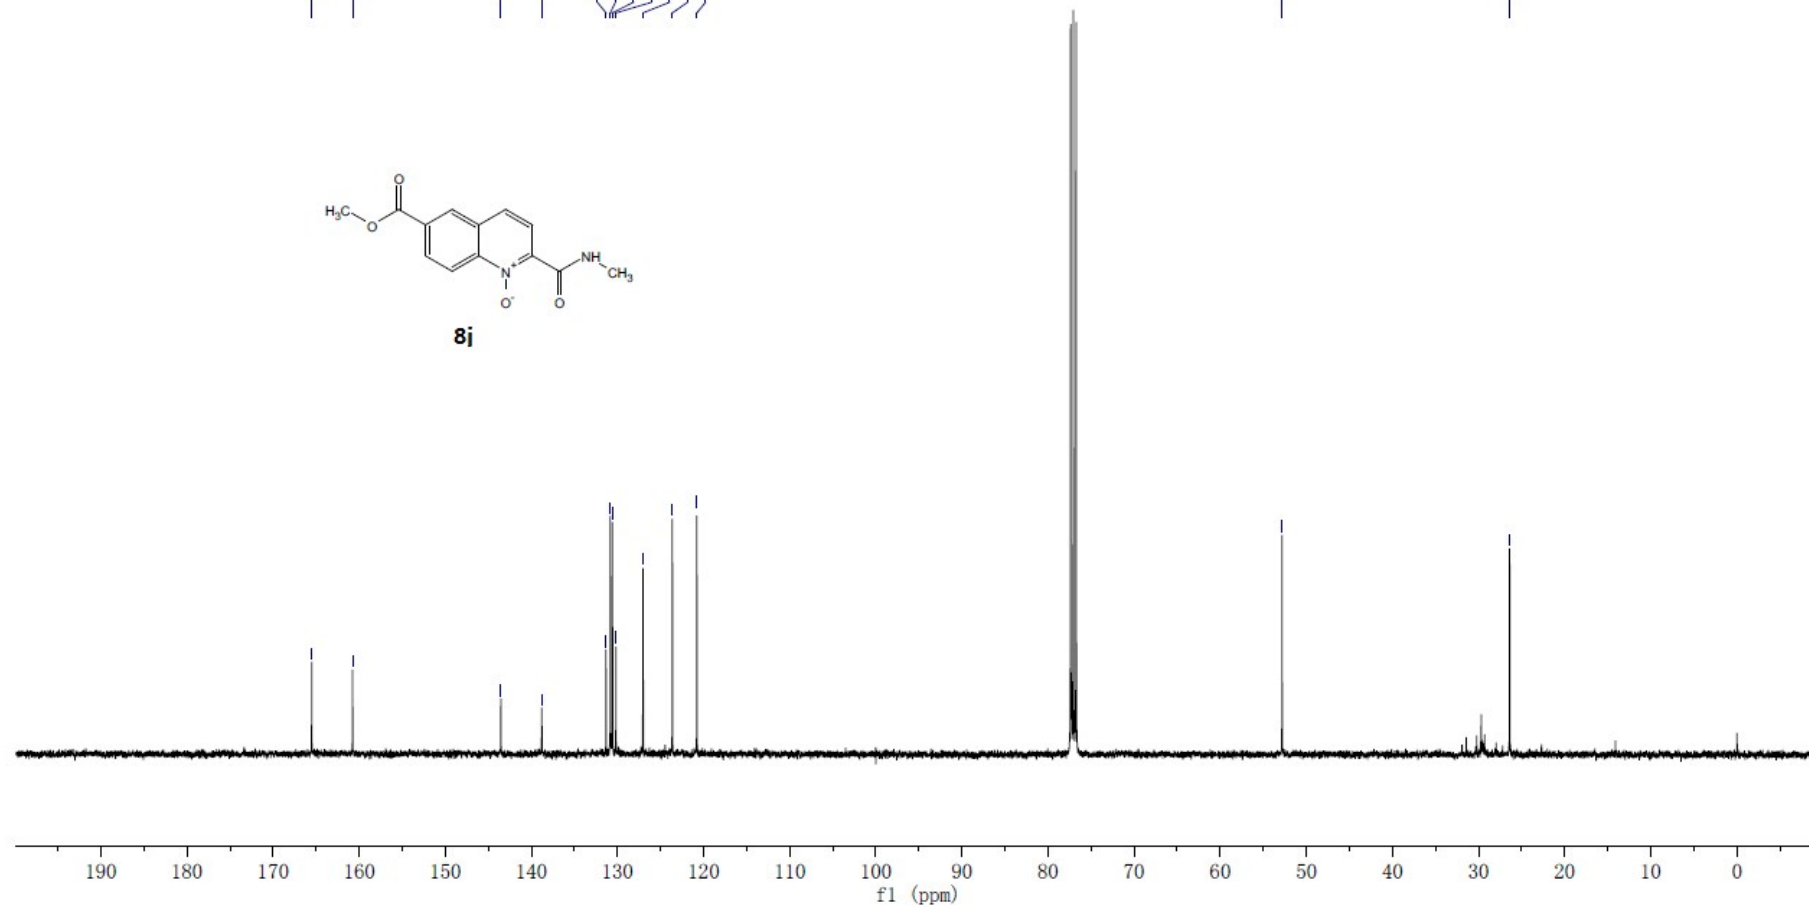

Gw-352

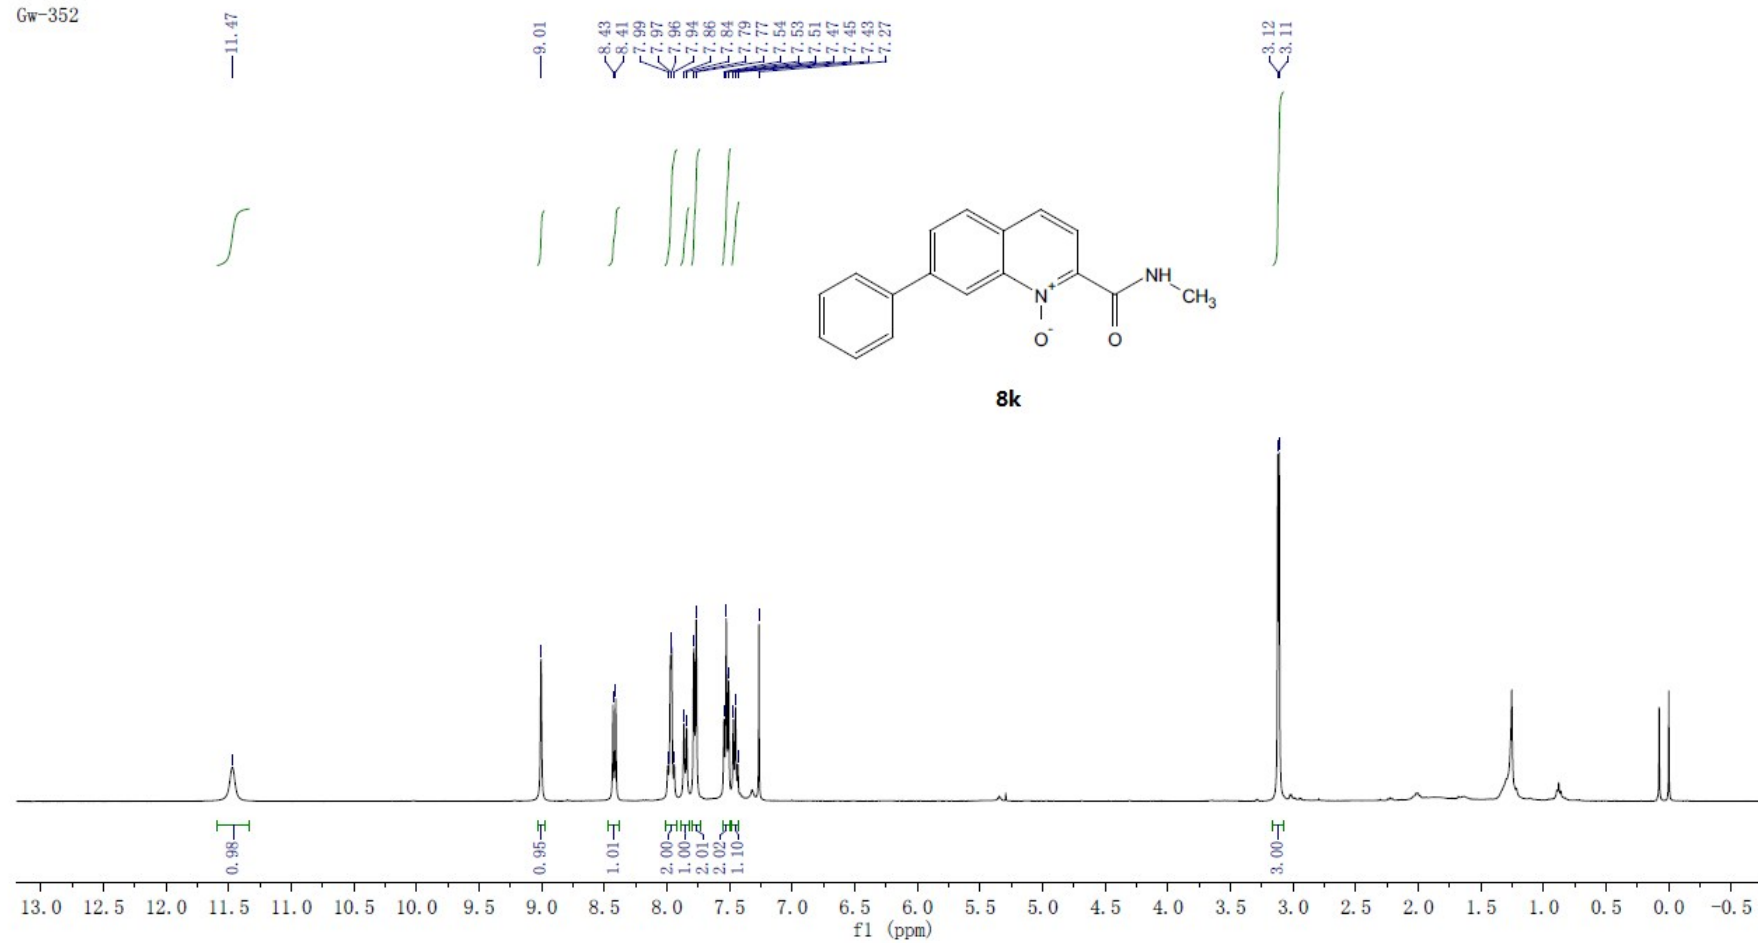



Gw-352-20170823-CNMR  
Gw-352-20170823-CNMR

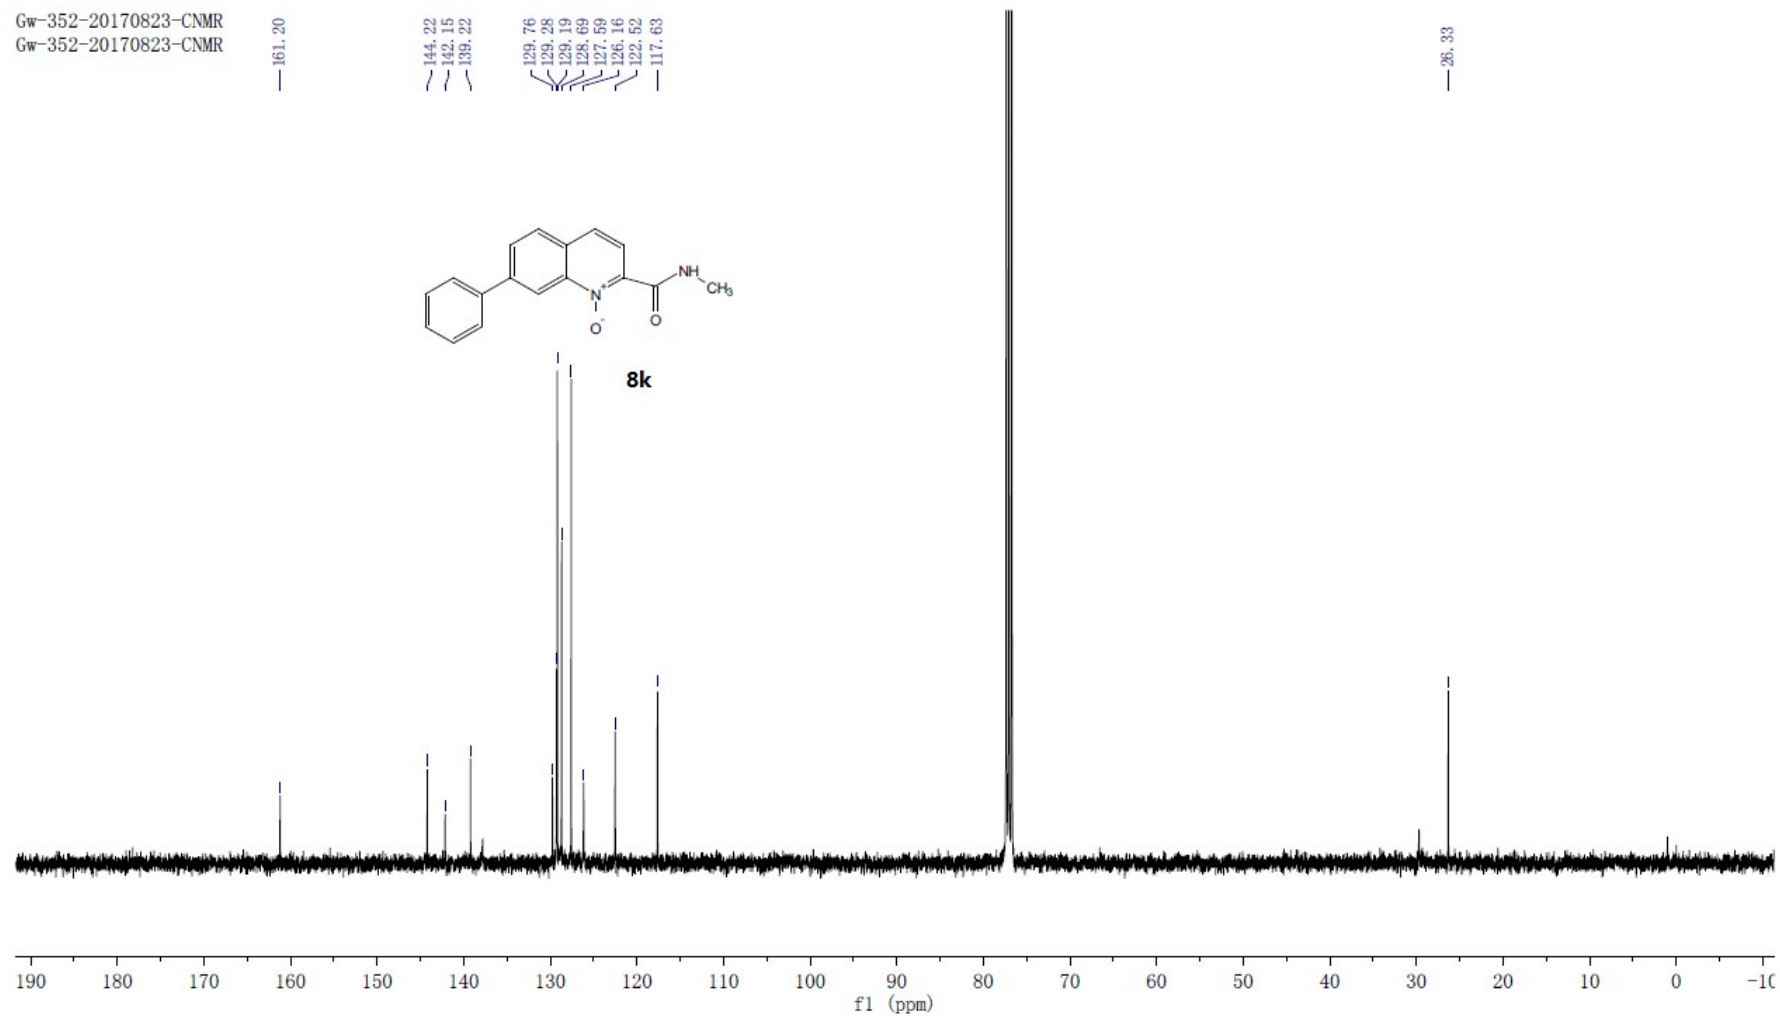

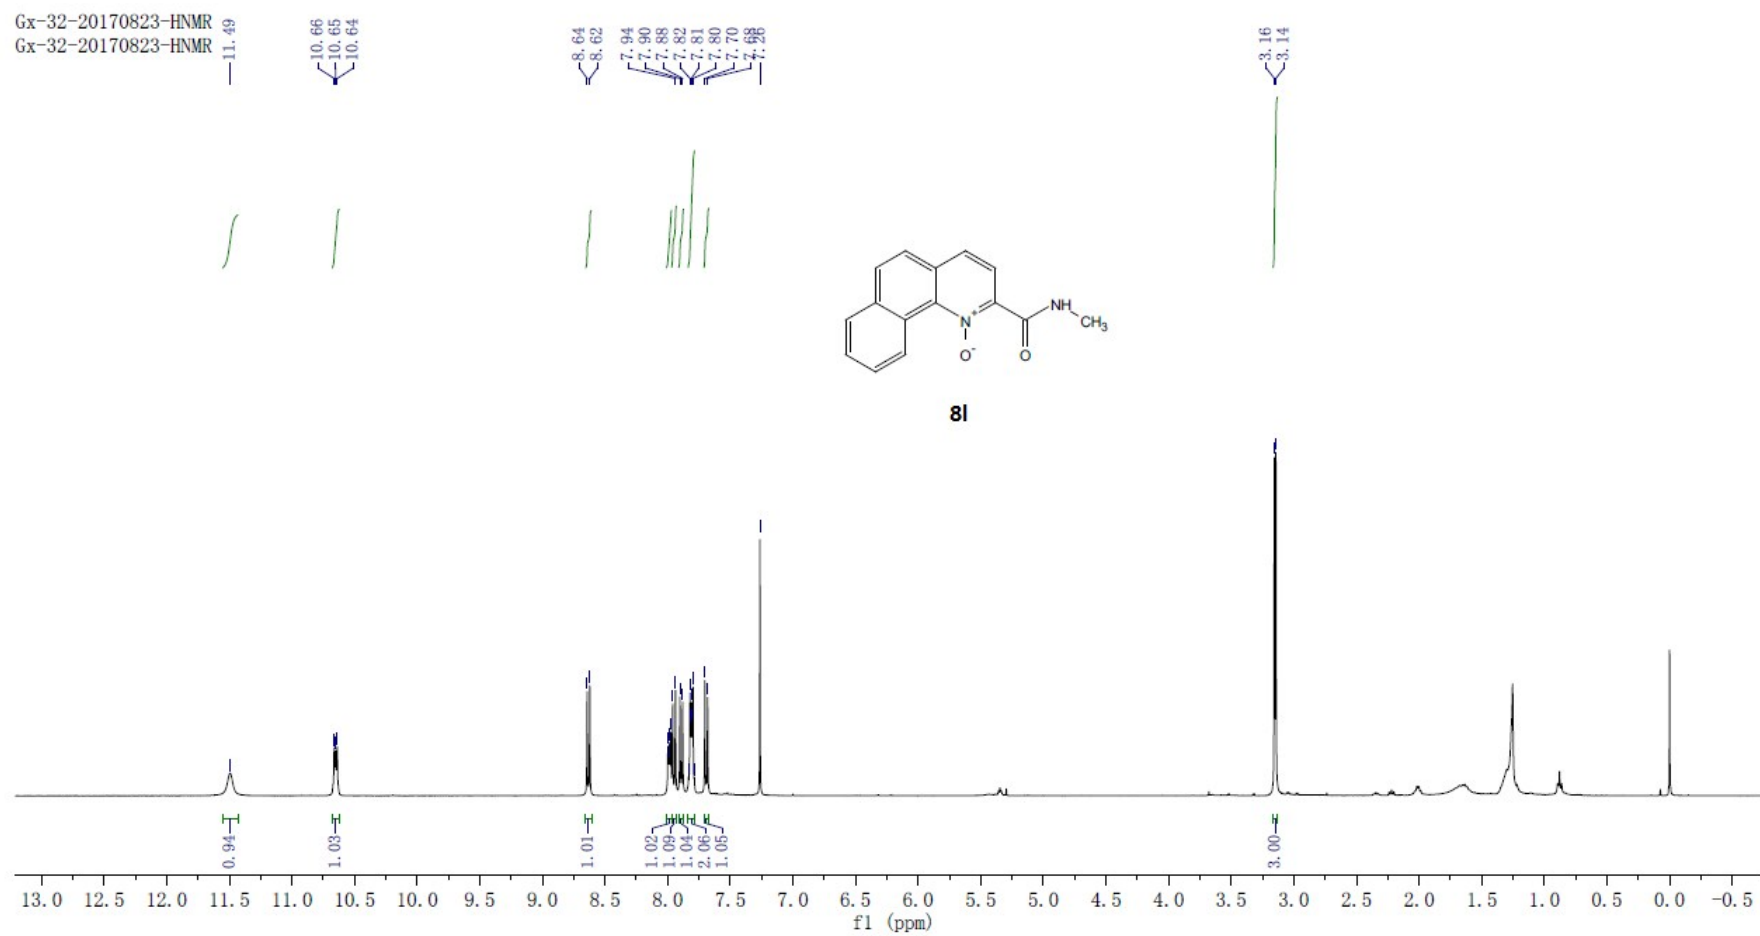

Gx-32-20170823-CNMR  
Gx-32-20170823-CNMR

161.66

134.74  
132.16  
132.00  
129.28  
128.69  
128.49  
128.21  
126.27  
126.23  
124.90  
124.20

26.42

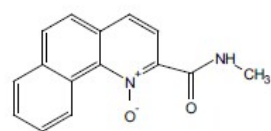

**8l**

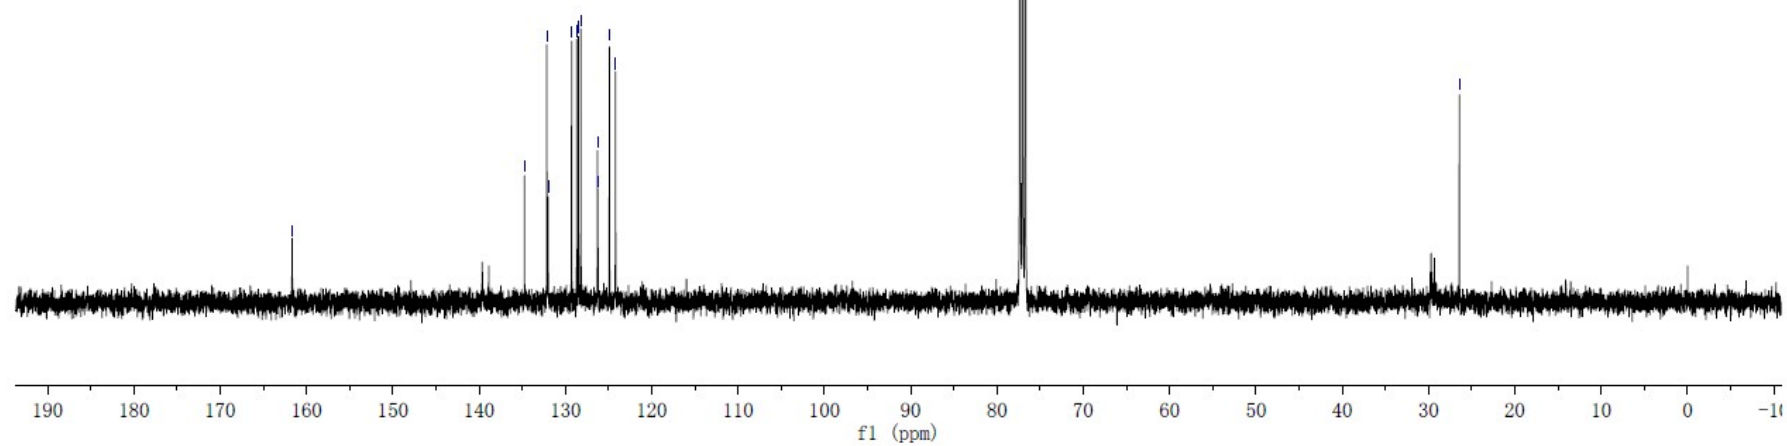

XGX-3058

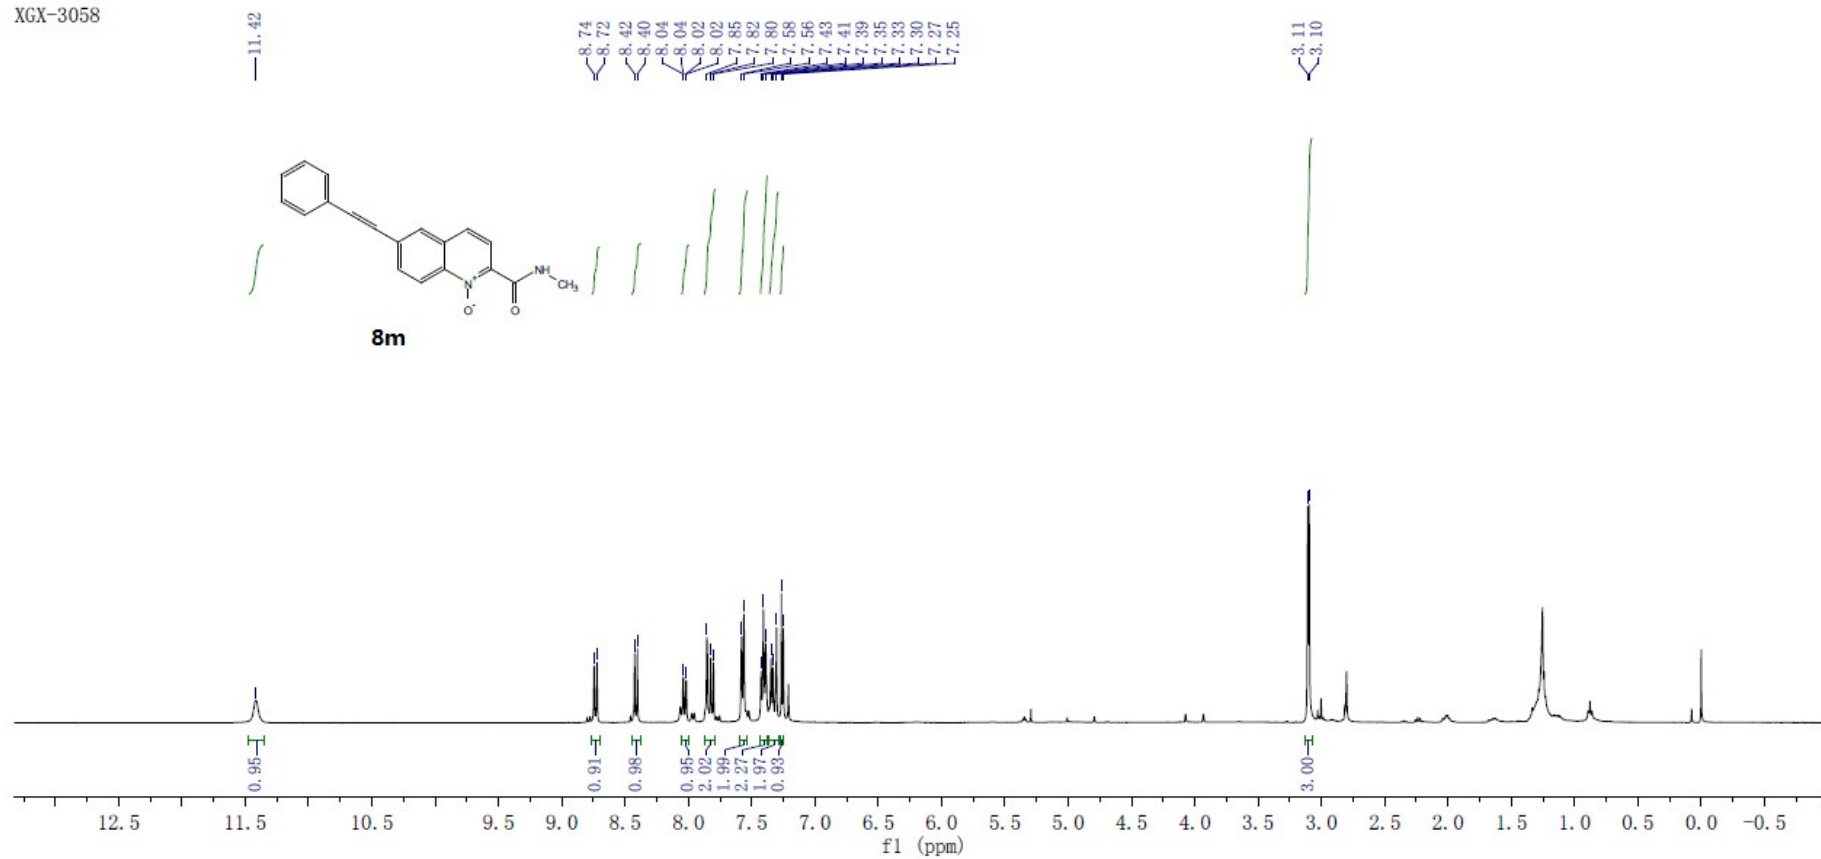

XGX-3058-20170912-CNMR  
XGX-3058-20170912-CNMR

141.02  
139.01  
136.38  
132.58  
131.27  
129.01  
128.90  
128.66  
126.93  
126.40  
125.59  
123.20  
120.53

26.33

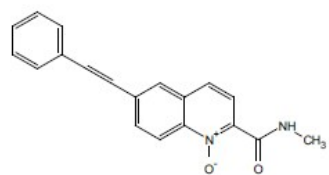

8m

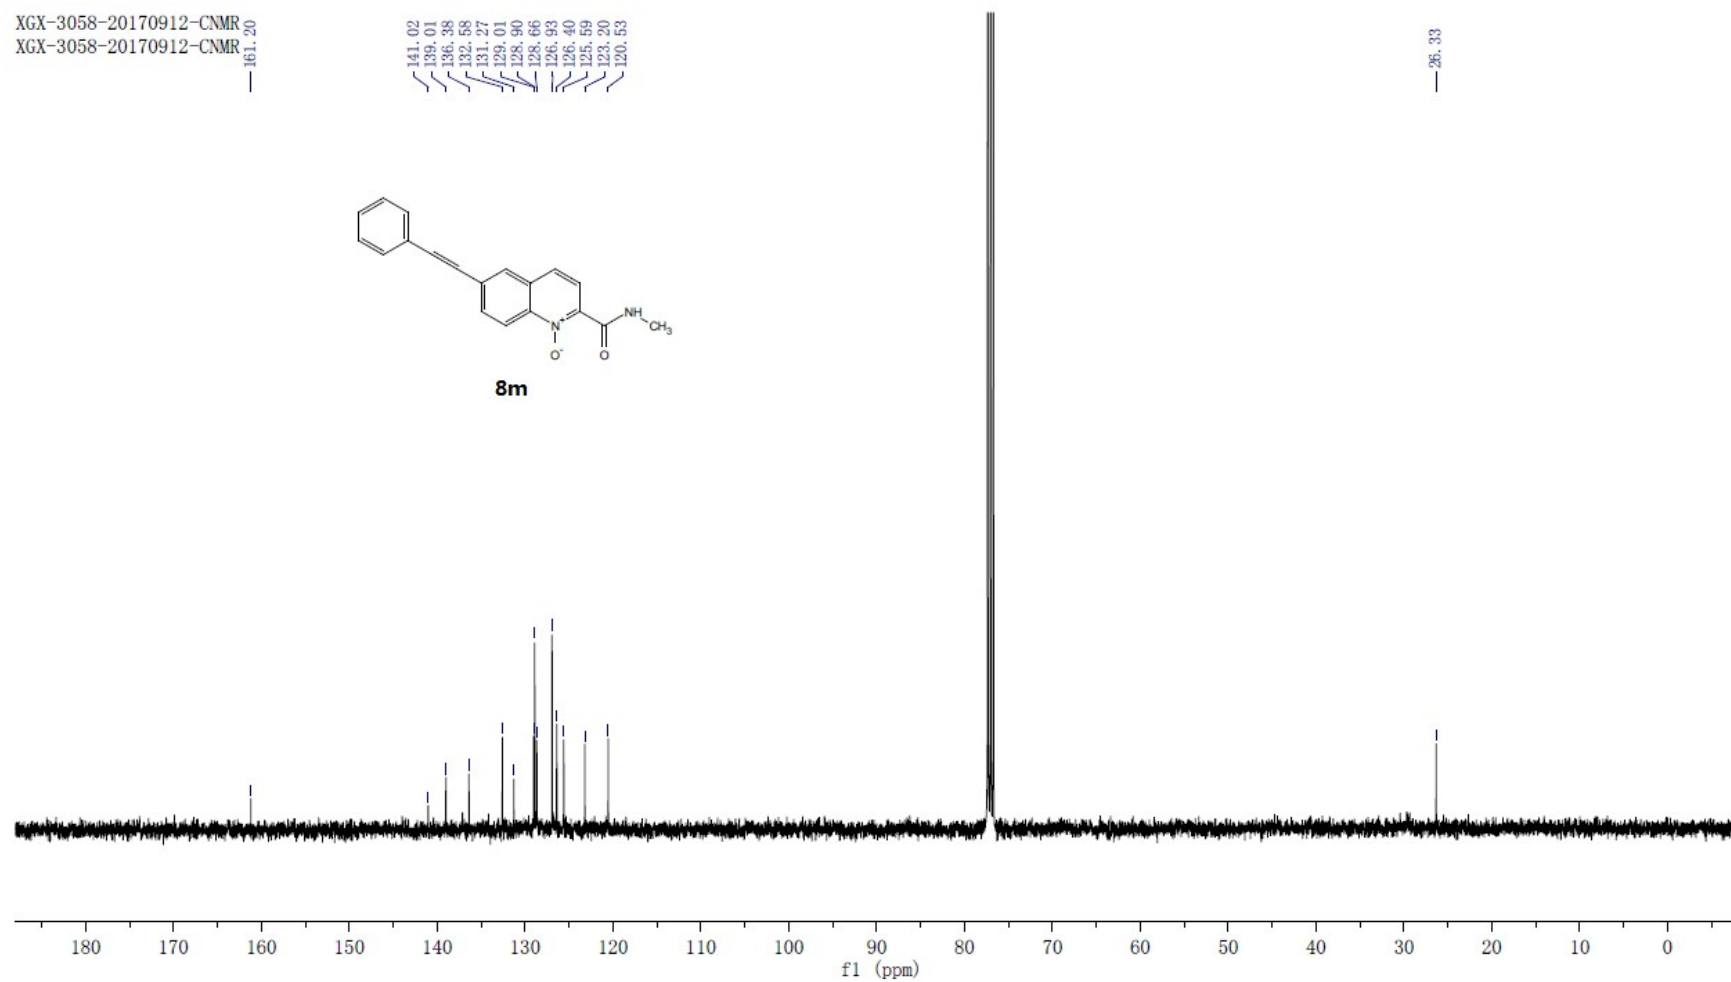

XGXb-298-20170914-HNMR  
XGXb-298-20170914-HNMR

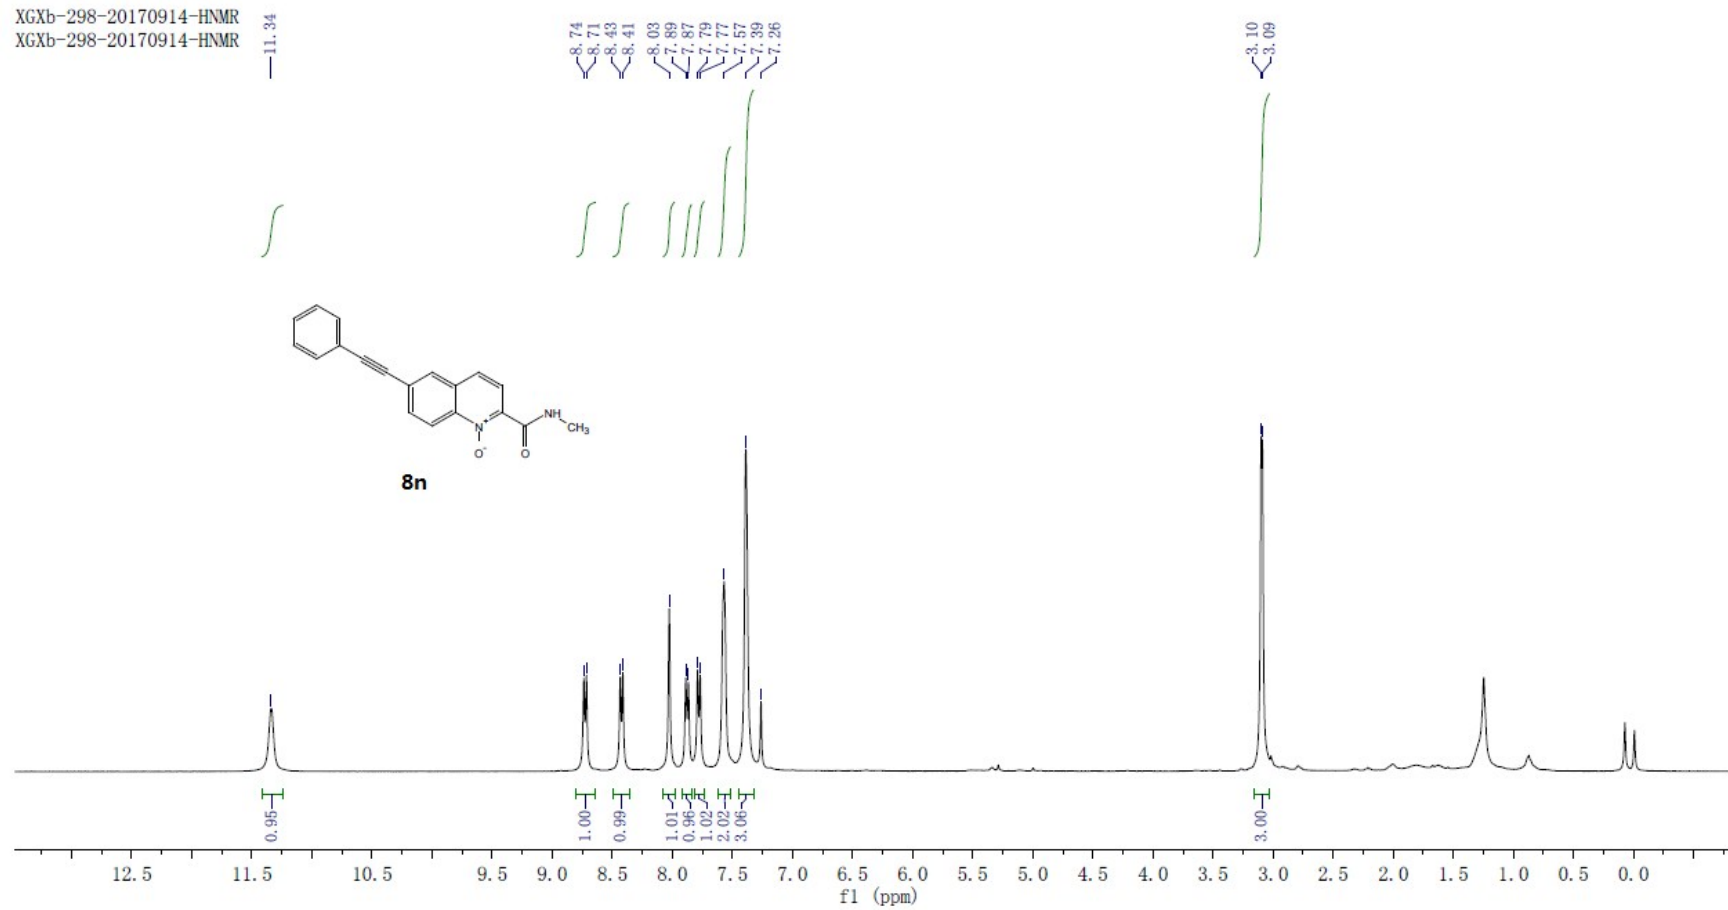

XGxb-298-20170914-CNMR  
XGxb-298-20170914-CNMR

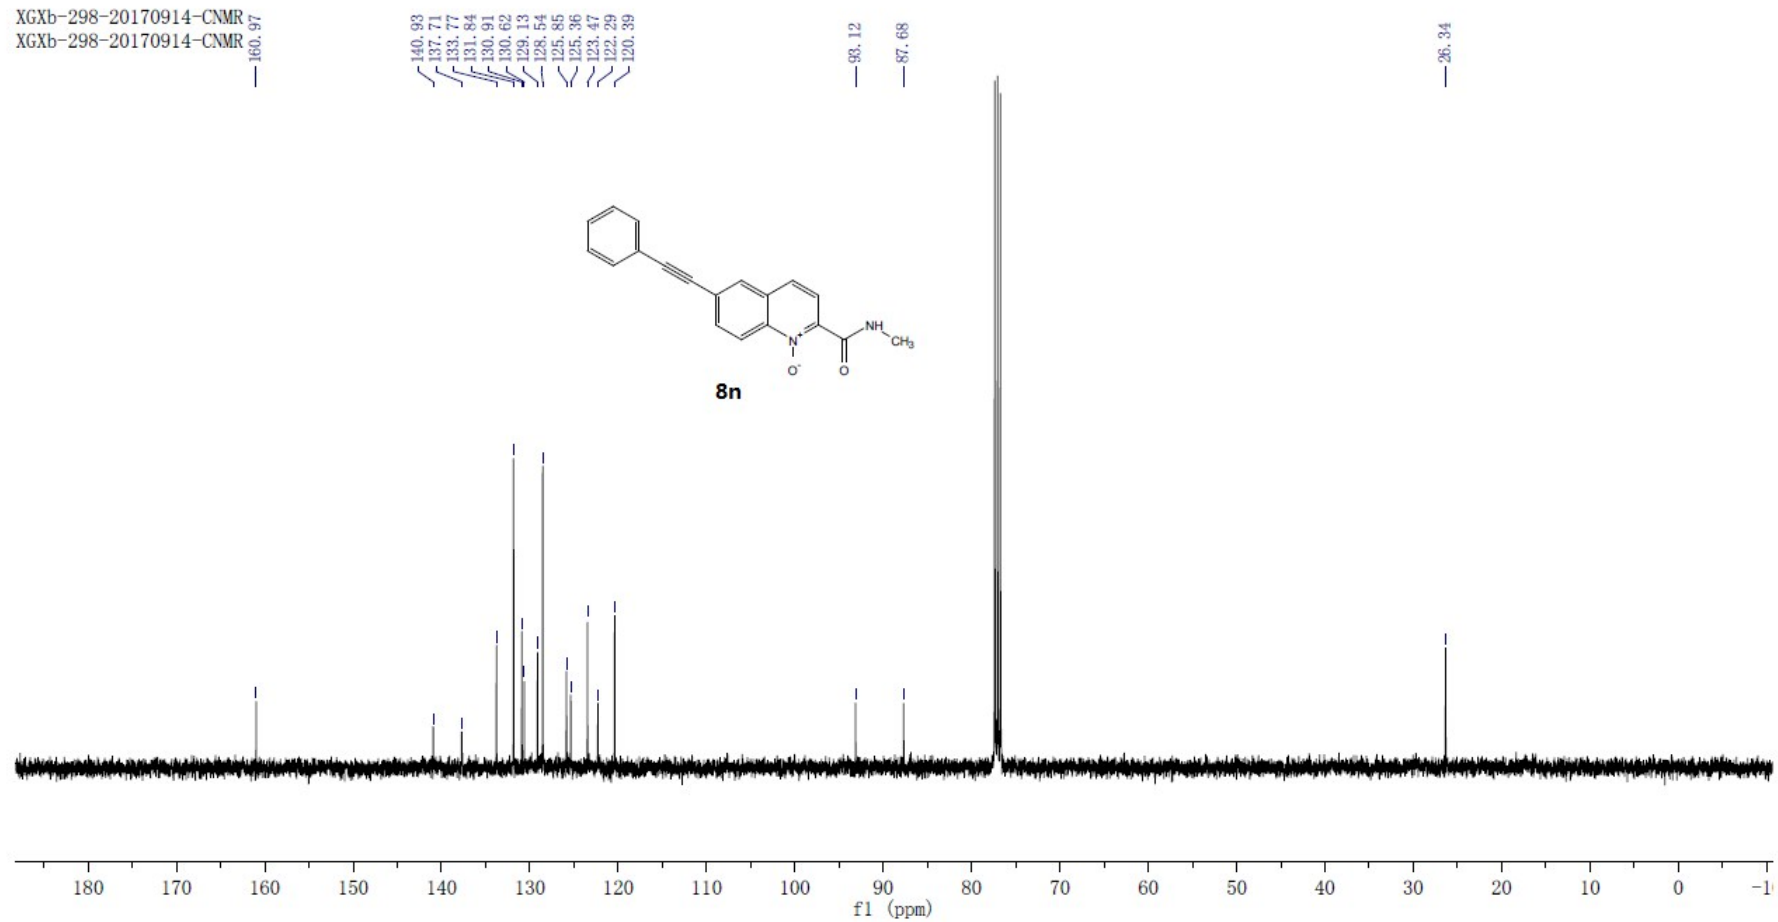

—11.49

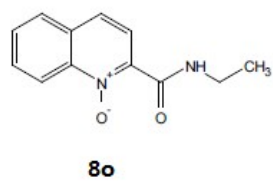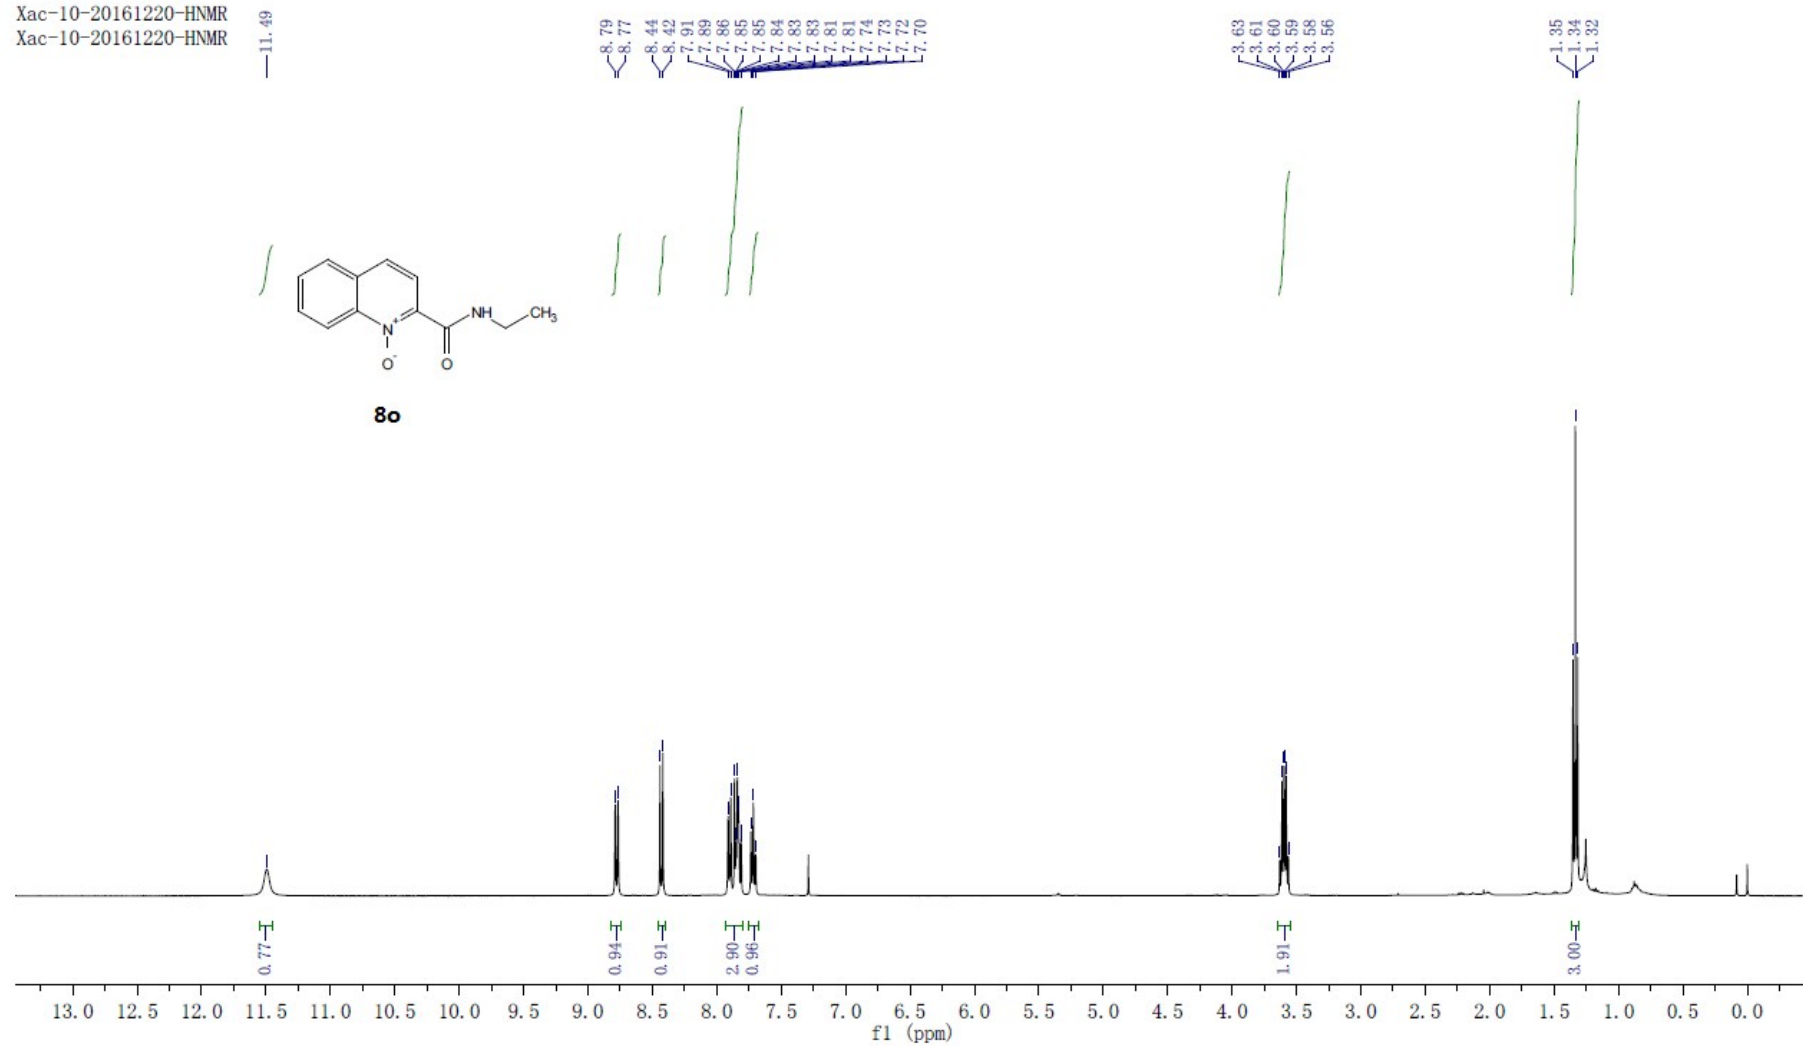



Xac-10

160.25

141.78

137.59

131.12

130.69

129.73

128.23

126.46

122.72

120.09

34.65

14.65

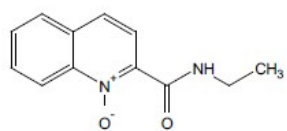

**8o**

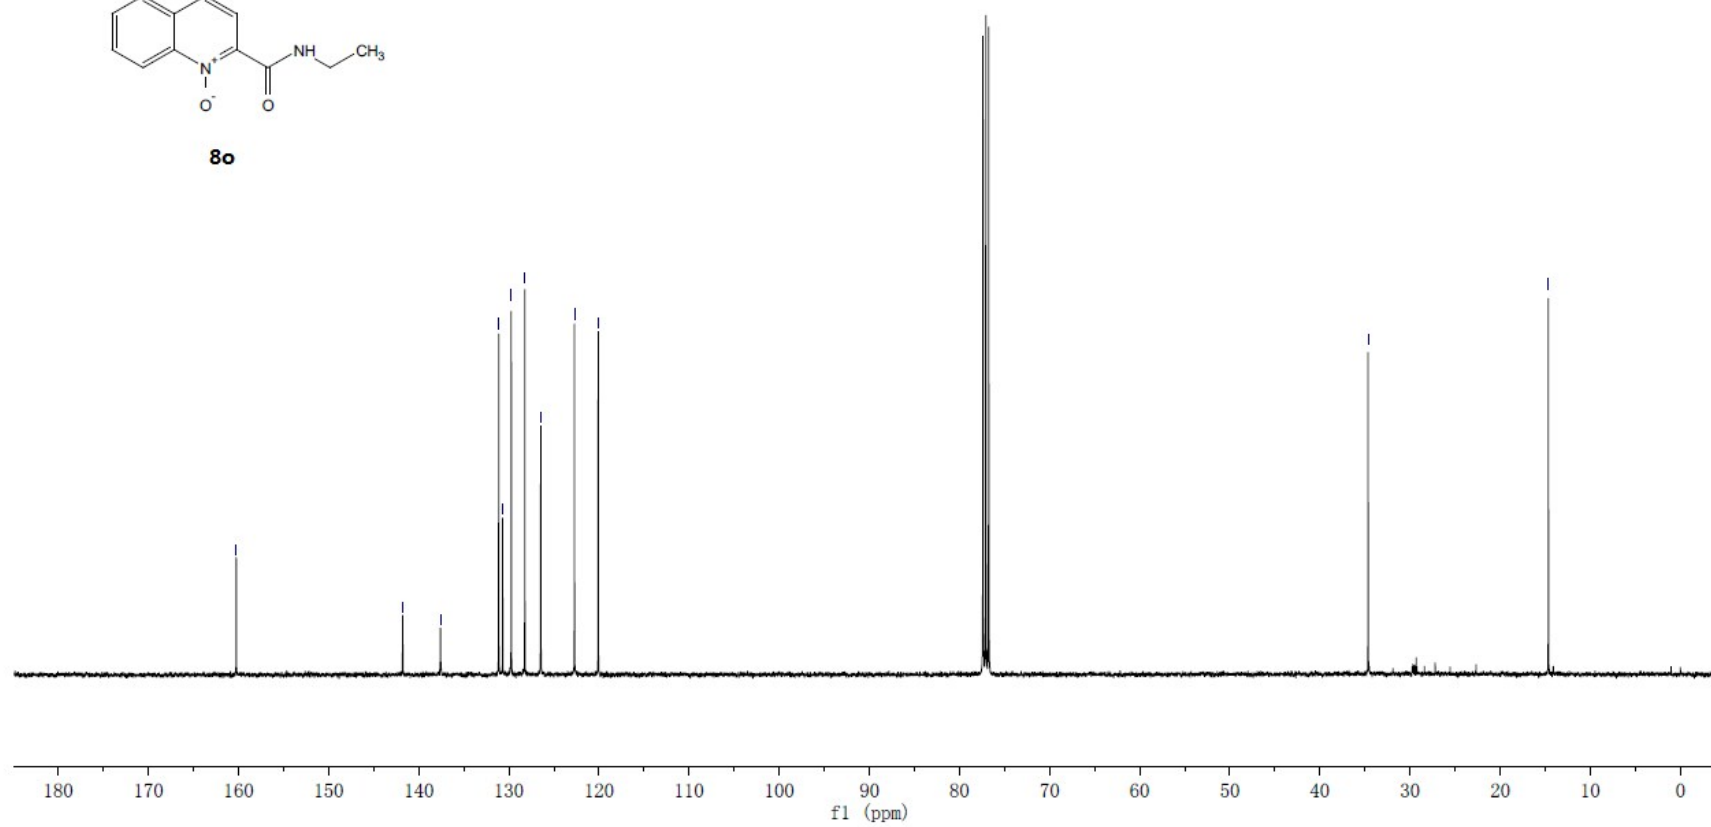

X3214

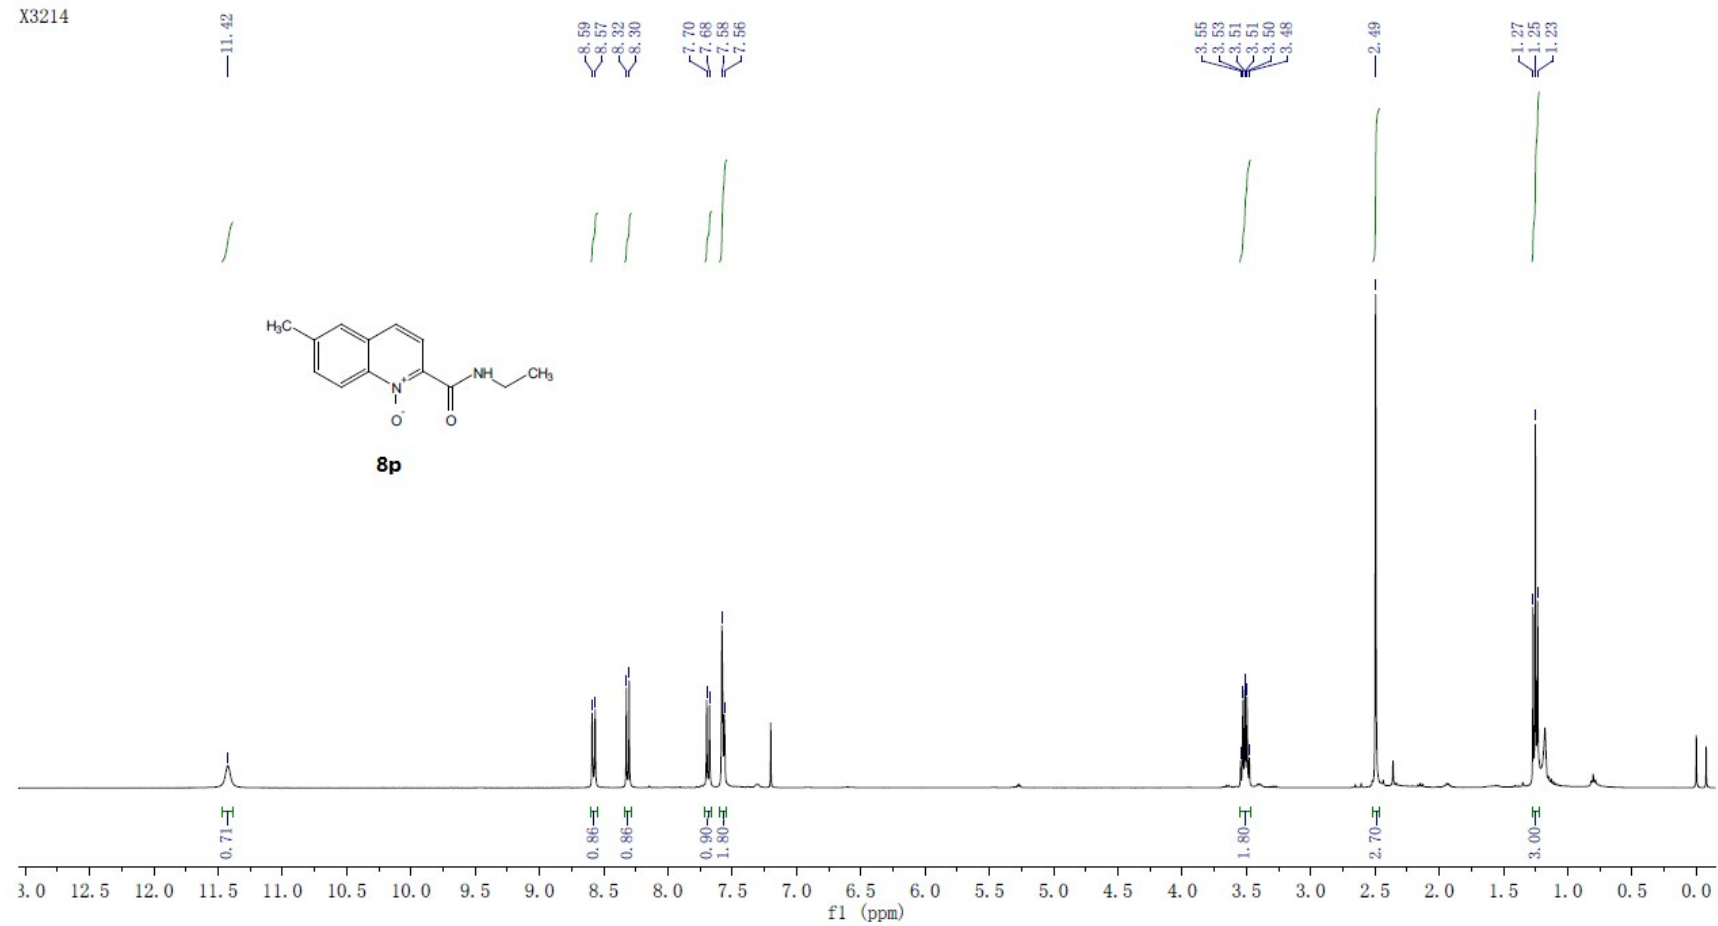

X3124

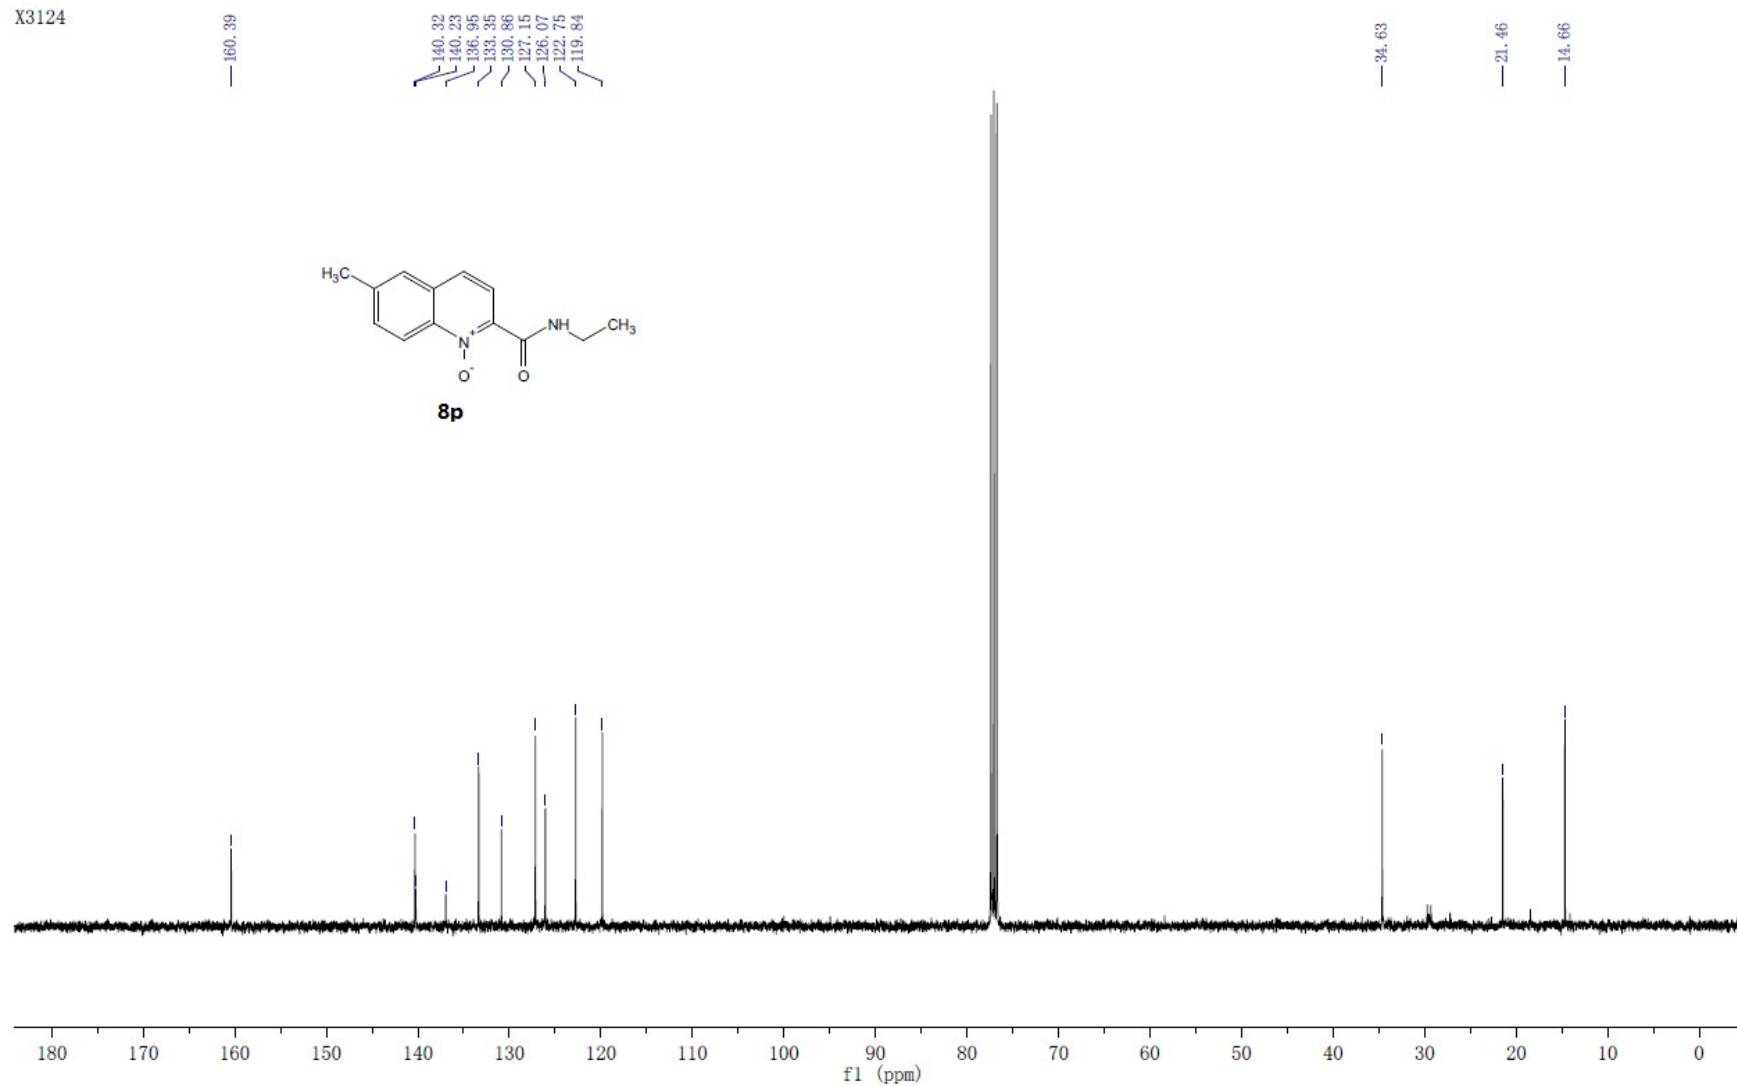

GX-123-20170823-HNMR  
GX-123-20170823-HNMR

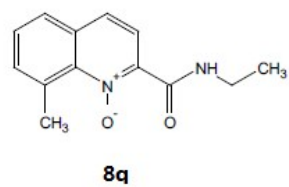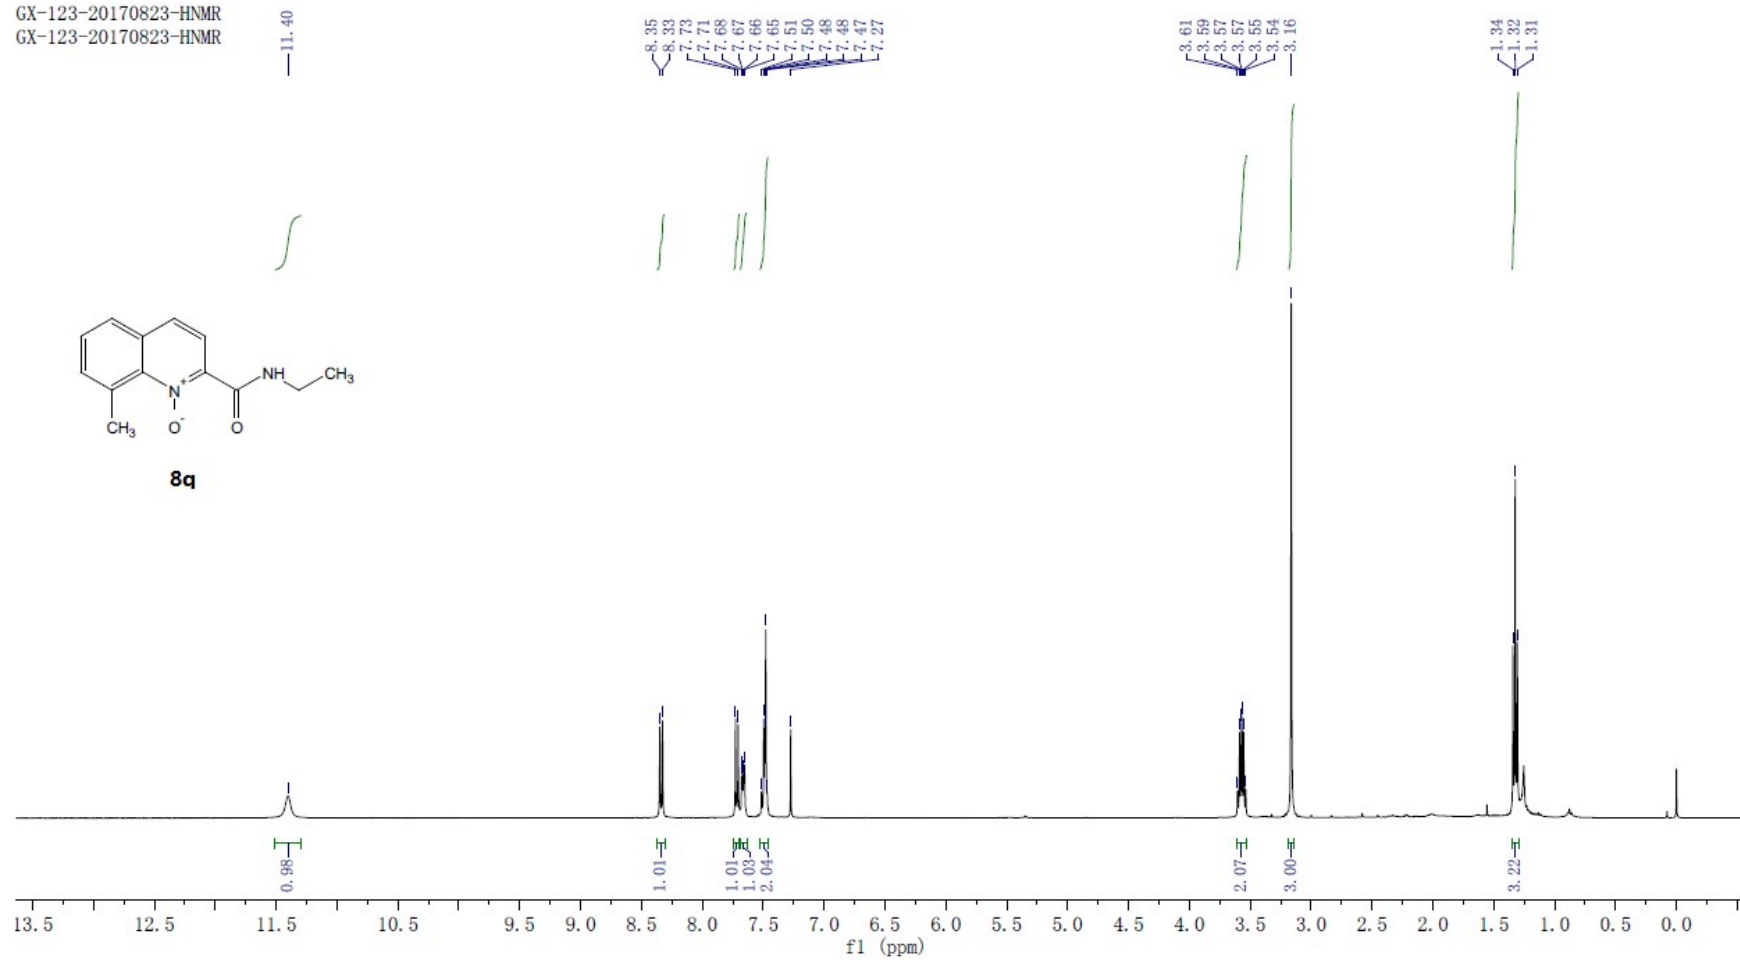

GX-123-20170823-CNMR  
GX-123-20170823-CNMR

160.75

141.78

138.50

134.31

134.26

132.61

129.14

126.94

125.64

122.65

34.60

25.69

14.67

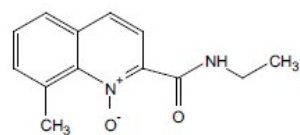

**8a**

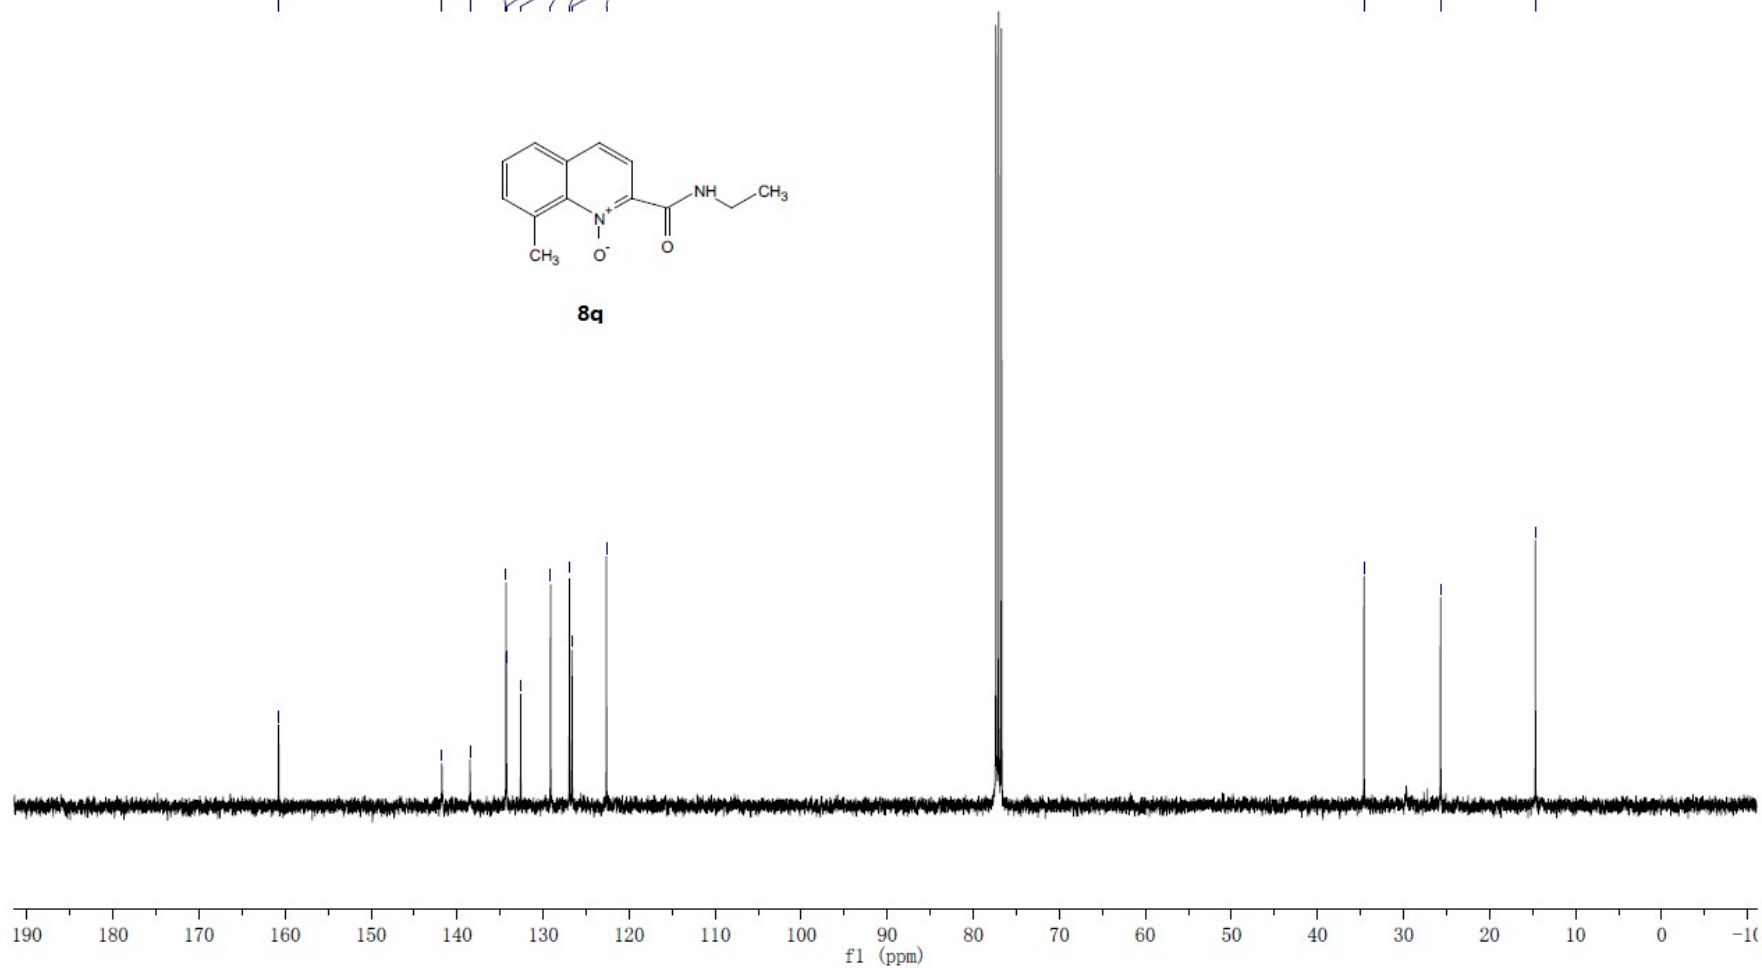

X2230-20161215-HNMR  
X2230-20161215-HNMR

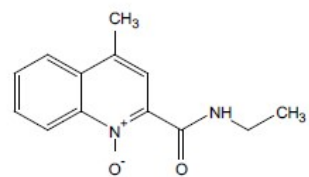

**8r**

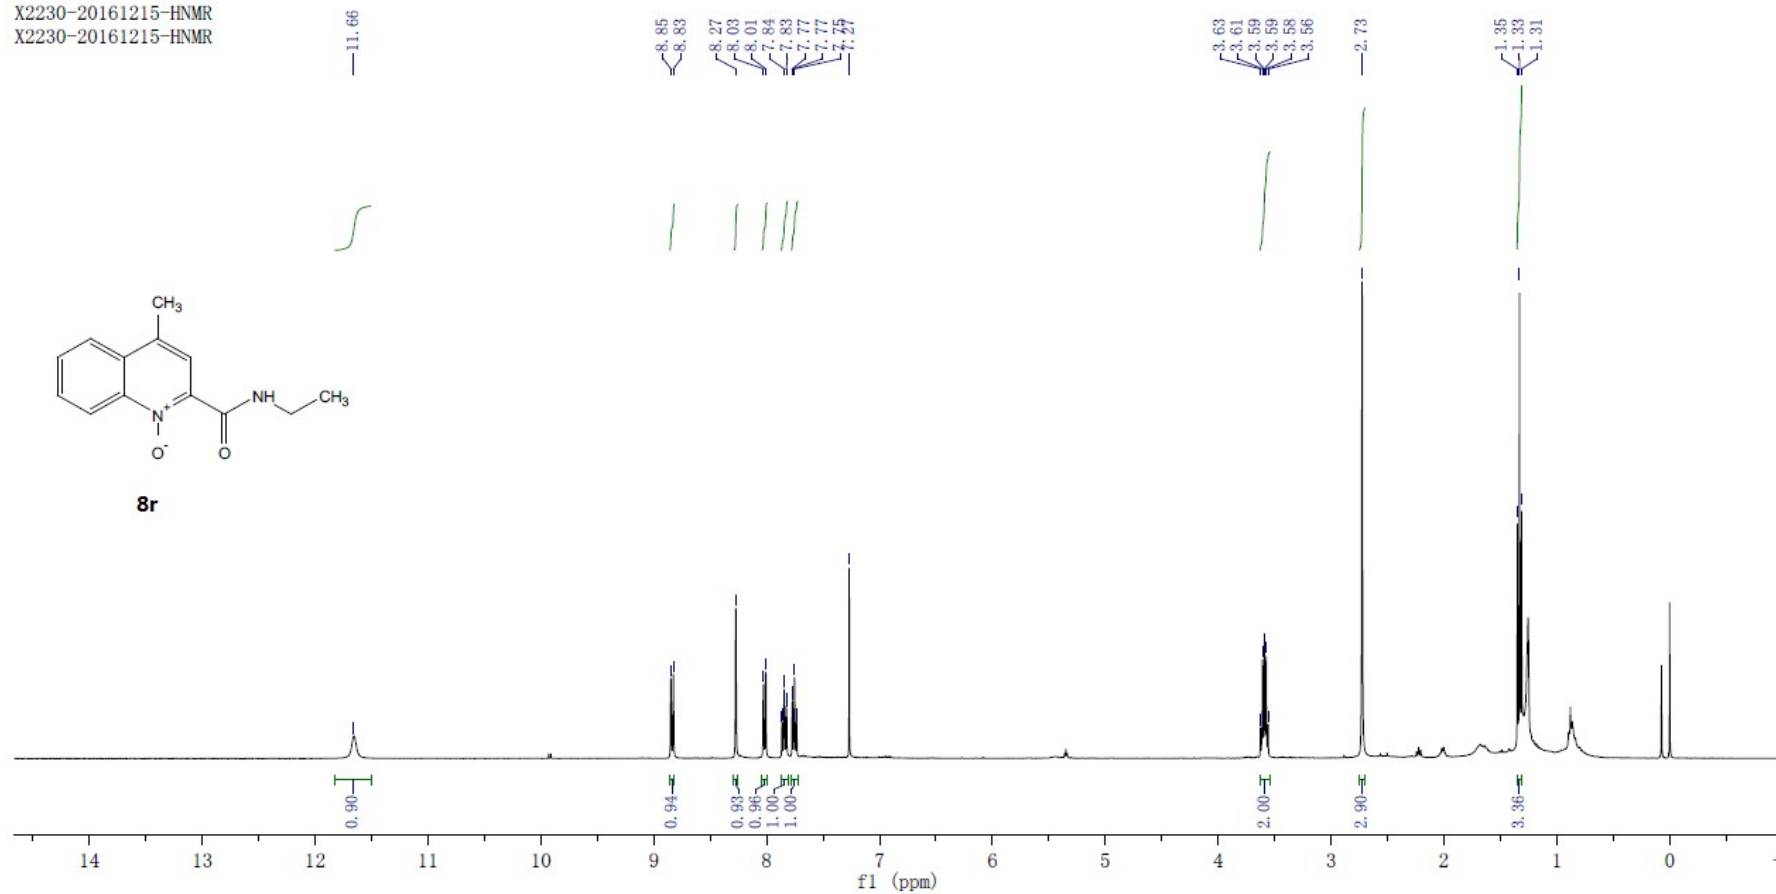

X2230

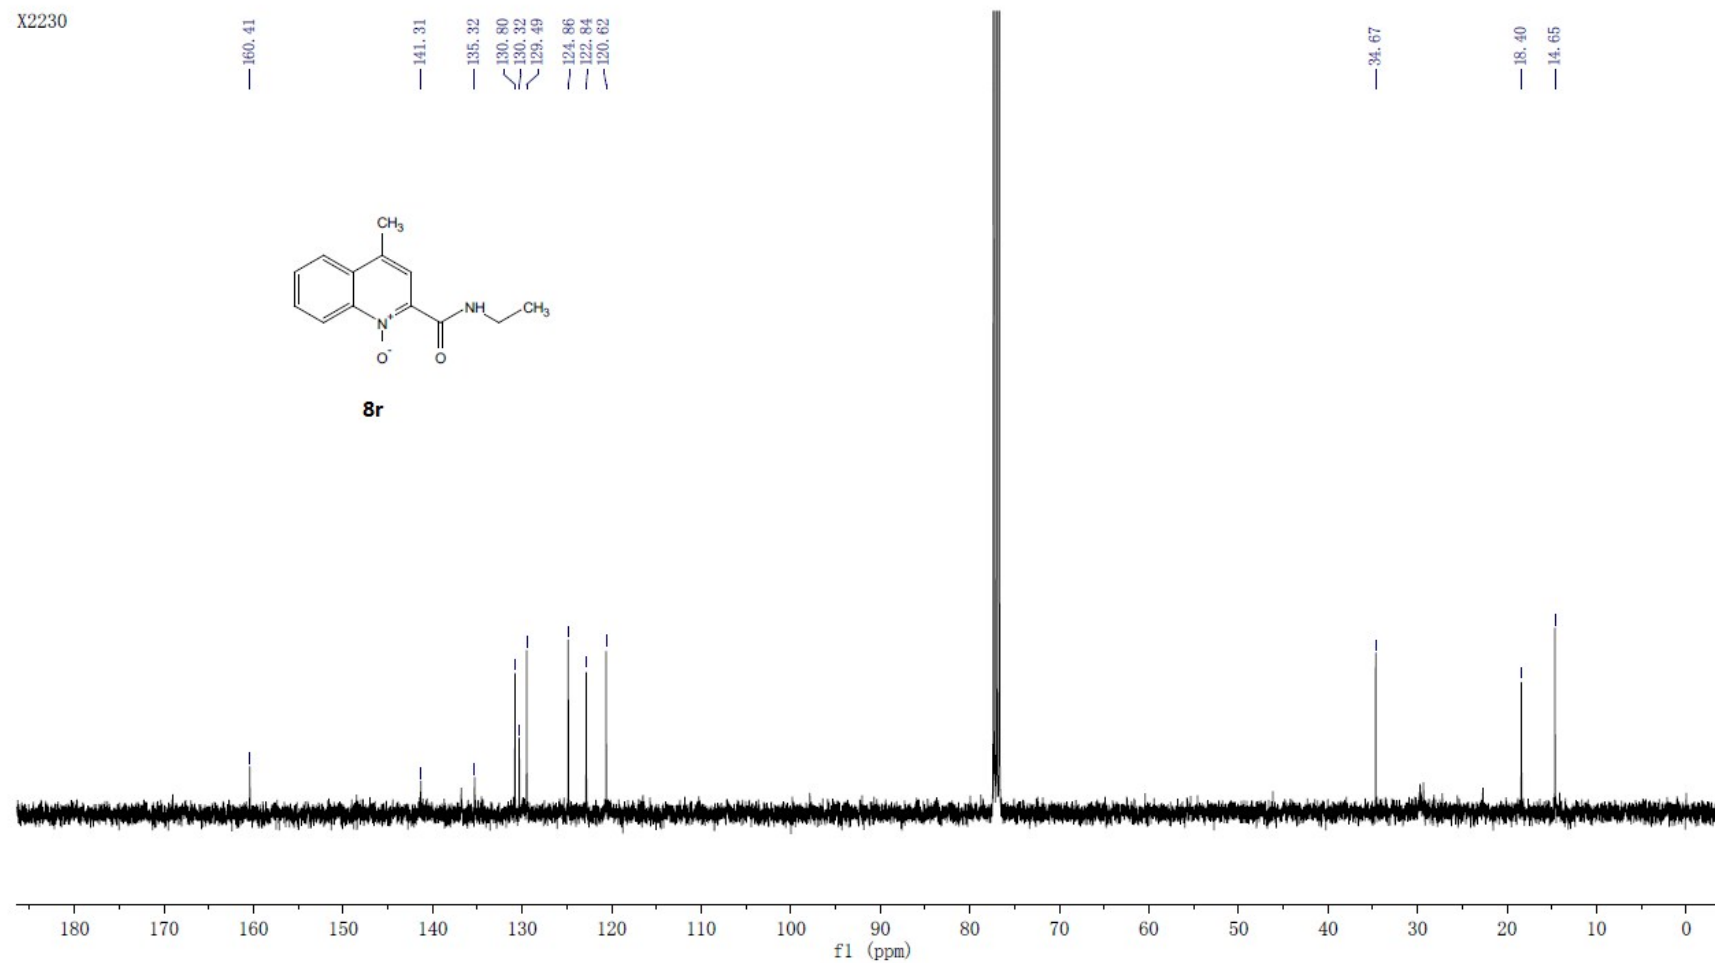

aXGX126

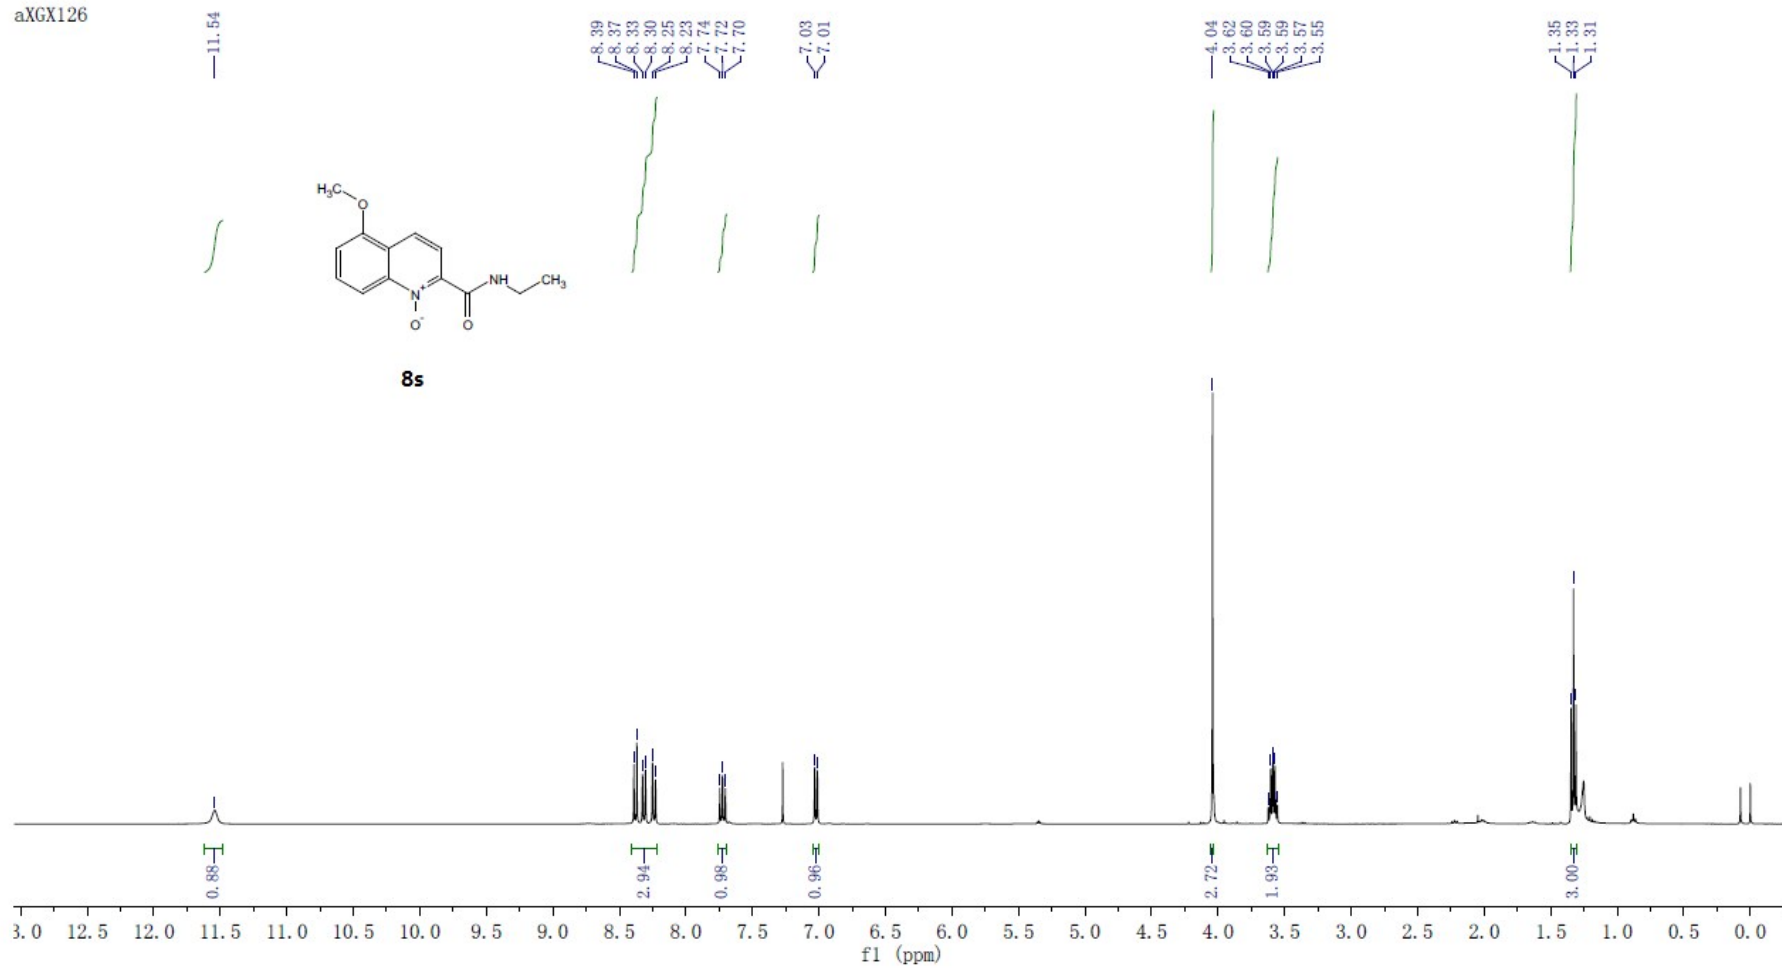



aXGX246

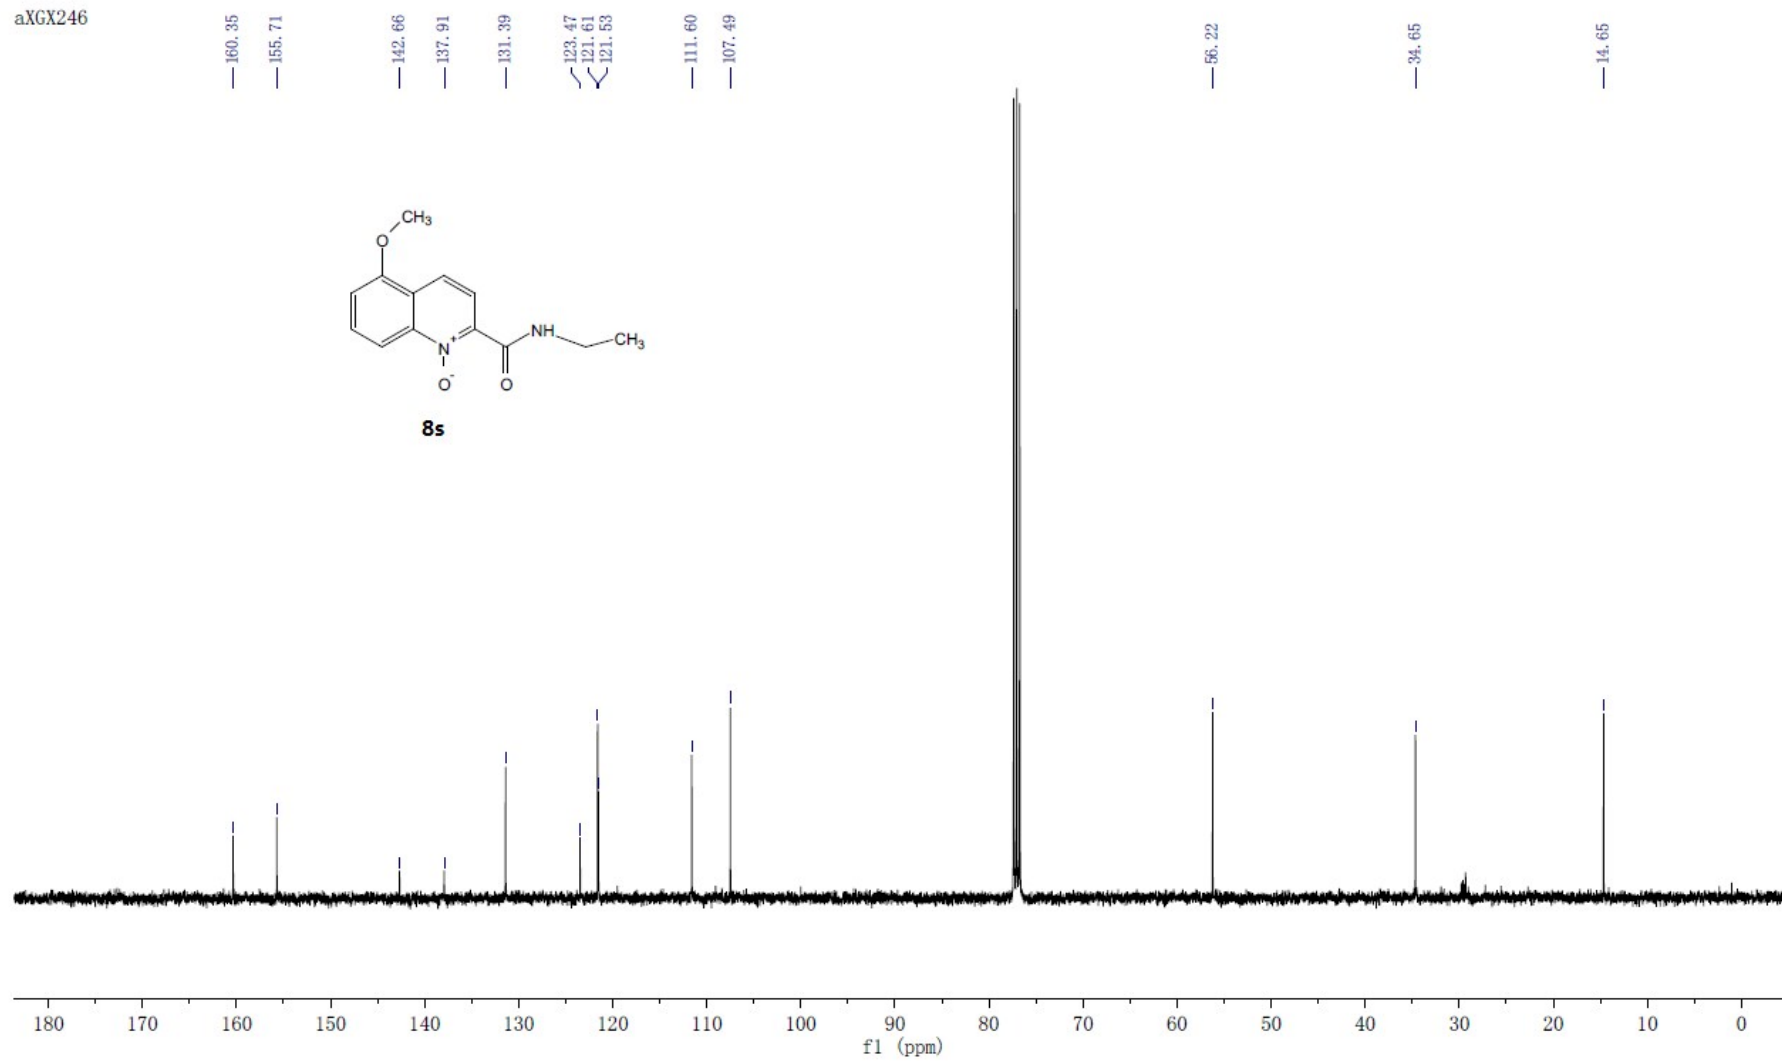

XG-001-20161221-HNMR

XG-001-20161221-HNMR

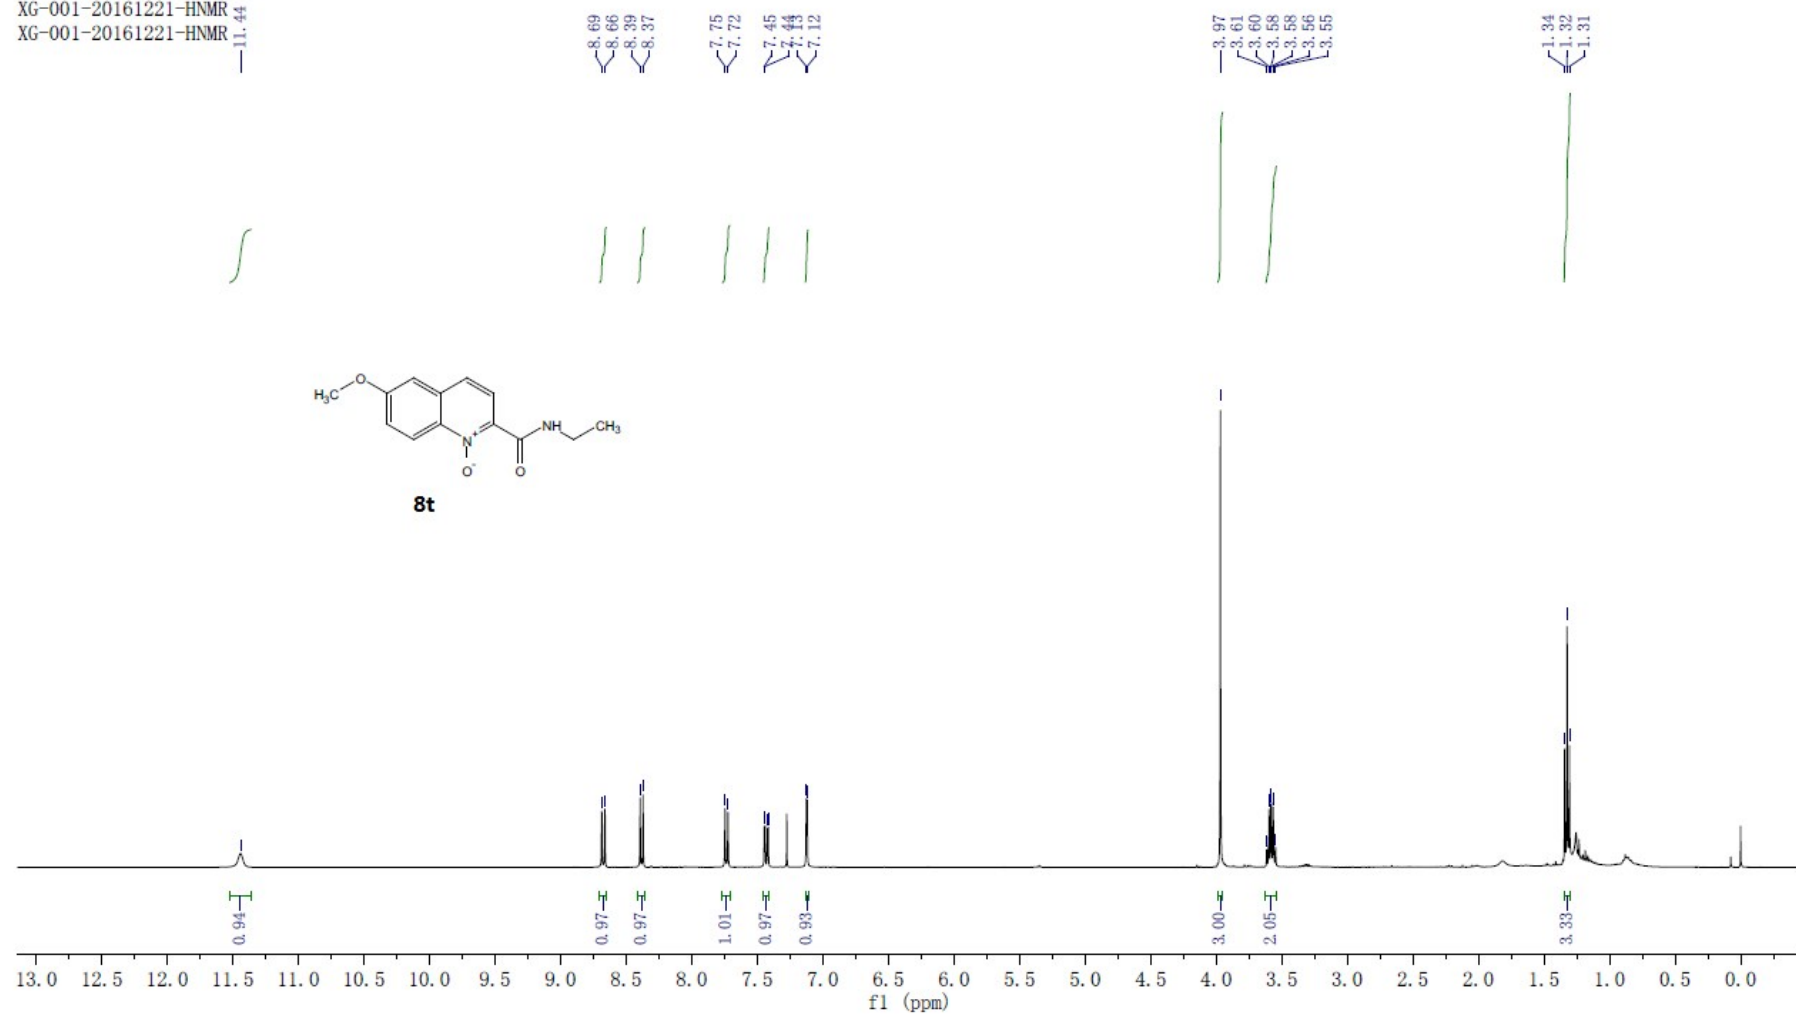

XC-001

160.44  
160.31

137.23  
135.93  
132.43

125.50  
123.48  
123.38  
121.81

105.86

55.85

34.60

14.68

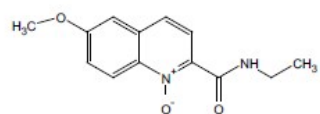

**8t**

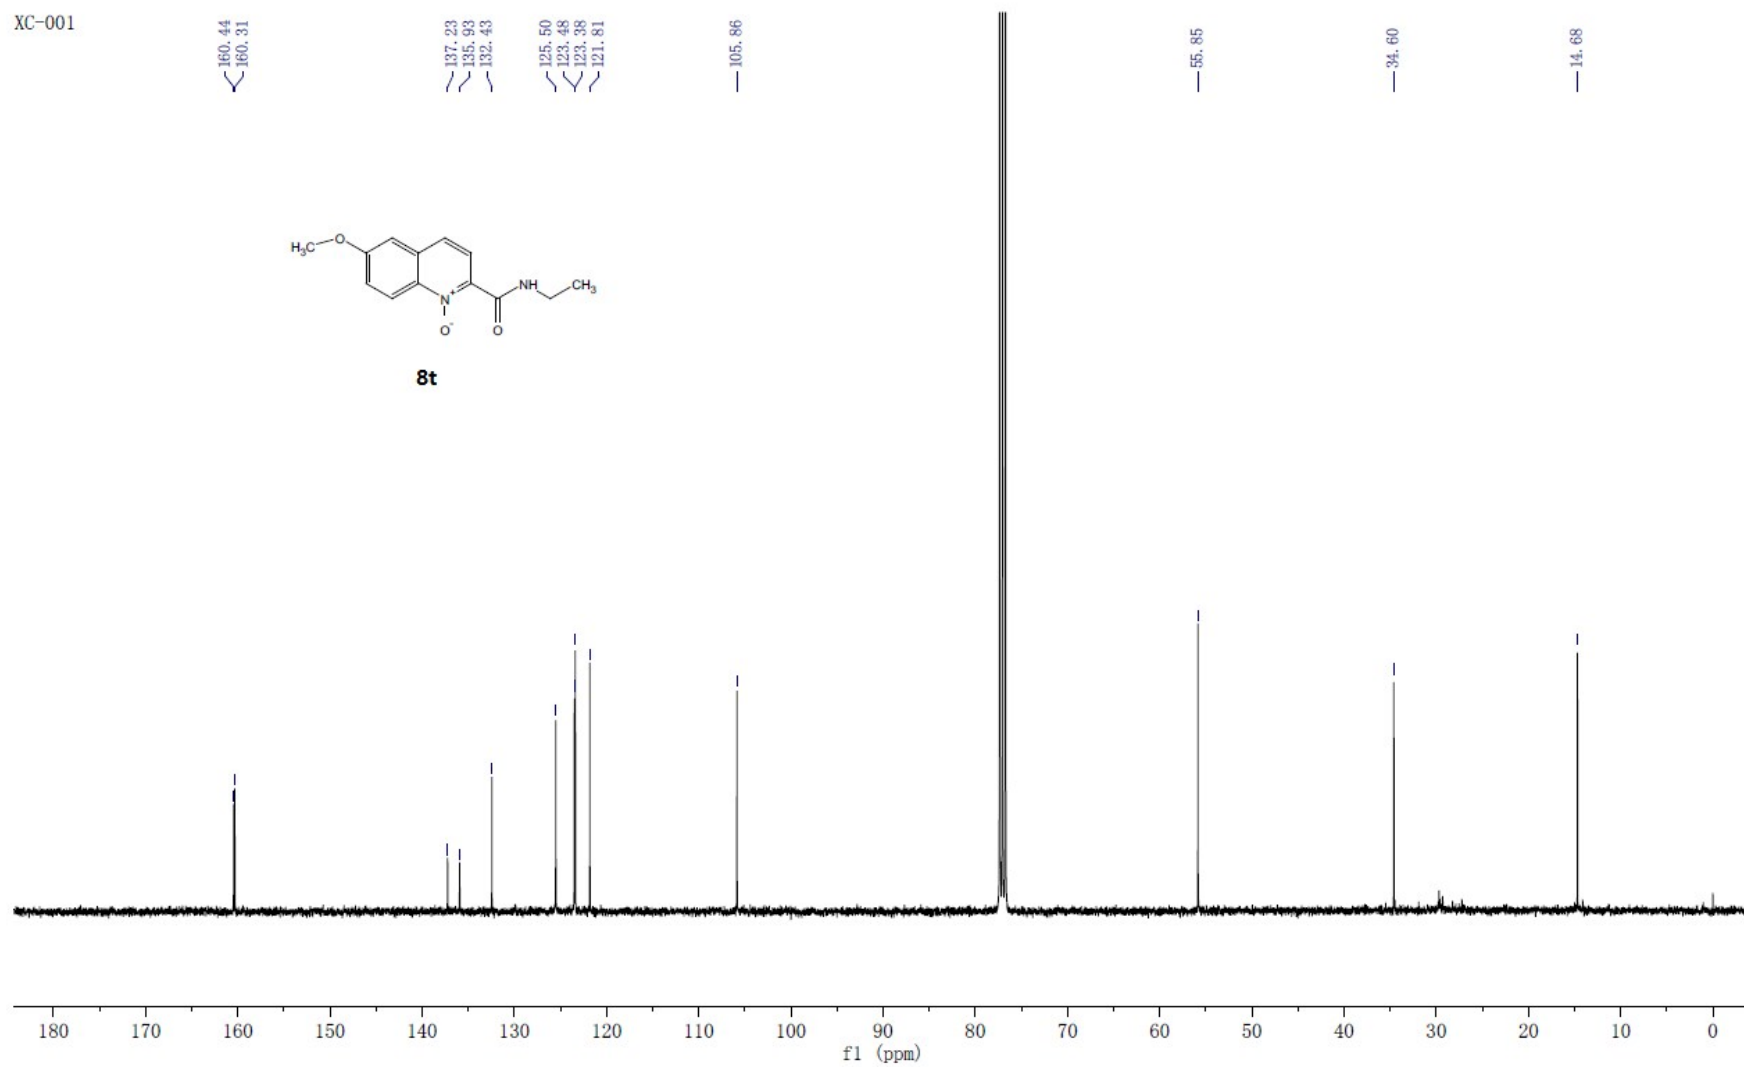

Gg-808-20170823-HNMR  
Gg-808-20170823-HNMR

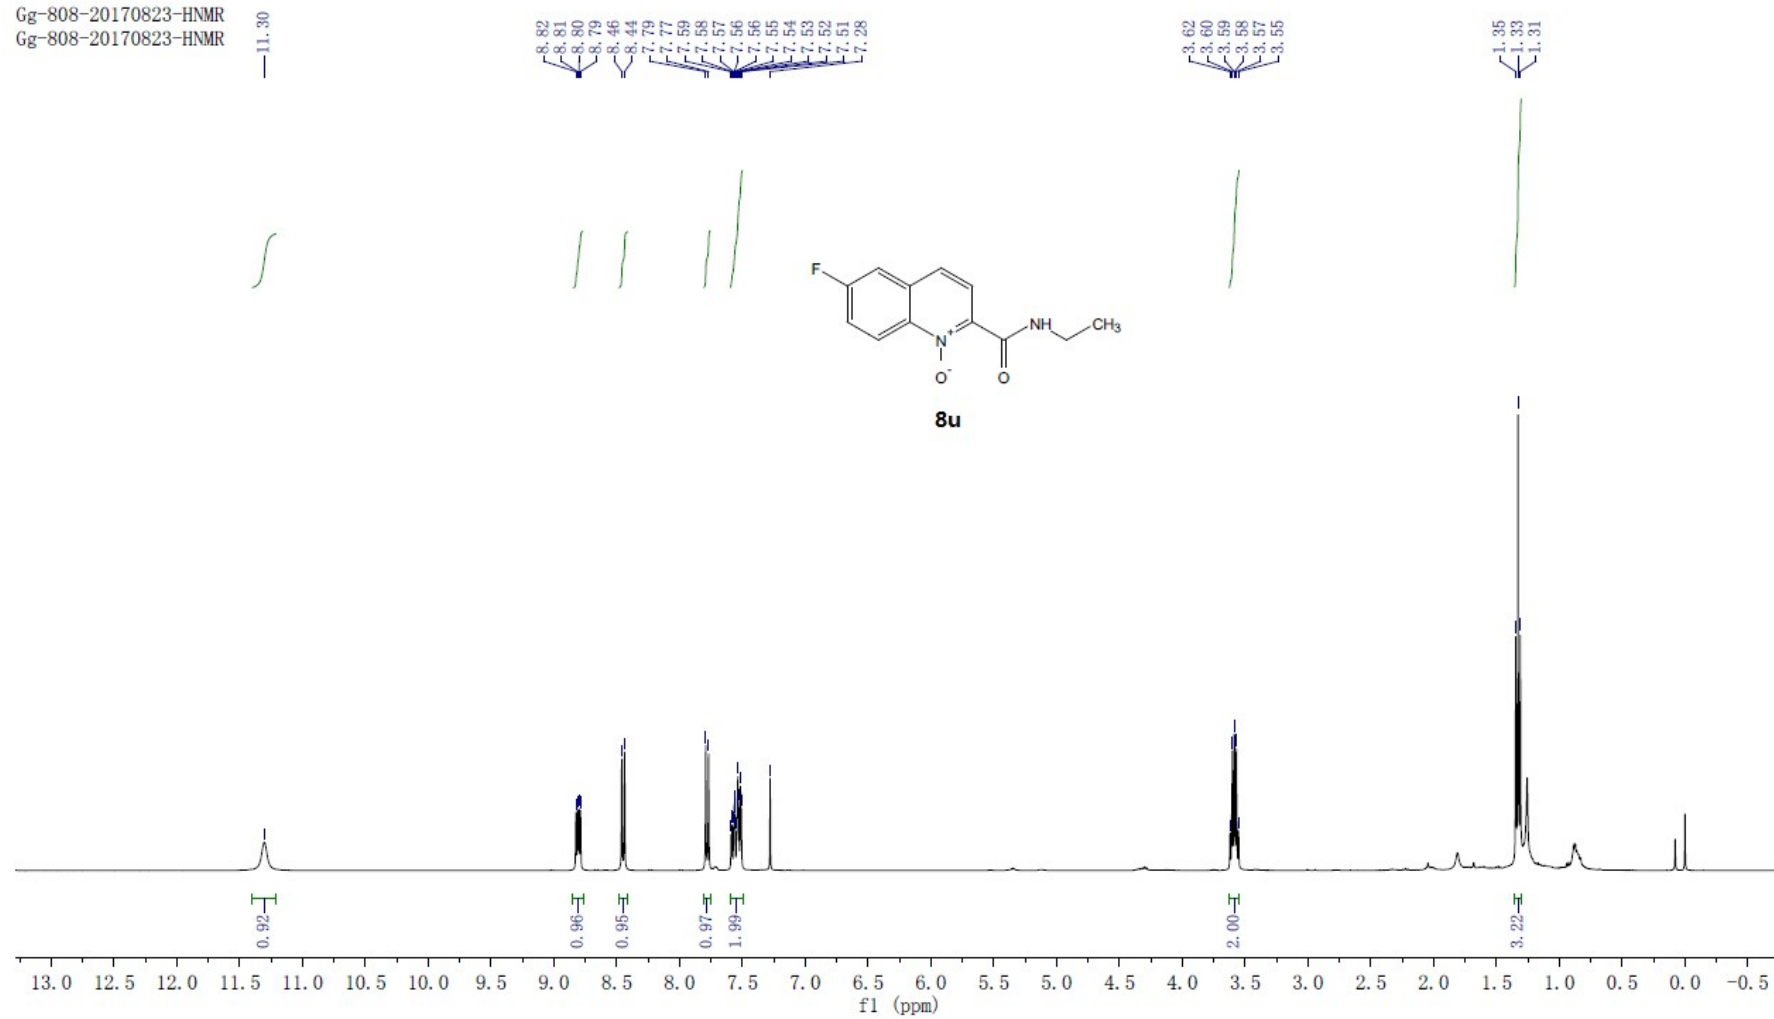

Gg-808-20170823-CNMR  
Gg-808-20170823-CNMR

163.77  
161.24  
160.00  
138.80  
137.22  
132.10  
132.00  
125.58  
125.53  
124.07  
123.41  
123.31  
121.07  
120.81  
111.90  
111.67

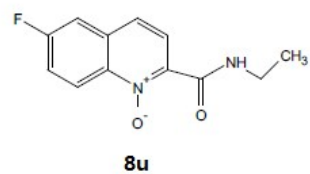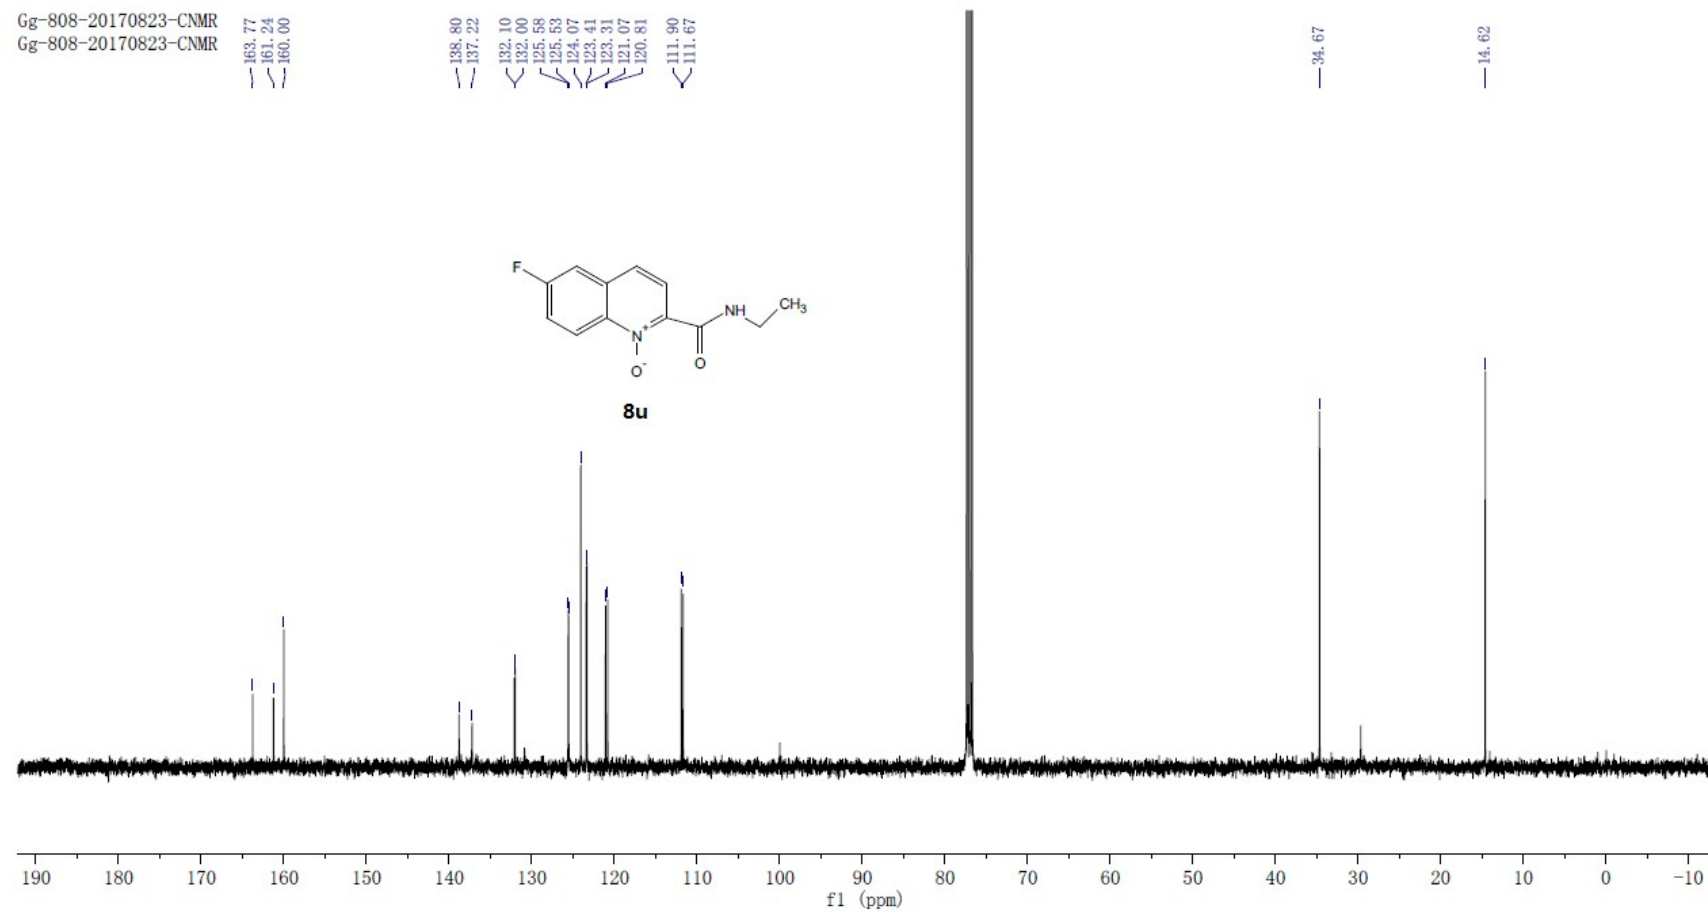

XGL-04

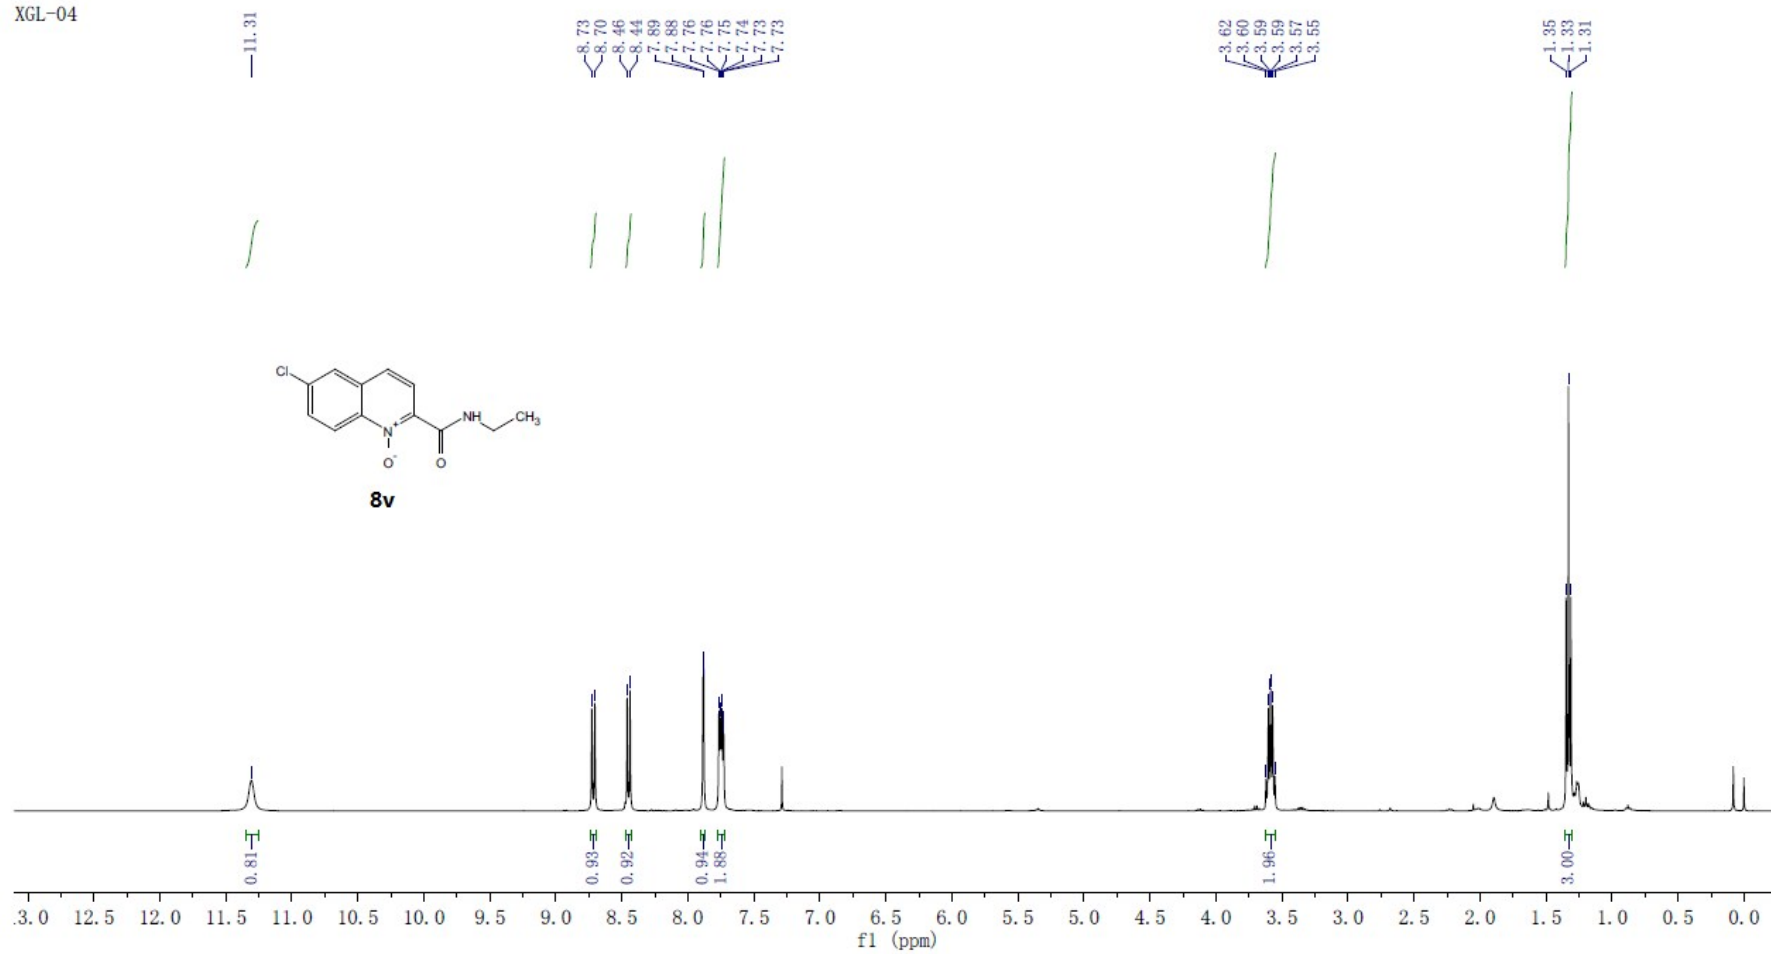

XGL-04

159.89  
140.30  
137.68  
136.22  
131.84  
131.40  
126.89  
125.20  
124.08  
122.04

34.70

14.62

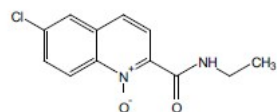

**8v**

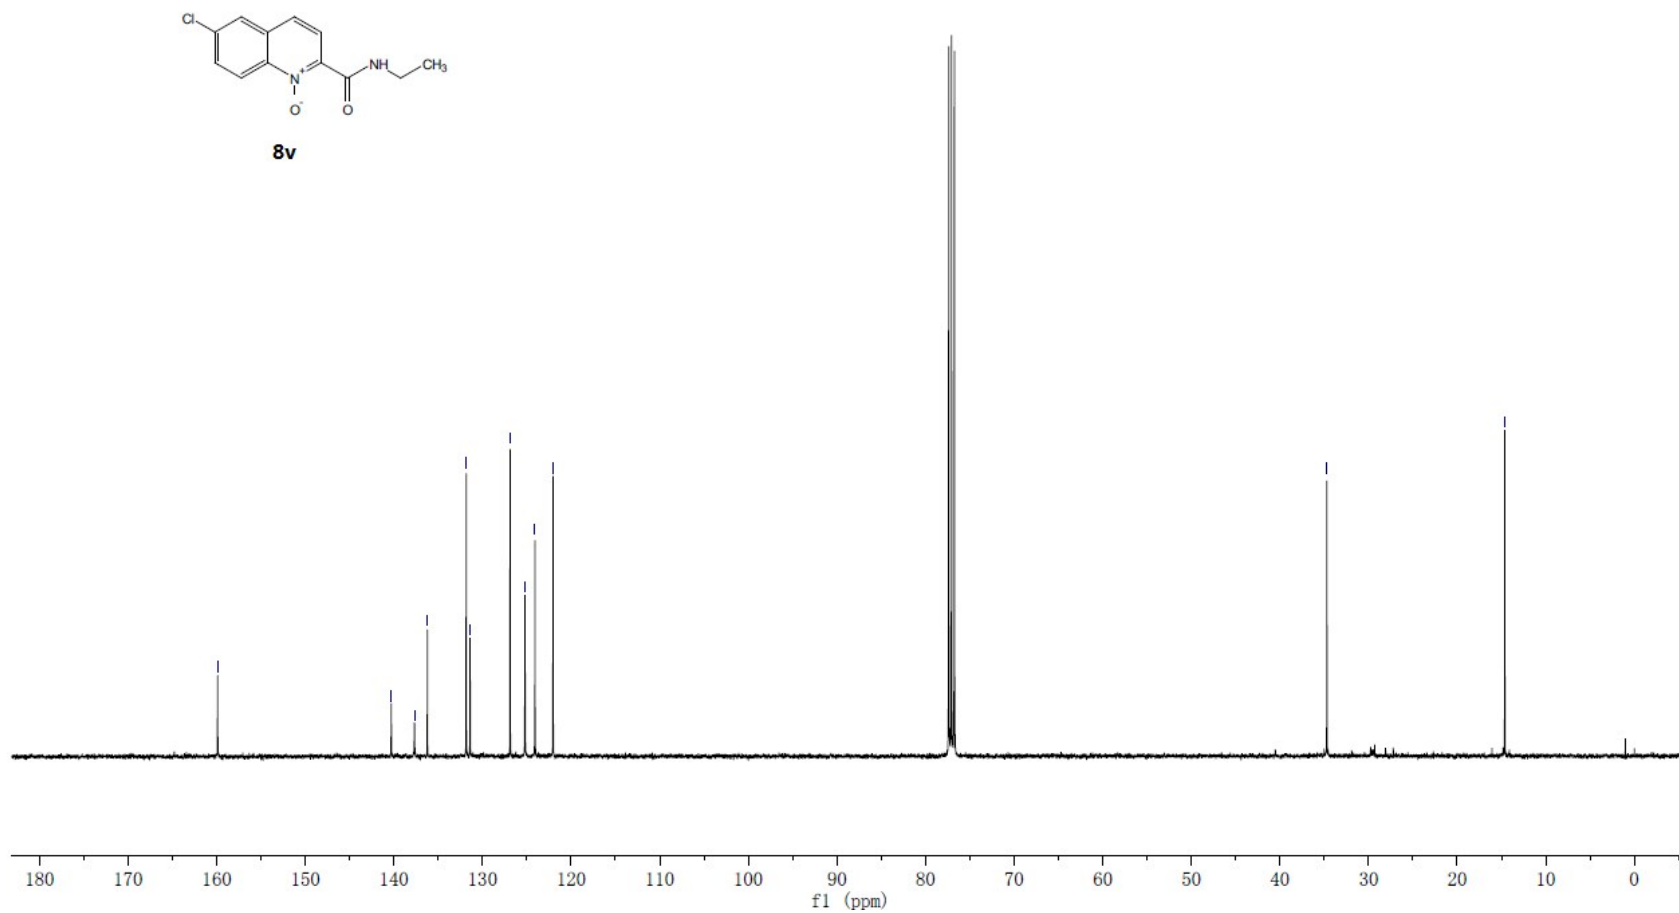

X1b-212

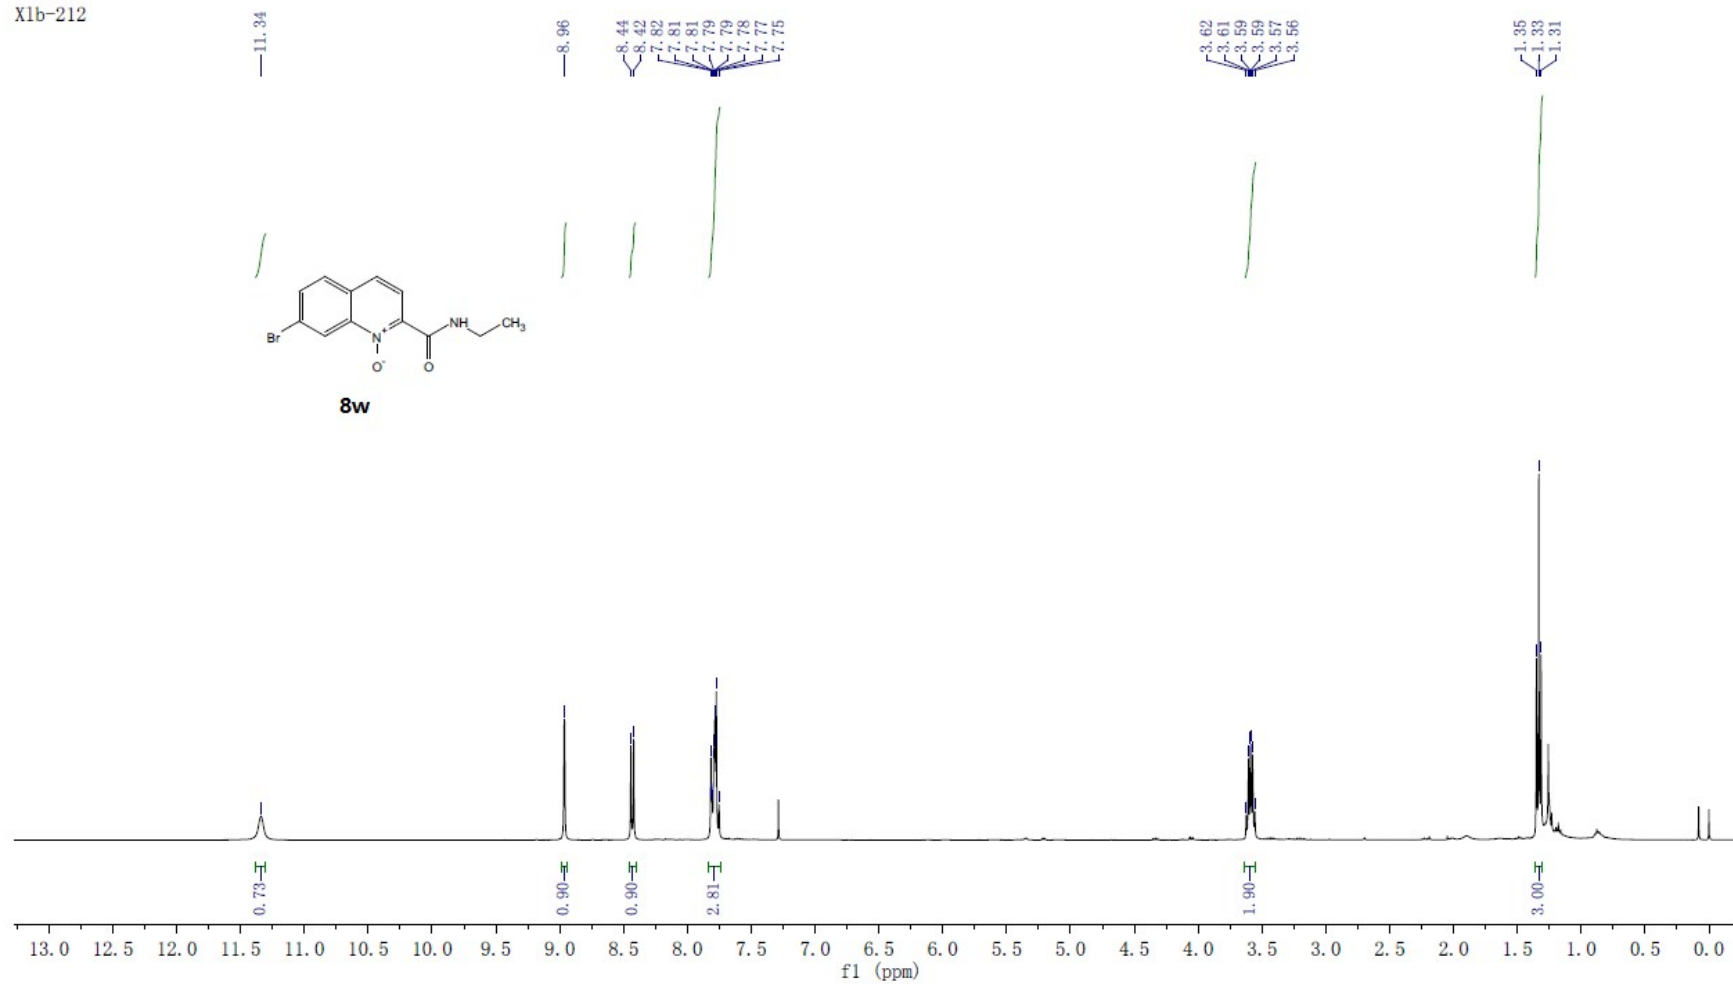



X1b-212-20161220-CNMR  
X1b-212-20161220-CNMR

159.84  
142.14  
138.09  
133.40  
129.43  
129.29  
126.00  
125.83  
123.14  
122.98

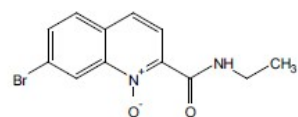

**8w**

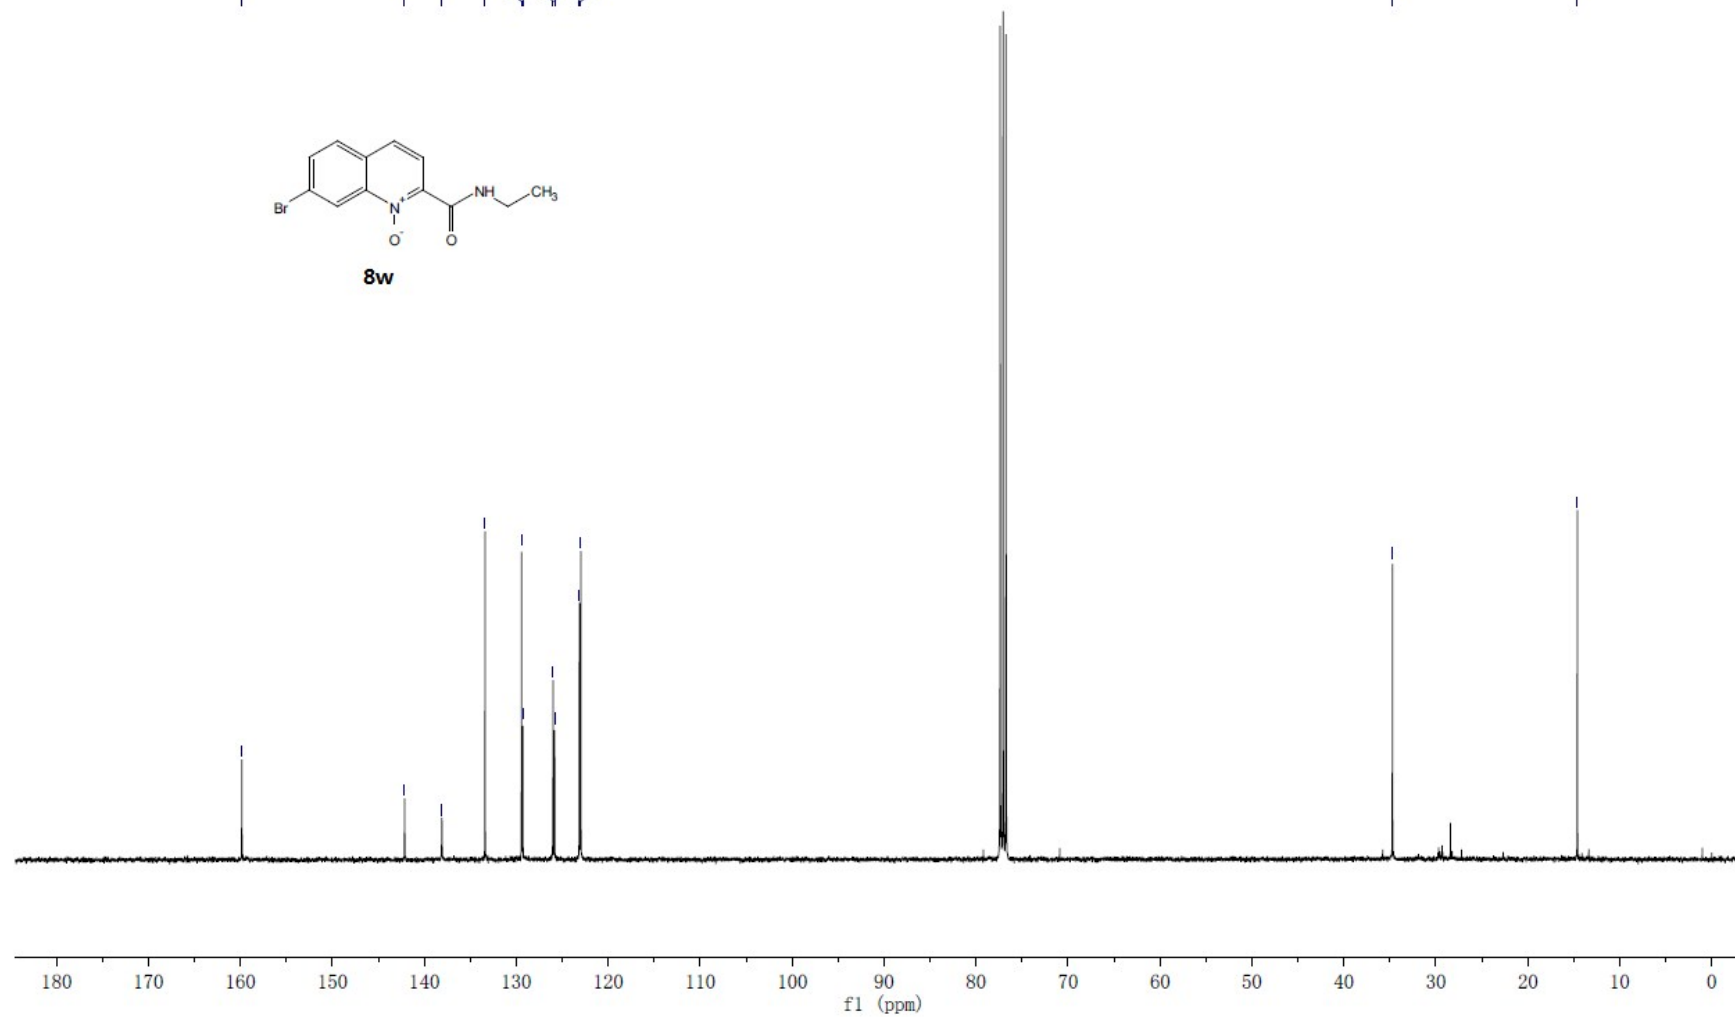

XGX-004

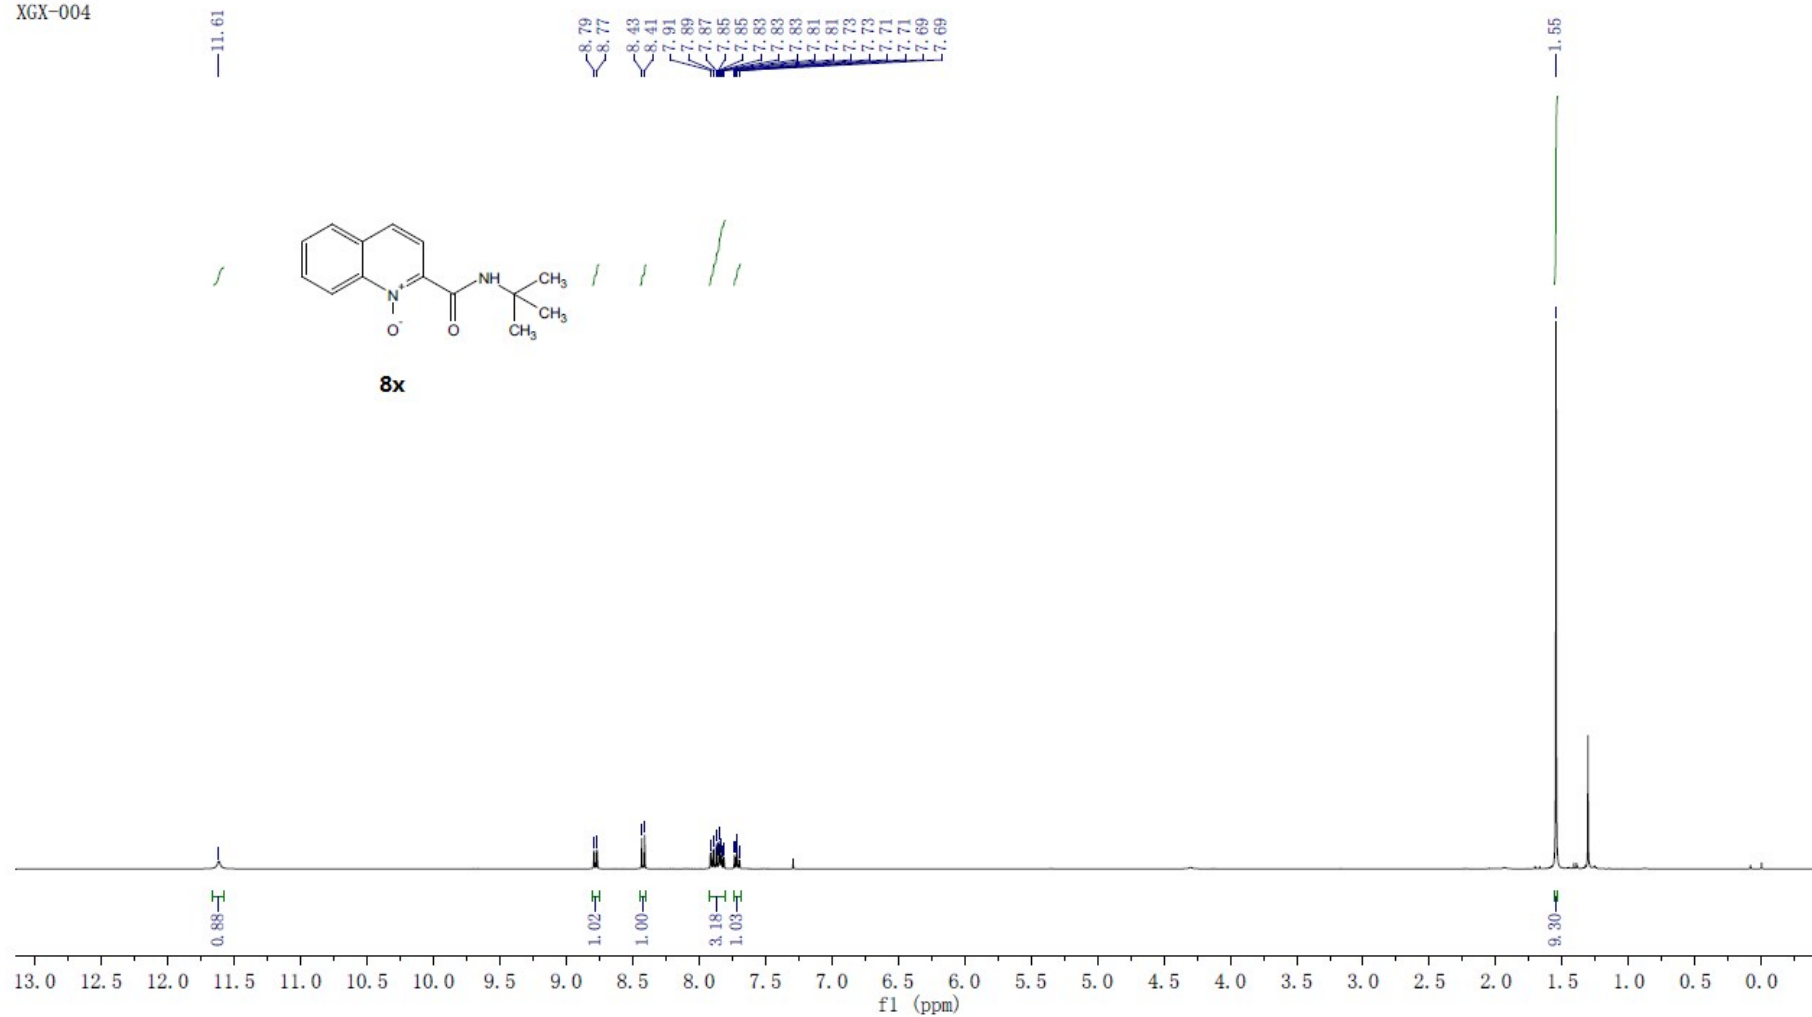

XGX-004-20161223-CNMR  
XGX-004-20161223-CNMR

158.98

141.71

138.46

131.13

130.64

129.64

128.23

126.58

122.49

120.03

51.46

28.71

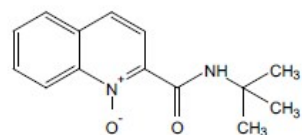

**8x**

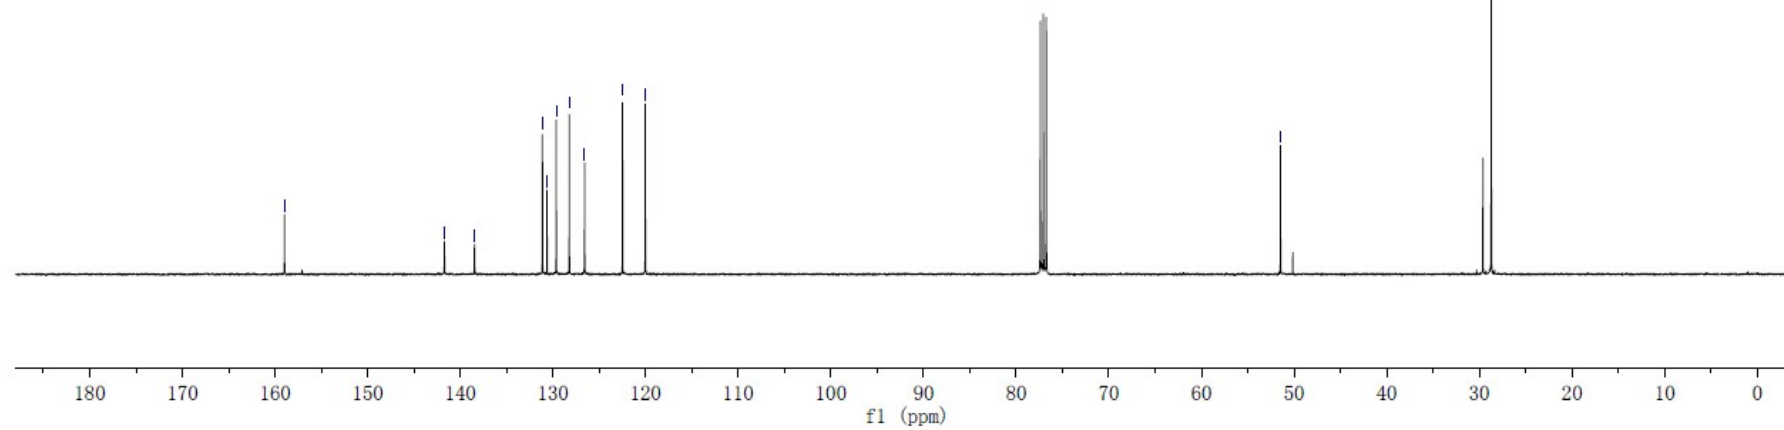

Xbb-189

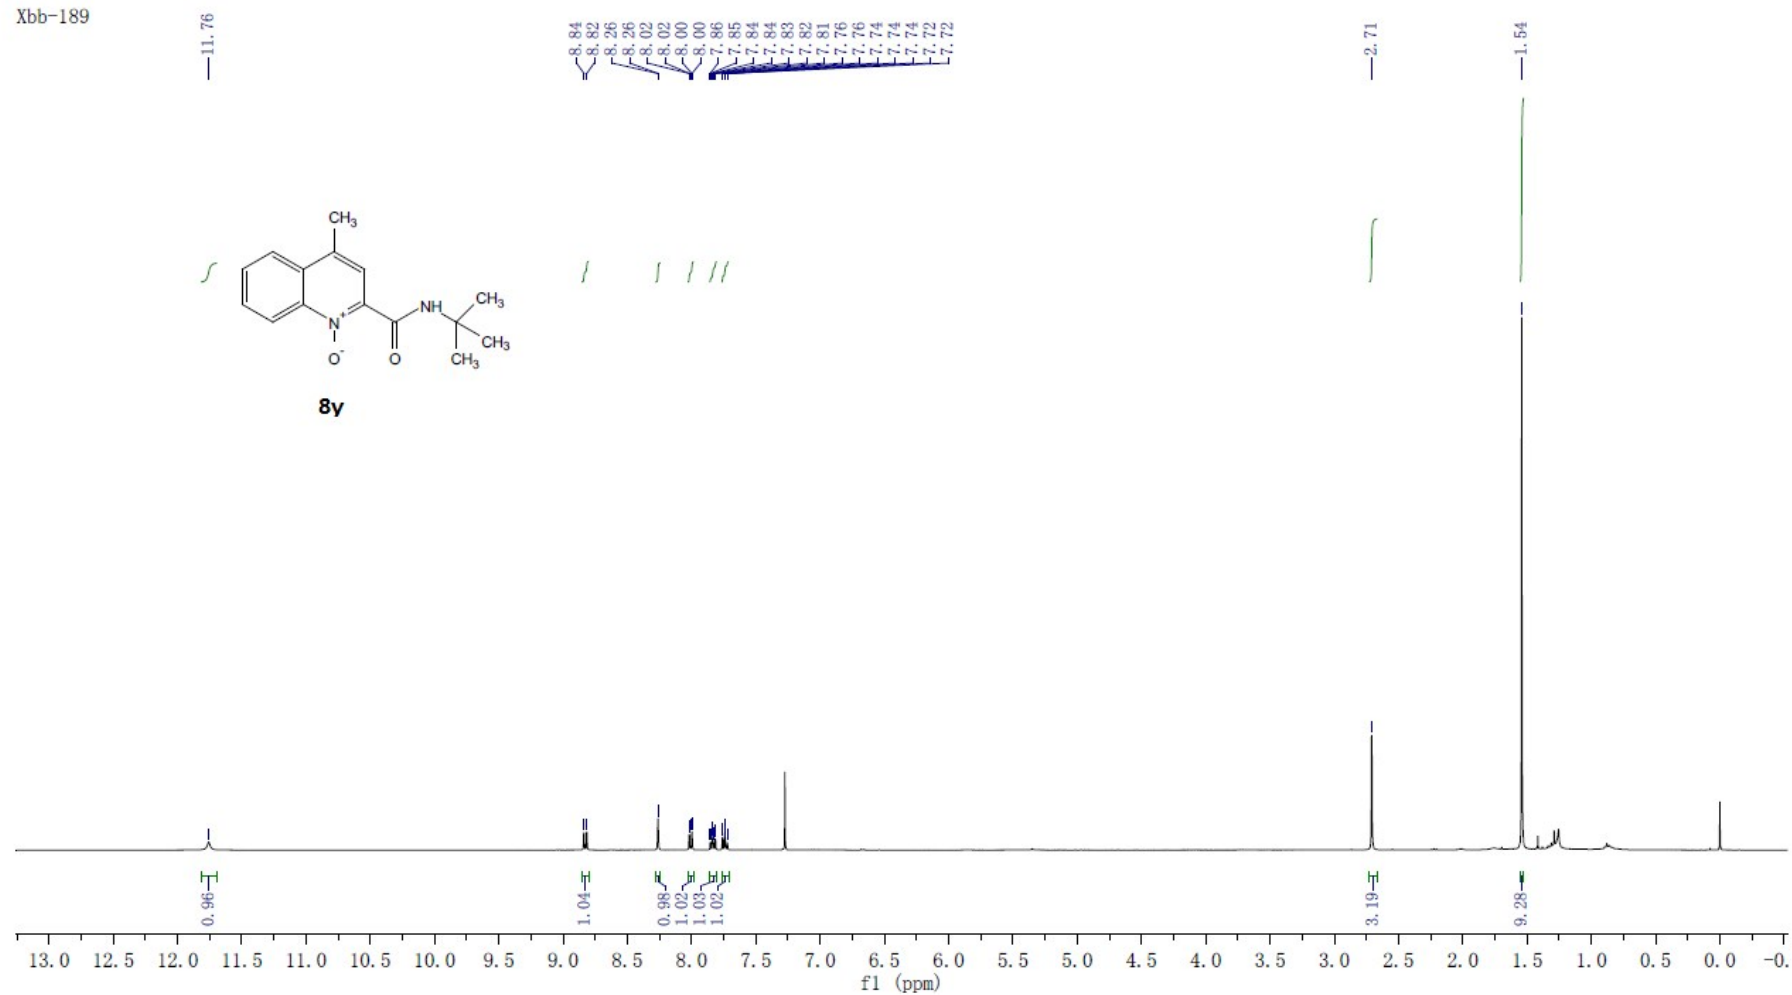

Xbb-189

159.14

141.23

137.65

135.37

130.78

130.26

129.39

124.84

122.66

120.56

51.46

28.70

18.42

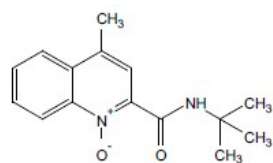

**8y**

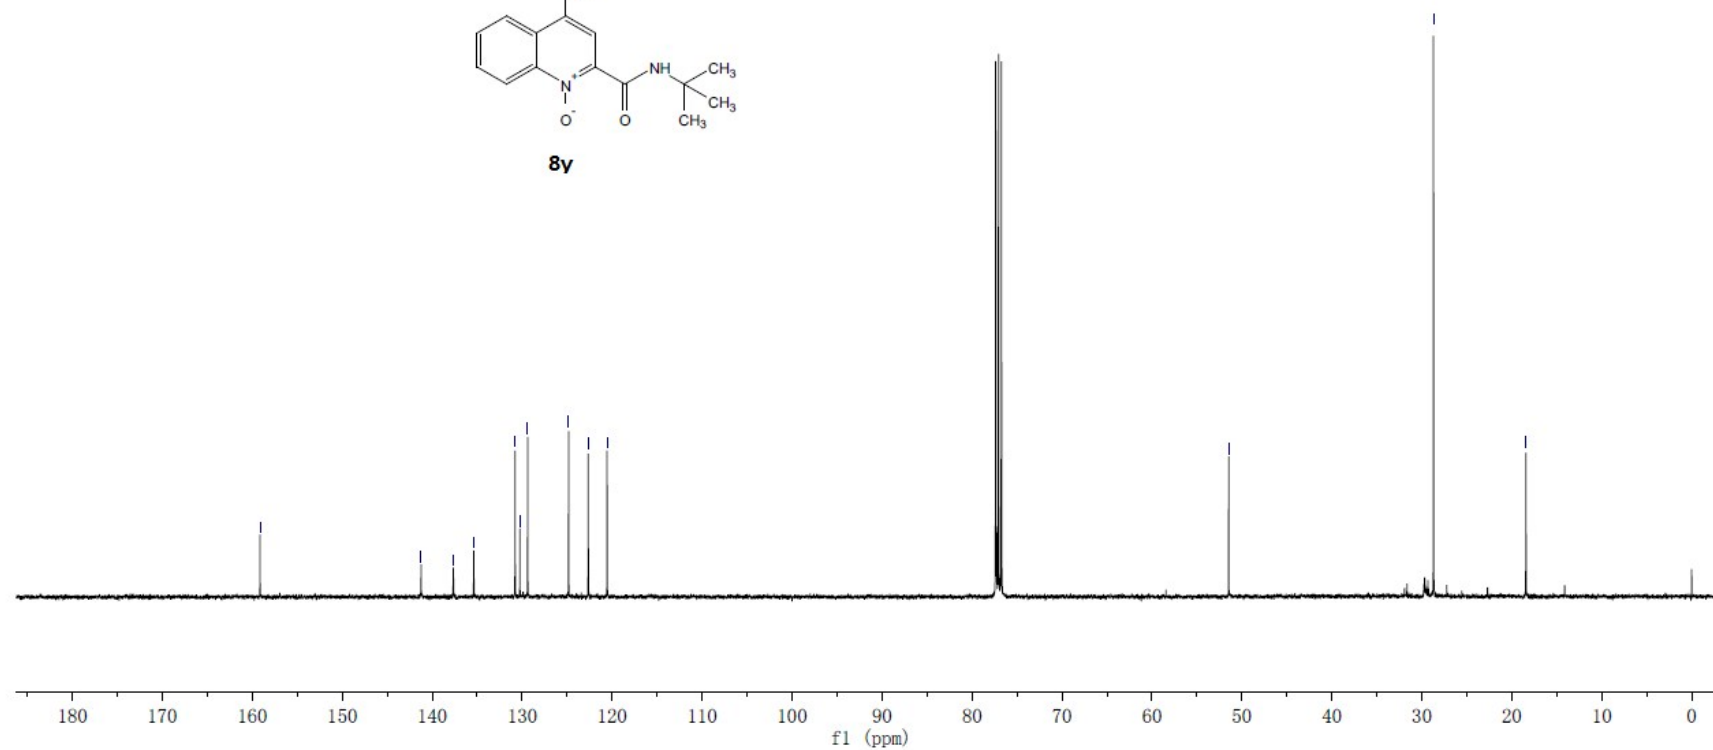

CX-120

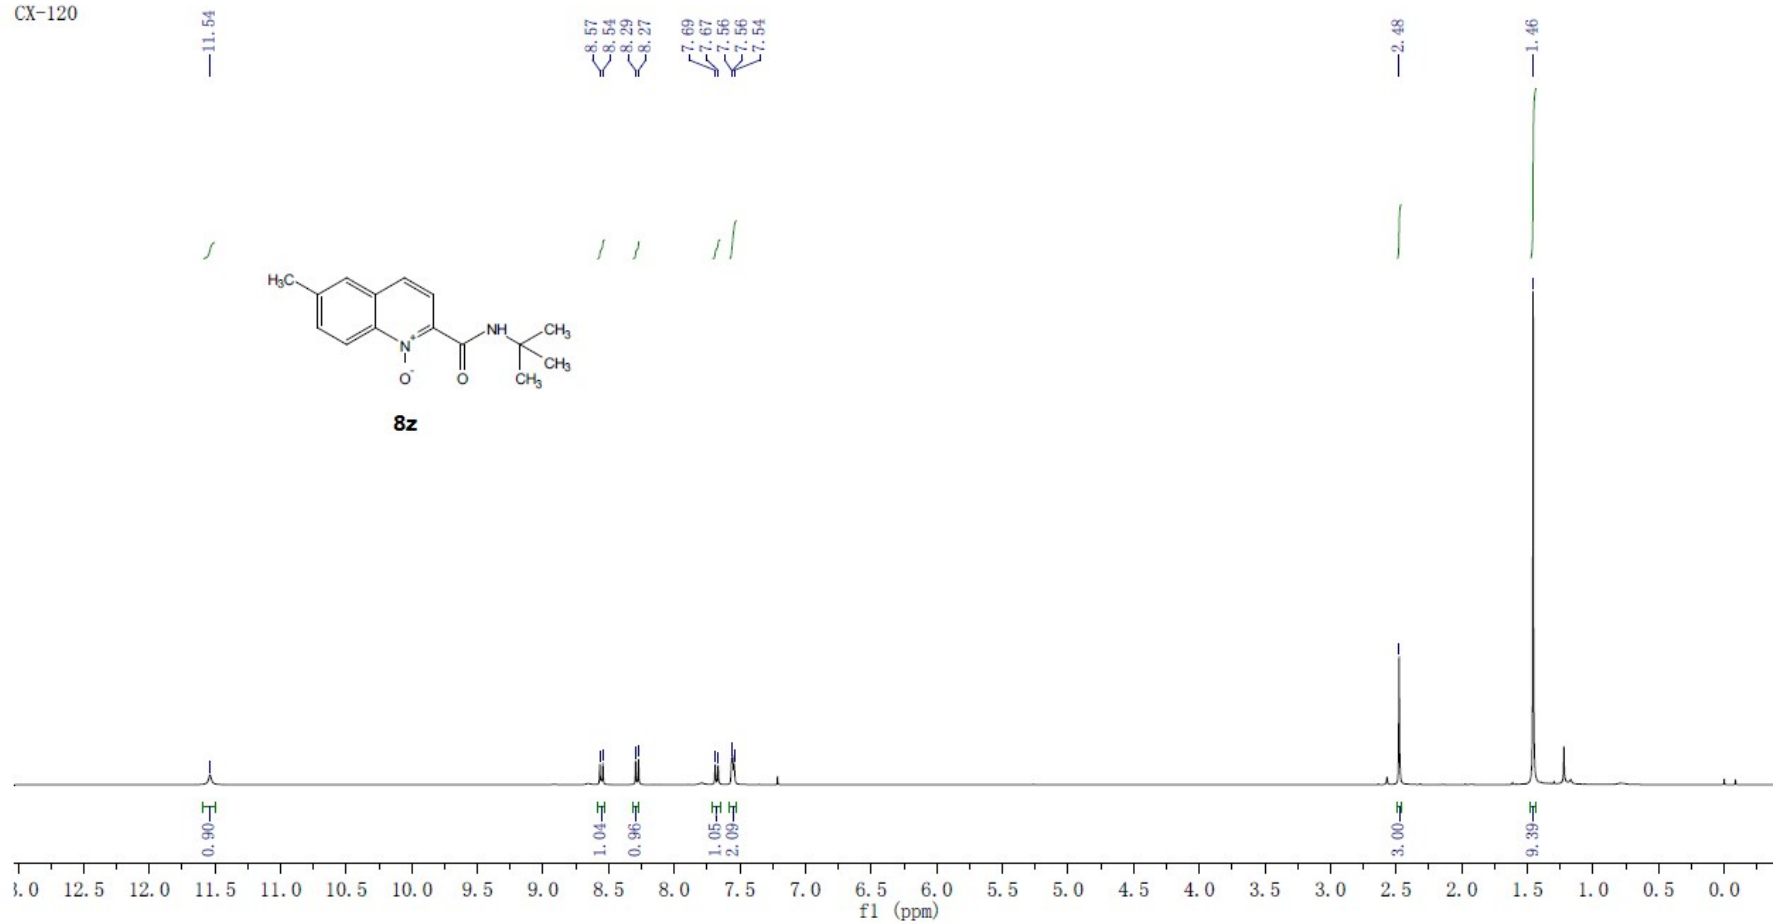

CX-120

159.10

140.17  
140.12  
137.78

133.33  
130.78  
127.14  
126.16  
122.47  
119.75

51.40

28.72

21.42

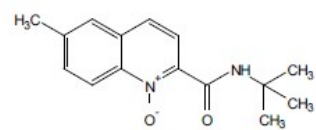

**8z**

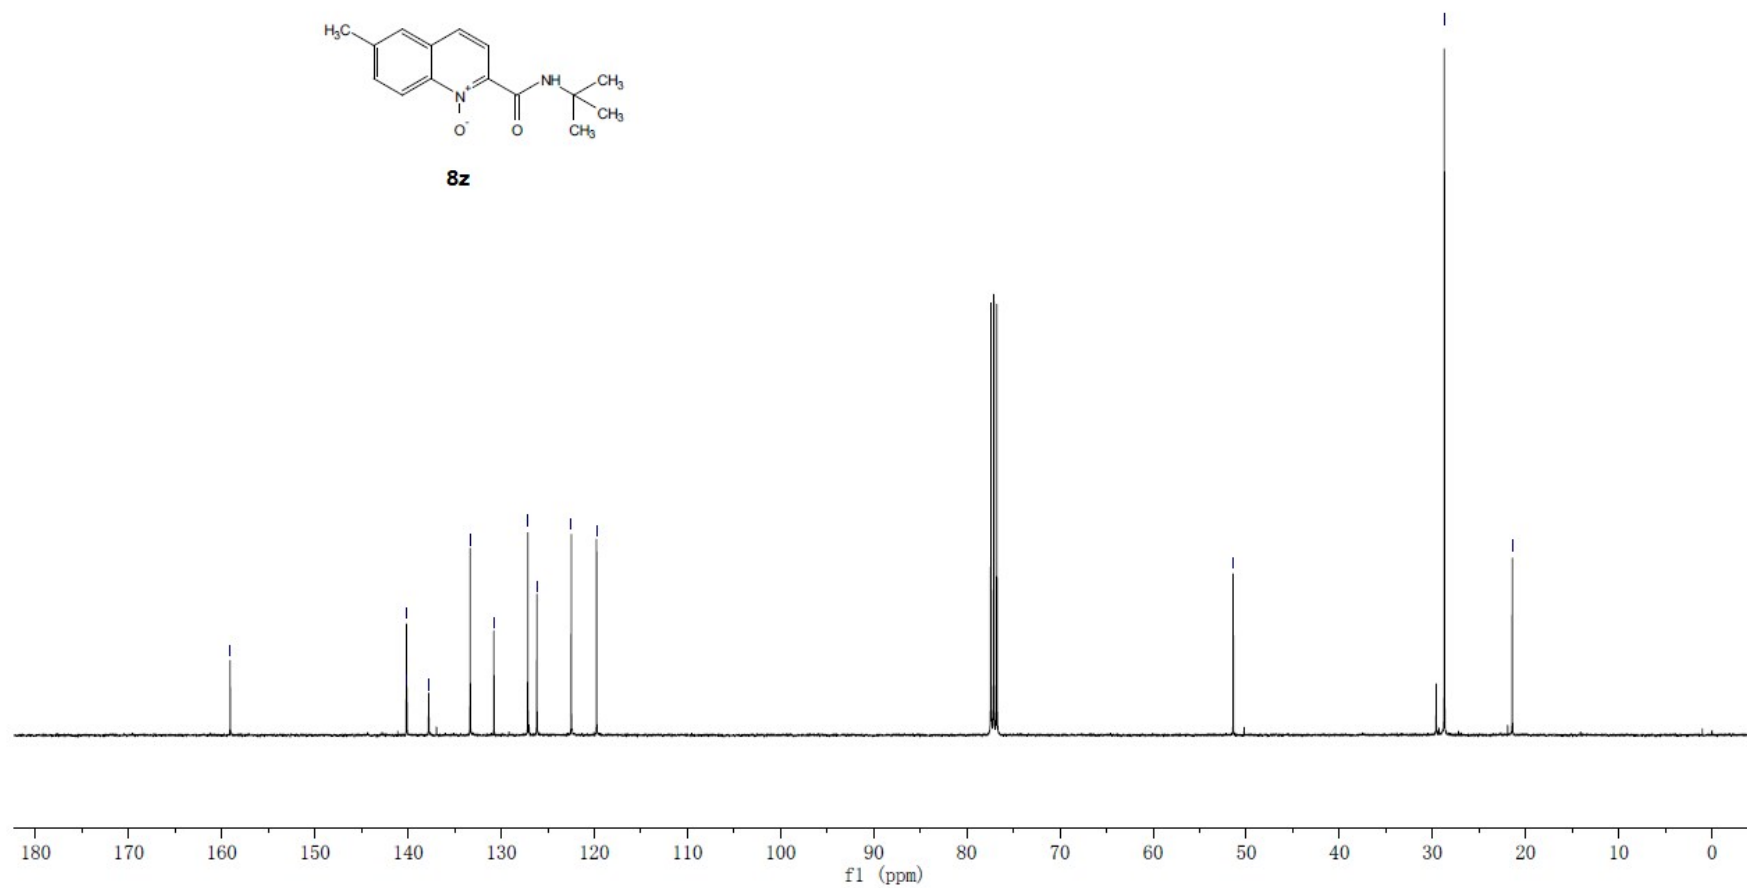

XLC-008

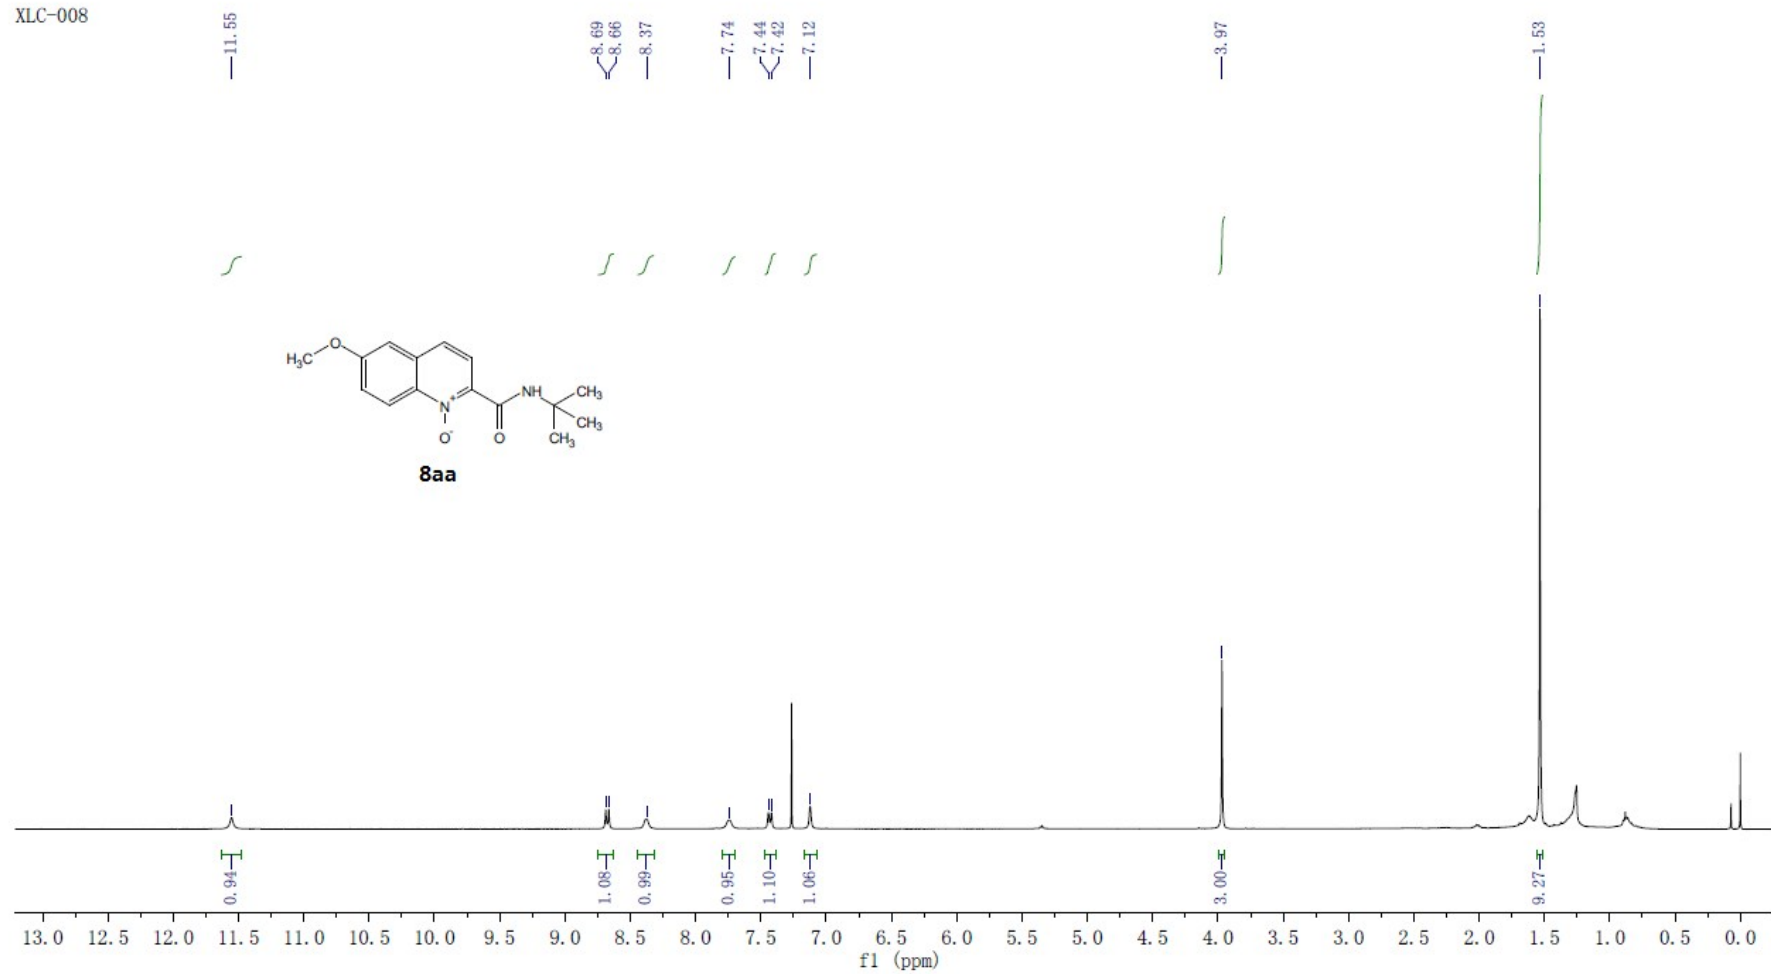



X17198

160.24  
159.18

137.15  
136.78

132.37

125.66  
123.50  
123.12  
121.74

105.87

55.84

51.40  
50.18

29.62  
28.74

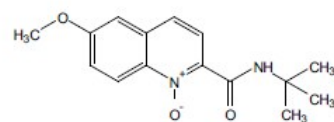

**8aa**

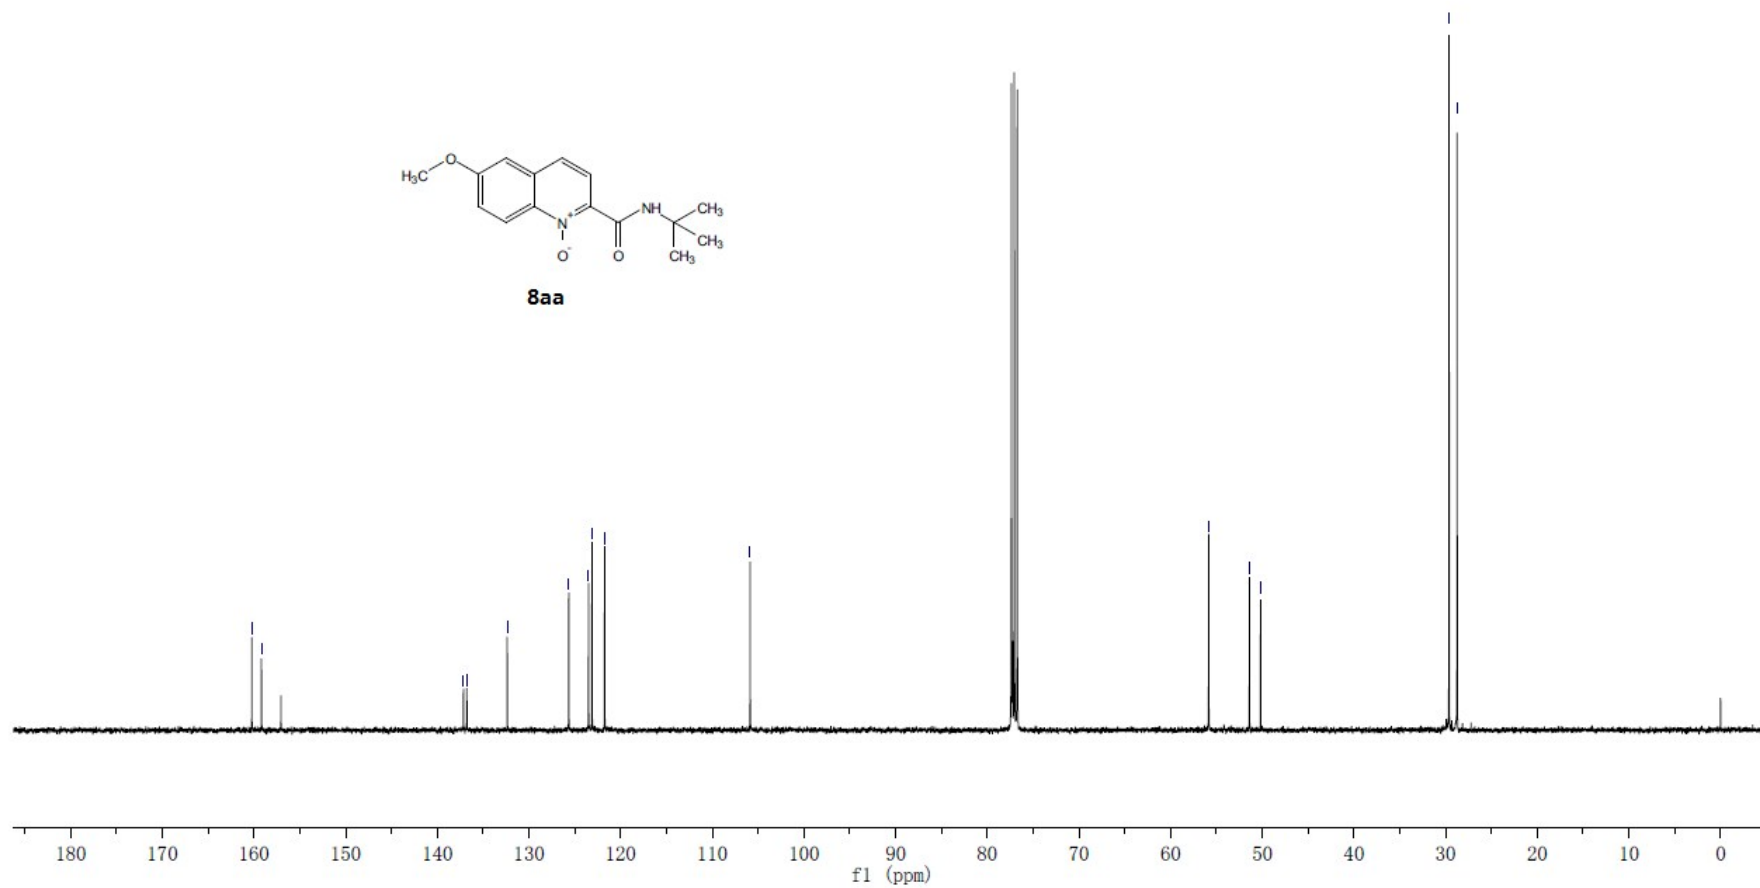

Xdd-152

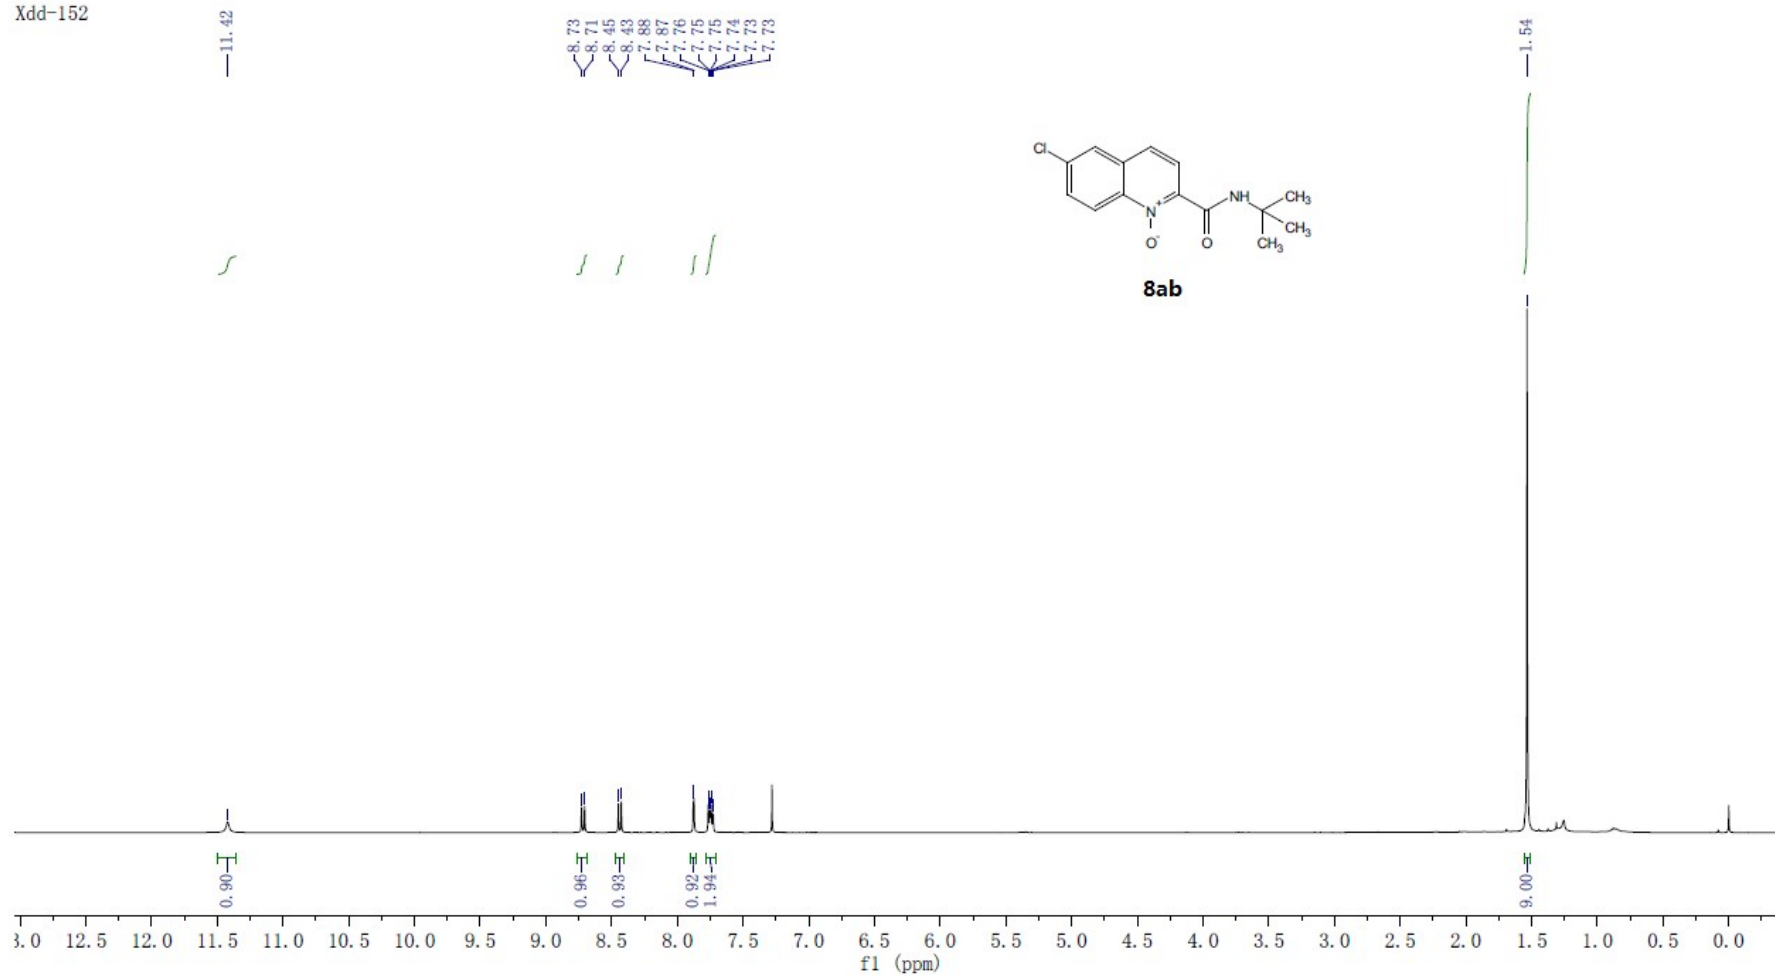

Xdd-152

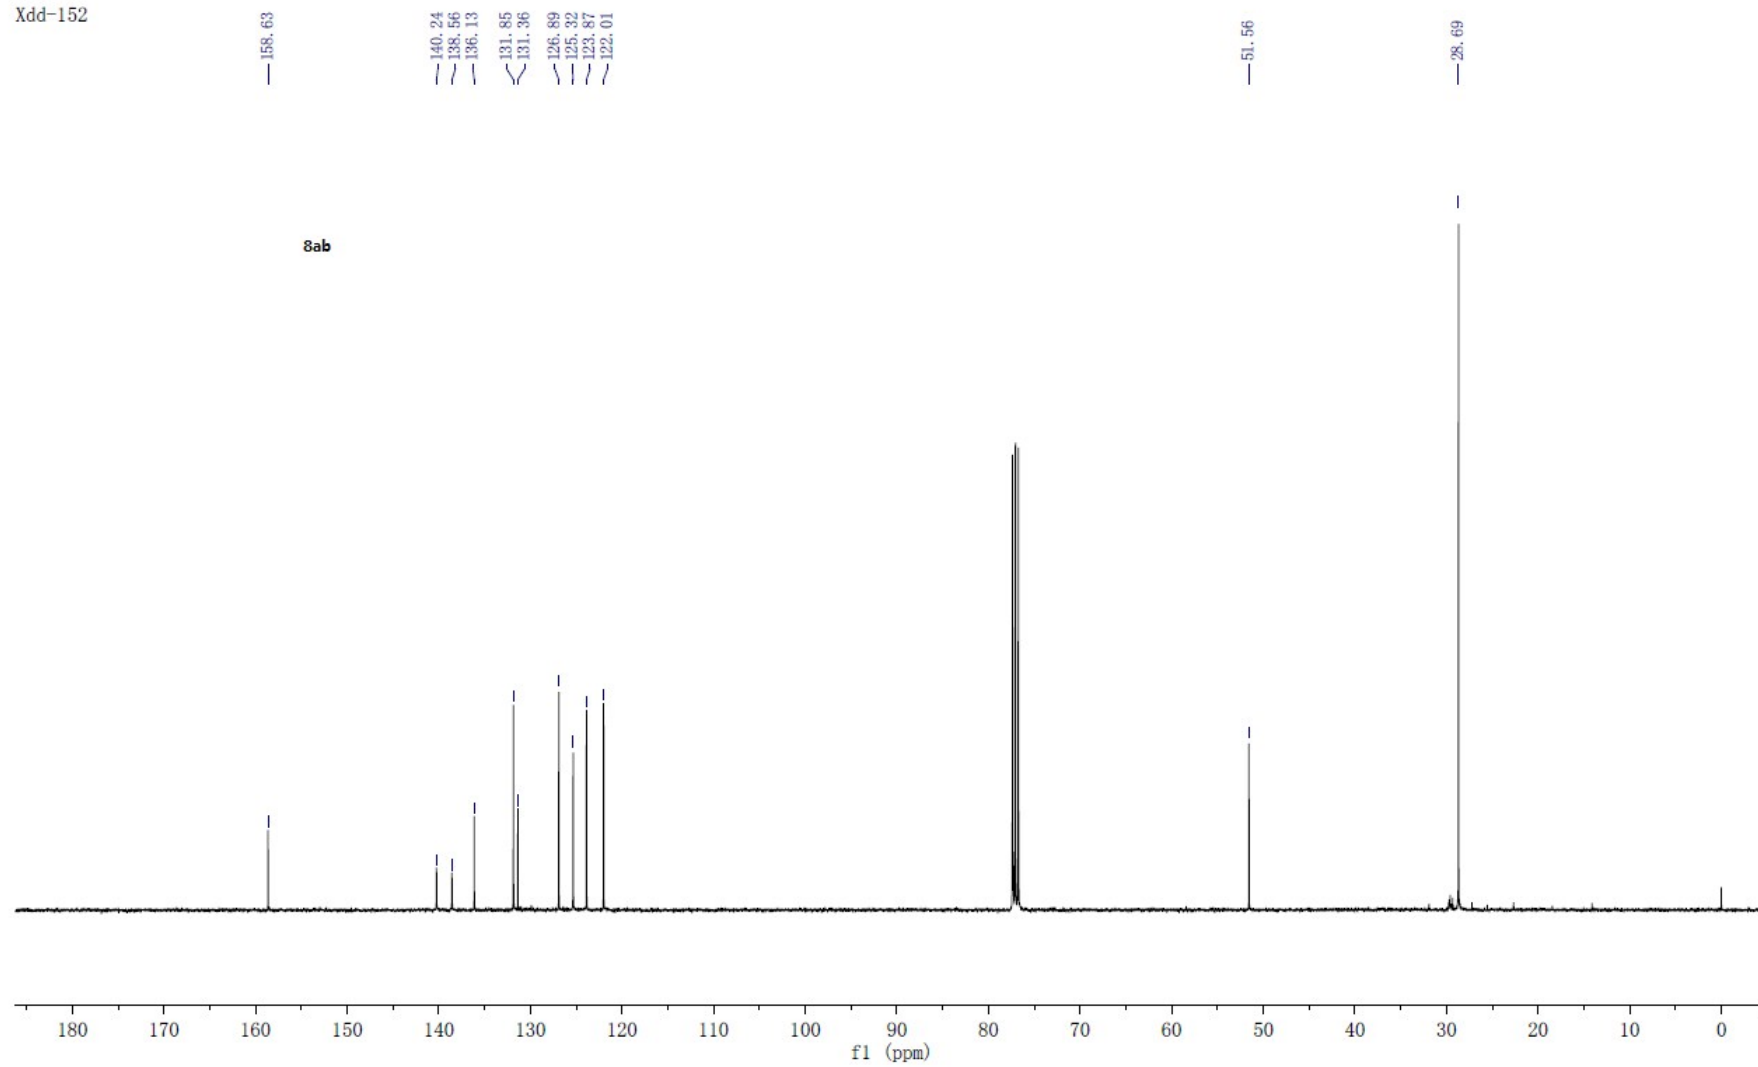

XaL-981

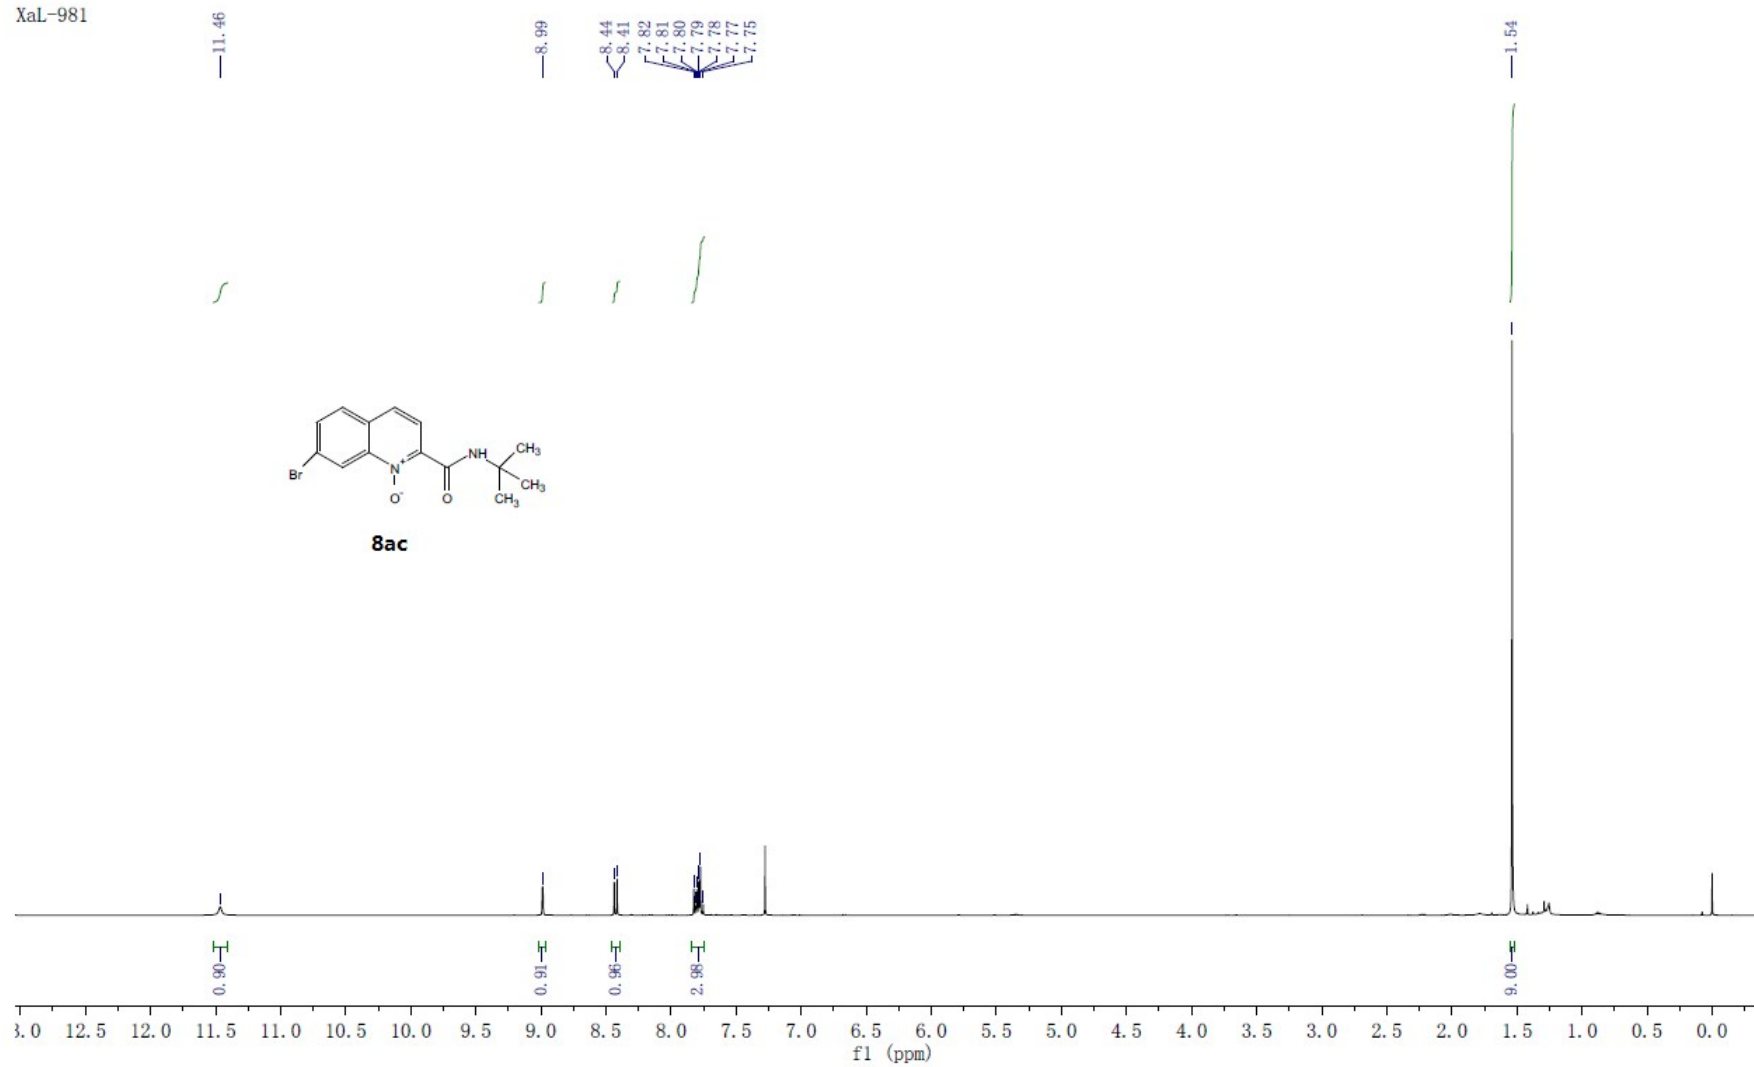

XaL-981

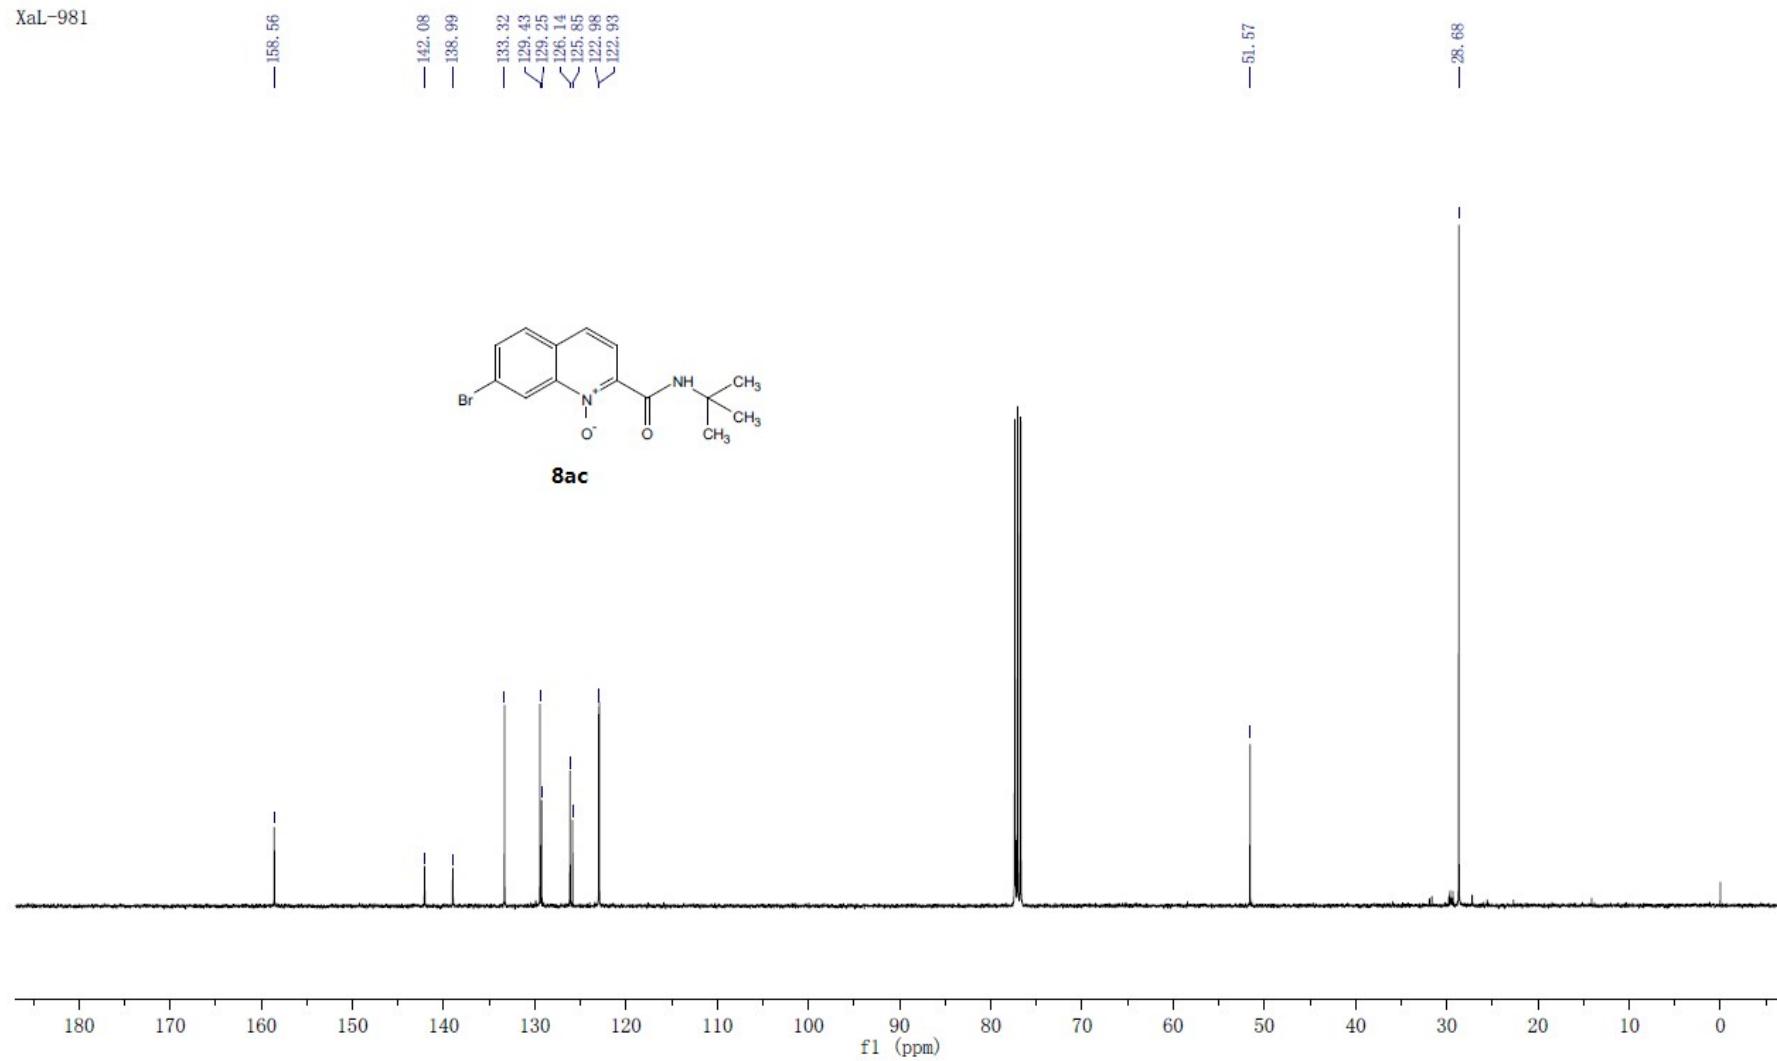

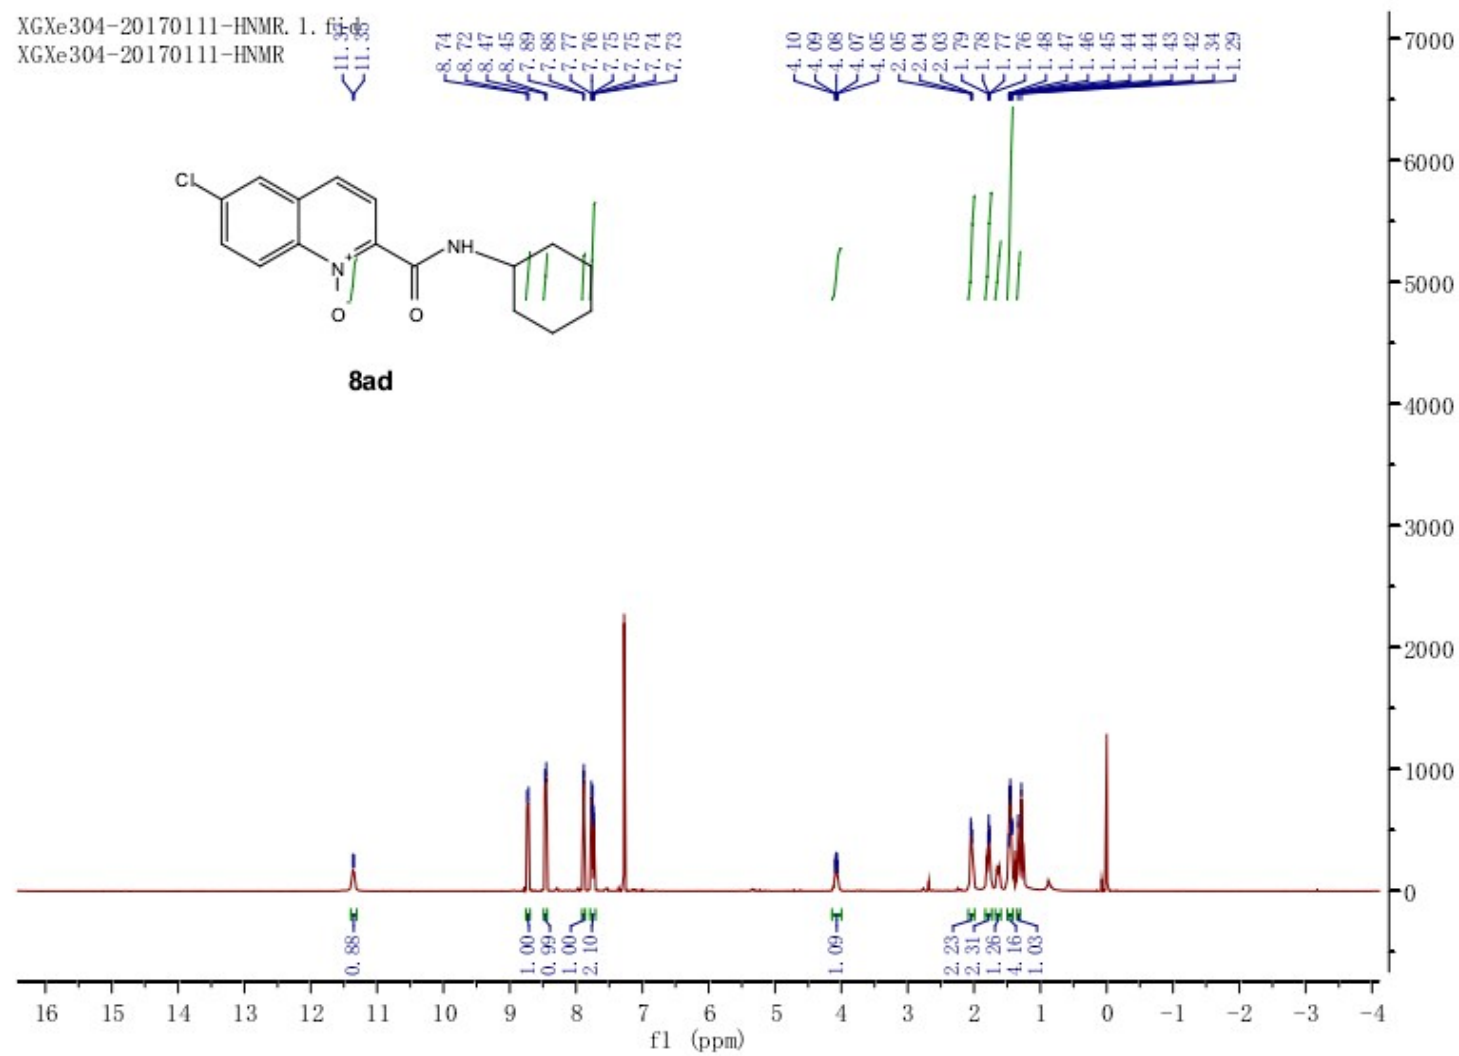

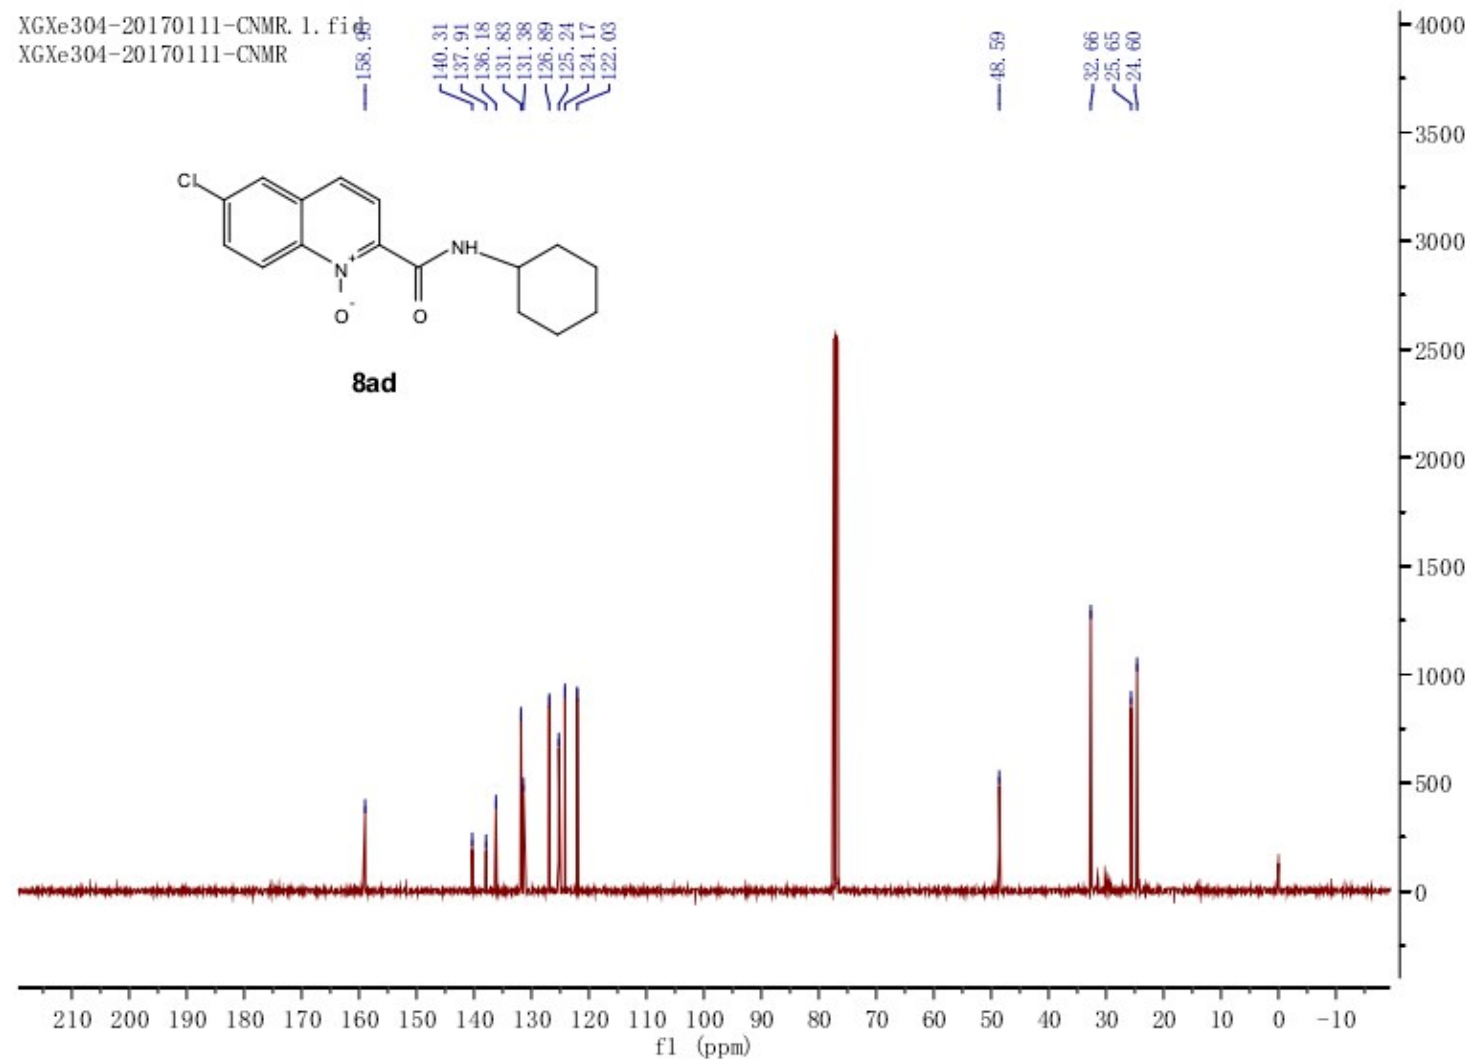

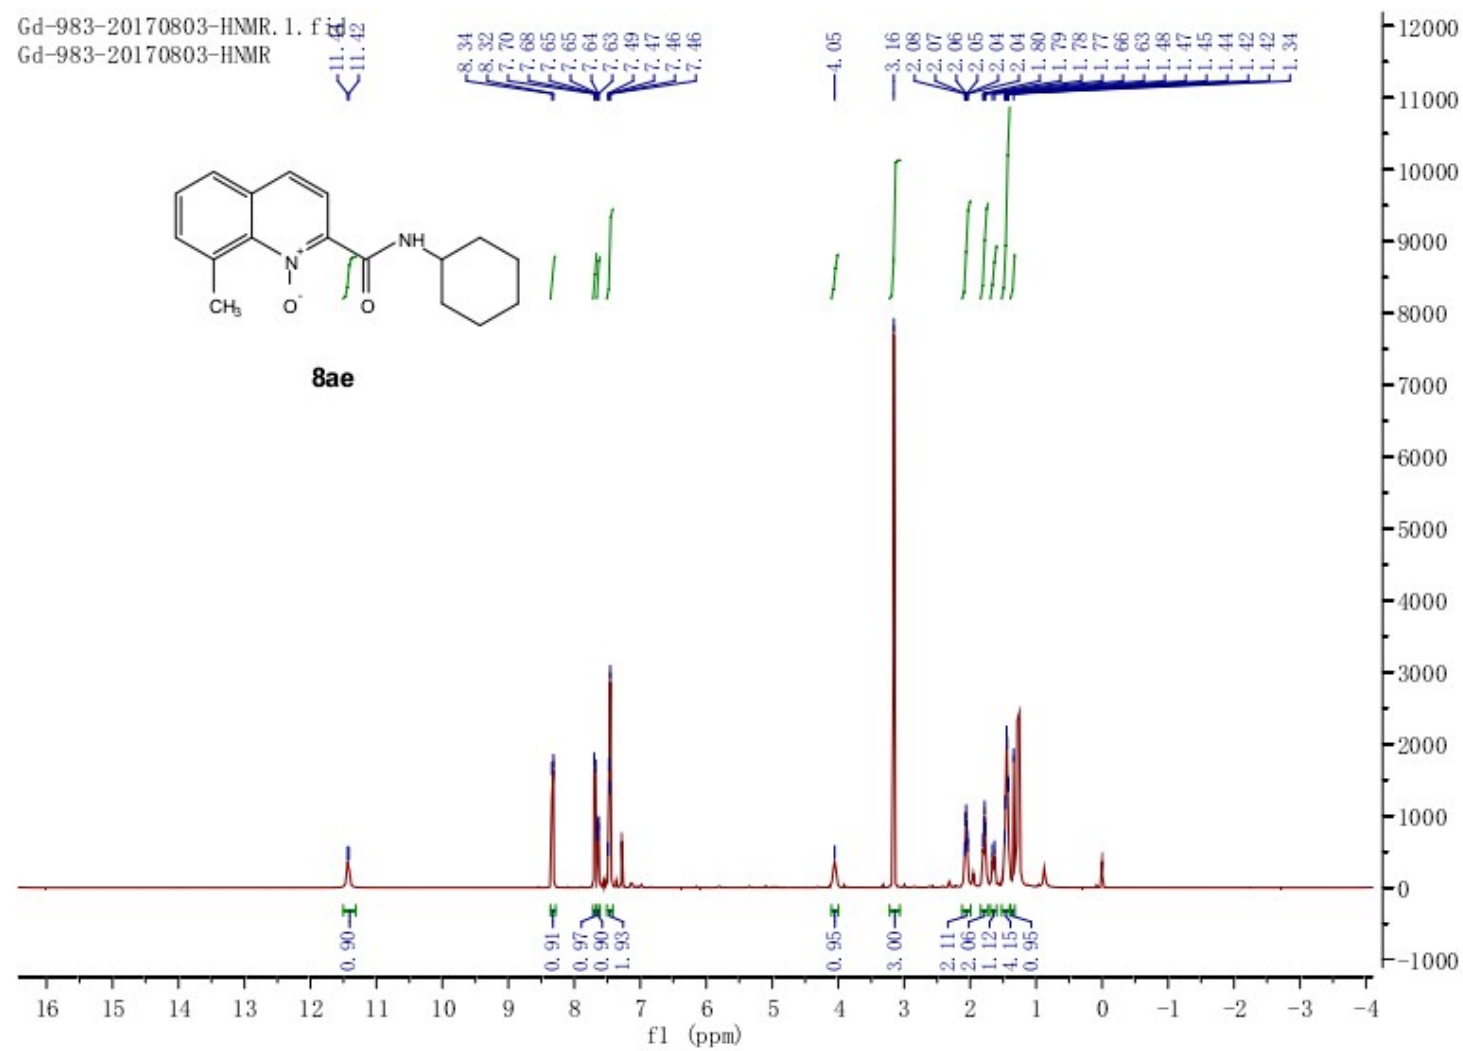



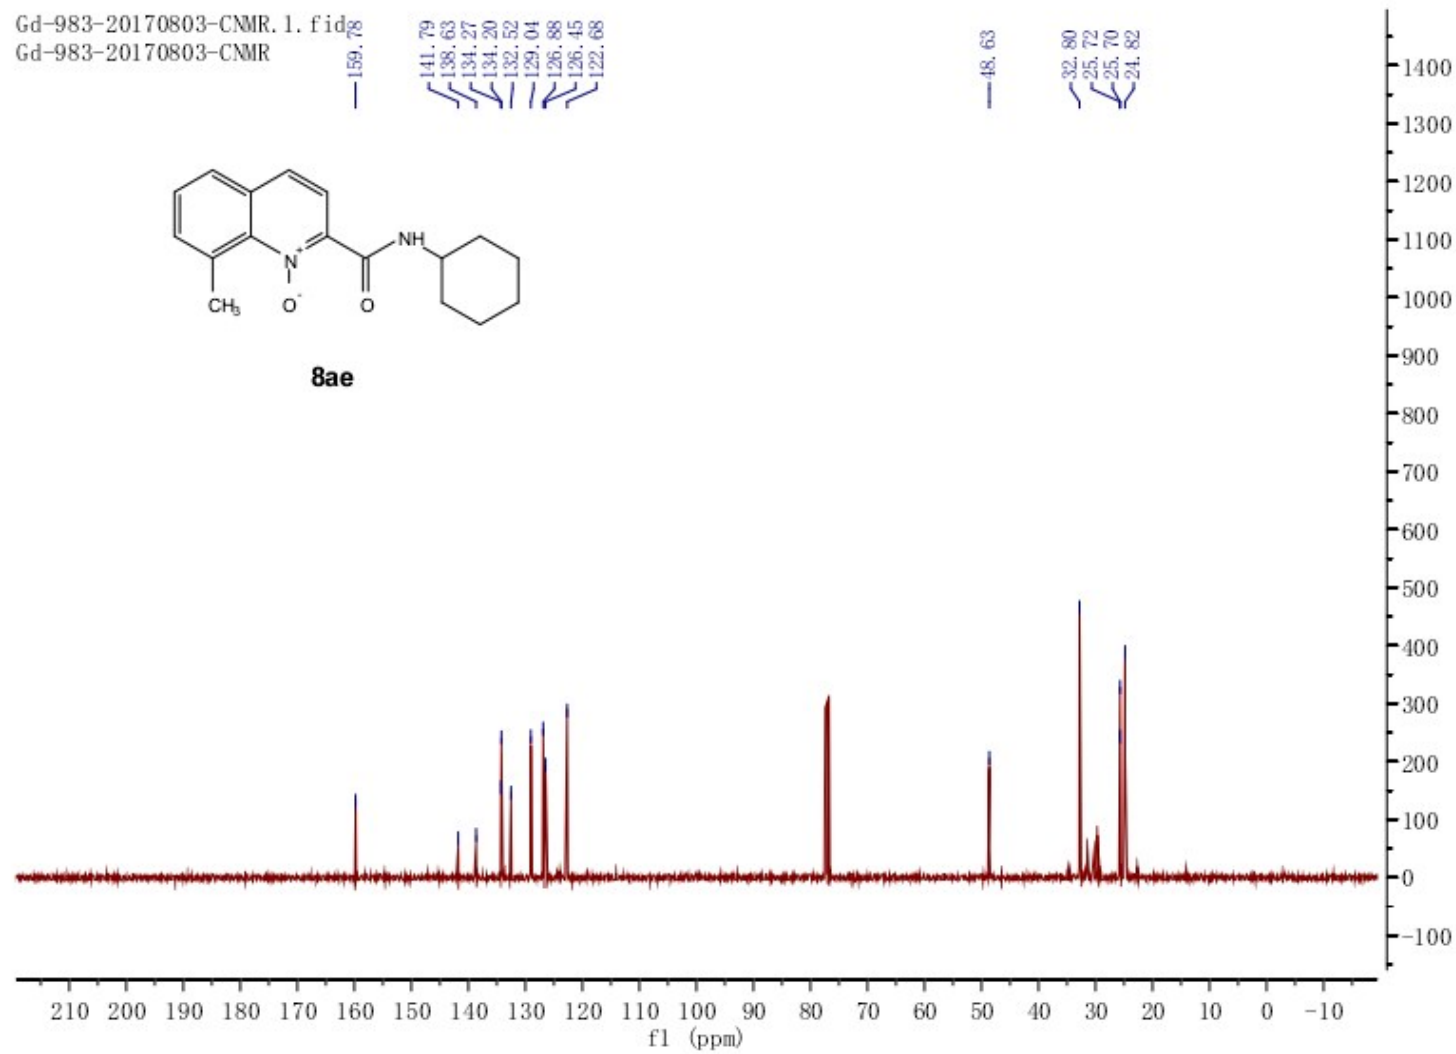

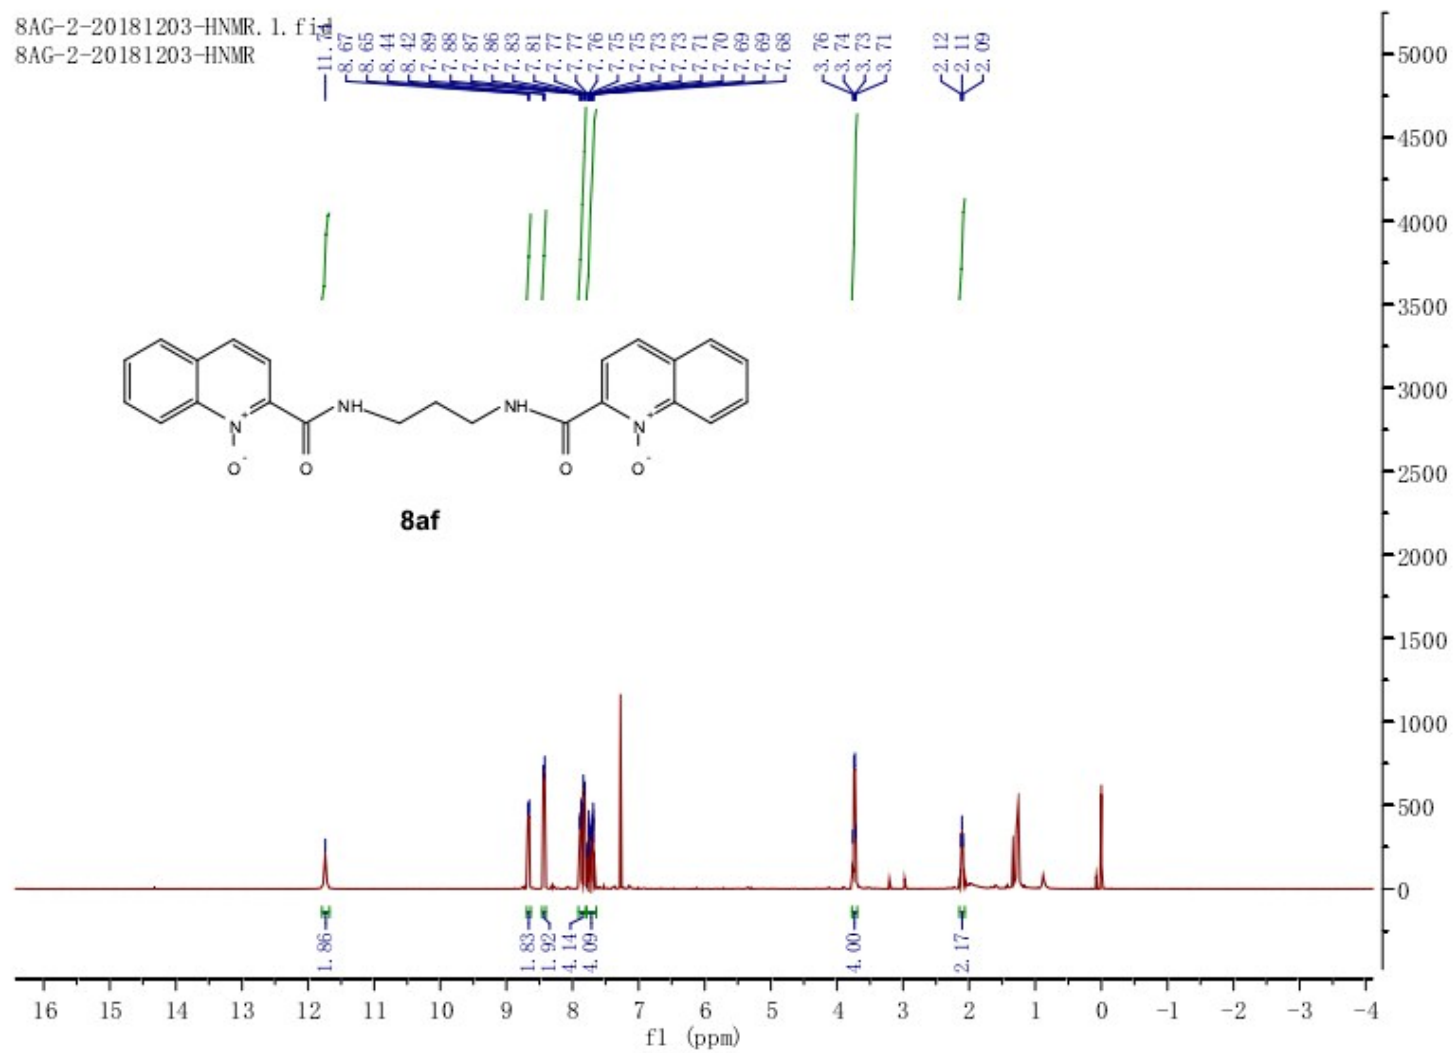

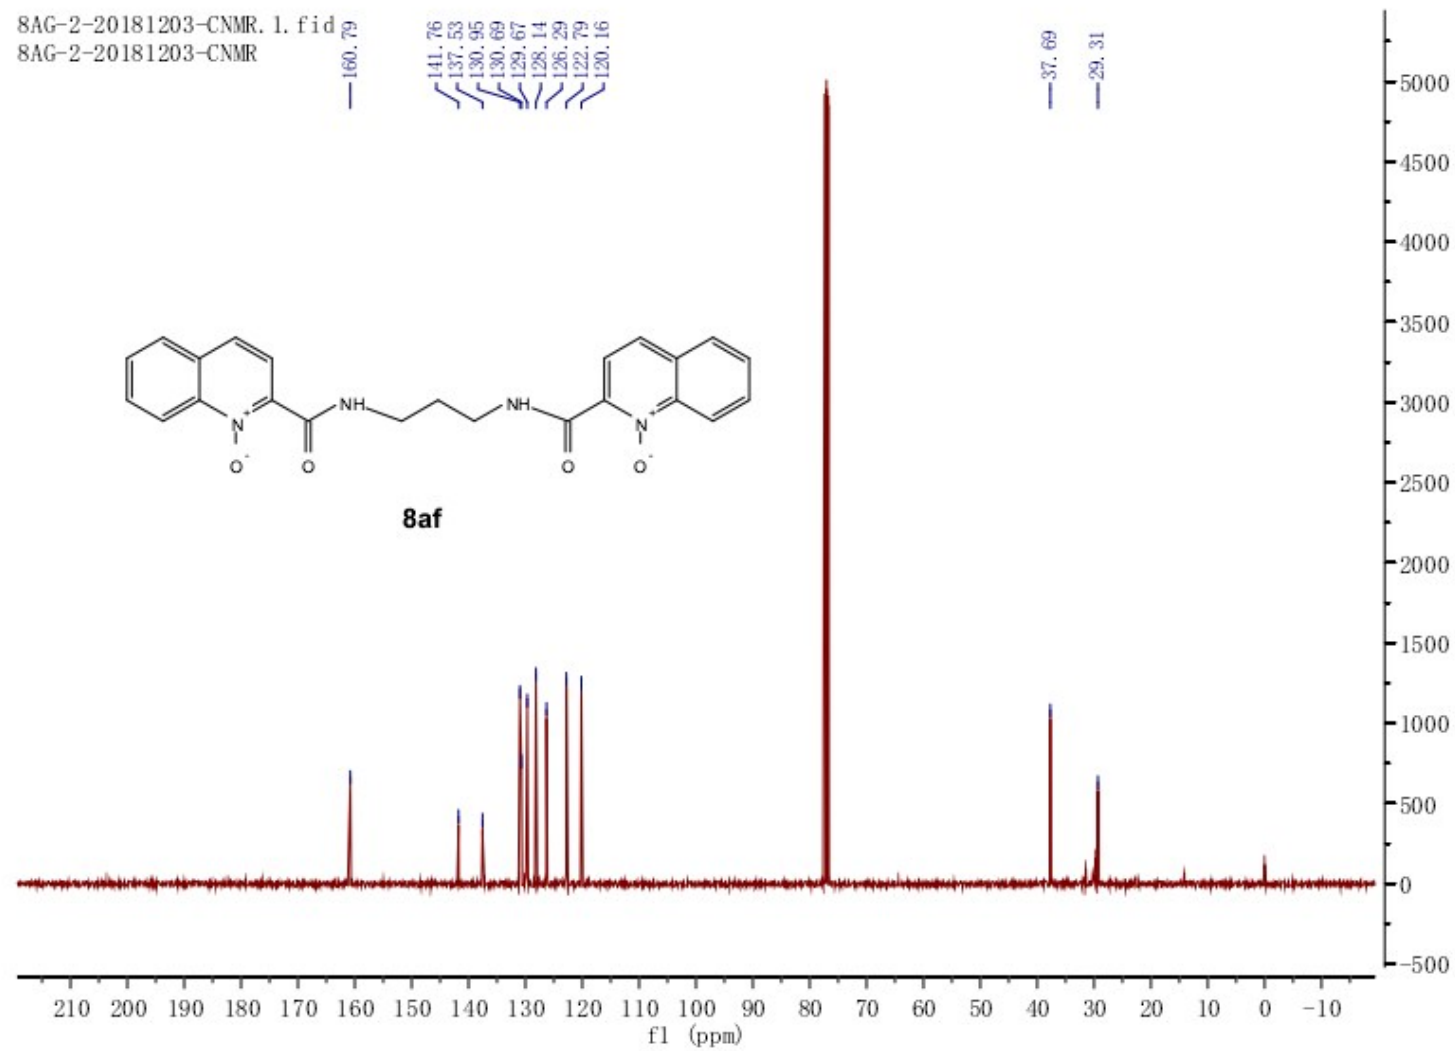

xgx-183

7.79  
7.77  
7.64  
7.62  
7.51  
7.49  
7.46  
7.46  
7.44  
7.42  
7.42  
7.12  
7.10  
7.09  
6.82  
6.80

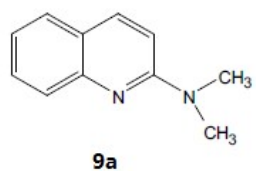

3.15

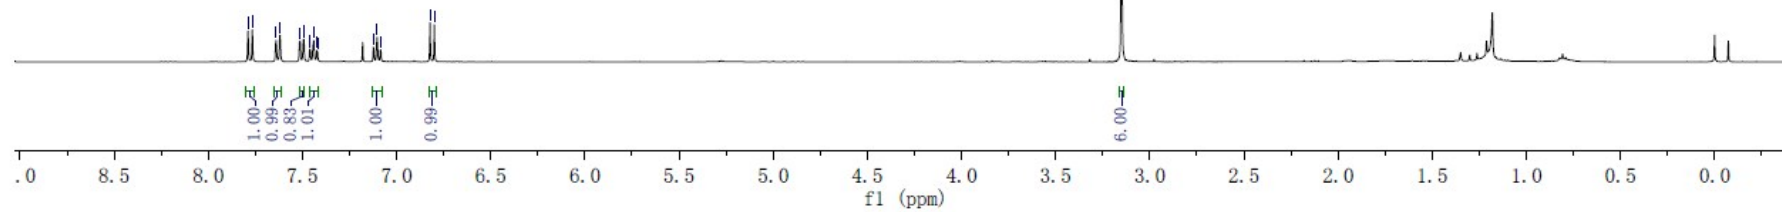

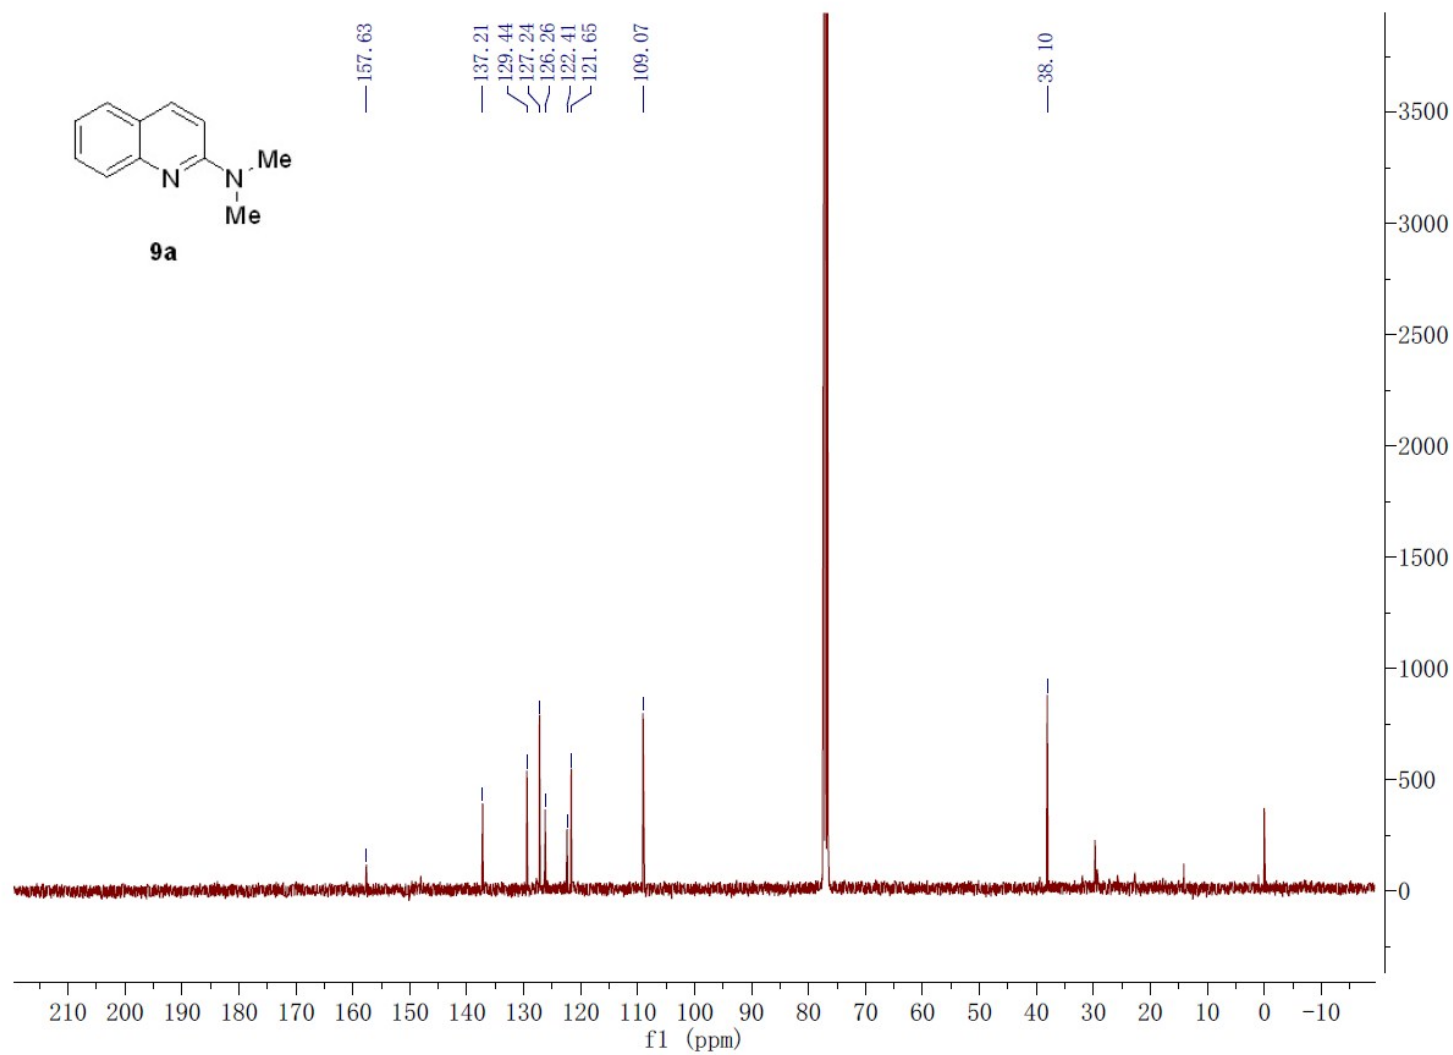

XGXf-250

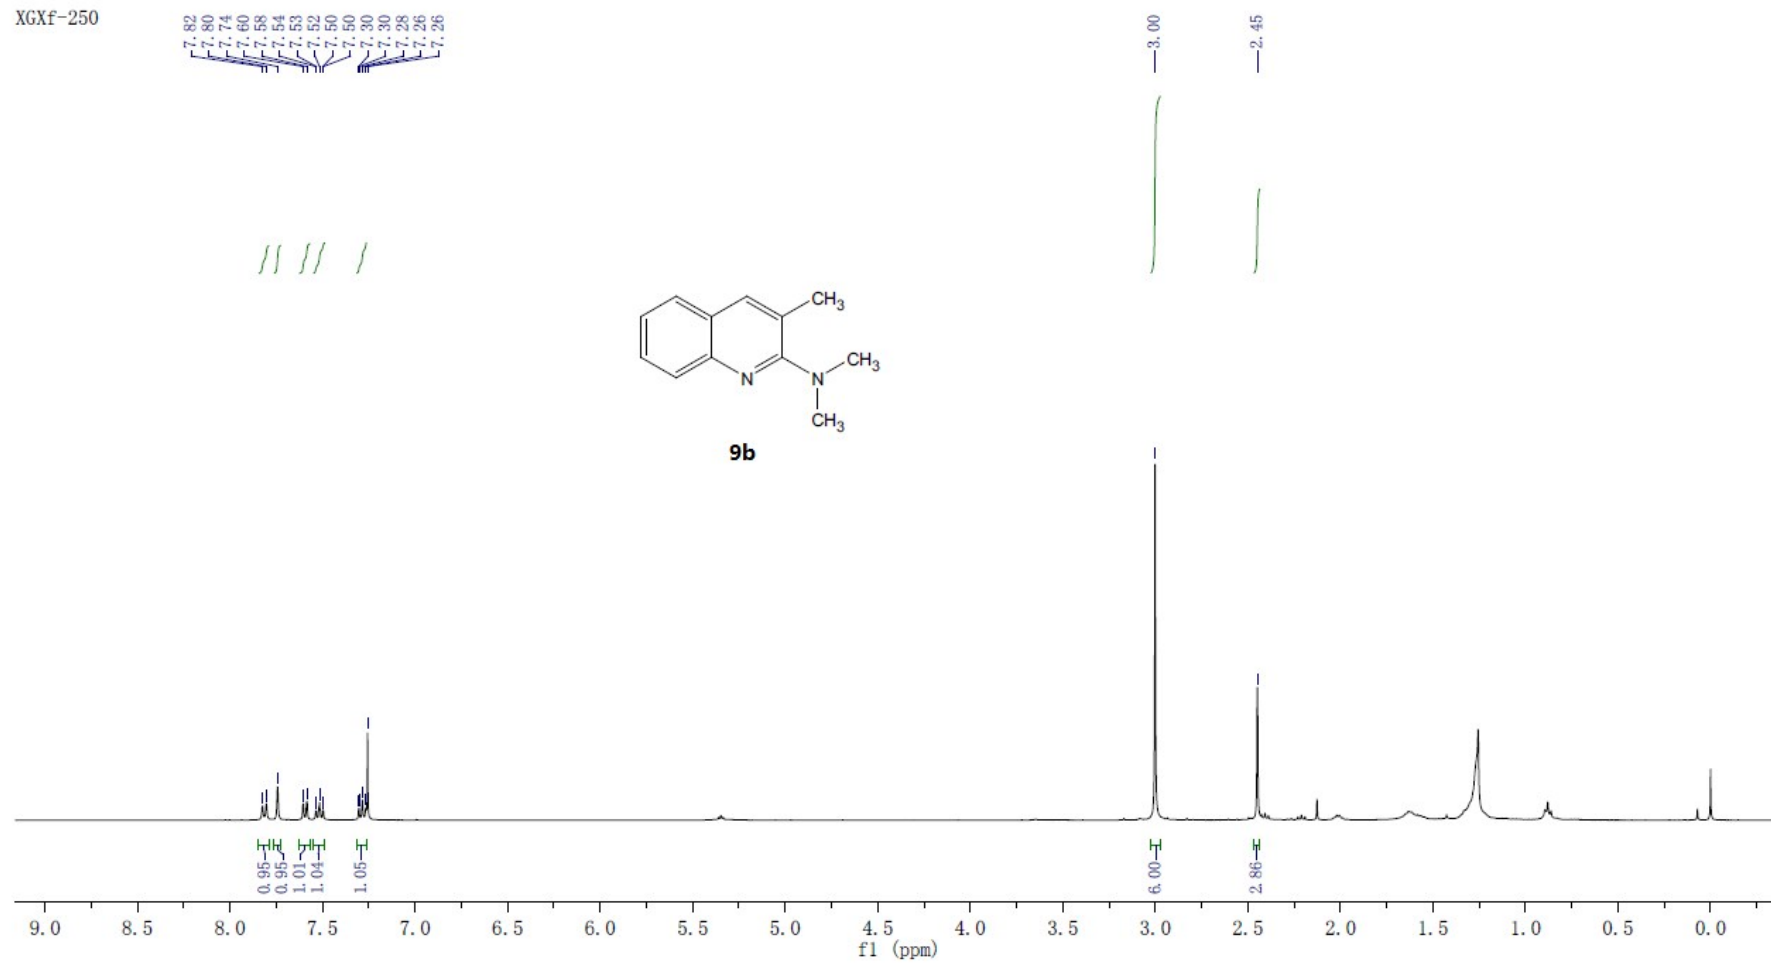

XGX-3JF-20171031-CNMR  
XGX-3JF-20171031-CNMR

161.89  
145.94  
138.07  
128.31  
127.08  
126.33  
125.25  
124.61  
123.54  
41.65  
19.90

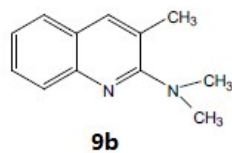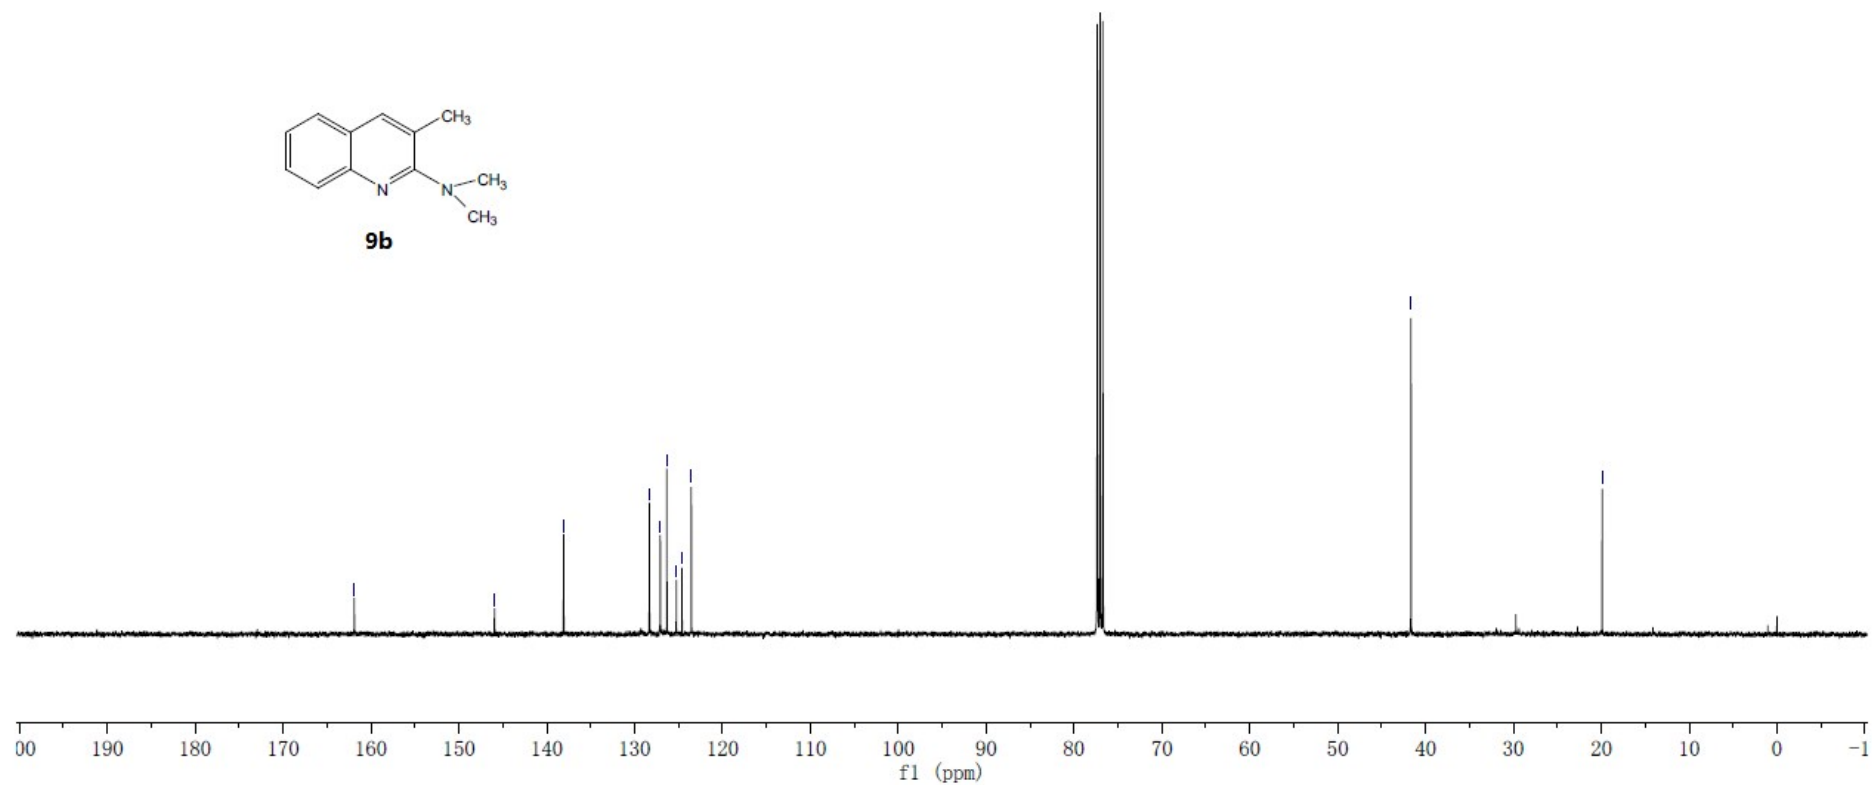

DT-11.26-3-20181130-HNMR. 1. fid

DT-11.26-3-20181130-HNMR

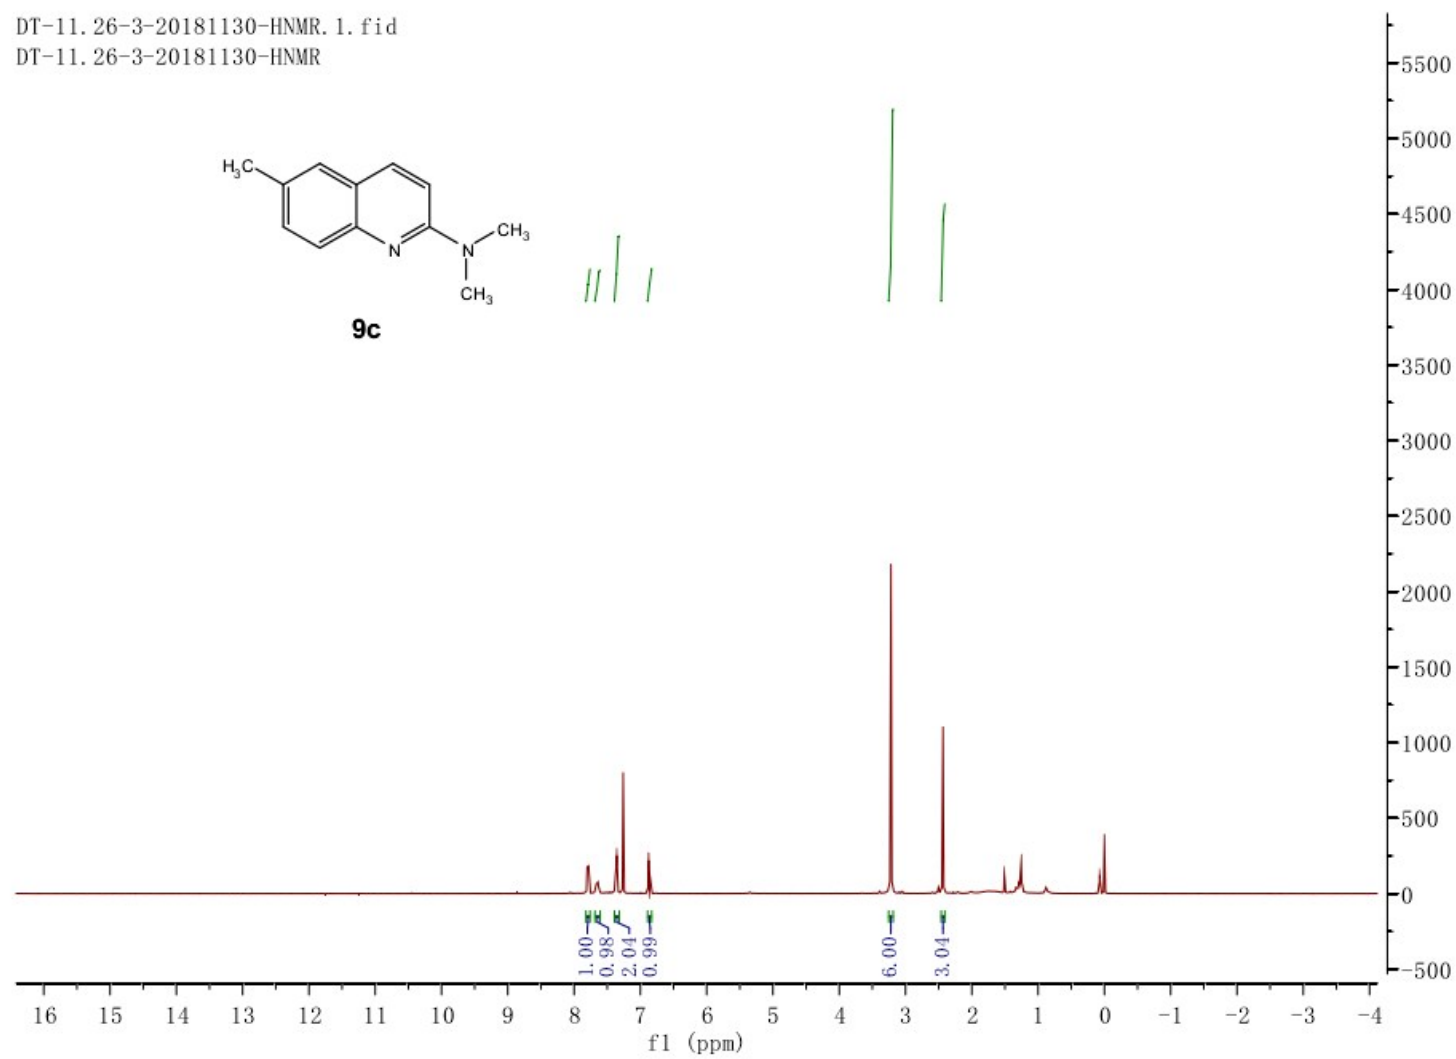



DT-11.26-3-20181130-CNMR. 1.  
DT-11.26-3-20181130-CNMR

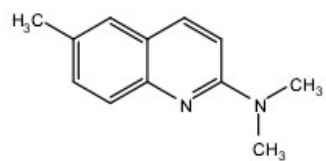

**9c**

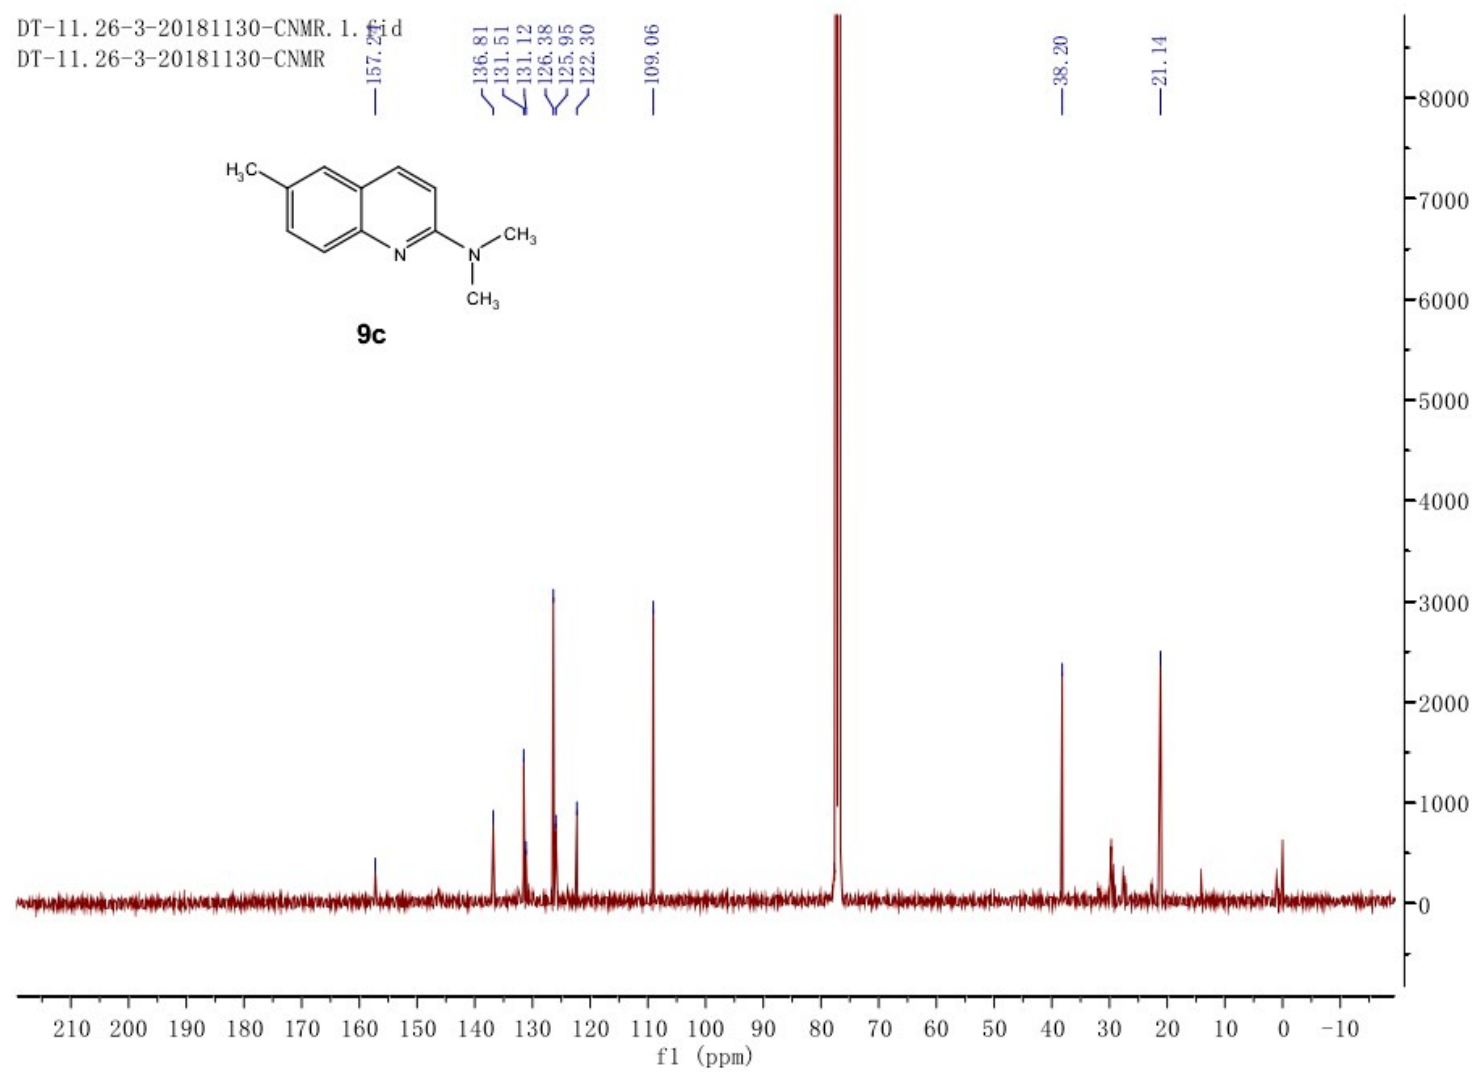

G-425-20170803-HNMR. 1. fid

G-425-20170803-HNMR

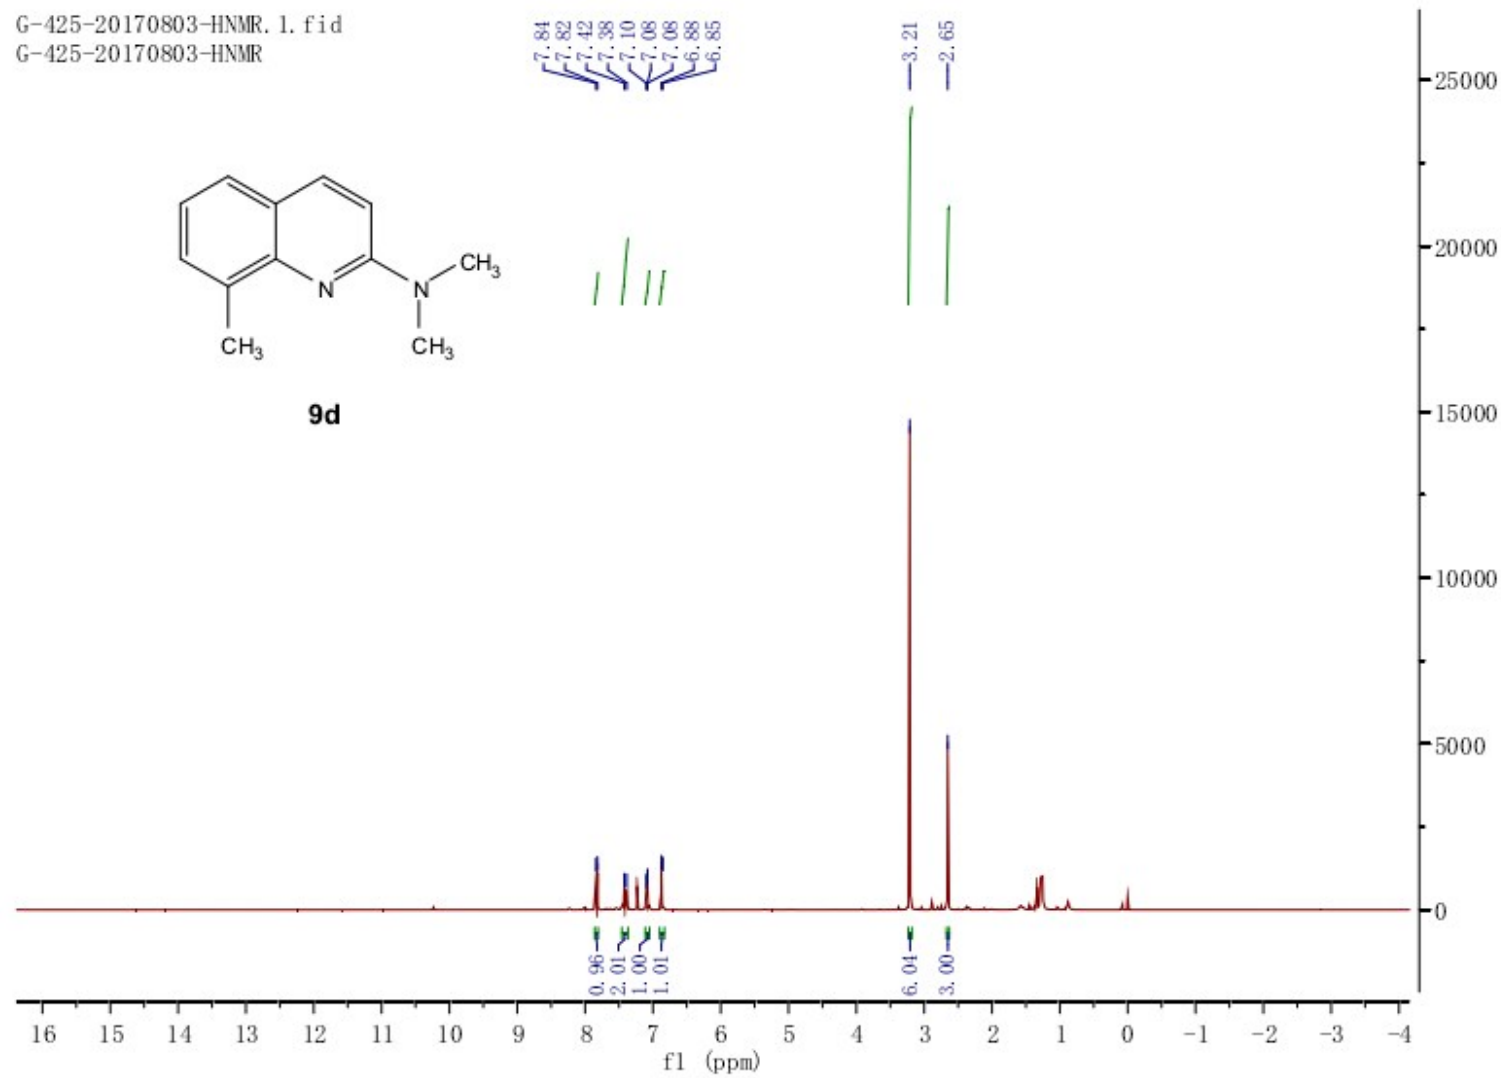

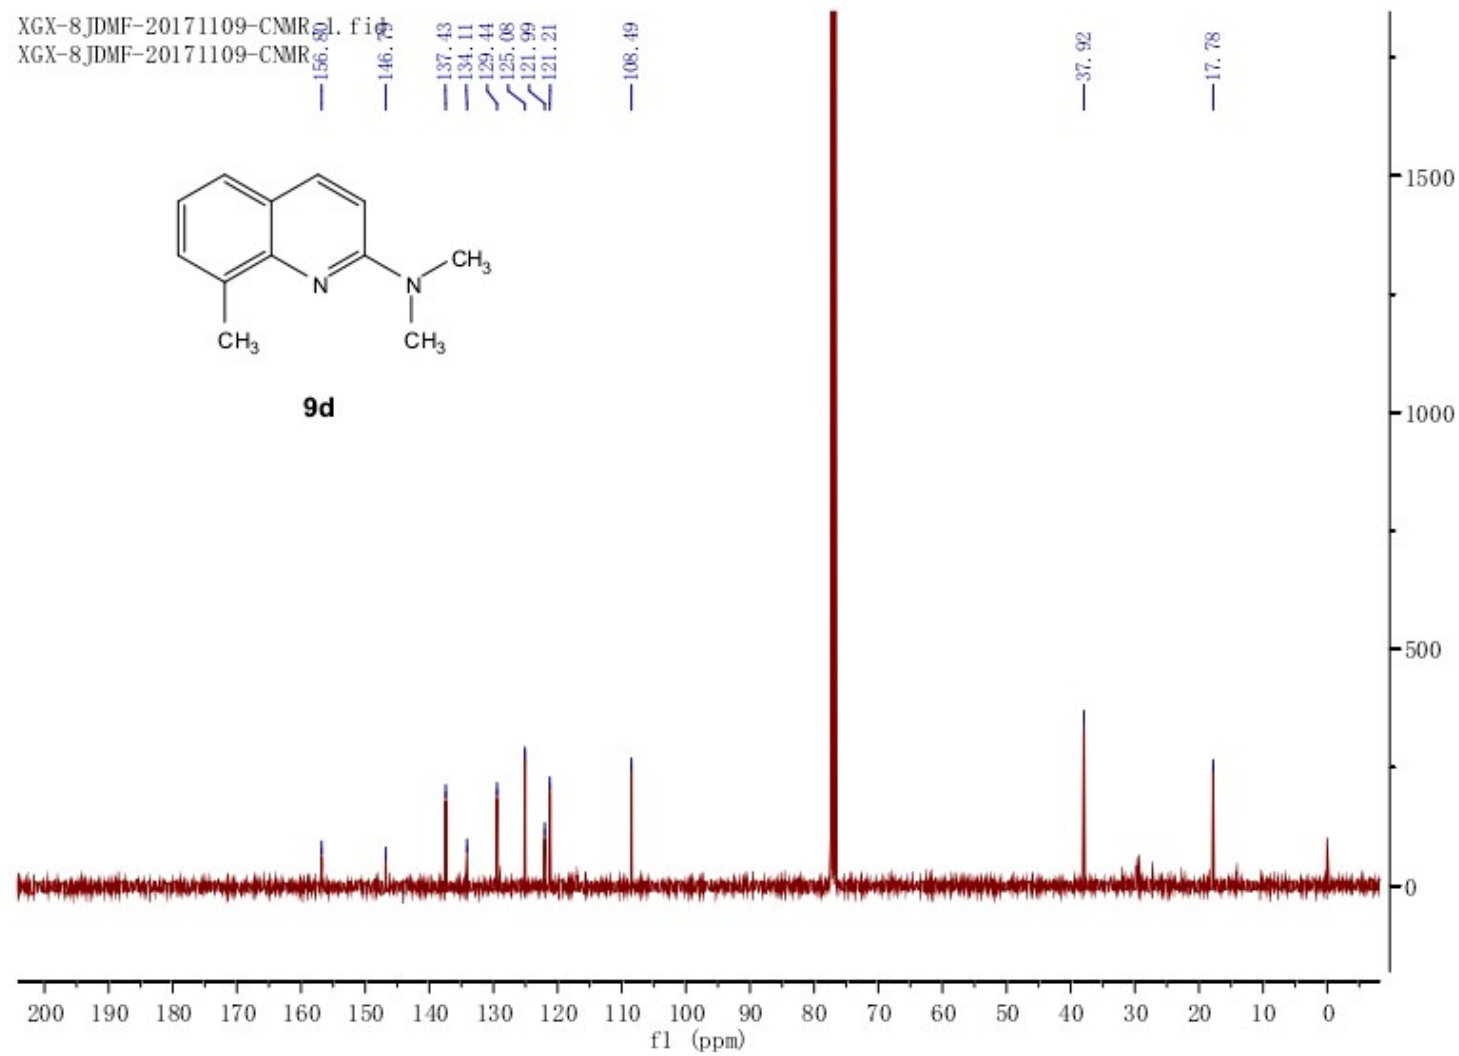

DT-11.26-4-20181129-HNMR.1.fid  
DT-11.26-4-20181129-HNMR

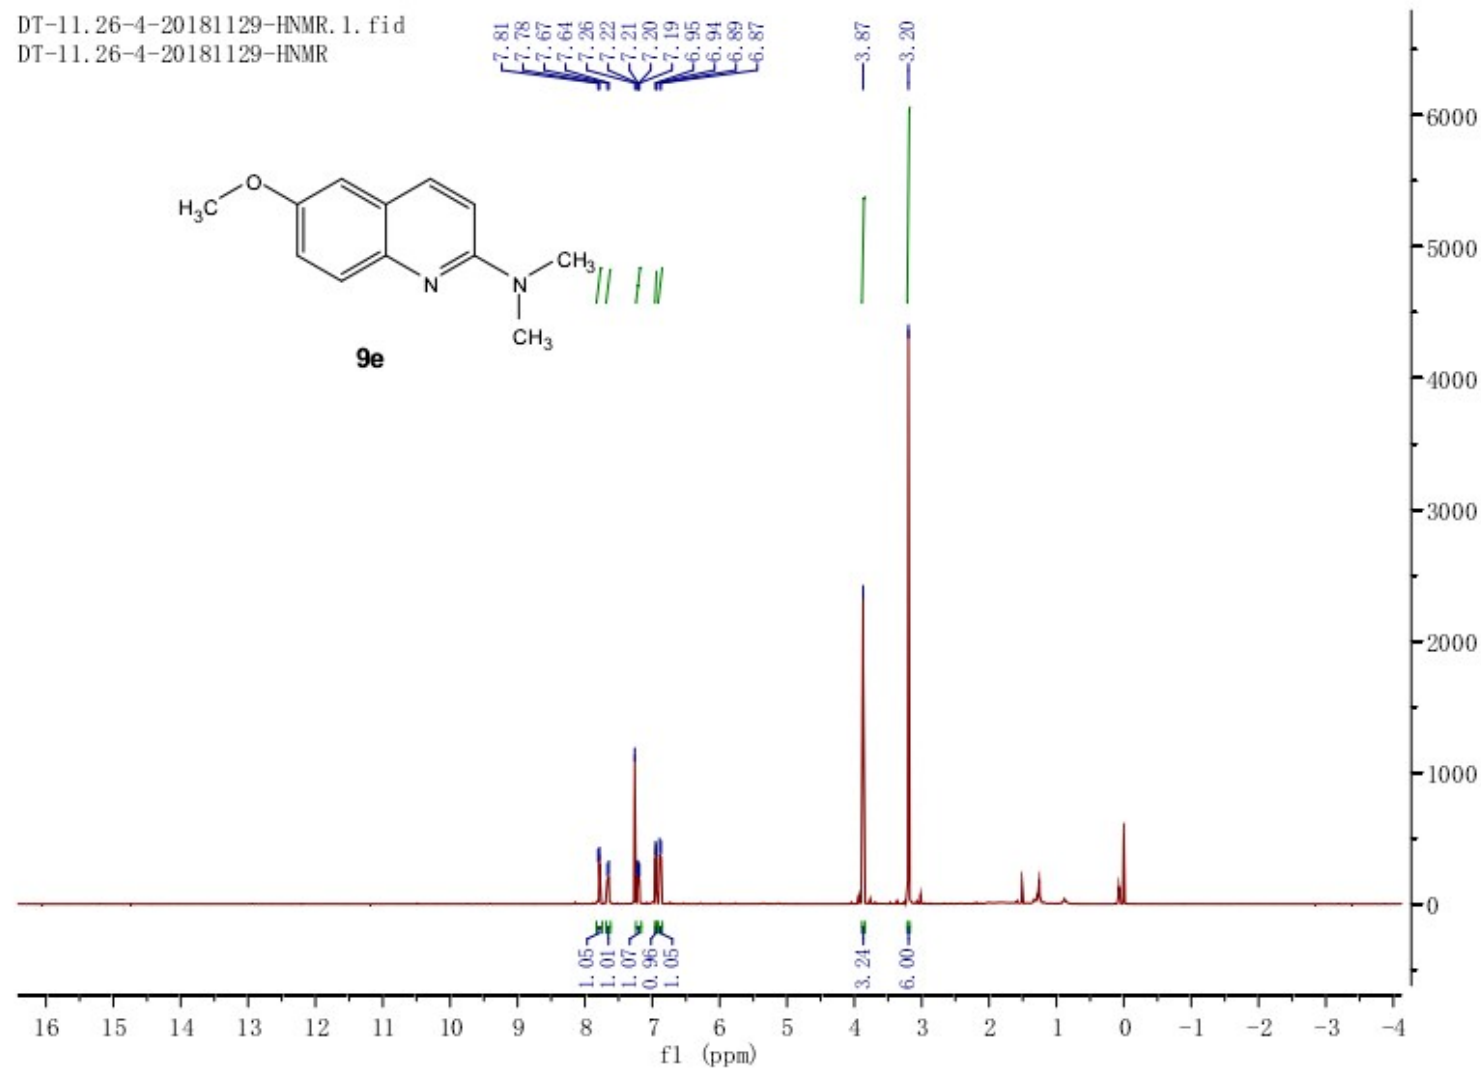

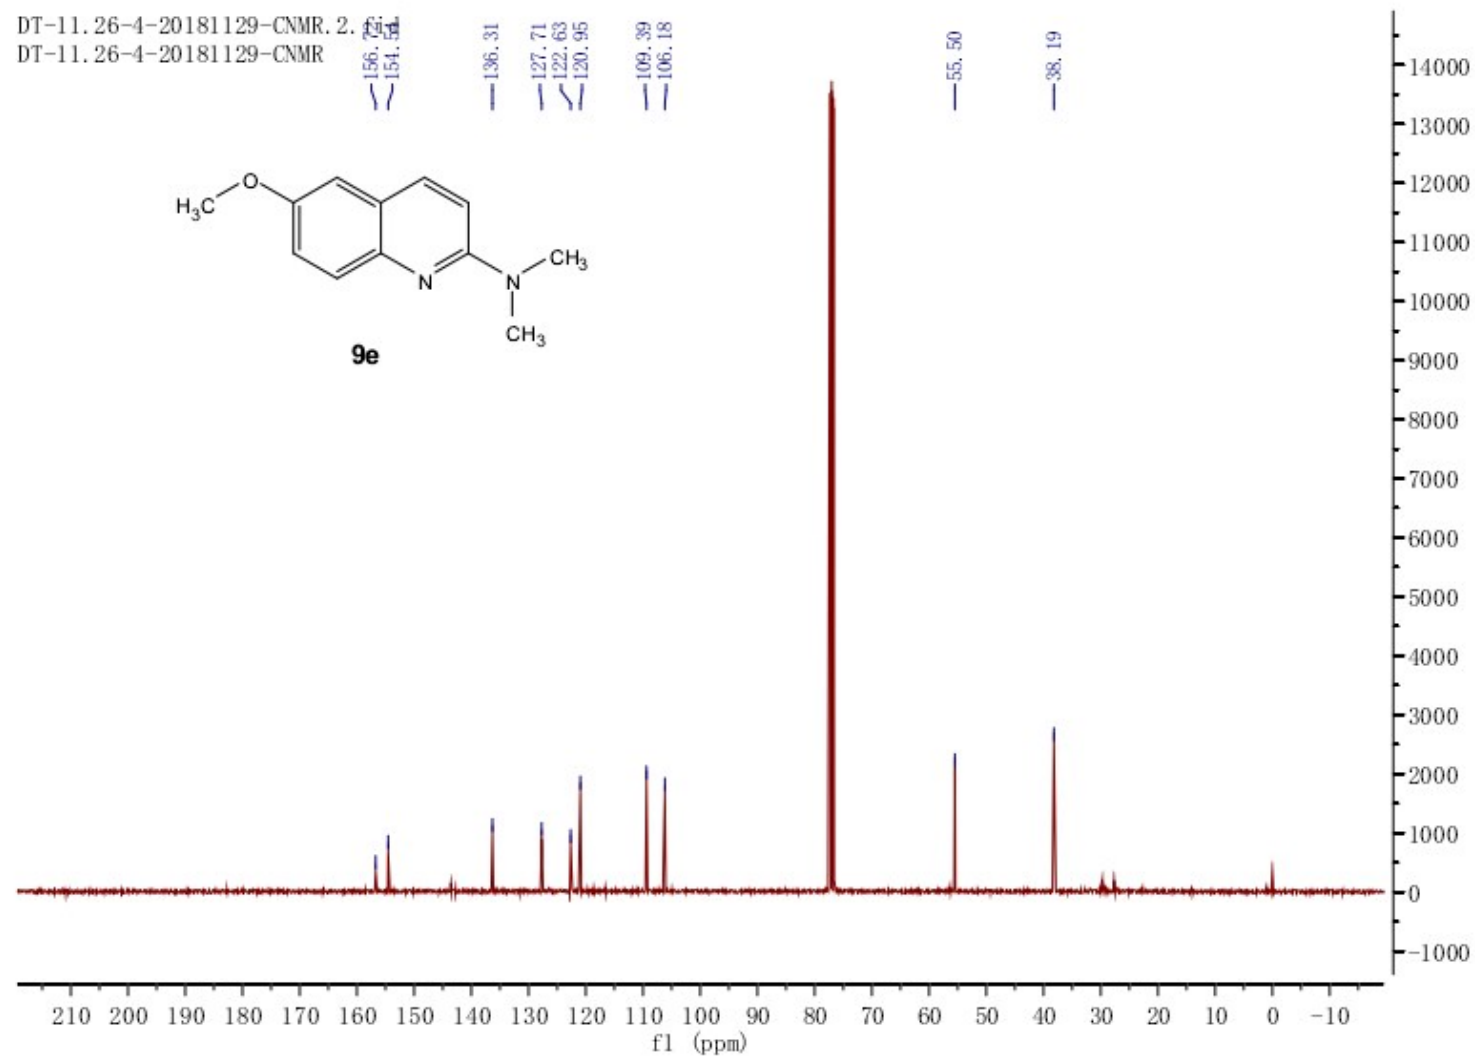

XGX-206-20181127-HNMR. 1. fid  
XGX-206-20181127-HNMR

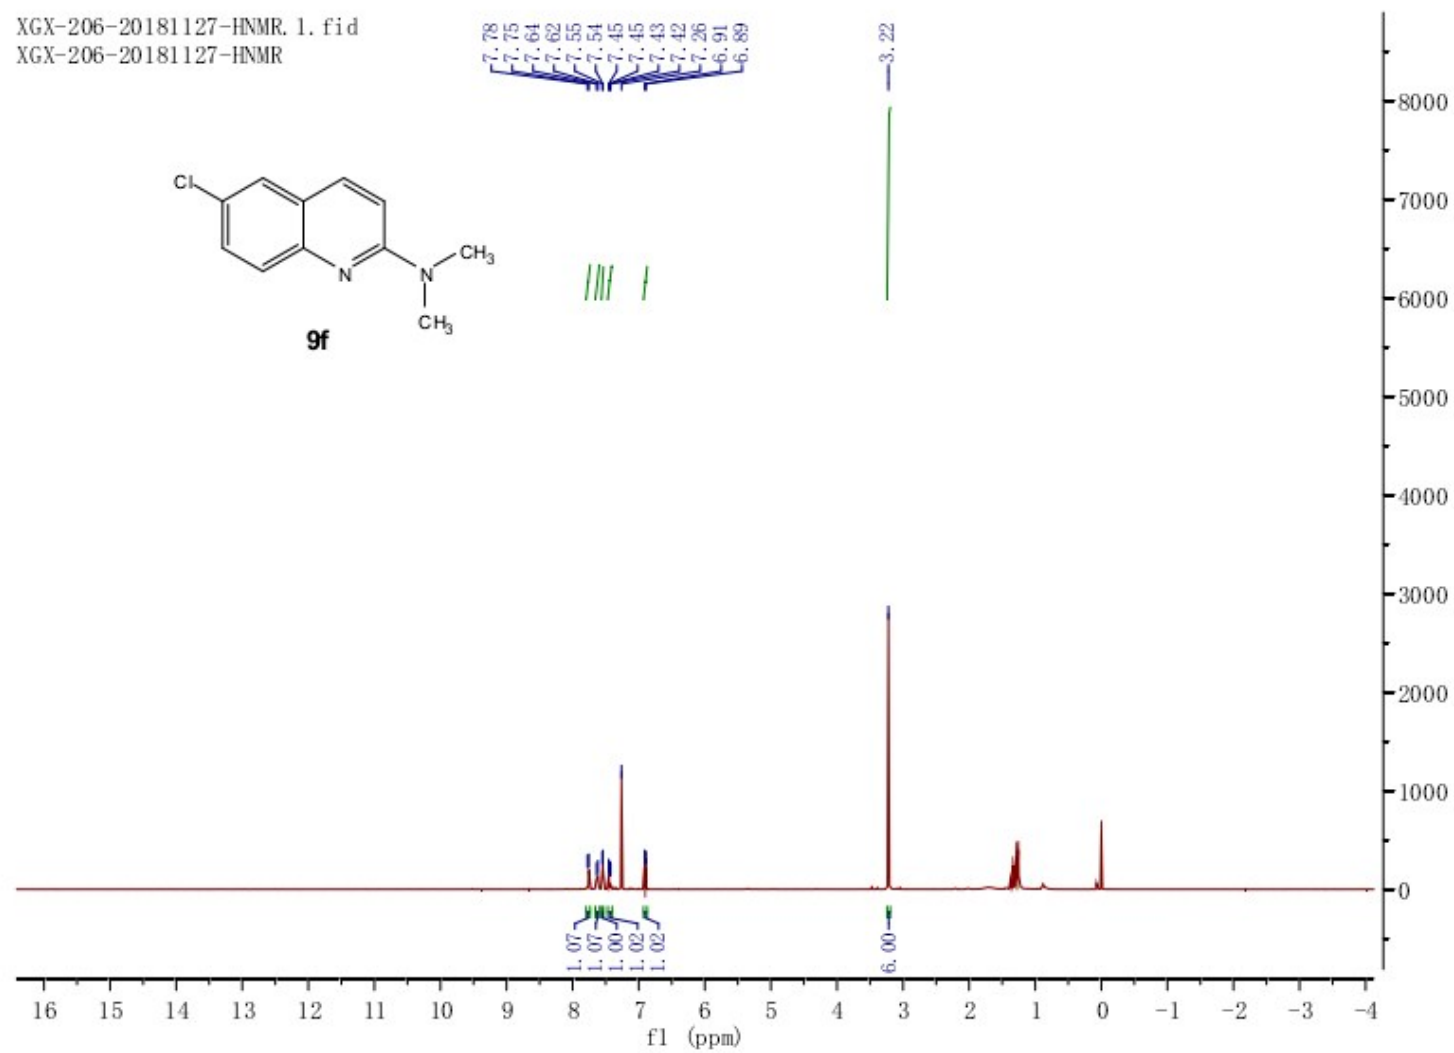

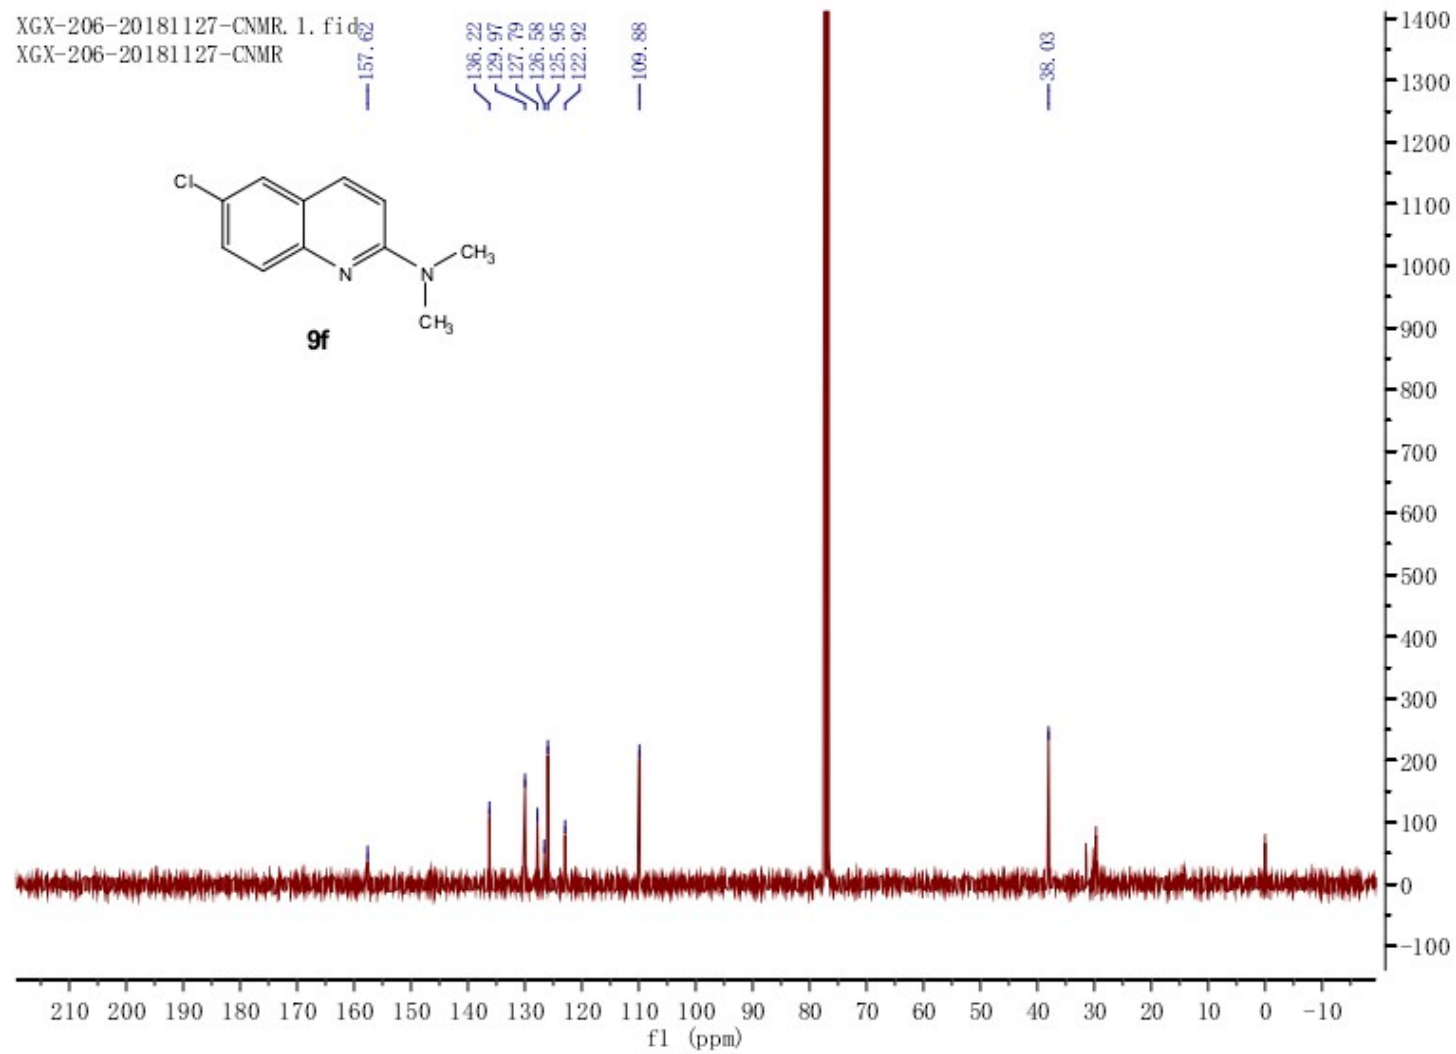

9H-20181203-HNMR. 1. fid  
9H-20181203-HNMR

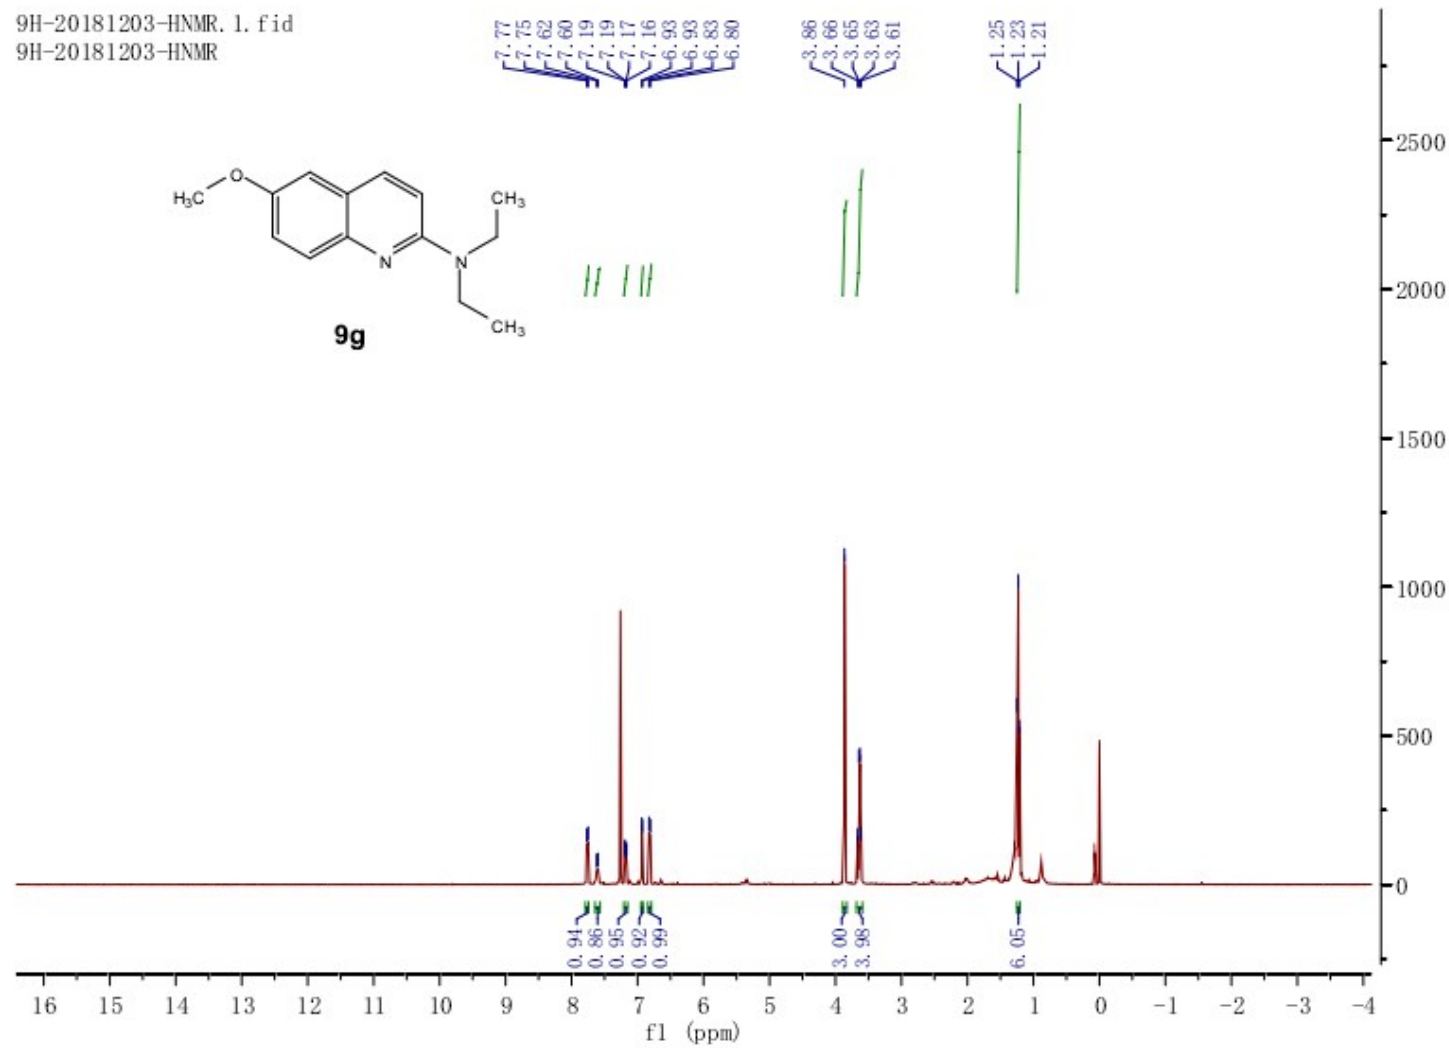



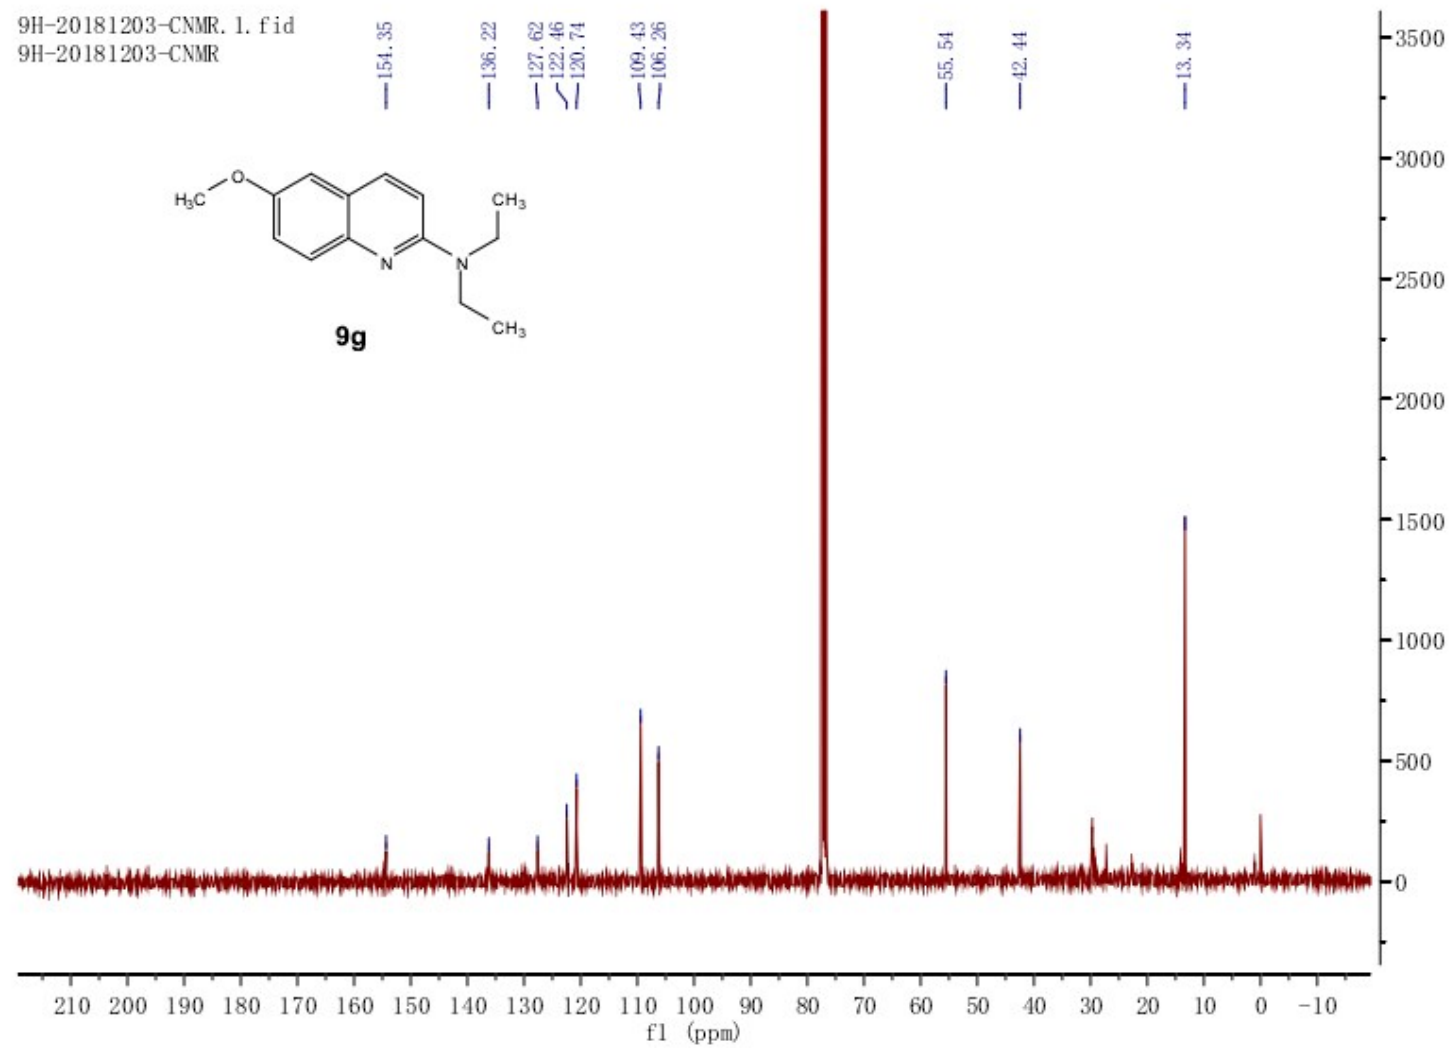

X3-214-20181127-HNMR.1.fid  
X3-214-20181127-HNMR

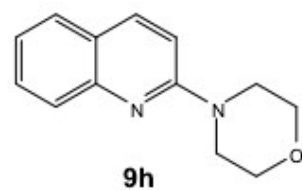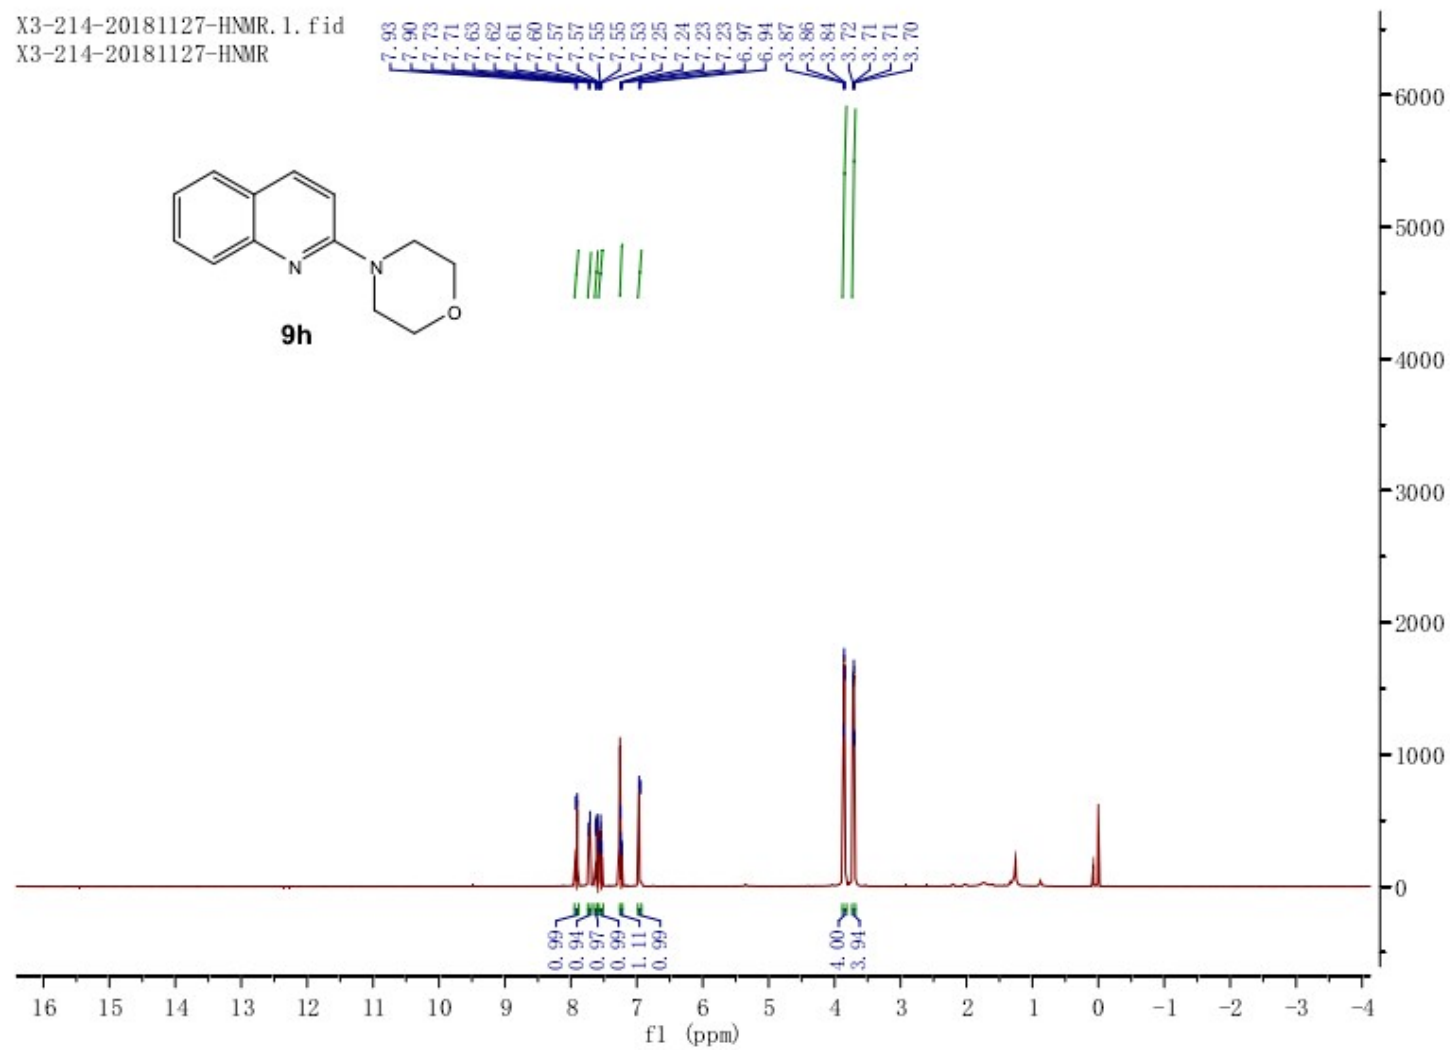

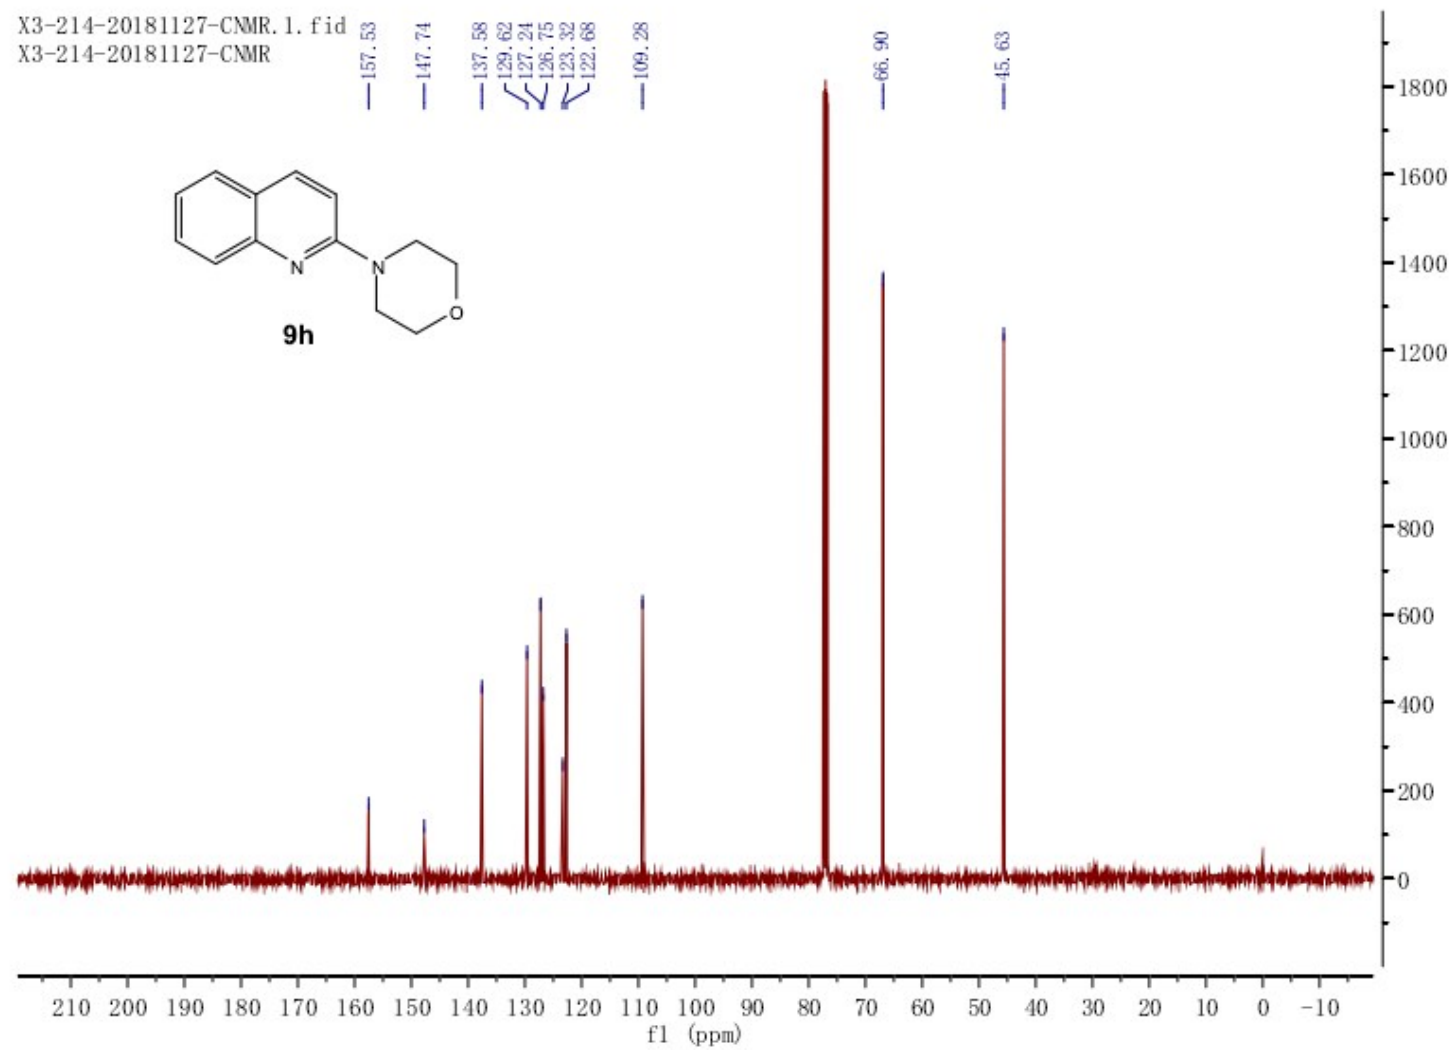

Xb3228

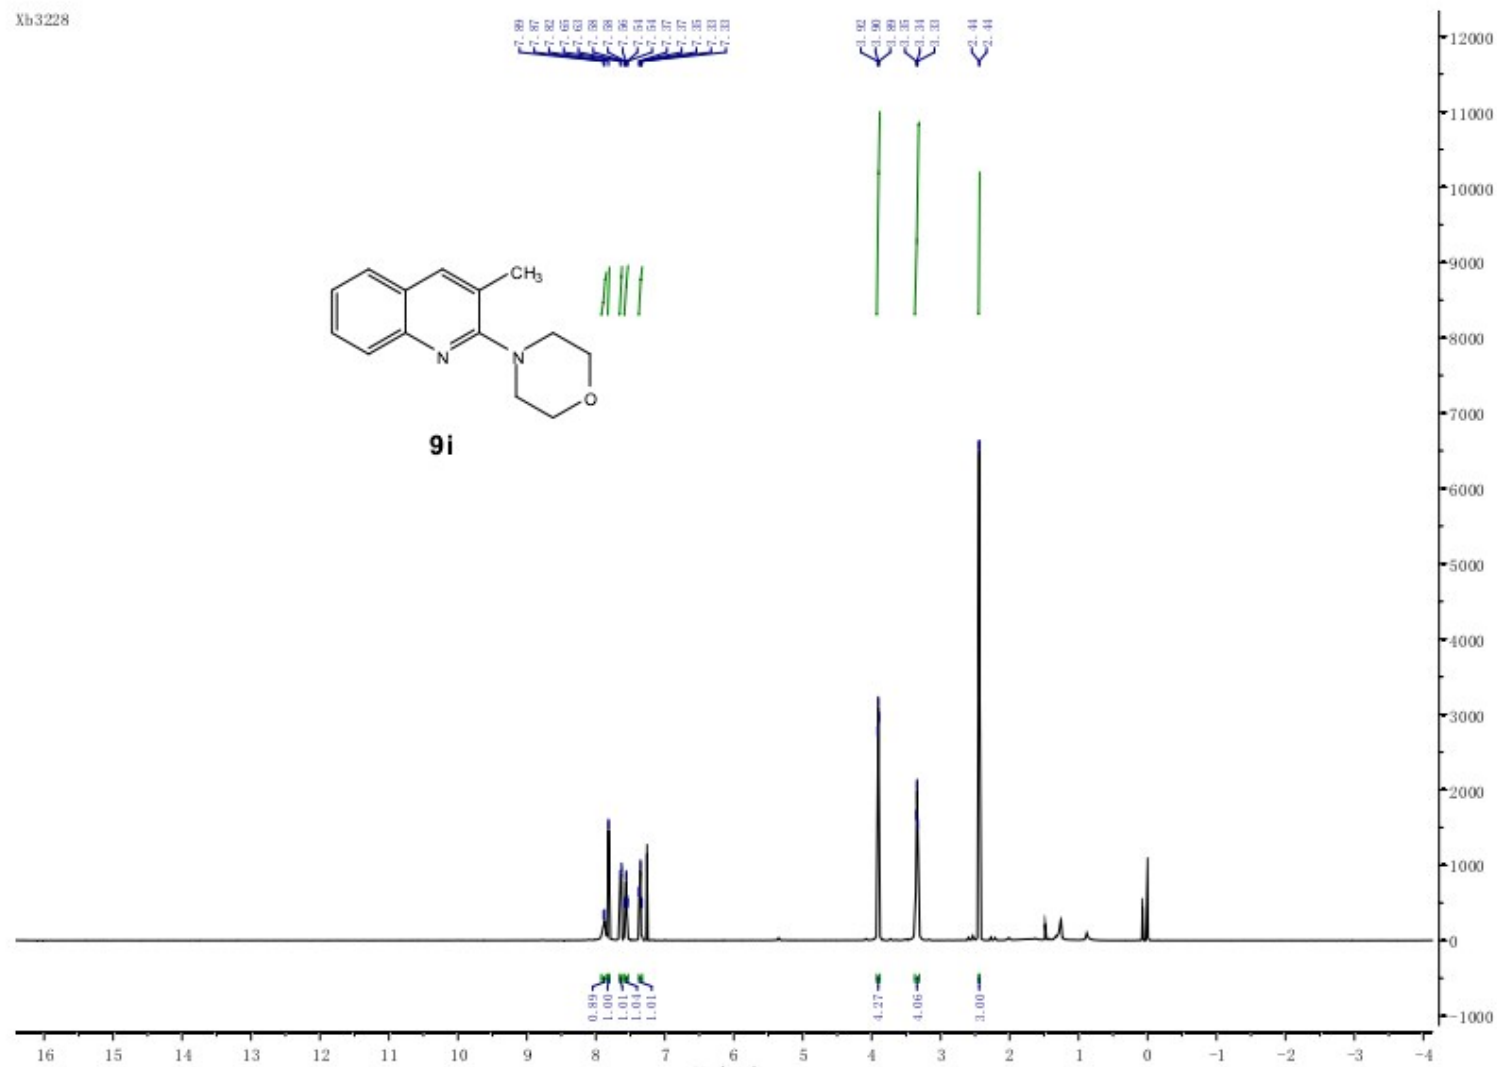

XGxb-228-20170104-CMR  
XGxb-228-20170104-CMR

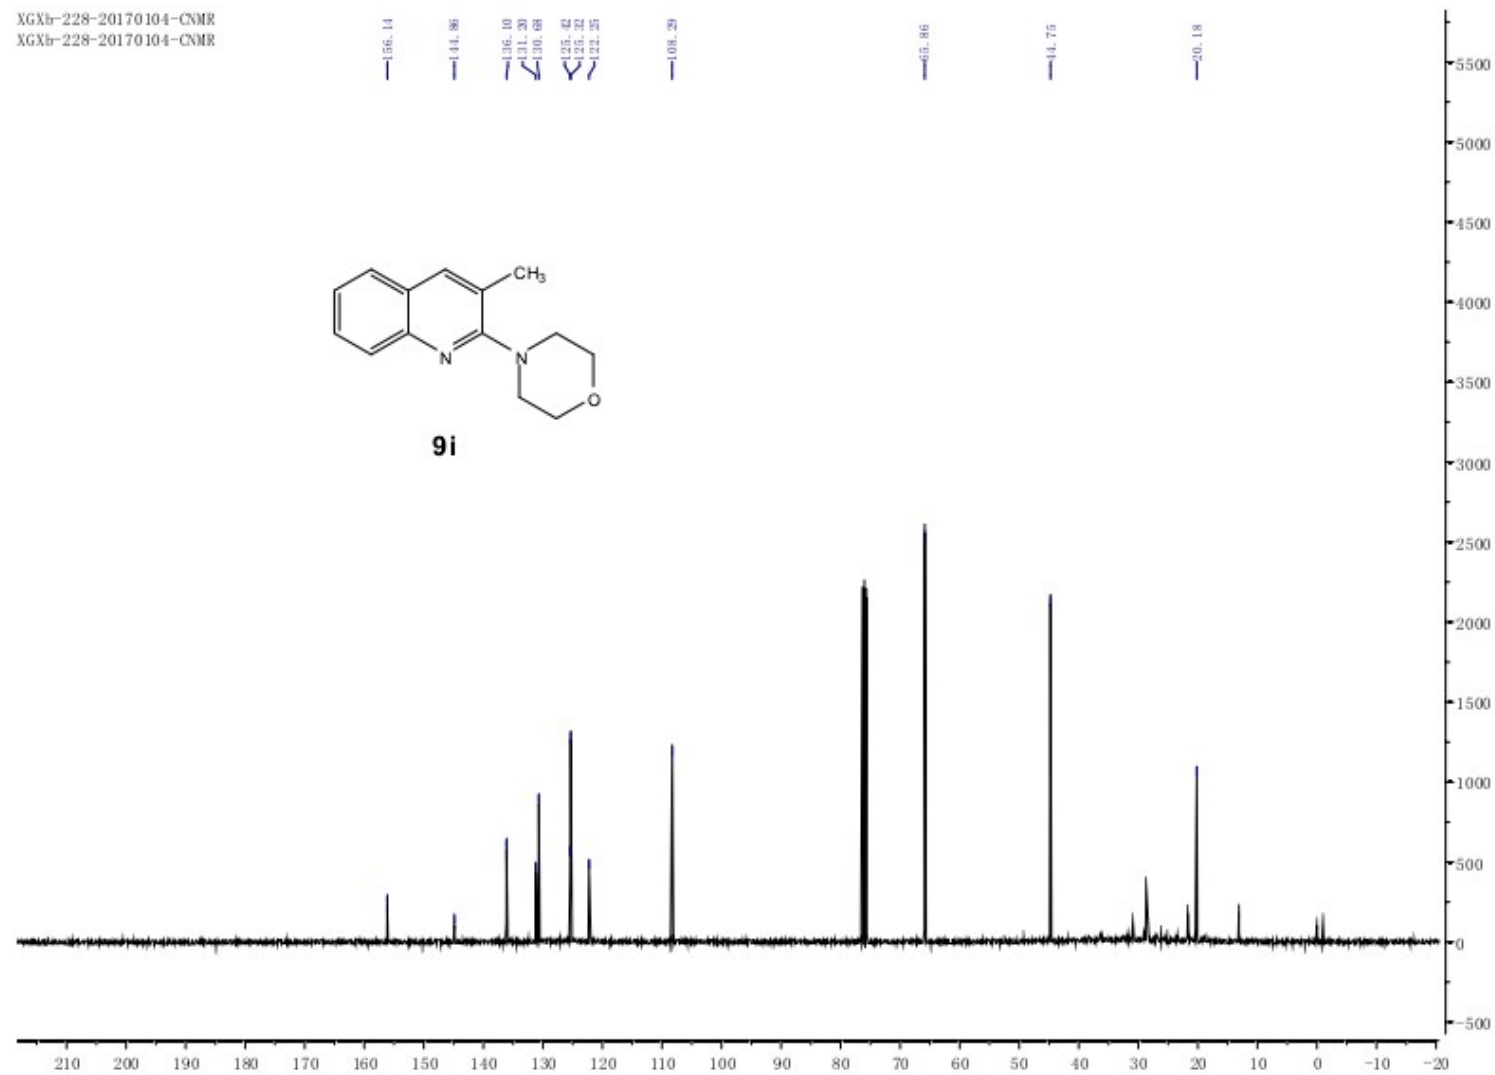

| Food Item | Number of People |
|-----------|------------------|
| Pizza     | 70               |
| Hamburger | 60               |
| Sandwich  | 50               |
| Salad     | 40               |
| Fruit     | 30               |

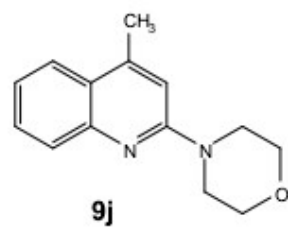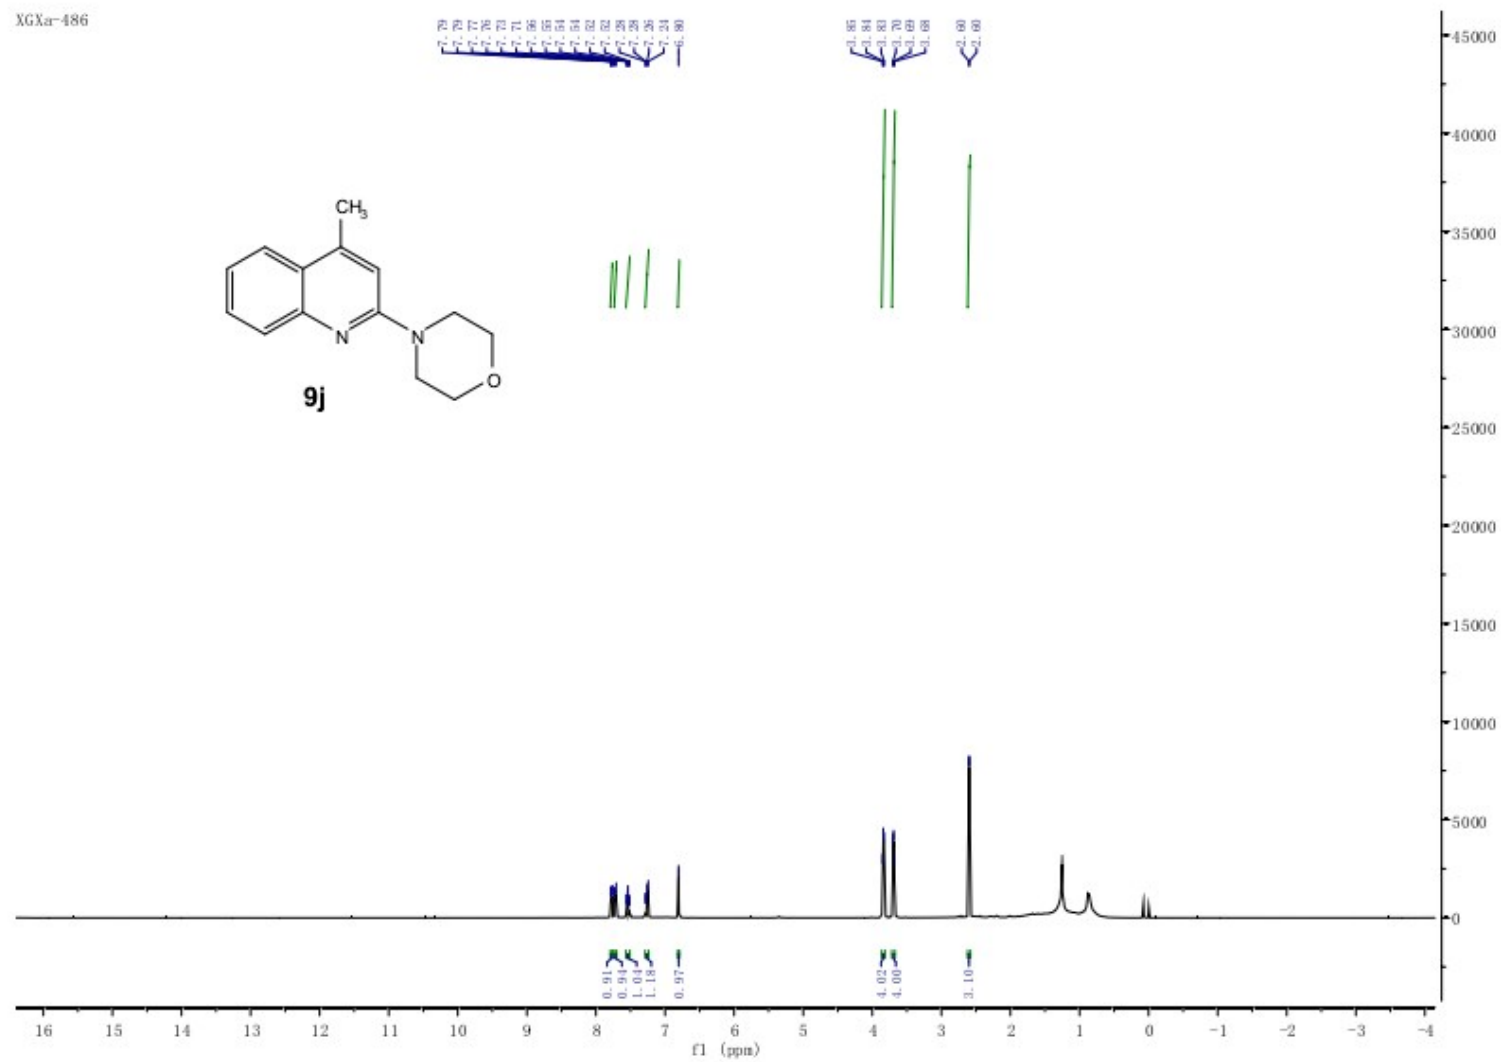

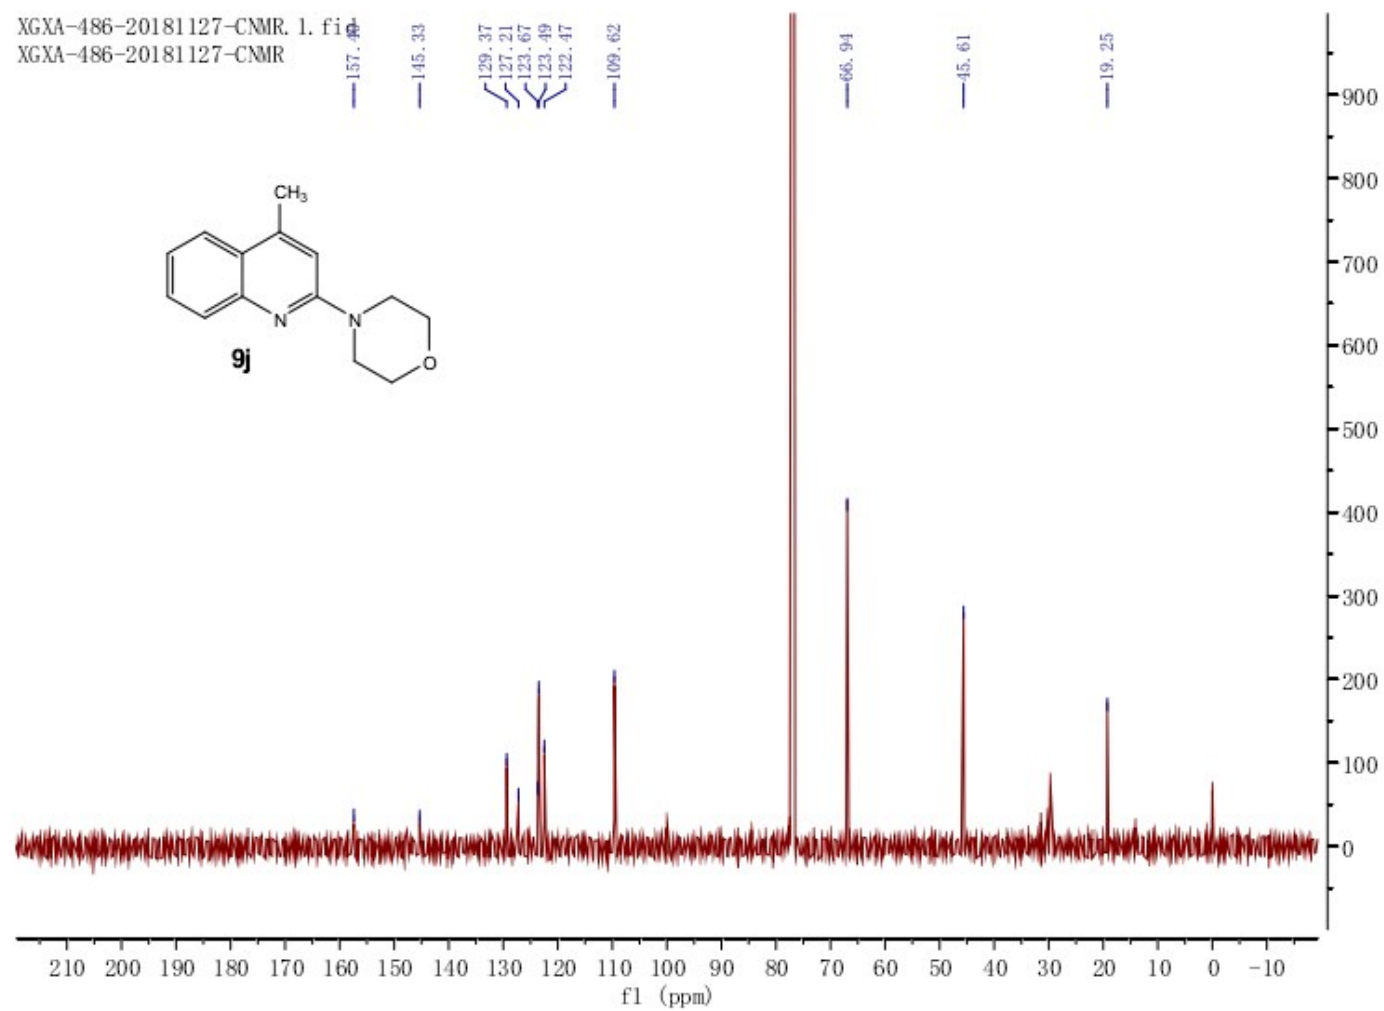

XGX-22

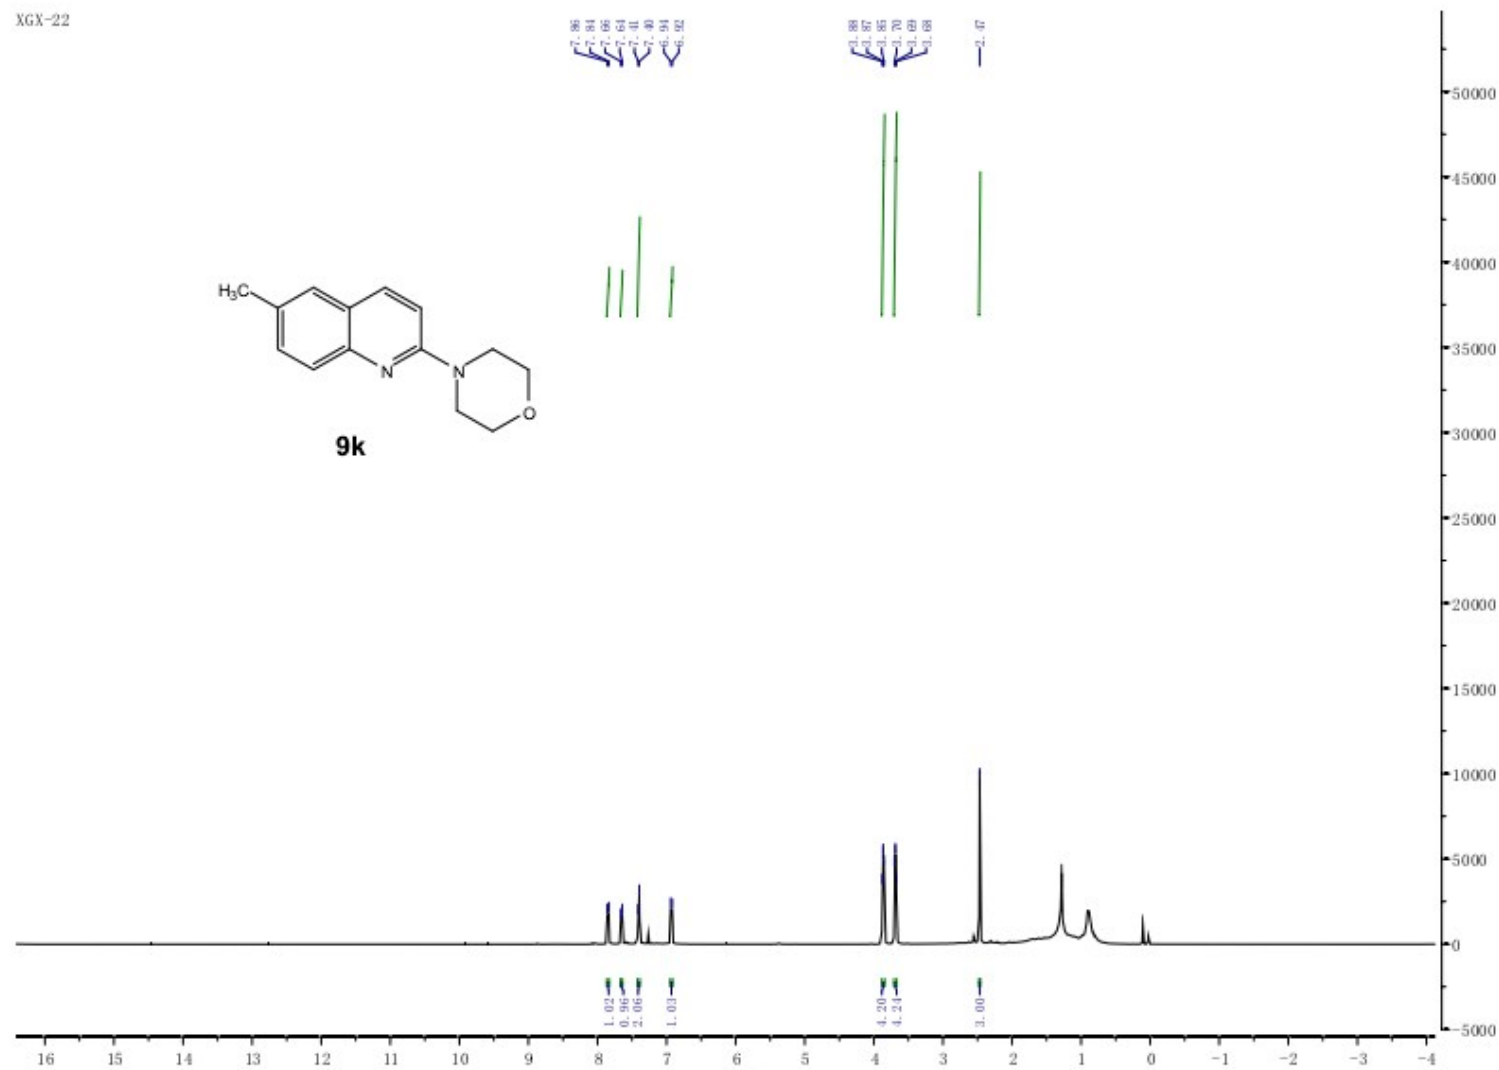



XGX17e-20170110-CNMR. 1.fid  
XGX17e-20170110-CNMR

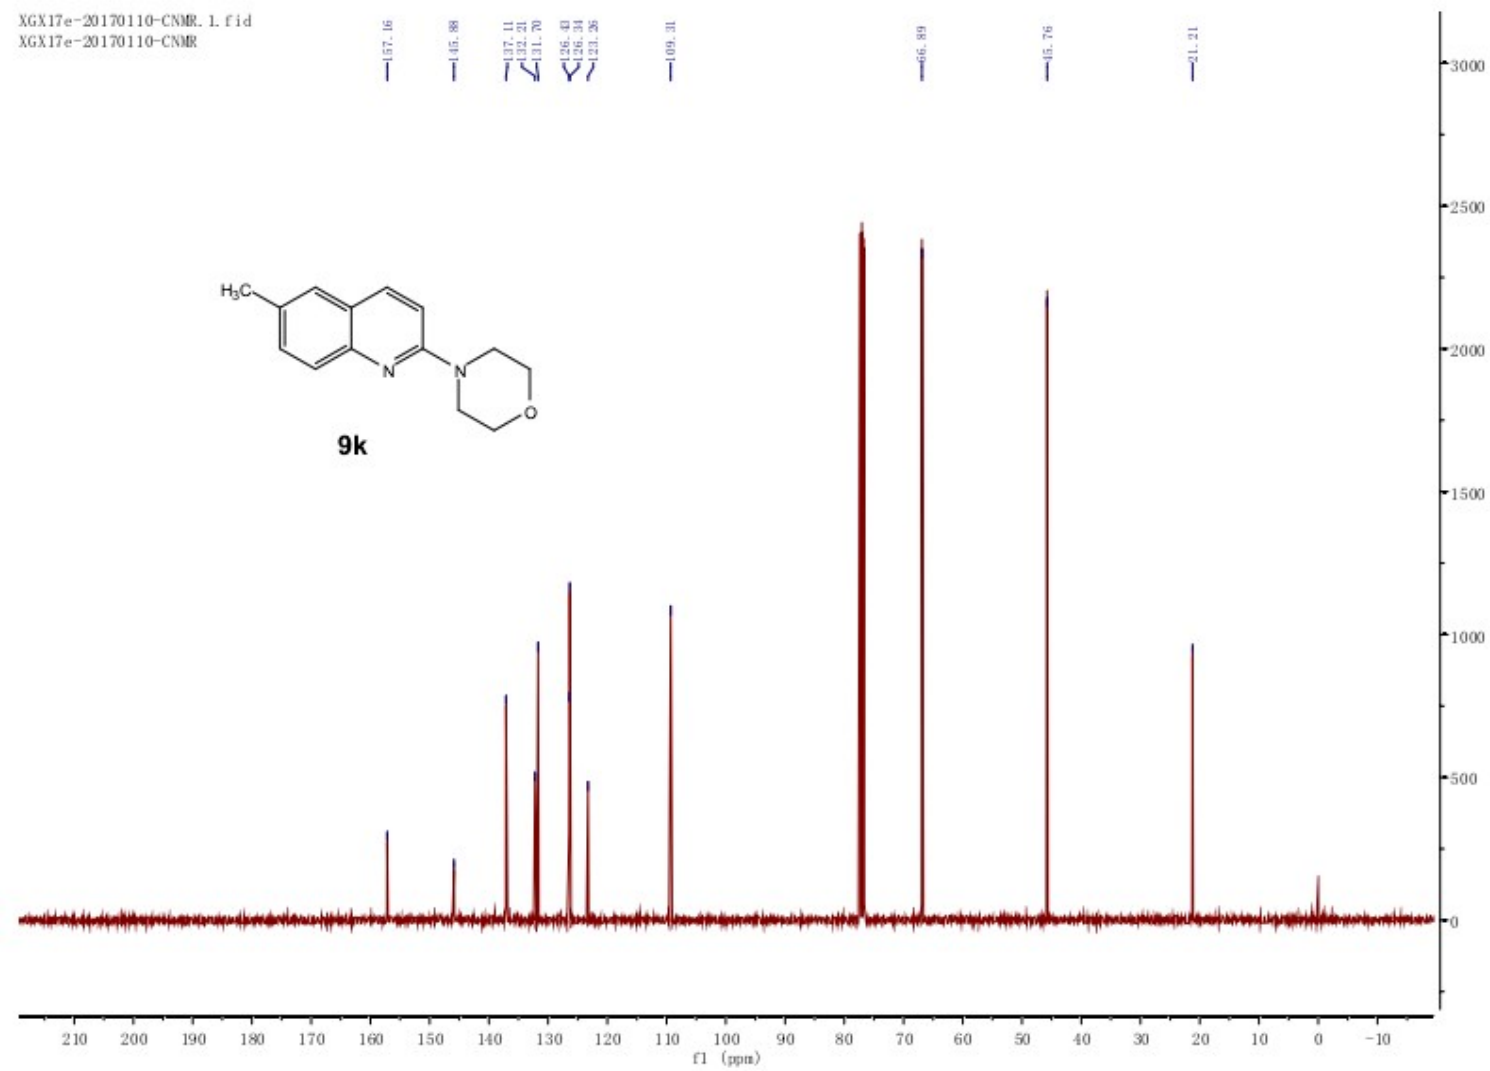

X5-244

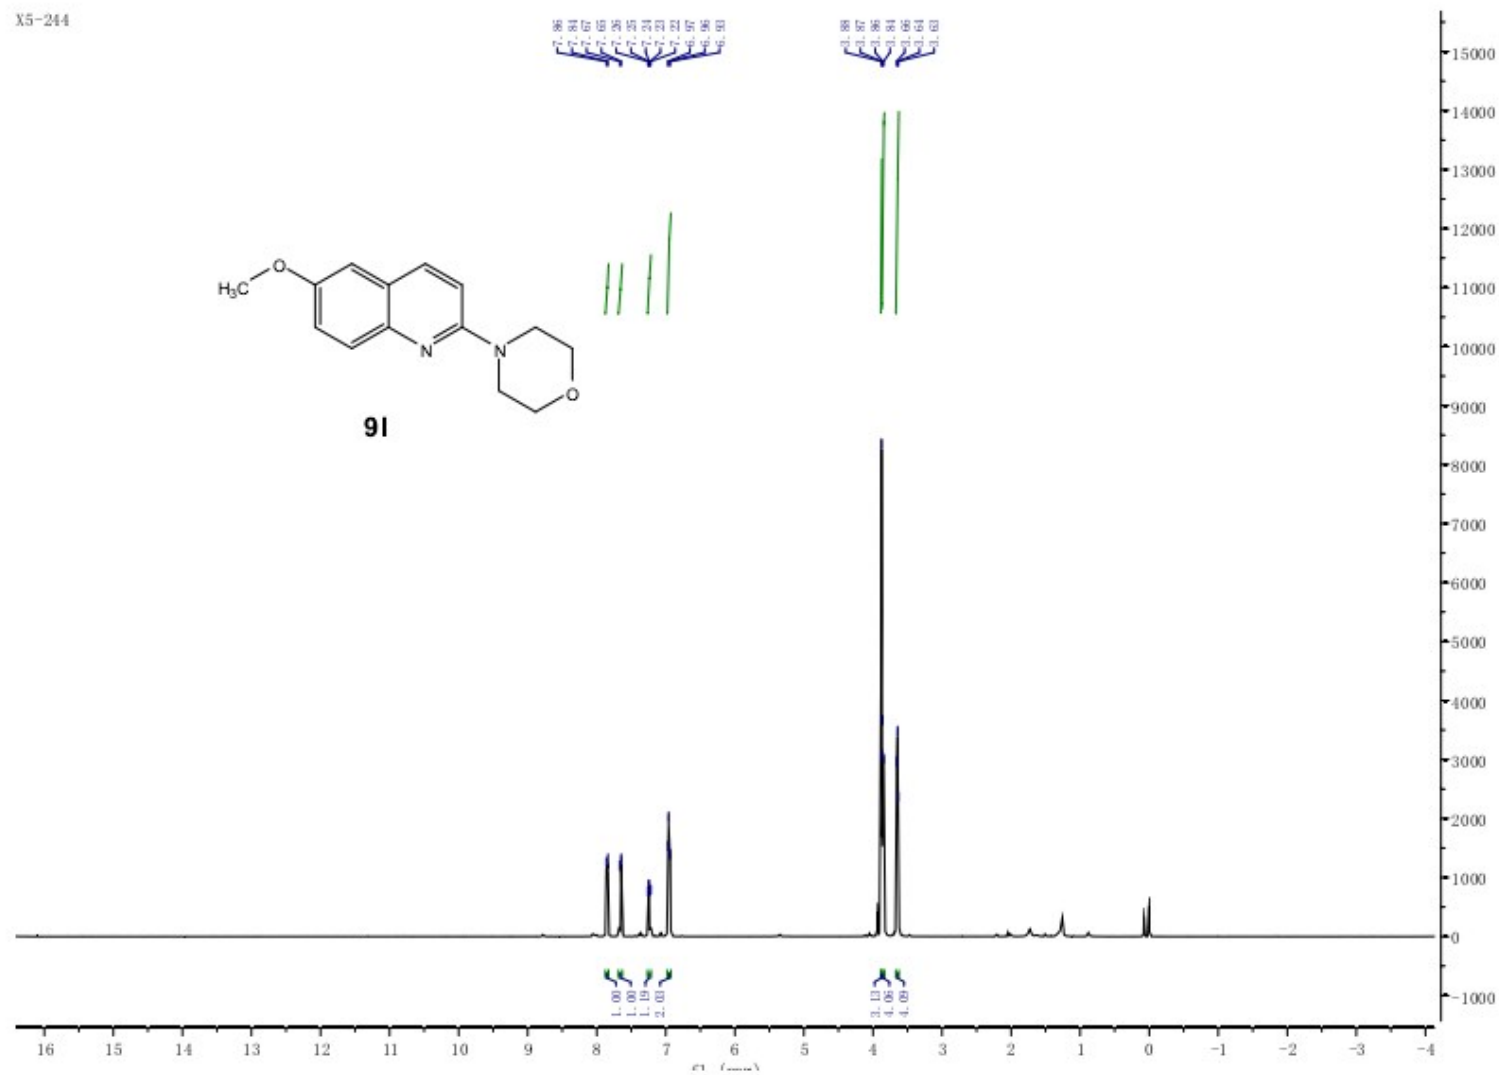

XGX-6JML-20171109-CNMR 1. fid  
XGX-6JML-20171109-CNMR

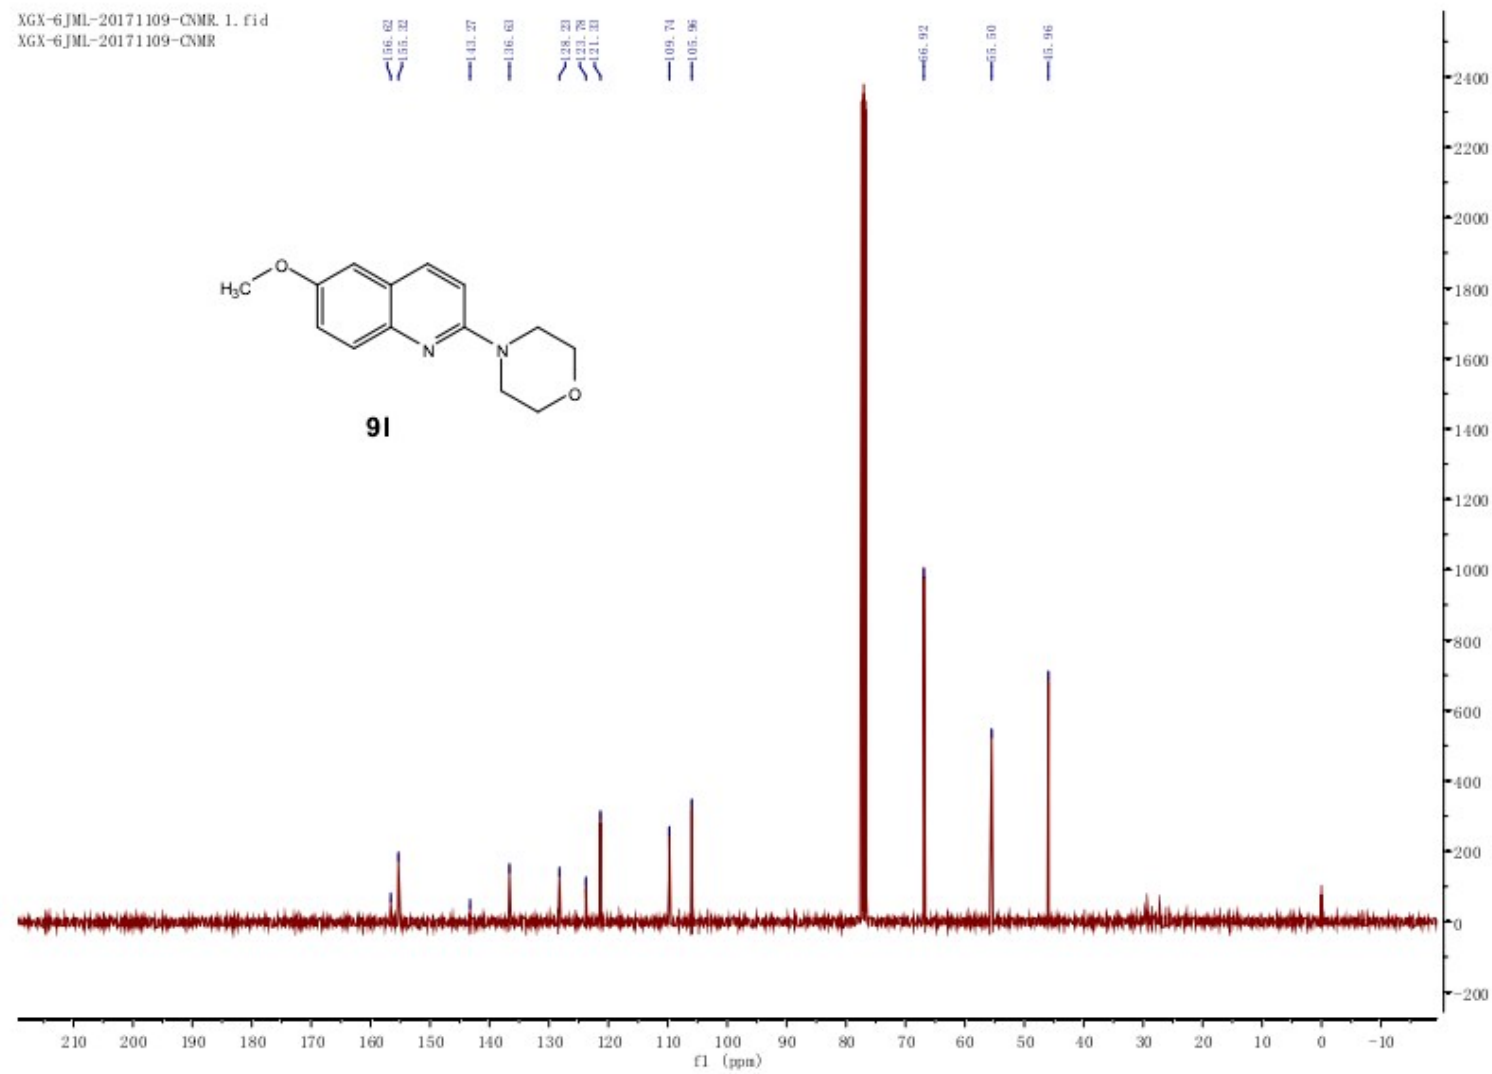

XC-248

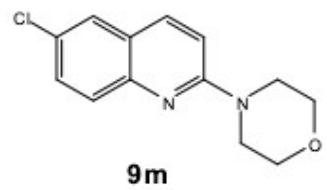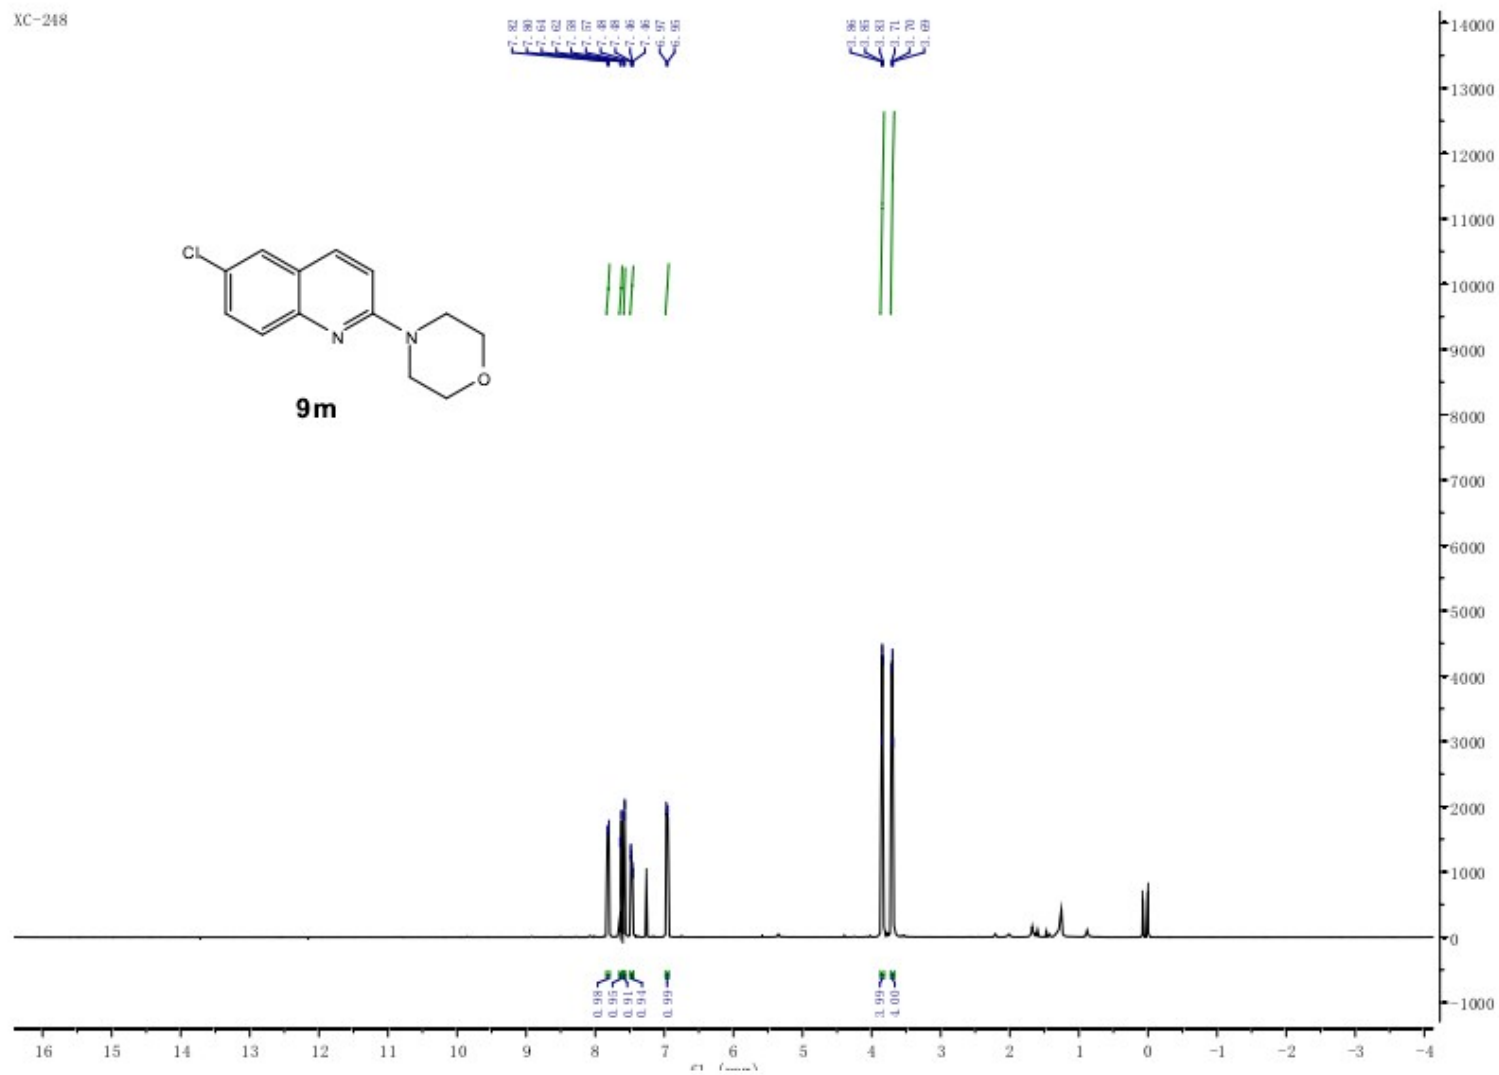

XGX-6LML-20171101-CNMR 1. fid  
XGX-6LML-20171101-CNMR

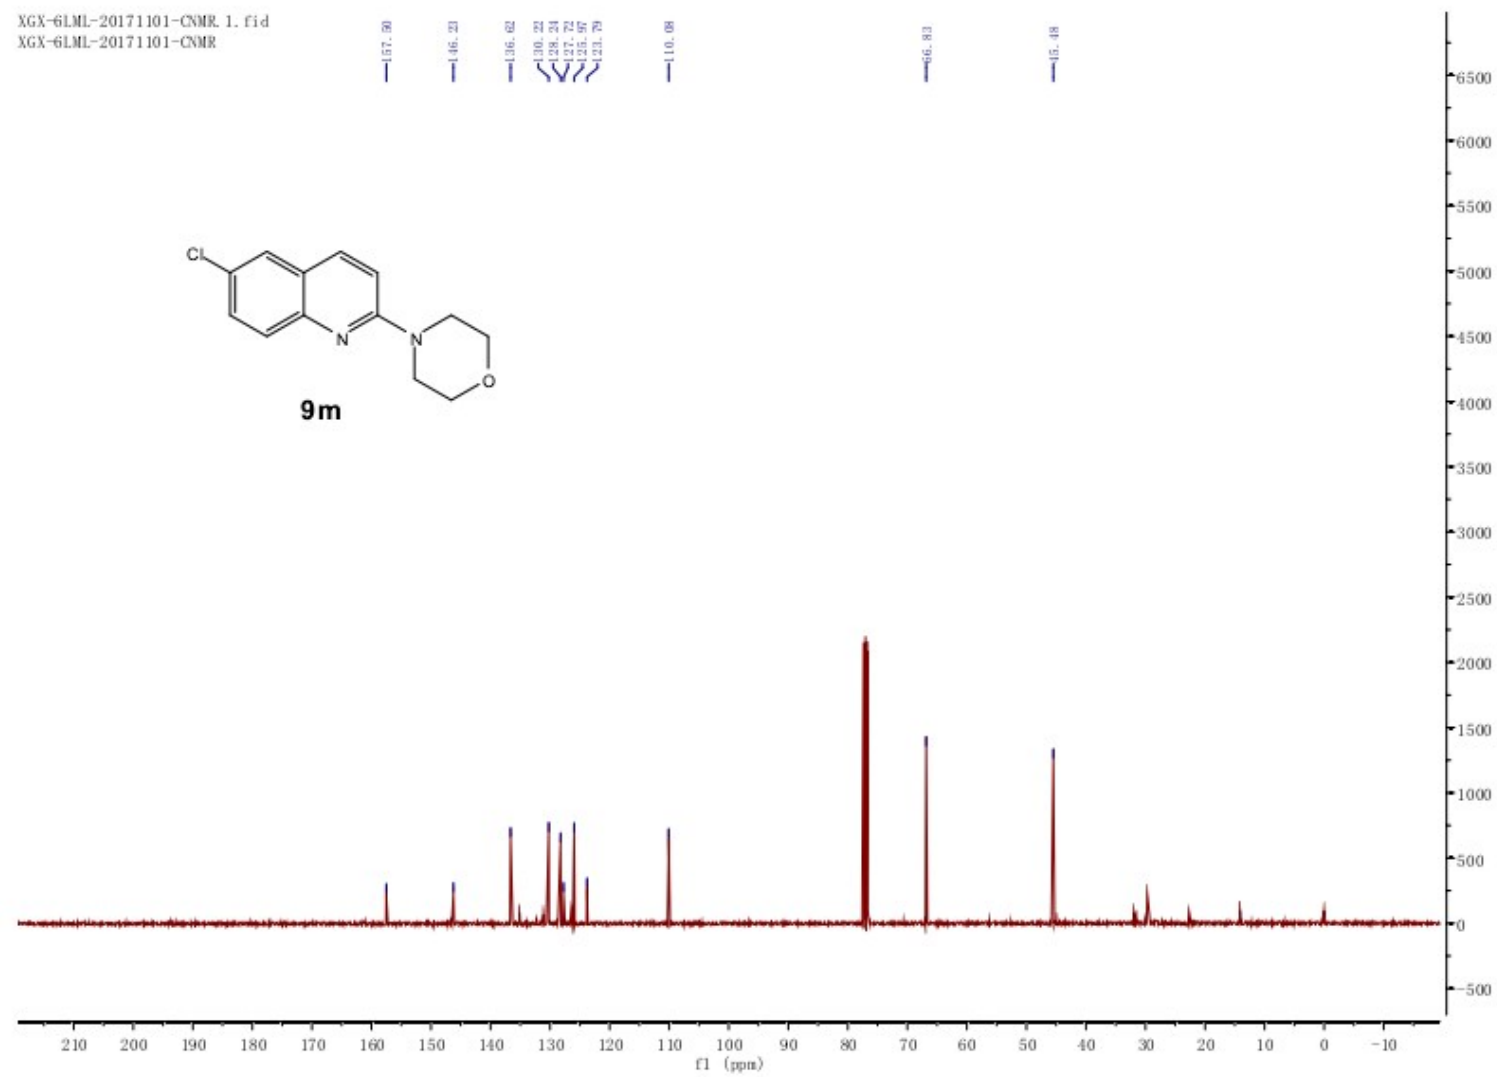

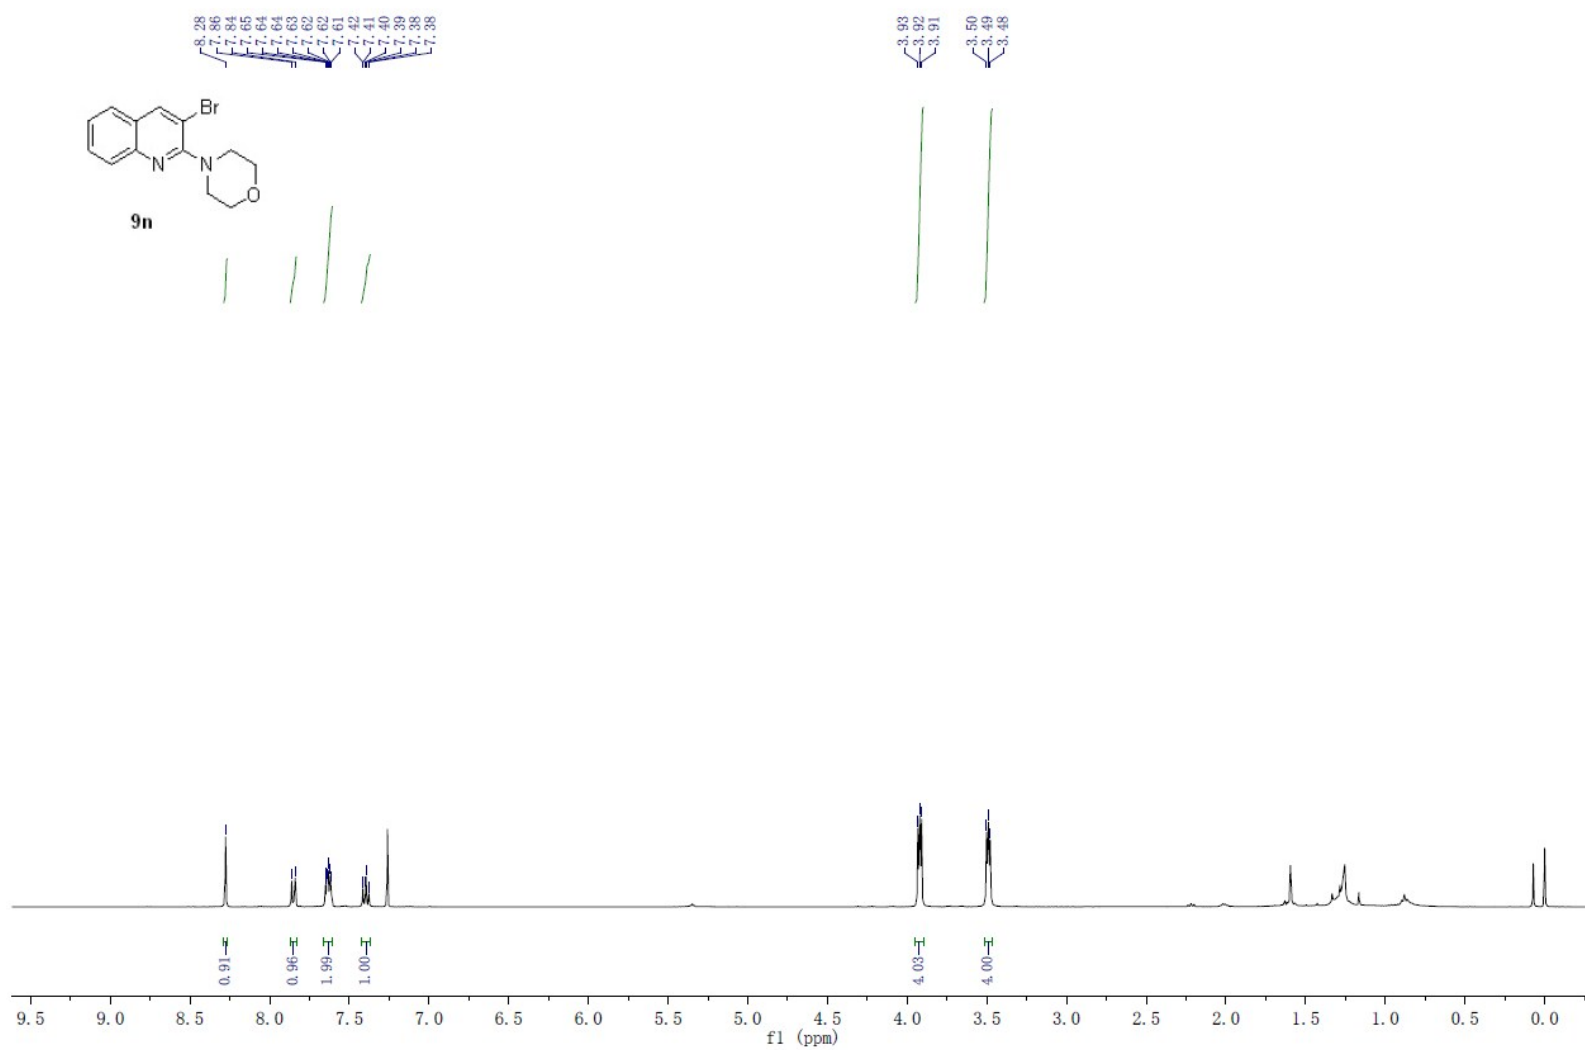

XGXd-293-20170110-CNMR 1. fid  
XGXd-293-20170110-CNMR

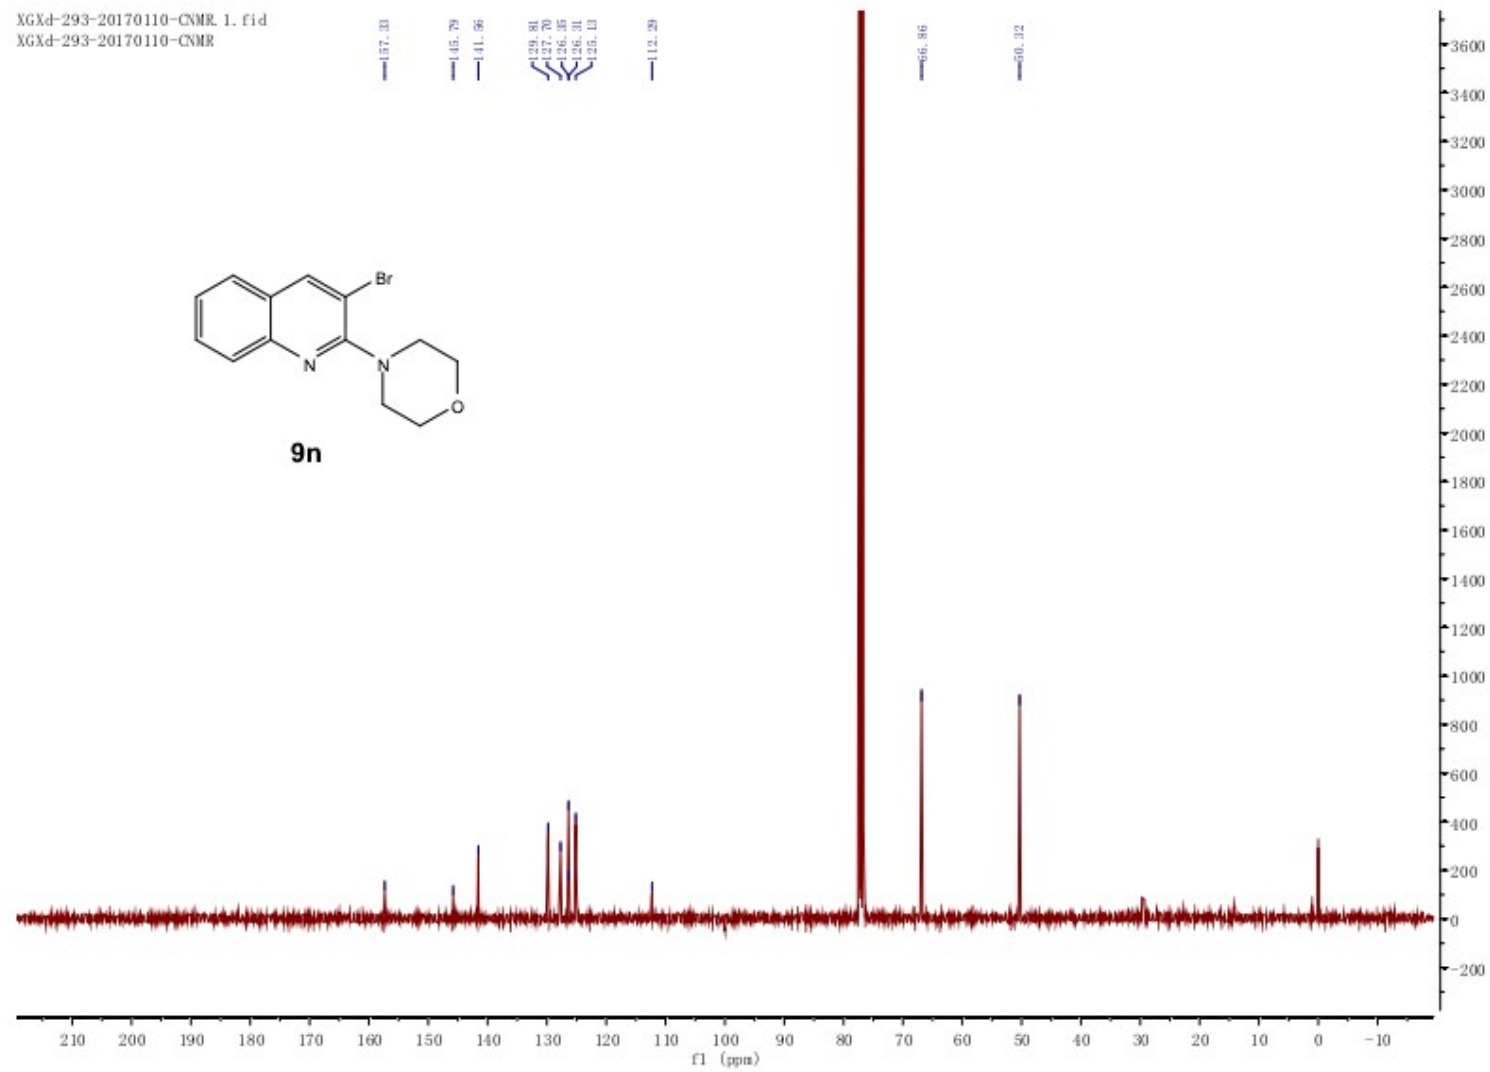

X1227-9-20170104-HNMR. 1. fid  
X1227-9-20170104-HNMR

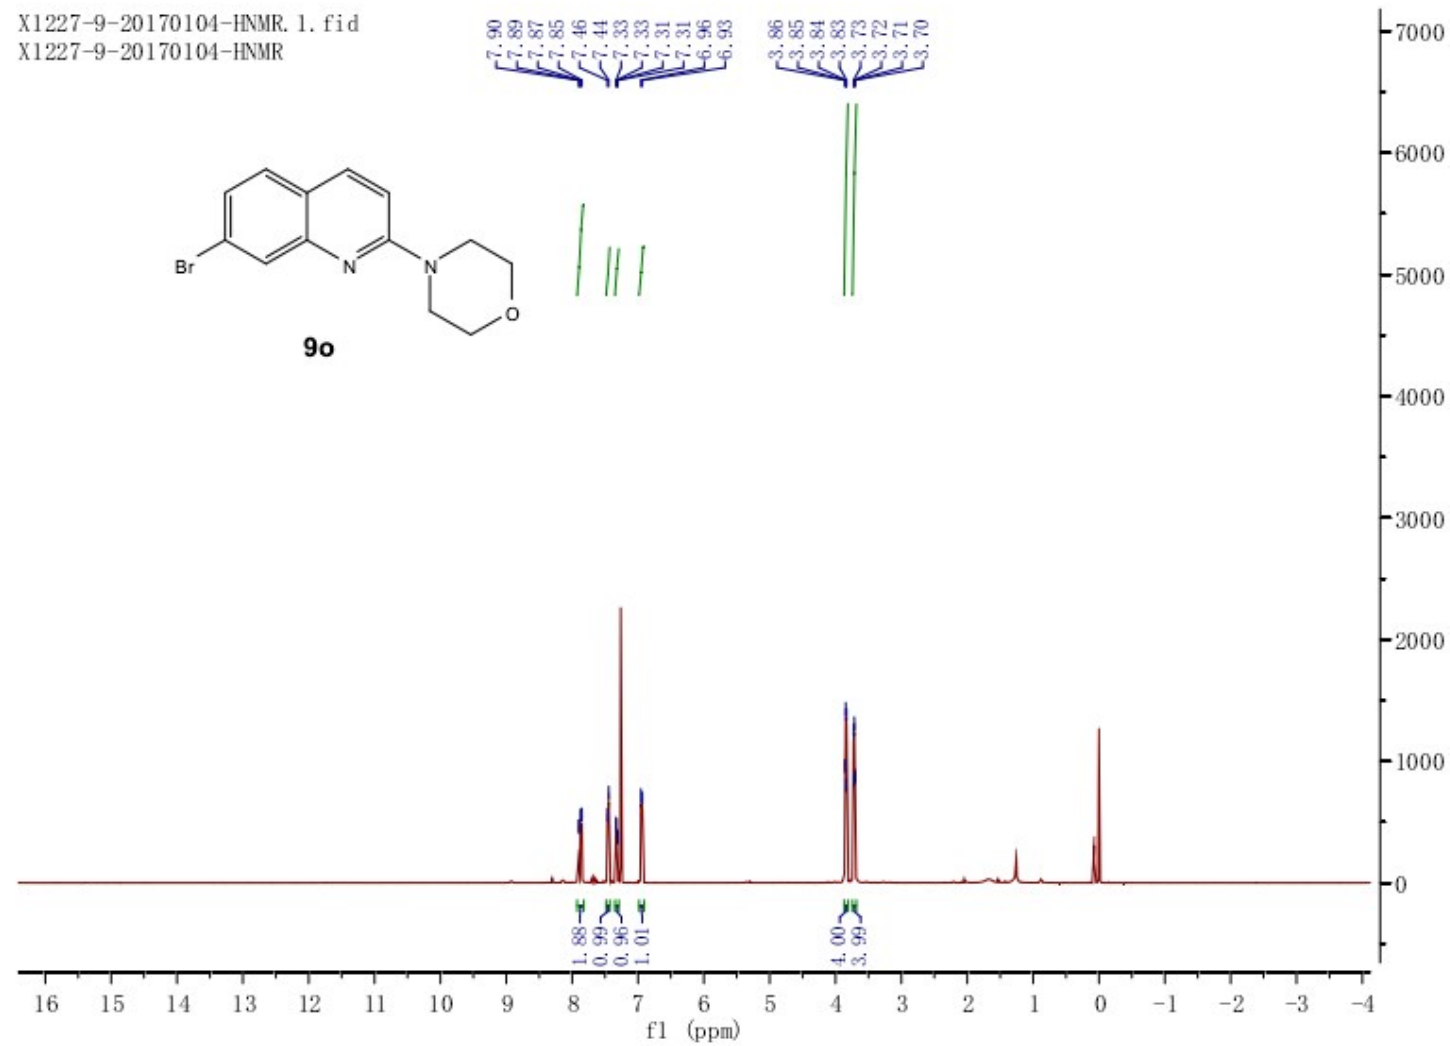



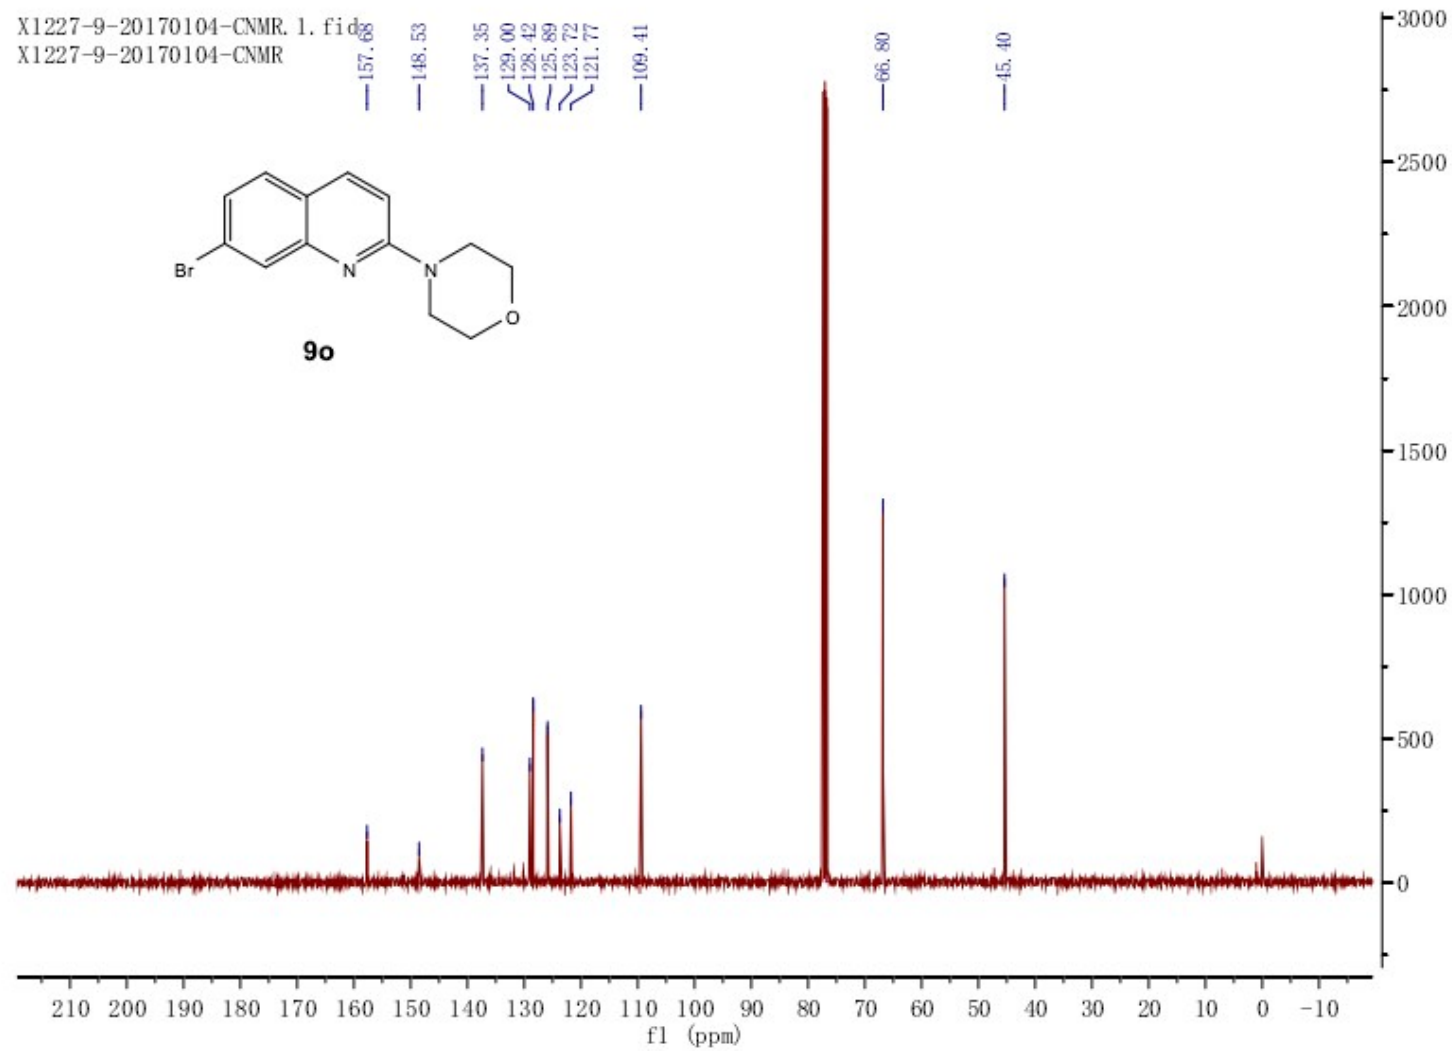

Supplement: c8ob02844c1.pdf [file c8ob02844c1.pdf]
